# Supplementary material
Source: MDPI journal article supplement (https://www.mdpi.com/2224-2708/2/1/46)
Supplement: s1 [file s1]

<?xml version="1.0" encoding="UTF-8" standalone="no"?>
<?validation-md5-digest ccec037d2d43a3d028eff5c90acd6d40?>
<worksheet version="3.0.3" xmlns="http://schemas.mathsoft.com/worksheet30" xmlns:xsi="http://www.w3.org/2001/XMLSchema-instance" xmlns:ws="http://schemas.mathsoft.com/worksheet30" xmlns:ml="http://schemas.mathsoft.com/math30" xmlns:u="http://schemas.mathsoft.com/units10" xmlns:p="http://schemas.mathsoft.com/provenance10">
	<pointReleaseData/>
	<metadata>
		<generator>Mathcad Professional 14.0</generator>
		<userData>
			<title/>
			<description/>
			<author>Dayan</author>
			<company/>
			<keywords/>
			<revisedBy>user</revisedBy>
		</userData>
		<identityInfo>
			<revision>26</revision>
			<documentID>1E5A1462-8B1D-49AD-ABAD-DE93D0DBCEE3</documentID>
			<versionID>5B8F280C-979C-4CB4-8E7C-6FD19CC70E5A</versionID>
			<parentVersionID>00000000-0000-0000-0000-000000000000</parentVersionID>
			<branchID>00000000-0000-0000-0000-000000000000</branchID>
		</identityInfo>
	</metadata>
	<settings>
		<presentation>
			<textRendering>
				<textStyles>
					<textStyle name="Normal">
						<blockAttr margin-left="0" margin-right="0" text-indent="inherit" text-align="left" list-style-type="inherit" tabs="inherit"/>
						<inlineAttr font-family="Arial" font-charset="0" font-size="10" font-weight="normal" font-style="normal" underline="false" line-through="false" vertical-align="baseline"/>
					</textStyle>
					<textStyle name="Heading 1">
						<blockAttr margin-left="0" margin-right="0" text-indent="inherit" text-align="left" list-style-type="inherit" tabs="inherit"/>
						<inlineAttr font-family="Arial" font-charset="0" font-size="14" font-weight="bold" font-style="normal" underline="false" line-through="false" vertical-align="baseline"/>
					</textStyle>
					<textStyle name="Heading 2">
						<blockAttr margin-left="0" margin-right="0" text-indent="inherit" text-align="left" list-style-type="inherit" tabs="inherit"/>
						<inlineAttr font-family="Arial" font-charset="0" font-size="12" font-weight="bold" font-style="italic" underline="false" line-through="false" vertical-align="baseline"/>
					</textStyle>
					<textStyle name="Heading 3">
						<blockAttr margin-left="0" margin-right="0" text-indent="inherit" text-align="left" list-style-type="inherit" tabs="inherit"/>
						<inlineAttr font-family="Arial" font-charset="0" font-size="12" font-weight="normal" font-style="normal" underline="false" line-through="false" vertical-align="baseline"/>
					</textStyle>
					<textStyle name="Paragraph">
						<blockAttr margin-left="0" margin-right="0" text-indent="21" text-align="left" list-style-type="inherit" tabs="inherit"/>
						<inlineAttr font-family="Arial" font-charset="0" font-size="10" font-weight="normal" font-style="normal" underline="false" line-through="false" vertical-align="baseline"/>
					</textStyle>
					<textStyle name="List">
						<blockAttr margin-left="14.4" margin-right="0" text-indent="-14.4" text-align="left" list-style-type="inherit" tabs="inherit"/>
						<inlineAttr font-family="Arial" font-charset="0" font-size="10" font-weight="normal" font-style="normal" underline="false" line-through="false" vertical-align="baseline"/>
					</textStyle>
					<textStyle name="Indent">
						<blockAttr margin-left="108" margin-right="0" text-indent="inherit" text-align="left" list-style-type="inherit" tabs="inherit"/>
						<inlineAttr font-family="Arial" font-charset="0" font-size="10" font-weight="normal" font-style="normal" underline="false" line-through="false" vertical-align="baseline"/>
					</textStyle>
					<textStyle name="Title">
						<blockAttr margin-left="0" margin-right="0" text-indent="inherit" text-align="center" list-style-type="inherit" tabs="inherit"/>
						<inlineAttr font-family="Times New Roman" font-charset="0" font-size="24" font-weight="bold" font-style="normal" underline="false" line-through="false" vertical-align="baseline"/>
					</textStyle>
					<textStyle name="Subtitle" base-style="Title">
						<blockAttr margin-left="0" margin-right="0" text-indent="inherit" text-align="center" list-style-type="inherit" tabs="inherit"/>
						<inlineAttr font-family="Times New Roman" font-charset="0" font-size="18" font-weight="normal" font-style="normal" underline="false" line-through="false" vertical-align="baseline"/>
					</textStyle>
				</textStyles>
			</textRendering>
			<mathRendering equation-color="#000">
				<operators multiplication="narrow-dot" derivative="derivative" literal-subscript="large" definition="colon-equal" global-definition="triple-equal" local-definition="left-arrow" equality="bold-equal" symbolic-evaluation="right-arrow"/>
				<mathStyles>
					<mathStyle name="Variables" font-family="Times New Roman" font-charset="0" font-size="10" font-weight="normal" font-style="italic" underline="false"/>
					<mathStyle name="Constants" font-family="Times New Roman" font-charset="0" font-size="10" font-weight="normal" font-style="normal" underline="false"/>
					<mathStyle name="User 1" font-family="Arial" font-charset="0" font-size="10" font-weight="normal" font-style="normal" underline="false"/>
					<mathStyle name="User 2" font-family="Courier New" font-charset="0" font-size="10" font-weight="normal" font-style="normal" underline="false"/>
					<mathStyle name="User 3" font-family="Arial" font-charset="0" font-size="10" font-weight="bold" font-style="normal" underline="false"/>
					<mathStyle name="User 4" font-family="Times New Roman" font-charset="0" font-size="10" font-weight="normal" font-style="italic" underline="false"/>
					<mathStyle name="User 5" font-family="Times New Roman" font-charset="0" font-size="10" font-weight="normal" font-style="normal" underline="false"/>
					<mathStyle name="User 6" font-family="Arial" font-charset="0" font-size="10" font-weight="normal" font-style="normal" underline="false"/>
					<mathStyle name="User 7" font-family="Times New Roman" font-charset="0" font-size="10" font-weight="normal" font-style="normal" underline="false"/>
					<mathStyle name="Math Text Font" font-family="Times New Roman" font-charset="0" font-size="10" font-weight="normal" font-style="italic" underline="false"/>
				</mathStyles>
				<dimensionNames mass="mass" length="length" time="time" current="charge" thermodynamic-temperature="temperature" luminous-intensity="luminosity" amount-of-substance="substance" display="false"/>
				<symbolics derivation-steps-style="vertical-insert" show-comments="false" evaluate-in-place="false"/>
				<results numeric-only="true">
					<general precision="3" show-trailing-zeros="false" radix="dec" complex-threshold="10" zero-threshold="15" imaginary-value="i" exponential-threshold="3"/>
					<matrix display-style="auto" expand-nested-arrays="false"/>
					<unit format-units="true" simplify-units="true" fractional-unit-exponent="false"/>
				</results>
			</mathRendering>
			<pageModel show-page-frame="false" show-header-frame="false" show-footer-frame="false" header-footer-start-page="1" paper-code="9" orientation="portrait" print-single-page-width="false" page-width="595.2" page-height="841.8">
				<margins left="0" right="0" top="11.28" bottom="16.68"/>
				<header use-full-page-width="false"/>
				<footer use-full-page-width="false"/>
			</pageModel>
			<colorModel background-color="#fff" default-highlight-color="#ffff80"/>
			<language math="en" UI="en"/>
		</presentation>
		<calculation>
			<builtInVariables array-origin="0" convergence-tolerance="0.001" constraint-tolerance="0.001" random-seed="1" prn-precision="4" prn-col-width="8"/>
			<calculationBehavior automatic-recalculation="false" matrix-strict-singularity-check="true" optimize-expressions="false" exact-boolean="false" strings-use-origin="false" zero-over-zero="0">
				<compatibility multiple-assignment="MC11" local-assignment="MC11"/>
			</calculationBehavior>
			<units>
				<currentUnitSystem name="none" customized="false"/>
			</units>
		</calculation>
		<editor view-annotations="false" view-regions="false">
			<ruler is-visible="false" ruler-unit="cm"/>
			<plotTemplate>
				<xy item-idref="1"/>
			</plotTemplate>
			<grid granularity-x="6" granularity-y="6"/>
		</editor>
		<fileFormat image-type="image/png" image-quality="75" save-numeric-results="true" exclude-large-results="true" save-text-images="false" screen-dpi="120"/>
		<miscellaneous>
			<handbook handbook-region-tag-ub="6853" can-delete-original-handbook-regions="true" can-delete-user-regions="true" can-print="true" can-copy="true" can-save="true" file-permission-mask="4294967295"/>
		</miscellaneous>
	</settings>
	<regions>
		<region region-id="625" left="6" top="16.8" width="579" height="57.6" align-x="21" align-y="30" show-border="false" show-highlight="true" is-protected="true" z-order="0" background-color="#80ffff" tag="">
			<text use-page-width="false" push-down="false" lock-width="true">
				<p style="Normal" margin-left="0" margin-right="0" text-indent="inherit" text-align="left" list-style-type="inherit" tabs="inherit">
					<f family="Arial" charset="0" size="14">
						<b>Performance of Cooperative Eigenvalue Spectrum Sensing with a Realistic Receiver Model under Impulsive Noise</b>
					</f>
				</p>
				<p style="Normal" margin-left="0" margin-right="0" text-indent="inherit" text-align="left" list-style-type="inherit" tabs="inherit"/>
				<p style="Normal" margin-left="0" margin-right="0" text-indent="inherit" text-align="left" list-style-type="inherit" tabs="inherit">
					<f family="Arial" charset="0" size="13">Dayan A. Guimarães, Rausley A. A. de Souza, </f>
					<f family="Arial" charset="0" size="13">
						<i>
							<sp/>
						</i>
					</f>
					<f family="Arial" charset="0" size="13">and André N. Barreto</f>
				</p>
			</text>
		</region>
		<region region-id="6572" left="6" top="111" width="109.2" height="11.4" align-x="22.8" align-y="120" show-border="false" show-highlight="false" is-protected="true" z-order="0" background-color="inherit" tag="">
			<text use-page-width="false" push-down="false" lock-width="false">
				<p style="Normal" margin-left="inherit" margin-right="inherit" text-indent="inherit" text-align="inherit" list-style-type="inherit" tabs="inherit">
					<b>SYSTEM PARAMETERS</b>
				</p>
			</text>
		</region>
		<region region-id="1468" left="6" top="134.4" width="151.8" height="13.2" align-x="21.6" align-y="144" show-border="false" show-highlight="false" is-protected="true" z-order="0" background-color="inherit" tag="">
			<text use-page-width="false" push-down="false" lock-width="false">
				<p style="Normal" margin-left="inherit" margin-right="inherit" text-indent="inherit" text-align="inherit" list-style-type="inherit" tabs="inherit">Number of cognitive radios:<sp count="4"/>
					<region region-id="6563" left="129.6" top="135" width="27.6" height="12.6" align-x="144" align-y="144" show-border="false" show-highlight="true" is-protected="true" z-order="0" background-color="inherit" tag="">
						<math optimize="false" disable-calc="false">
							<ml:define xmlns:ml="http://schemas.mathsoft.com/math30">
								<ml:id xml:space="preserve">m</ml:id>
								<ml:real>6</ml:real>
							</ml:define>
						</math>
						<rendering item-idref="2"/>
					</region>
				</p>
			</text>
		</region>
		<region region-id="1466" left="6" top="158.4" width="271.8" height="13.2" align-x="21.6" align-y="168" show-border="false" show-highlight="false" is-protected="true" z-order="0" background-color="inherit" tag="">
			<text use-page-width="false" push-down="false" lock-width="true">
				<p style="Normal" margin-left="inherit" margin-right="inherit" text-indent="inherit" text-align="inherit" list-style-type="inherit" tabs="inherit">Number of m-element sample vectors:<sp count="3"/>
					<region region-id="6562" left="170.4" top="159" width="30" height="12.6" align-x="182.4" align-y="168" show-border="false" show-highlight="true" is-protected="true" z-order="0" background-color="inherit" tag="">
						<math optimize="false" disable-calc="false">
							<ml:define xmlns:ml="http://schemas.mathsoft.com/math30">
								<ml:id xml:space="preserve">n</ml:id>
								<ml:real>50</ml:real>
							</ml:define>
						</math>
						<rendering item-idref="3"/>
					</region>
					<sp count="9"/>
				</p>
			</text>
		</region>
		<region region-id="6560" left="6" top="182.4" width="144.6" height="13.2" align-x="21.6" align-y="192" show-border="false" show-highlight="false" is-protected="true" z-order="0" background-color="inherit" tag="">
			<text use-page-width="false" push-down="false" lock-width="false">
				<p style="Normal" margin-left="inherit" margin-right="inherit" text-indent="inherit" text-align="inherit" list-style-type="inherit" tabs="inherit">Number of primary radios:<sp count="4"/>
					<region region-id="6561" left="123.6" top="183" width="26.4" height="12.6" align-x="136.8" align-y="192" show-border="false" show-highlight="true" is-protected="true" z-order="0" background-color="inherit" tag="">
						<math optimize="false" disable-calc="false">
							<ml:define xmlns:ml="http://schemas.mathsoft.com/math30">
								<ml:id xml:space="preserve">p</ml:id>
								<ml:real>1</ml:real>
							</ml:define>
						</math>
						<rendering item-idref="4"/>
					</region>
				</p>
			</text>
		</region>
		<region region-id="6581" left="6" top="206.4" width="269.4" height="16.8" align-x="21.6" align-y="216" show-border="false" show-highlight="false" is-protected="true" z-order="0" background-color="inherit" tag="">
			<text use-page-width="false" push-down="false" lock-width="false">
				<p style="Normal" margin-left="inherit" margin-right="inherit" text-indent="inherit" text-align="inherit" list-style-type="inherit" tabs="inherit">Number of quantization levels of the ADCs (Re and Im):<sp count="4"/>
					<region region-id="5167" left="242.4" top="207" width="32.4" height="16.2" align-x="261.6" align-y="216" show-border="false" show-highlight="true" is-protected="true" z-order="0" background-color="inherit" tag="">
						<math optimize="false" disable-calc="false">
							<ml:define xmlns:ml="http://schemas.mathsoft.com/math30">
								<ml:id xml:space="preserve" subscript="q">N</ml:id>
								<ml:real>8</ml:real>
							</ml:define>
						</math>
						<rendering item-idref="5"/>
					</region>
				</p>
			</text>
		</region>
		<region region-id="6582" left="6" top="230.4" width="231.6" height="13.2" align-x="23.4" align-y="240" show-border="false" show-highlight="false" is-protected="true" z-order="0" background-color="inherit" tag="">
			<text use-page-width="false" push-down="false" lock-width="false">
				<p style="Normal" margin-left="inherit" margin-right="inherit" text-indent="inherit" text-align="inherit" list-style-type="inherit" tabs="inherit">Dynamic range of the ADCs (Re and Im):<sp count="3"/>
					<region region-id="3591" left="181.8" top="231" width="27.6" height="12.6" align-x="196.2" align-y="240" show-border="false" show-highlight="true" is-protected="true" z-order="0" background-color="inherit" tag="">
						<math optimize="false" disable-calc="false">
							<ml:define xmlns:ml="http://schemas.mathsoft.com/math30">
								<ml:id xml:space="preserve">D</ml:id>
								<ml:real>2</ml:real>
							</ml:define>
						</math>
						<rendering item-idref="6"/>
					</region>
					<sp count="2"/>Volts.</p>
			</text>
		</region>
		<region region-id="6584" left="6" top="254.4" width="142.8" height="16.8" align-x="15.6" align-y="264" show-border="false" show-highlight="false" is-protected="true" z-order="0" background-color="inherit" tag="">
			<text use-page-width="false" push-down="false" lock-width="false">
				<p style="Normal" margin-left="0" margin-right="0" text-indent="inherit" text-align="left" list-style-type="inherit" tabs="inherit">ADC overdrive factor:<sp count="4"/>
					<region region-id="6583" left="105.6" top="255" width="42.6" height="16.2" align-x="127.8" align-y="264" show-border="false" show-highlight="true" is-protected="true" z-order="0" background-color="inherit" tag="">
						<math optimize="false" disable-calc="false">
							<ml:define xmlns:ml="http://schemas.mathsoft.com/math30">
								<ml:id xml:space="preserve" subscript="od">f</ml:id>
								<ml:real>1.2</ml:real>
							</ml:define>
						</math>
						<rendering item-idref="7"/>
					</region>
				</p>
			</text>
		</region>
		<region region-id="6585" left="6" top="278.4" width="434.4" height="13.2" align-x="19.8" align-y="288" show-border="false" show-highlight="false" is-protected="true" z-order="0" background-color="inherit" tag="">
			<text use-page-width="false" push-down="false" lock-width="true">
				<p style="Normal" margin-left="inherit" margin-right="inherit" text-indent="inherit" text-align="inherit" list-style-type="inherit" tabs="inherit">Lenght of the impulse reponse of the low-pass receive filter at the CR:<sp count="4"/>
					<region region-id="29" left="301.8" top="279" width="31.2" height="12.6" align-x="315" align-y="288" show-border="false" show-highlight="true" is-protected="true" z-order="0" background-color="inherit" tag="">
						<math optimize="false" disable-calc="false">
							<ml:define xmlns:ml="http://schemas.mathsoft.com/math30">
								<ml:id xml:space="preserve">L</ml:id>
								<ml:real>10</ml:real>
							</ml:define>
						</math>
						<rendering item-idref="8"/>
					</region>
					<sp count="2"/>
				</p>
			</text>
		</region>
		<region region-id="6586" left="6" top="302.4" width="466.8" height="15" align-x="16.8" align-y="312" show-border="false" show-highlight="false" is-protected="true" z-order="0" background-color="inherit" tag="">
			<text use-page-width="false" push-down="false" lock-width="false">
				<p style="Normal" margin-left="inherit" margin-right="inherit" text-indent="inherit" text-align="inherit" list-style-type="inherit" tabs="inherit">Vector with the impulse response of the receive filter (default: moving average filter, hi = 1):<sp count="3"/>
					<region region-id="5446" left="384.6" top="303" width="52.2" height="12.6" align-x="394.2" align-y="312" show-border="false" show-highlight="false" is-protected="true" z-order="0" background-color="inherit" tag="">
						<math optimize="false" disable-calc="false">
							<ml:define xmlns:ml="http://schemas.mathsoft.com/math30">
								<ml:id xml:space="preserve">i</ml:id>
								<ml:range>
									<ml:real>0</ml:real>
									<ml:apply>
										<ml:minus/>
										<ml:id xml:space="preserve">L</ml:id>
										<ml:real>1</ml:real>
									</ml:apply>
								</ml:range>
							</ml:define>
						</math>
						<rendering item-idref="9"/>
					</region>
					<sp count="3"/>
					<region region-id="5445" left="444.6" top="303" width="27.6" height="14.4" align-x="459" align-y="312" show-border="false" show-highlight="true" is-protected="true" z-order="0" background-color="inherit" tag="">
						<math optimize="false" disable-calc="false">
							<ml:define xmlns:ml="http://schemas.mathsoft.com/math30">
								<ml:apply>
									<ml:indexer/>
									<ml:id xml:space="preserve">h</ml:id>
									<ml:id xml:space="preserve">i</ml:id>
								</ml:apply>
								<ml:real>1</ml:real>
							</ml:define>
						</math>
						<rendering item-idref="10"/>
					</region>
				</p>
			</text>
		</region>
		<region region-id="6587" left="6" top="351" width="154.2" height="11.4" align-x="30.6" align-y="360" show-border="false" show-highlight="false" is-protected="true" z-order="0" background-color="inherit" tag="">
			<text use-page-width="false" push-down="false" lock-width="false">
				<p style="Normal" margin-left="inherit" margin-right="inherit" text-indent="inherit" text-align="inherit" list-style-type="inherit" tabs="inherit">
					<b>IMPULSIVE NOISE PARAMETERS</b>
				</p>
			</text>
		</region>
		<region region-id="6588" left="6" top="374.4" width="435.6" height="16.8" align-x="21.6" align-y="384" show-border="false" show-highlight="false" is-protected="true" z-order="0" background-color="inherit" tag="">
			<text use-page-width="false" push-down="false" lock-width="true">
				<p style="Normal" margin-left="0" margin-right="0" text-indent="inherit" text-align="left" list-style-type="inherit" tabs="inherit">Number of impulsive noise (IN) bursts during one sensing period (default: 1)<sp count="4"/>
					<region region-id="389" left="326.4" top="375" width="32.4" height="16.2" align-x="345.6" align-y="384" show-border="false" show-highlight="true" is-protected="true" z-order="0" background-color="inherit" tag="">
						<math optimize="false" disable-calc="false">
							<ml:define xmlns:ml="http://schemas.mathsoft.com/math30">
								<ml:id xml:space="preserve" subscript="b">N</ml:id>
								<ml:real>1</ml:real>
							</ml:define>
						</math>
						<rendering item-idref="11"/>
					</region>
				</p>
			</text>
		</region>
		<region region-id="6589" left="6" top="398.4" width="360.6" height="16.8" align-x="21.6" align-y="408" show-border="false" show-highlight="false" is-protected="true" z-order="0" background-color="inherit" tag="">
			<text use-page-width="false" push-down="false" lock-width="true">
				<p style="Normal" margin-left="0" margin-right="0" text-indent="inherit" text-align="left" list-style-type="inherit" tabs="inherit">Number of samples per IN burst (default: 20% of n):<sp count="4"/>
					<region region-id="378" left="226.2" top="399" width="36" height="16.2" align-x="244.2" align-y="408" show-border="false" show-highlight="true" is-protected="true" z-order="0" background-color="inherit" tag="">
						<math optimize="false" disable-calc="false">
							<ml:define xmlns:ml="http://schemas.mathsoft.com/math30">
								<ml:id xml:space="preserve" subscript="s">N</ml:id>
								<ml:real>10</ml:real>
							</ml:define>
						</math>
						<rendering item-idref="12"/>
					</region>
				</p>
			</text>
		</region>
		<region region-id="6590" left="6" top="422.4" width="321" height="13.2" align-x="16.2" align-y="432" show-border="false" show-highlight="false" is-protected="true" z-order="0" background-color="inherit" tag="">
			<text use-page-width="false" push-down="false" lock-width="false">
				<p style="Normal" margin-left="inherit" margin-right="inherit" text-indent="inherit" text-align="inherit" list-style-type="inherit" tabs="inherit">Ratio betwen impulsive and thermal noise powers (K = 0 for zero IN):<sp count="4"/>
					<region region-id="6558" left="298.2" top="423" width="28.2" height="12.6" align-x="313.2" align-y="432" show-border="false" show-highlight="true" is-protected="true" z-order="0" background-color="inherit" tag="">
						<math optimize="false" disable-calc="false">
							<ml:define xmlns:ml="http://schemas.mathsoft.com/math30">
								<ml:id xml:space="preserve">K</ml:id>
								<ml:real>1</ml:real>
							</ml:define>
						</math>
						<rendering item-idref="13"/>
					</region>
				</p>
			</text>
		</region>
		<region region-id="6591" left="6" top="446.4" width="281.4" height="16.8" align-x="6" align-y="456" show-border="false" show-highlight="false" is-protected="true" z-order="0" background-color="inherit" tag="">
			<text use-page-width="false" push-down="false" lock-width="false">
				<p style="Normal" margin-left="inherit" margin-right="inherit" text-indent="0" text-align="inherit" list-style-type="none" tabs="inherit">Probability of occurrence of IN during a sensing period:<sp count="3"/>
					<region region-id="6565" left="240" top="447" width="44.4" height="16.2" align-x="264" align-y="456" show-border="false" show-highlight="true" is-protected="true" z-order="0" background-color="inherit" tag="">
						<math optimize="false" disable-calc="false">
							<ml:define xmlns:ml="http://schemas.mathsoft.com/math30">
								<ml:id xml:space="preserve" subscript="IN">p</ml:id>
								<ml:real>0.8</ml:real>
							</ml:define>
						</math>
						<rendering item-idref="14"/>
					</region>
					<sp/>
				</p>
			</text>
		</region>
		<region region-id="6592" left="6" top="470.4" width="192.6" height="16.8" align-x="6" align-y="480" show-border="false" show-highlight="false" is-protected="true" z-order="0" background-color="inherit" tag="">
			<text use-page-width="false" push-down="false" lock-width="false">
				<p style="Normal" margin-left="inherit" margin-right="inherit" text-indent="0" text-align="inherit" list-style-type="none" tabs="inherit">Average fraction of CRs hit by IN:<sp count="4"/>
					<region region-id="6567" left="152.4" top="471" width="45.6" height="16.2" align-x="177.6" align-y="480" show-border="false" show-highlight="true" is-protected="true" z-order="0" background-color="inherit" tag="">
						<math optimize="false" disable-calc="false">
							<ml:define xmlns:ml="http://schemas.mathsoft.com/math30">
								<ml:id xml:space="preserve" subscript="CR">p</ml:id>
								<ml:real>0.7</ml:real>
							</ml:define>
						</math>
						<rendering item-idref="15"/>
					</region>
				</p>
			</text>
		</region>
		<region region-id="6594" left="6" top="519" width="128.4" height="11.4" align-x="34.2" align-y="528" show-border="false" show-highlight="false" is-protected="true" z-order="0" background-color="inherit" tag="">
			<text use-page-width="false" push-down="false" lock-width="false">
				<p style="Normal" margin-left="inherit" margin-right="inherit" text-indent="inherit" text-align="inherit" list-style-type="inherit" tabs="inherit">
					<b>SIMULATION PARAMETERS</b>
				</p>
			</text>
		</region>
		<region region-id="6569" left="6" top="542.4" width="259.2" height="16.8" align-x="21.6" align-y="552" show-border="false" show-highlight="false" is-protected="true" z-order="0" background-color="inherit" tag="">
			<text use-page-width="false" push-down="false" lock-width="false">
				<p style="Normal" margin-left="inherit" margin-right="inherit" text-indent="inherit" text-align="inherit" list-style-type="inherit" tabs="inherit">Number of runs in the Monte Carlo simulation:<sp count="5"/>
					<region region-id="6568" left="205.8" top="543" width="58.8" height="16.2" align-x="237" align-y="552" show-border="false" show-highlight="true" is-protected="true" z-order="0" background-color="inherit" tag="">
						<math optimize="false" disable-calc="false">
							<ml:define xmlns:ml="http://schemas.mathsoft.com/math30">
								<ml:id xml:space="preserve" subscript="runs">N</ml:id>
								<ml:real>1000</ml:real>
							</ml:define>
						</math>
						<rendering item-idref="16"/>
					</region>
				</p>
			</text>
		</region>
		<region region-id="6596" left="6" top="572.4" width="480.6" height="45.6" align-x="21.6" align-y="582" show-border="true" show-highlight="false" is-protected="true" z-order="0" background-color="inherit" tag="">
			<text use-page-width="false" push-down="false" lock-width="true">
				<p style="Normal" margin-left="0" margin-right="0" text-indent="inherit" text-align="left" list-style-type="inherit" tabs="inherit">Detection technique:<sp count="4"/>
					<region region-id="6595" left="100.8" top="573" width="84" height="12.6" align-x="145.8" align-y="582" show-border="false" show-highlight="true" is-protected="true" z-order="0" background-color="inherit" tag="">
						<math optimize="false" disable-calc="false">
							<ml:define xmlns:ml="http://schemas.mathsoft.com/math30">
								<ml:id xml:space="preserve">Detection</ml:id>
								<ml:str xml:space="preserve">GLRT</ml:str>
							</ml:define>
						</math>
						<rendering item-idref="17"/>
					</region>
				</p>
				<p style="Normal" margin-left="0" margin-right="0" text-indent="inherit" text-align="left" list-style-type="inherit" tabs="inherit">Options:</p>
				<p style="Normal" margin-left="0" margin-right="0" text-indent="inherit" text-align="left" list-style-type="inherit" tabs="inherit">"ED" (Energy Detection), "ERD" (Eigenvalue Ratio Detection), "RLRT" (Roy's Largest Root Test), "GLRT" (Generalized Likelihood Ratio Test). The last three are adequate for p = 1.</p>
			</text>
		</region>
		<region region-id="4657" left="6" top="638.4" width="478.8" height="49.2" align-x="21.6" align-y="648" show-border="true" show-highlight="false" is-protected="true" z-order="0" background-color="inherit" tag="">
			<text use-page-width="false" push-down="false" lock-width="true">
				<p style="Normal" margin-left="inherit" margin-right="inherit" text-indent="inherit" text-align="inherit" list-style-type="inherit" tabs="inherit">Primary transmitted signal:<sp count="4"/>
					<region region-id="6597" left="126" top="639" width="57" height="16.2" align-x="145.8" align-y="648" show-border="false" show-highlight="true" is-protected="true" z-order="0" background-color="inherit" tag="">
						<math optimize="false" disable-calc="false">
							<ml:define xmlns:ml="http://schemas.mathsoft.com/math30">
								<ml:id xml:space="preserve" subscript="tx">S</ml:id>
								<ml:str xml:space="preserve">Noise</ml:str>
							</ml:define>
						</math>
						<rendering item-idref="18"/>
					</region>
				</p>
				<p style="Normal" margin-left="inherit" margin-right="inherit" text-indent="inherit" text-align="inherit" list-style-type="inherit" tabs="inherit">Options:</p>
				<p style="Normal" margin-left="inherit" margin-right="inherit" text-indent="inherit" text-align="inherit" list-style-type="inherit" tabs="inherit">"Noise" (X have filtered noise samples, depending on the RX filter lenght, L).</p>
				<p style="Normal" margin-left="inherit" margin-right="inherit" text-indent="inherit" text-align="inherit" list-style-type="inherit" tabs="inherit">"BPSKiid" (X have filtered BPSK samples, depending on the RX filter lenght, L).</p>
			</text>
		</region>
		<region region-id="4658" left="6" top="710.4" width="222" height="45.6" align-x="21.6" align-y="720" show-border="true" show-highlight="false" is-protected="true" z-order="0" background-color="inherit" tag="">
			<text use-page-width="false" push-down="false" lock-width="true">
				<p style="Normal" margin-left="inherit" margin-right="inherit" text-indent="inherit" text-align="inherit" list-style-type="inherit" tabs="inherit">System model to be analyzed:<sp count="4"/>
					<region region-id="6598" left="139.8" top="711" width="54.6" height="12.6" align-x="172.2" align-y="720" show-border="false" show-highlight="true" is-protected="true" z-order="0" background-color="inherit" tag="">
						<math optimize="false" disable-calc="false">
							<ml:define xmlns:ml="http://schemas.mathsoft.com/math30">
								<ml:id xml:space="preserve">Model</ml:id>
								<ml:str xml:space="preserve">C</ml:str>
							</ml:define>
						</math>
						<rendering item-idref="19"/>
					</region>
				</p>
				<p style="Normal" margin-left="inherit" margin-right="inherit" text-indent="inherit" text-align="inherit" list-style-type="inherit" tabs="inherit">Options:</p>
				<p style="Normal" margin-left="inherit" margin-right="inherit" text-indent="inherit" text-align="inherit" list-style-type="inherit" tabs="inherit">"C" (conventional model)</p>
				<p style="Normal" margin-left="inherit" margin-right="inherit" text-indent="inherit" text-align="inherit" list-style-type="inherit" tabs="inherit">"R" (realistic, implementation-oriented model)</p>
			</text>
		</region>
		<region region-id="6344" left="6" top="776.4" width="319.2" height="60" align-x="20.4" align-y="786" show-border="true" show-highlight="false" is-protected="true" z-order="0" background-color="inherit" tag="">
			<text use-page-width="false" push-down="false" lock-width="true">
				<p style="Normal" margin-left="0" margin-right="0" text-indent="inherit" text-align="left" list-style-type="inherit" tabs="inherit">Impulsive noise countermeasure:<sp count="4"/>
					<region region-id="6599" left="151.2" top="777" width="102" height="16.2" align-x="230.4" align-y="786" show-border="false" show-highlight="true" is-protected="true" z-order="0" background-color="inherit" tag="">
						<math optimize="false" disable-calc="false">
							<ml:define xmlns:ml="http://schemas.mathsoft.com/math30">
								<ml:id xml:space="preserve" subscript="countermeasure">IN</ml:id>
								<ml:str xml:space="preserve">N</ml:str>
							</ml:define>
						</math>
						<rendering item-idref="20"/>
					</region>
				</p>
				<p style="Normal" margin-left="0" margin-right="0" text-indent="inherit" text-align="left" list-style-type="inherit" tabs="inherit">Options:</p>
				<p style="Normal" margin-left="inherit" margin-right="inherit" text-indent="inherit" text-align="inherit" list-style-type="inherit" tabs="inherit">"M" (mute samples above +-D/2 when IN is present).</p>
				<p style="Normal" margin-left="0" margin-right="0" text-indent="inherit" text-align="left" list-style-type="inherit" tabs="inherit">"E" (eliminate from cooperation those CRs under IN).</p>
				<p style="Normal" margin-left="inherit" margin-right="inherit" text-indent="inherit" text-align="inherit" list-style-type="inherit" tabs="inherit">"N" (no IN-specific countermeasure at all).</p>
			</text>
		</region>
		<region region-id="6845" left="6" top="854.4" width="170.4" height="13.2" align-x="6" align-y="864" show-border="false" show-highlight="false" is-protected="true" z-order="0" background-color="inherit" tag="">
			<text use-page-width="false" push-down="false" lock-width="true">
				<p style="Normal" margin-left="inherit" margin-right="inherit" text-indent="0" text-align="inherit" list-style-type="none" tabs="inherit">
					<inlineAttr font-weight="normal">Signal-to-noise ratio, in dB:<sp count="4"/>
					</inlineAttr>
					<region region-id="6839" left="128.4" top="855" width="47.4" height="12.6" align-x="152.4" align-y="864" show-border="false" show-highlight="true" is-protected="true" z-order="0" background-color="inherit" tag="">
						<math optimize="false" disable-calc="false">
							<ml:define xmlns:ml="http://schemas.mathsoft.com/math30">
								<ml:id xml:space="preserve">SNR</ml:id>
								<ml:real>-10</ml:real>
							</ml:define>
						</math>
						<rendering item-idref="21"/>
					</region>
				</p>
			</text>
		</region>
		<region region-id="6846" left="6" top="878.4" width="196.8" height="16.8" align-x="6" align-y="888" show-border="false" show-highlight="false" is-protected="true" z-order="0" background-color="inherit" tag="">
			<text use-page-width="false" push-down="false" lock-width="true">
				<p style="Normal" margin-left="inherit" margin-right="inherit" text-indent="0" text-align="inherit" list-style-type="none" tabs="inherit">
					<inlineAttr font-weight="normal">Number of points in the ROC curve:<sp count="4"/>
					</inlineAttr>
					<region region-id="6841" left="161.4" top="879" width="40.8" height="16.2" align-x="184.2" align-y="888" show-border="false" show-highlight="true" is-protected="true" z-order="0" background-color="inherit" tag="">
						<math optimize="false" disable-calc="false">
							<ml:define xmlns:ml="http://schemas.mathsoft.com/math30">
								<ml:id xml:space="preserve" subscript="pt">N</ml:id>
								<ml:real>10</ml:real>
							</ml:define>
						</math>
						<rendering item-idref="22"/>
					</region>
				</p>
			</text>
		</region>
		<region region-id="6847" left="6" top="902.4" width="484.2" height="16.8" align-x="6" align-y="912" show-border="false" show-highlight="false" is-protected="true" z-order="0" background-color="inherit" tag="">
			<text use-page-width="false" push-down="false" lock-width="true">
				<p style="Normal" margin-left="inherit" margin-right="inherit" text-indent="0" text-align="inherit" list-style-type="none" tabs="inherit">
					<inlineAttr font-weight="normal">Minimum and maximum detection thresholds, respectively:<sp count="4"/>
					</inlineAttr>
					<region region-id="6843" left="256.2" top="903" width="48" height="16.2" align-x="283.8" align-y="912" show-border="false" show-highlight="true" is-protected="true" z-order="0" background-color="inherit" tag="">
						<math optimize="false" disable-calc="false">
							<ml:define xmlns:ml="http://schemas.mathsoft.com/math30">
								<ml:id xml:space="preserve" subscript="min">γ</ml:id>
								<ml:real>1.3</ml:real>
							</ml:define>
						</math>
						<rendering item-idref="23"/>
					</region>
					<f family="Arial" charset="0" size="10">
						<inlineAttr font-weight="normal" font-style="normal" underline="false" line-through="false">
							<sp count="4"/>
						</inlineAttr>
					</f>
					<region region-id="6844" left="314.4" top="903" width="50.4" height="16.2" align-x="344.4" align-y="912" show-border="false" show-highlight="true" is-protected="true" z-order="0" background-color="inherit" tag="">
						<math optimize="false" disable-calc="false">
							<ml:define xmlns:ml="http://schemas.mathsoft.com/math30">
								<ml:id xml:space="preserve" subscript="max">γ</ml:id>
								<ml:real>2.1</ml:real>
							</ml:define>
						</math>
						<rendering item-idref="24"/>
					</region>
				</p>
			</text>
		</region>
		<region region-id="6852" left="0" top="964.8" width="4806.6" align-x="0" align-y="964.8" show-border="false" show-highlight="true" is-protected="true" z-order="0" background-color="#ffff80" tag="" height="4590.6">
			<area is-collapsed="true" name=" MAIN ROUTINE (double click to expand/compress)" show-name="true" show-border="true" show-icon="true" show-timestamp="true" allow-expand="false" is-locked="false" timestamp="" top-lock-id="6820" bottom-lock-id="5116">
				<region region-id="5450" left="6" top="33.6" width="190.2" height="11.4" align-x="26.4" align-y="42.6" show-border="false" show-highlight="false" is-protected="true" z-order="0" background-color="inherit" tag="">
					<text use-page-width="false" push-down="false" lock-width="false">
						<p style="Normal" margin-left="inherit" margin-right="inherit" text-indent="inherit" text-align="inherit" list-style-type="inherit" tabs="inherit">
							<f family="Arial" charset="0">
								<b>
									<inlineAttr line-through="false">Auxiliary routine for the whitening filtering</inlineAttr>
								</b>
							</f>
						</p>
					</text>
				</region>
				<region region-id="5467" left="48" top="63" width="133.8" height="27" align-x="76.2" align-y="78.6" show-border="false" show-highlight="false" is-protected="true" z-order="0" background-color="inherit" tag="">
					<math optimize="false" disable-calc="false">
						<ml:define xmlns:ml="http://schemas.mathsoft.com/math30">
							<ml:id xml:space="preserve">Conv</ml:id>
							<ml:apply>
								<ml:id xml:space="preserve">Re</ml:id>
								<ml:apply>
									<ml:div/>
									<ml:apply>
										<ml:id xml:space="preserve">convol</ml:id>
										<ml:sequence>
											<ml:id xml:space="preserve">h</ml:id>
											<ml:id xml:space="preserve">h</ml:id>
										</ml:sequence>
									</ml:apply>
									<ml:apply>
										<ml:id xml:space="preserve">max</ml:id>
										<ml:apply>
											<ml:id xml:space="preserve">convol</ml:id>
											<ml:sequence>
												<ml:id xml:space="preserve">h</ml:id>
												<ml:id xml:space="preserve">h</ml:id>
											</ml:sequence>
										</ml:apply>
									</ml:apply>
								</ml:apply>
							</ml:apply>
						</ml:define>
					</math>
				</region>
				<region region-id="5468" left="48" top="99.6" width="121.8" height="14.4" align-x="94.8" align-y="108.6" show-border="false" show-highlight="false" is-protected="true" z-order="0" background-color="inherit" tag="">
					<math optimize="false" disable-calc="false">
						<ml:define xmlns:ml="http://schemas.mathsoft.com/math30">
							<ml:id xml:space="preserve">IndexMax</ml:id>
							<ml:apply>
								<ml:indexer/>
								<ml:apply>
									<ml:id xml:space="preserve">match</ml:id>
									<ml:sequence>
										<ml:real>1</ml:real>
										<ml:id xml:space="preserve">Conv</ml:id>
									</ml:sequence>
								</ml:apply>
								<ml:real>0</ml:real>
							</ml:apply>
						</ml:define>
					</math>
				</region>
				<region region-id="5469" left="48" top="123.6" width="243" height="12.6" align-x="74.4" align-y="132.6" show-border="false" show-highlight="false" is-protected="true" z-order="0" background-color="inherit" tag="">
					<math optimize="false" disable-calc="false">
						<ml:define xmlns:ml="http://schemas.mathsoft.com/math30">
							<ml:id xml:space="preserve">Corr</ml:id>
							<ml:apply>
								<ml:id xml:space="preserve">submatrix</ml:id>
								<ml:sequence>
									<ml:id xml:space="preserve">Conv</ml:id>
									<ml:id xml:space="preserve">IndexMax</ml:id>
									<ml:apply>
										<ml:minus/>
										<ml:apply>
											<ml:plus/>
											<ml:id xml:space="preserve">IndexMax</ml:id>
											<ml:id xml:space="preserve">L</ml:id>
										</ml:apply>
										<ml:real>1</ml:real>
									</ml:apply>
									<ml:real>0</ml:real>
									<ml:real>0</ml:real>
								</ml:sequence>
							</ml:apply>
						</ml:define>
					</math>
				</region>
				<region region-id="5470" left="48" top="147.6" width="54" height="14.4" align-x="88.8" align-y="156.6" show-border="false" show-highlight="false" is-protected="true" z-order="0" background-color="inherit" tag="">
					<math optimize="false" disable-calc="false">
						<ml:define xmlns:ml="http://schemas.mathsoft.com/math30">
							<ml:apply>
								<ml:indexer/>
								<ml:id xml:space="preserve">Corr</ml:id>
								<ml:apply>
									<ml:minus/>
									<ml:id xml:space="preserve">n</ml:id>
									<ml:real>1</ml:real>
								</ml:apply>
							</ml:apply>
							<ml:real>0</ml:real>
						</ml:define>
					</math>
				</region>
				<region region-id="5471" left="48" top="171.6" width="51" height="12.6" align-x="57.6" align-y="180.6" show-border="false" show-highlight="false" is-protected="true" z-order="0" background-color="inherit" tag="">
					<math optimize="false" disable-calc="false">
						<ml:define xmlns:ml="http://schemas.mathsoft.com/math30">
							<ml:id xml:space="preserve">i</ml:id>
							<ml:range>
								<ml:real>0</ml:real>
								<ml:apply>
									<ml:minus/>
									<ml:id xml:space="preserve">n</ml:id>
									<ml:real>1</ml:real>
								</ml:apply>
							</ml:range>
						</ml:define>
					</math>
				</region>
				<region region-id="5472" left="48" top="195.6" width="22.8" height="12.6" align-x="60" align-y="204.6" show-border="false" show-highlight="false" is-protected="true" z-order="0" background-color="inherit" tag="">
					<math optimize="false" disable-calc="false">
						<ml:define xmlns:ml="http://schemas.mathsoft.com/math30">
							<ml:id xml:space="preserve">j</ml:id>
							<ml:id xml:space="preserve">i</ml:id>
						</ml:define>
					</math>
				</region>
				<region region-id="5473" left="48" top="219.6" width="97.8" height="31.2" align-x="62.4" align-y="228.6" show-border="false" show-highlight="false" is-protected="true" z-order="0" background-color="inherit" tag="">
					<math optimize="false" disable-calc="false">
						<ml:define xmlns:ml="http://schemas.mathsoft.com/math30">
							<ml:apply>
								<ml:indexer/>
								<ml:id xml:space="preserve">q</ml:id>
								<ml:id xml:space="preserve">i</ml:id>
							</ml:apply>
							<ml:program>
								<ml:ifThen>
									<ml:apply>
										<ml:lessOrEqual/>
										<ml:id xml:space="preserve">i</ml:id>
										<ml:id xml:space="preserve">L</ml:id>
									</ml:apply>
									<ml:apply>
										<ml:indexer/>
										<ml:id xml:space="preserve">Corr</ml:id>
										<ml:id xml:space="preserve">i</ml:id>
									</ml:apply>
								</ml:ifThen>
								<ml:otherwise>
									<ml:real>0</ml:real>
								</ml:otherwise>
							</ml:program>
						</ml:define>
					</math>
				</region>
				<region region-id="5474" left="48" top="267.6" width="60" height="14.4" align-x="73.8" align-y="276.6" show-border="false" show-highlight="false" is-protected="true" z-order="0" background-color="inherit" tag="">
					<math optimize="false" disable-calc="false">
						<ml:define xmlns:ml="http://schemas.mathsoft.com/math30">
							<ml:apply>
								<ml:indexer/>
								<ml:id xml:space="preserve">Q</ml:id>
								<ml:sequence>
									<ml:id xml:space="preserve">i</ml:id>
									<ml:id xml:space="preserve">j</ml:id>
								</ml:sequence>
							</ml:apply>
							<ml:apply>
								<ml:indexer/>
								<ml:id xml:space="preserve">q</ml:id>
								<ml:apply>
									<ml:absval/>
									<ml:apply>
										<ml:minus/>
										<ml:id xml:space="preserve">i</ml:id>
										<ml:id xml:space="preserve">j</ml:id>
									</ml:apply>
								</ml:apply>
							</ml:apply>
						</ml:define>
					</math>
				</region>
				<region region-id="5475" left="48" top="297.6" width="168.6" height="12.6" align-x="63.6" align-y="306.6" show-border="false" show-highlight="false" is-protected="true" z-order="0" background-color="inherit" tag="">
					<math optimize="false" disable-calc="false">
						<ml:define xmlns:ml="http://schemas.mathsoft.com/math30">
							<ml:id xml:space="preserve">U</ml:id>
							<ml:apply>
								<ml:id xml:space="preserve">submatrix</ml:id>
								<ml:sequence>
									<ml:apply>
										<ml:id xml:space="preserve">svd</ml:id>
										<ml:id xml:space="preserve">Q</ml:id>
									</ml:apply>
									<ml:real>0</ml:real>
									<ml:apply>
										<ml:minus/>
										<ml:id xml:space="preserve">n</ml:id>
										<ml:real>1</ml:real>
									</ml:apply>
									<ml:real>0</ml:real>
									<ml:apply>
										<ml:minus/>
										<ml:id xml:space="preserve">n</ml:id>
										<ml:real>1</ml:real>
									</ml:apply>
								</ml:sequence>
							</ml:apply>
						</ml:define>
					</math>
				</region>
				<region region-id="5476" left="48" top="321.6" width="70.2" height="12.6" align-x="62.4" align-y="330.6" show-border="false" show-highlight="false" is-protected="true" z-order="0" background-color="inherit" tag="">
					<math optimize="false" disable-calc="false">
						<ml:define xmlns:ml="http://schemas.mathsoft.com/math30">
							<ml:id xml:space="preserve">C</ml:id>
							<ml:apply>
								<ml:id xml:space="preserve">cholesky</ml:id>
								<ml:id xml:space="preserve">Q</ml:id>
							</ml:apply>
						</ml:define>
					</math>
				</region>
				<region region-id="5477" left="48" top="340.8" width="64.2" height="21" align-x="74.4" align-y="354.6" show-border="false" show-highlight="false" is-protected="true" z-order="0" background-color="inherit" tag="">
					<math optimize="false" disable-calc="false">
						<ml:define xmlns:ml="http://schemas.mathsoft.com/math30">
							<ml:id xml:space="preserve" subscript="wf">W</ml:id>
							<ml:apply>
								<ml:mult/>
								<ml:id xml:space="preserve">U</ml:id>
								<ml:apply>
									<ml:pow/>
									<ml:id xml:space="preserve">C</ml:id>
									<ml:real>-1</ml:real>
								</ml:apply>
							</ml:apply>
						</ml:define>
					</math>
				</region>
				<region region-id="5464" left="6" top="387.6" width="301.8" height="11.4" align-x="21" align-y="396.6" show-border="false" show-highlight="false" is-protected="true" z-order="0" background-color="inherit" tag="">
					<text use-page-width="false" push-down="false" lock-width="true">
						<p style="Normal" margin-left="0" margin-right="0" text-indent="inherit" text-align="left" list-style-type="inherit" tabs="inherit">
							<b>Auxiliary routine for the r</b>
							<f family="Arial" charset="0">
								<b>
									<inlineAttr line-through="false">eceive filter as a Toeplitz matrix</inlineAttr>
								</b>
							</f>
						</p>
					</text>
				</region>
				<region region-id="5466" left="42" top="411.6" width="130.8" height="100.2" align-x="67.8" align-y="420.6" show-border="false" show-highlight="false" is-protected="true" z-order="0" background-color="inherit" tag="">
					<math optimize="false" disable-calc="false">
						<ml:define xmlns:ml="http://schemas.mathsoft.com/math30">
							<ml:id xml:space="preserve" subscript="ma">F</ml:id>
							<ml:program>
								<ml:for>
									<ml:id xml:space="preserve">j</ml:id>
									<ml:range>
										<ml:real>0</ml:real>
										<ml:apply>
											<ml:minus/>
											<ml:id xml:space="preserve">L</ml:id>
											<ml:real>1</ml:real>
										</ml:apply>
									</ml:range>
									<ml:localDefine>
										<ml:apply>
											<ml:indexer/>
											<ml:id xml:space="preserve">F</ml:id>
											<ml:sequence>
												<ml:id xml:space="preserve">j</ml:id>
												<ml:real>0</ml:real>
											</ml:sequence>
										</ml:apply>
										<ml:apply>
											<ml:indexer/>
											<ml:id xml:space="preserve">h</ml:id>
											<ml:id xml:space="preserve">j</ml:id>
										</ml:apply>
									</ml:localDefine>
								</ml:for>
								<ml:for>
									<ml:id xml:space="preserve">i</ml:id>
									<ml:range>
										<ml:real>1</ml:real>
										<ml:apply>
											<ml:plus/>
											<ml:apply>
												<ml:minus/>
												<ml:id xml:space="preserve">n</ml:id>
												<ml:real>2</ml:real>
											</ml:apply>
											<ml:id xml:space="preserve">L</ml:id>
										</ml:apply>
									</ml:range>
									<ml:for>
										<ml:id xml:space="preserve">j</ml:id>
										<ml:range>
											<ml:real>1</ml:real>
											<ml:apply>
												<ml:plus/>
												<ml:apply>
													<ml:minus/>
													<ml:id xml:space="preserve">n</ml:id>
													<ml:real>1</ml:real>
												</ml:apply>
												<ml:id xml:space="preserve">L</ml:id>
											</ml:apply>
										</ml:range>
										<ml:localDefine>
											<ml:apply>
												<ml:indexer/>
												<ml:id xml:space="preserve">F</ml:id>
												<ml:sequence>
													<ml:id xml:space="preserve">i</ml:id>
													<ml:id xml:space="preserve">j</ml:id>
												</ml:sequence>
											</ml:apply>
											<ml:apply>
												<ml:indexer/>
												<ml:id xml:space="preserve">F</ml:id>
												<ml:sequence>
													<ml:apply>
														<ml:minus/>
														<ml:id xml:space="preserve">i</ml:id>
														<ml:real>1</ml:real>
													</ml:apply>
													<ml:apply>
														<ml:minus/>
														<ml:id xml:space="preserve">j</ml:id>
														<ml:real>1</ml:real>
													</ml:apply>
												</ml:sequence>
											</ml:apply>
										</ml:localDefine>
									</ml:for>
								</ml:for>
								<ml:id xml:space="preserve">F</ml:id>
							</ml:program>
						</ml:define>
					</math>
				</region>
				<region region-id="6347" left="6" top="543.6" width="337.2" height="11.4" align-x="18.6" align-y="552.6" show-border="false" show-highlight="false" is-protected="true" z-order="0" background-color="inherit" tag="">
					<text use-page-width="false" push-down="false" lock-width="true">
						<p style="Normal" margin-left="0" margin-right="0" text-indent="inherit" text-align="left" list-style-type="inherit" tabs="inherit">
							<b>Auxiliary routine for the permutation matrix for vector rotation</b>
						</p>
					</text>
				</region>
				<region region-id="6605" left="48" top="573.6" width="264.6" height="38.4" align-x="87" align-y="582.6" show-border="false" show-highlight="false" is-protected="true" z-order="0" background-color="inherit" tag="">
					<math optimize="false" disable-calc="false">
						<ml:provenance expr-id="1" xmlns:ml="http://schemas.mathsoft.com/math30">
							<originRef doc-id="ECDB0157-7500-4B79-A800-71A425DC04B1" version-id="A089273C-082A-42BA-B721-644C94365D8B" branch-id="00000000-0000-0000-0000-000000000000" revision-num="448639380" is-modified="false" region-id="0" href="C:\Adionel\Pessoal\Pesquisas\Spectrum Sensing\Impulsive noise generator.xmcd" xmlns="http://schemas.mathsoft.com/provenance10">
								<hash/>
							</originRef>
							<parentRef doc-id="ECDB0157-7500-4B79-A800-71A425DC04B1" version-id="A089273C-082A-42BA-B721-644C94365D8B" branch-id="00000000-0000-0000-0000-000000000000" revision-num="448639300" is-modified="false" region-id="0" href="C:\Adionel\Pessoal\Pesquisas\Spectrum Sensing\Impulsive noise generator.xmcd" xmlns="http://schemas.mathsoft.com/provenance10">
								<hash/>
							</parentRef>
							<comment xmlns="http://schemas.mathsoft.com/provenance10"/>
							<originComment xmlns="http://schemas.mathsoft.com/provenance10"/>
							<contentHash xmlns="http://schemas.mathsoft.com/provenance10">fdf6aea3d9a0422be910cea30d4a9ca1</contentHash>
							<ml:define>
								<ml:id xml:space="preserve" subscript="matrix">R</ml:id>
								<ml:program>
									<ml:localDefine>
										<ml:id xml:space="preserve">X</ml:id>
										<ml:apply>
											<ml:id xml:space="preserve">identity</ml:id>
											<ml:id xml:space="preserve">m</ml:id>
										</ml:apply>
									</ml:localDefine>
									<ml:apply>
										<ml:id xml:space="preserve">stack</ml:id>
										<ml:sequence>
											<ml:apply>
												<ml:transpose/>
												<ml:apply>
													<ml:matcol/>
													<ml:id xml:space="preserve">X</ml:id>
													<ml:apply>
														<ml:minus/>
														<ml:id xml:space="preserve">m</ml:id>
														<ml:real>1</ml:real>
													</ml:apply>
												</ml:apply>
											</ml:apply>
											<ml:apply>
												<ml:id xml:space="preserve">submatrix</ml:id>
												<ml:sequence>
													<ml:id xml:space="preserve">X</ml:id>
													<ml:real>0</ml:real>
													<ml:apply>
														<ml:minus/>
														<ml:id xml:space="preserve">m</ml:id>
														<ml:real>2</ml:real>
													</ml:apply>
													<ml:real>0</ml:real>
													<ml:apply>
														<ml:minus/>
														<ml:id xml:space="preserve">m</ml:id>
														<ml:real>1</ml:real>
													</ml:apply>
												</ml:sequence>
											</ml:apply>
										</ml:sequence>
									</ml:apply>
								</ml:program>
							</ml:define>
						</ml:provenance>
					</math>
				</region>
				<region region-id="6685" left="6" top="651.6" width="535.8" height="11.4" align-x="6" align-y="660.6" show-border="false" show-highlight="false" is-protected="true" z-order="0" background-color="inherit" tag="">
					<text use-page-width="false" push-down="false" lock-width="true">
						<p style="Normal" margin-left="inherit" margin-right="inherit" text-indent="0" text-align="inherit" list-style-type="none" tabs="inherit">
							<b>Auxiliary routine for computing the average number of CRs in cooperation for the IN coutermeasure "E": </b>
						</p>
					</text>
				</region>
				<region region-id="6686" left="42" top="681.6" width="40.8" height="12.6" align-x="54.6" align-y="690.6" show-border="false" show-highlight="false" is-protected="true" z-order="0" background-color="inherit" tag="">
					<math optimize="false" disable-calc="false">
						<ml:provenance expr-id="1" xmlns:ml="http://schemas.mathsoft.com/math30">
							<originRef doc-id="ECDB0157-7500-4B79-A800-71A425DC04B1" version-id="FFF5DE39-E1CB-4389-87A7-59EDDD400F56" branch-id="00000000-0000-0000-0000-000000000000" revision-num="448639260" is-modified="false" region-id="0" href="C:\Adionel\Pessoal\Pesquisas\Spectrum Sensing\Impulsive noise generator.xmcd" xmlns="http://schemas.mathsoft.com/provenance10">
								<hash/>
							</originRef>
							<parentRef doc-id="ECDB0157-7500-4B79-A800-71A425DC04B1" version-id="FFF5DE39-E1CB-4389-87A7-59EDDD400F56" branch-id="00000000-0000-0000-0000-000000000000" revision-num="448639300" is-modified="false" region-id="0" href="C:\Adionel\Pessoal\Pesquisas\Spectrum Sensing\Impulsive noise generator.xmcd" xmlns="http://schemas.mathsoft.com/provenance10">
								<hash/>
							</parentRef>
							<comment xmlns="http://schemas.mathsoft.com/provenance10"/>
							<originComment xmlns="http://schemas.mathsoft.com/provenance10"/>
							<contentHash xmlns="http://schemas.mathsoft.com/provenance10">9d5c8a5710b9e67d6b16970d806411d7</contentHash>
							<ml:define>
								<ml:id xml:space="preserve">k</ml:id>
								<ml:range>
									<ml:real>0</ml:real>
									<ml:id xml:space="preserve">m</ml:id>
								</ml:range>
							</ml:define>
						</ml:provenance>
					</math>
				</region>
				<region region-id="6687" left="42" top="706.8" width="370.2" height="46.2" align-x="68.4" align-y="720.6" show-border="false" show-highlight="false" is-protected="true" z-order="0" background-color="inherit" tag="">
					<math optimize="false" disable-calc="false">
						<ml:provenance expr-id="1" xmlns:ml="http://schemas.mathsoft.com/math30">
							<originRef doc-id="ECDB0157-7500-4B79-A800-71A425DC04B1" version-id="FFF5DE39-E1CB-4389-87A7-59EDDD400F56" branch-id="00000000-0000-0000-0000-000000000000" revision-num="448639260" is-modified="false" region-id="0" href="C:\Adionel\Pessoal\Pesquisas\Spectrum Sensing\Impulsive noise generator.xmcd" xmlns="http://schemas.mathsoft.com/provenance10">
								<hash/>
							</originRef>
							<parentRef doc-id="ECDB0157-7500-4B79-A800-71A425DC04B1" version-id="FFF5DE39-E1CB-4389-87A7-59EDDD400F56" branch-id="00000000-0000-0000-0000-000000000000" revision-num="548771252" is-modified="false" region-id="0" href="C:\Adionel\Pessoal\Pesquisas\Spectrum Sensing\Impulsive noise generator.xmcd" xmlns="http://schemas.mathsoft.com/provenance10">
								<hash/>
							</parentRef>
							<comment xmlns="http://schemas.mathsoft.com/provenance10"/>
							<originComment xmlns="http://schemas.mathsoft.com/provenance10"/>
							<contentHash xmlns="http://schemas.mathsoft.com/provenance10">cd8dc2783d8d08d05c086b3b3de6037b</contentHash>
							<ml:define>
								<ml:apply>
									<ml:indexer/>
									<ml:id xml:space="preserve" subscript="X">p</ml:id>
									<ml:id xml:space="preserve">k</ml:id>
								</ml:apply>
								<ml:program>
									<ml:ifThen>
										<ml:apply>
											<ml:lessThan/>
											<ml:id xml:space="preserve">k</ml:id>
											<ml:id xml:space="preserve">m</ml:id>
										</ml:apply>
										<ml:apply>
											<ml:mult/>
											<ml:id xml:space="preserve" subscript="IN">p</ml:id>
											<ml:parens>
												<ml:apply>
													<ml:mult/>
													<ml:apply>
														<ml:mult/>
														<ml:apply>
															<ml:id xml:space="preserve">combin</ml:id>
															<ml:sequence>
																<ml:id xml:space="preserve">m</ml:id>
																<ml:apply>
																	<ml:minus/>
																	<ml:id xml:space="preserve">m</ml:id>
																	<ml:id xml:space="preserve">k</ml:id>
																</ml:apply>
															</ml:sequence>
														</ml:apply>
														<ml:apply>
															<ml:pow/>
															<ml:parens>
																<ml:id xml:space="preserve" subscript="CR">p</ml:id>
															</ml:parens>
															<ml:apply>
																<ml:minus/>
																<ml:id xml:space="preserve">m</ml:id>
																<ml:id xml:space="preserve">k</ml:id>
															</ml:apply>
														</ml:apply>
													</ml:apply>
													<ml:apply>
														<ml:pow/>
														<ml:parens>
															<ml:apply>
																<ml:minus/>
																<ml:real>1</ml:real>
																<ml:id xml:space="preserve" subscript="CR">p</ml:id>
															</ml:apply>
														</ml:parens>
														<ml:apply>
															<ml:minus/>
															<ml:id xml:space="preserve">m</ml:id>
															<ml:parens>
																<ml:apply>
																	<ml:minus/>
																	<ml:id xml:space="preserve">m</ml:id>
																	<ml:id xml:space="preserve">k</ml:id>
																</ml:apply>
															</ml:parens>
														</ml:apply>
													</ml:apply>
												</ml:apply>
											</ml:parens>
										</ml:apply>
									</ml:ifThen>
									<ml:ifThen>
										<ml:apply>
											<ml:equal/>
											<ml:id xml:space="preserve">k</ml:id>
											<ml:id xml:space="preserve">m</ml:id>
										</ml:apply>
										<ml:apply>
											<ml:plus/>
											<ml:parens>
												<ml:apply>
													<ml:minus/>
													<ml:real>1</ml:real>
													<ml:id xml:space="preserve" subscript="IN">p</ml:id>
												</ml:apply>
											</ml:parens>
											<ml:apply>
												<ml:mult/>
												<ml:id xml:space="preserve" subscript="IN">p</ml:id>
												<ml:parens>
													<ml:apply>
														<ml:mult/>
														<ml:apply>
															<ml:mult/>
															<ml:apply>
																<ml:id xml:space="preserve">combin</ml:id>
																<ml:sequence>
																	<ml:id xml:space="preserve">m</ml:id>
																	<ml:apply>
																		<ml:minus/>
																		<ml:id xml:space="preserve">m</ml:id>
																		<ml:id xml:space="preserve">k</ml:id>
																	</ml:apply>
																</ml:sequence>
															</ml:apply>
															<ml:apply>
																<ml:pow/>
																<ml:parens>
																	<ml:id xml:space="preserve" subscript="CR">p</ml:id>
																</ml:parens>
																<ml:apply>
																	<ml:minus/>
																	<ml:id xml:space="preserve">m</ml:id>
																	<ml:id xml:space="preserve">k</ml:id>
																</ml:apply>
															</ml:apply>
														</ml:apply>
														<ml:apply>
															<ml:pow/>
															<ml:parens>
																<ml:apply>
																	<ml:minus/>
																	<ml:real>1</ml:real>
																	<ml:id xml:space="preserve" subscript="CR">p</ml:id>
																</ml:apply>
															</ml:parens>
															<ml:apply>
																<ml:minus/>
																<ml:id xml:space="preserve">m</ml:id>
																<ml:parens>
																	<ml:apply>
																		<ml:minus/>
																		<ml:id xml:space="preserve">m</ml:id>
																		<ml:id xml:space="preserve">k</ml:id>
																	</ml:apply>
																</ml:parens>
															</ml:apply>
														</ml:apply>
													</ml:apply>
												</ml:parens>
											</ml:apply>
										</ml:apply>
									</ml:ifThen>
								</ml:program>
							</ml:define>
						</ml:provenance>
					</math>
				</region>
				<region region-id="6688" left="42" top="763.2" width="179.4" height="63.6" align-x="81" align-y="786.6" show-border="false" show-highlight="false" is-protected="true" z-order="0" background-color="inherit" tag="">
					<math optimize="false" disable-calc="false">
						<ml:provenance expr-id="1" xmlns:ml="http://schemas.mathsoft.com/math30">
							<originRef doc-id="ECDB0157-7500-4B79-A800-71A425DC04B1" version-id="FFF5DE39-E1CB-4389-87A7-59EDDD400F56" branch-id="00000000-0000-0000-0000-000000000000" revision-num="548771332" is-modified="false" region-id="0" href="C:\Adionel\Pessoal\Pesquisas\Spectrum Sensing\Impulsive noise generator.xmcd" xmlns="http://schemas.mathsoft.com/provenance10">
								<hash/>
							</originRef>
							<parentRef doc-id="ECDB0157-7500-4B79-A800-71A425DC04B1" version-id="FFF5DE39-E1CB-4389-87A7-59EDDD400F56" branch-id="00000000-0000-0000-0000-000000000000" revision-num="548770772" is-modified="false" region-id="0" href="C:\Adionel\Pessoal\Pesquisas\Spectrum Sensing\Impulsive noise generator.xmcd" xmlns="http://schemas.mathsoft.com/provenance10">
								<hash/>
							</parentRef>
							<comment xmlns="http://schemas.mathsoft.com/provenance10"/>
							<originComment xmlns="http://schemas.mathsoft.com/provenance10"/>
							<contentHash xmlns="http://schemas.mathsoft.com/provenance10">6dd6b31525c730a0f3f2282006a0630e</contentHash>
							<ml:define>
								<ml:id xml:space="preserve" subscript="Xmm2">E</ml:id>
								<ml:eval placeholderMultiplicationStyle="default">
									<ml:apply>
										<ml:summation/>
										<ml:lambda>
											<ml:boundVars>
												<ml:id xml:space="preserve">x</ml:id>
											</ml:boundVars>
											<ml:parens>
												<ml:apply>
													<ml:mult/>
													<ml:id xml:space="preserve">x</ml:id>
													<ml:apply>
														<ml:div/>
														<ml:apply>
															<ml:indexer/>
															<ml:id xml:space="preserve" subscript="X">p</ml:id>
															<ml:id xml:space="preserve">x</ml:id>
														</ml:apply>
														<ml:apply>
															<ml:summation/>
															<ml:lambda>
																<ml:boundVars>
																	<ml:id xml:space="preserve">k</ml:id>
																</ml:boundVars>
																<ml:apply>
																	<ml:indexer/>
																	<ml:id xml:space="preserve" subscript="X">p</ml:id>
																	<ml:id xml:space="preserve">k</ml:id>
																</ml:apply>
															</ml:lambda>
															<ml:bounds>
																<ml:real>2</ml:real>
																<ml:id xml:space="preserve">m</ml:id>
															</ml:bounds>
														</ml:apply>
													</ml:apply>
												</ml:apply>
											</ml:parens>
										</ml:lambda>
										<ml:bounds>
											<ml:real>2</ml:real>
											<ml:id xml:space="preserve">m</ml:id>
										</ml:bounds>
									</ml:apply>
									<result xmlns="http://schemas.mathsoft.com/math30">
										<ml:real>3.6121760612177258</ml:real>
									</result>
								</ml:eval>
							</ml:define>
						</ml:provenance>
					</math>
				</region>
				<region region-id="6689" left="42" top="837" width="291" height="41.4" align-x="73.8" align-y="858.6" show-border="false" show-highlight="false" is-protected="true" z-order="0" background-color="inherit" tag="">
					<math optimize="false" disable-calc="false">
						<ml:provenance expr-id="1" xmlns:ml="http://schemas.mathsoft.com/math30">
							<originRef doc-id="ECDB0157-7500-4B79-A800-71A425DC04B1" version-id="FFF5DE39-E1CB-4389-87A7-59EDDD400F56" branch-id="00000000-0000-0000-0000-000000000000" revision-num="448639980" is-modified="false" region-id="0" href="C:\Adionel\Pessoal\Pesquisas\Spectrum Sensing\Impulsive noise generator.xmcd" xmlns="http://schemas.mathsoft.com/provenance10">
								<hash/>
							</originRef>
							<parentRef doc-id="ECDB0157-7500-4B79-A800-71A425DC04B1" version-id="FFF5DE39-E1CB-4389-87A7-59EDDD400F56" branch-id="00000000-0000-0000-0000-000000000000" revision-num="448639380" is-modified="false" region-id="0" href="C:\Adionel\Pessoal\Pesquisas\Spectrum Sensing\Impulsive noise generator.xmcd" xmlns="http://schemas.mathsoft.com/provenance10">
								<hash/>
							</parentRef>
							<comment xmlns="http://schemas.mathsoft.com/provenance10"/>
							<originComment xmlns="http://schemas.mathsoft.com/provenance10"/>
							<contentHash xmlns="http://schemas.mathsoft.com/provenance10">6678ae313655626dc9e9f13ed6ebbab5</contentHash>
							<ml:define>
								<ml:id xml:space="preserve" subscript="Xm2">P</ml:id>
								<ml:eval placeholderMultiplicationStyle="default">
									<ml:apply>
										<ml:mult/>
										<ml:id xml:space="preserve" subscript="IN">p</ml:id>
										<ml:apply>
											<ml:summation/>
											<ml:lambda>
												<ml:boundVars>
													<ml:id xml:space="preserve">x</ml:id>
												</ml:boundVars>
												<ml:parens>
													<ml:apply>
														<ml:mult/>
														<ml:apply>
															<ml:mult/>
															<ml:apply>
																<ml:id xml:space="preserve">combin</ml:id>
																<ml:sequence>
																	<ml:id xml:space="preserve">m</ml:id>
																	<ml:id xml:space="preserve">x</ml:id>
																</ml:sequence>
															</ml:apply>
															<ml:apply>
																<ml:pow/>
																<ml:parens>
																	<ml:id xml:space="preserve" subscript="CR">p</ml:id>
																</ml:parens>
																<ml:id xml:space="preserve">x</ml:id>
															</ml:apply>
														</ml:apply>
														<ml:apply>
															<ml:pow/>
															<ml:parens>
																<ml:apply>
																	<ml:minus/>
																	<ml:real>1</ml:real>
																	<ml:id xml:space="preserve" subscript="CR">p</ml:id>
																</ml:apply>
															</ml:parens>
															<ml:apply>
																<ml:minus/>
																<ml:id xml:space="preserve">m</ml:id>
																<ml:id xml:space="preserve">x</ml:id>
															</ml:apply>
														</ml:apply>
													</ml:apply>
												</ml:parens>
											</ml:lambda>
											<ml:bounds>
												<ml:apply>
													<ml:minus/>
													<ml:id xml:space="preserve">m</ml:id>
													<ml:real>1</ml:real>
												</ml:apply>
												<ml:id xml:space="preserve">m</ml:id>
											</ml:bounds>
										</ml:apply>
									</ml:apply>
									<result xmlns="http://schemas.mathsoft.com/math30">
										<ml:real>0.33613999999999994</ml:real>
									</result>
								</ml:eval>
							</ml:define>
						</ml:provenance>
					</math>
				</region>
				<region region-id="6692" left="42" top="891.6" width="213" height="16.2" align-x="67.8" align-y="900.6" show-border="false" show-highlight="false" is-protected="true" z-order="0" background-color="inherit" tag="">
					<math optimize="false" disable-calc="false">
						<ml:define xmlns:ml="http://schemas.mathsoft.com/math30">
							<ml:id xml:space="preserve" subscript="CR">A</ml:id>
							<ml:eval placeholderMultiplicationStyle="default">
								<ml:parens>
									<ml:provenance expr-id="1">
										<originRef doc-id="ECDB0157-7500-4B79-A800-71A425DC04B1" version-id="FFF5DE39-E1CB-4389-87A7-59EDDD400F56" branch-id="00000000-0000-0000-0000-000000000000" revision-num="548771052" is-modified="false" region-id="0" href="C:\Adionel\Pessoal\Pesquisas\Spectrum Sensing\Impulsive noise generator.xmcd" xmlns="http://schemas.mathsoft.com/provenance10">
											<hash/>
										</originRef>
										<parentRef doc-id="ECDB0157-7500-4B79-A800-71A425DC04B1" version-id="FFF5DE39-E1CB-4389-87A7-59EDDD400F56" branch-id="00000000-0000-0000-0000-000000000000" revision-num="548771812" is-modified="false" region-id="0" href="C:\Adionel\Pessoal\Pesquisas\Spectrum Sensing\Impulsive noise generator.xmcd" xmlns="http://schemas.mathsoft.com/provenance10">
											<hash/>
										</parentRef>
										<comment xmlns="http://schemas.mathsoft.com/provenance10"/>
										<originComment xmlns="http://schemas.mathsoft.com/provenance10"/>
										<contentHash xmlns="http://schemas.mathsoft.com/provenance10">726ba7065c09a3cf62c4f04875325b29</contentHash>
										<ml:apply>
											<ml:plus/>
											<ml:parens>
												<ml:apply>
													<ml:mult/>
													<ml:id xml:space="preserve" subscript="Xmm2">E</ml:id>
													<ml:parens>
														<ml:apply>
															<ml:minus/>
															<ml:real>1</ml:real>
															<ml:id xml:space="preserve" subscript="Xm2">P</ml:id>
														</ml:apply>
													</ml:parens>
												</ml:apply>
											</ml:parens>
											<ml:apply>
												<ml:mult/>
												<ml:real>2</ml:real>
												<ml:id xml:space="preserve" subscript="Xm2">P</ml:id>
											</ml:apply>
										</ml:apply>
									</ml:provenance>
								</ml:parens>
								<result xmlns="http://schemas.mathsoft.com/math30">
									<ml:real>3.0702591999999997</ml:real>
								</result>
							</ml:eval>
						</ml:define>
					</math>
				</region>
				<region region-id="6602" left="6" top="963.6" width="350.4" height="11.4" align-x="12.6" align-y="972.6" show-border="false" show-highlight="false" is-protected="true" z-order="0" background-color="inherit" tag="">
					<text use-page-width="false" push-down="false" lock-width="false">
						<p style="Normal" margin-left="inherit" margin-right="inherit" text-indent="inherit" text-align="inherit" list-style-type="inherit" tabs="inherit">
							<f family="Arial" charset="0">
								<b>
									<inlineAttr line-through="false">The main routine below was made to mimic the effects of the receiver shown:</inlineAttr>
								</b>
							</f>
						</p>
					</text>
				</region>
				<region region-id="6603" left="6" top="1008.6" width="398.4" height="94.8" align-x="6" align-y="1008.6" show-border="false" show-highlight="false" is-protected="true" z-order="0" background-color="inherit" tag="">
					<picture>
						<metafile mapping-mode="8" x-extent="244.2047" y-extent="54.4252" item-idref="25"/>
					</picture>
				</region>
				<region region-id="6552" left="6" top="1137.6" width="747.6" height="3266.4" align-x="69" align-y="1146.6" show-border="false" show-highlight="false" is-protected="true" z-order="0" background-color="inherit" tag="">
					<math optimize="false" disable-calc="false">
						<ml:define xmlns:ml="http://schemas.mathsoft.com/math30">
							<ml:function>
								<ml:id xml:space="preserve">OUT</ml:id>
								<ml:boundVars>
									<ml:id xml:space="preserve">γ</ml:id>
									<ml:id xml:space="preserve">SNR</ml:id>
								</ml:boundVars>
							</ml:function>
							<ml:program>
								<ml:localDefine>
									<ml:id xml:space="preserve" subscript="d">Counter</ml:id>
									<ml:real>0</ml:real>
								</ml:localDefine>
								<ml:localDefine>
									<ml:id xml:space="preserve" subscript="fa">Counter</ml:id>
									<ml:real>0</ml:real>
								</ml:localDefine>
								<ml:localDefine>
									<ml:id xml:space="preserve" subscript="totalD">Counter</ml:id>
									<ml:real>0</ml:real>
								</ml:localDefine>
								<ml:localDefine>
									<ml:id xml:space="preserve" subscript="totalFA">Counter</ml:id>
									<ml:real>0</ml:real>
								</ml:localDefine>
								<ml:for>
									<ml:id xml:space="preserve">run</ml:id>
									<ml:range>
										<ml:real>0</ml:real>
										<ml:apply>
											<ml:minus/>
											<ml:id xml:space="preserve" subscript="runs">N</ml:id>
											<ml:real>1</ml:real>
										</ml:apply>
									</ml:range>
									<ml:program>
										<ml:localDefine>
											<ml:id xml:space="preserve">μ</ml:id>
											<ml:id xml:space="preserve">m</ml:id>
										</ml:localDefine>
										<ml:localDefine>
											<ml:id xml:space="preserve">G</ml:id>
											<ml:program>
												<ml:for>
													<ml:id xml:space="preserve">u</ml:id>
													<ml:range>
														<ml:real>0</ml:real>
														<ml:apply>
															<ml:minus/>
															<ml:id xml:space="preserve">μ</ml:id>
															<ml:real>1</ml:real>
														</ml:apply>
													</ml:range>
													<ml:localDefine>
														<ml:apply>
															<ml:matcol/>
															<ml:id xml:space="preserve">Z</ml:id>
															<ml:id xml:space="preserve">u</ml:id>
														</ml:apply>
														<ml:program>
															<ml:for>
																<ml:id xml:space="preserve">i</ml:id>
																<ml:range>
																	<ml:real>0</ml:real>
																	<ml:apply>
																		<ml:minus/>
																		<ml:id xml:space="preserve">n</ml:id>
																		<ml:real>1</ml:real>
																	</ml:apply>
																</ml:range>
																<ml:localDefine>
																	<ml:apply>
																		<ml:indexer/>
																		<ml:id xml:space="preserve">g</ml:id>
																		<ml:id xml:space="preserve">i</ml:id>
																	</ml:apply>
																	<ml:real>0</ml:real>
																</ml:localDefine>
															</ml:for>
															<ml:localDefine>
																<ml:id xml:space="preserve">z</ml:id>
																<ml:program>
																	<ml:localDefine>
																		<ml:apply>
																			<ml:indexer/>
																			<ml:id xml:space="preserve">t</ml:id>
																			<ml:apply>
																				<ml:minus/>
																				<ml:apply>
																					<ml:mult/>
																					<ml:real>2</ml:real>
																					<ml:id xml:space="preserve" subscript="b">N</ml:id>
																				</ml:apply>
																				<ml:real>1</ml:real>
																			</ml:apply>
																		</ml:apply>
																		<ml:real>0</ml:real>
																	</ml:localDefine>
																	<ml:localDefine>
																		<ml:apply>
																			<ml:indexer/>
																			<ml:id xml:space="preserve">t</ml:id>
																			<ml:real>0</ml:real>
																		</ml:apply>
																		<ml:apply>
																			<ml:id xml:space="preserve">floor</ml:id>
																			<ml:apply>
																				<ml:id xml:space="preserve">rnd</ml:id>
																				<ml:apply>
																					<ml:div/>
																					<ml:id xml:space="preserve">n</ml:id>
																					<ml:id xml:space="preserve" subscript="b">N</ml:id>
																				</ml:apply>
																			</ml:apply>
																		</ml:apply>
																	</ml:localDefine>
																	<ml:localDefine>
																		<ml:apply>
																			<ml:indexer/>
																			<ml:id xml:space="preserve">t</ml:id>
																			<ml:real>1</ml:real>
																		</ml:apply>
																		<ml:apply>
																			<ml:minus/>
																			<ml:apply>
																				<ml:plus/>
																				<ml:apply>
																					<ml:indexer/>
																					<ml:id xml:space="preserve">t</ml:id>
																					<ml:real>0</ml:real>
																				</ml:apply>
																				<ml:id xml:space="preserve" subscript="s">N</ml:id>
																			</ml:apply>
																			<ml:real>1</ml:real>
																		</ml:apply>
																	</ml:localDefine>
																	<ml:ifThen>
																		<ml:parens>
																			<ml:apply>
																				<ml:greaterThan/>
																				<ml:id xml:space="preserve" subscript="b">N</ml:id>
																				<ml:real>1</ml:real>
																			</ml:apply>
																		</ml:parens>
																		<ml:for>
																			<ml:id xml:space="preserve">r</ml:id>
																			<ml:range>
																				<ml:real>1</ml:real>
																				<ml:apply>
																					<ml:minus/>
																					<ml:id xml:space="preserve" subscript="b">N</ml:id>
																					<ml:real>1</ml:real>
																				</ml:apply>
																			</ml:range>
																			<ml:program>
																				<ml:localDefine>
																					<ml:apply>
																						<ml:indexer/>
																						<ml:id xml:space="preserve">t</ml:id>
																						<ml:apply>
																							<ml:mult/>
																							<ml:real>2</ml:real>
																							<ml:id xml:space="preserve">r</ml:id>
																						</ml:apply>
																					</ml:apply>
																					<ml:apply>
																						<ml:minus/>
																						<ml:apply>
																							<ml:plus/>
																							<ml:apply>
																								<ml:plus/>
																								<ml:apply>
																									<ml:indexer/>
																									<ml:id xml:space="preserve">t</ml:id>
																									<ml:apply>
																										<ml:mult/>
																										<ml:real>2</ml:real>
																										<ml:parens>
																											<ml:apply>
																												<ml:minus/>
																												<ml:id xml:space="preserve">r</ml:id>
																												<ml:real>1</ml:real>
																											</ml:apply>
																										</ml:parens>
																									</ml:apply>
																								</ml:apply>
																								<ml:apply>
																									<ml:id xml:space="preserve">floor</ml:id>
																									<ml:apply>
																										<ml:id xml:space="preserve">rnd</ml:id>
																										<ml:apply>
																											<ml:div/>
																											<ml:id xml:space="preserve">n</ml:id>
																											<ml:id xml:space="preserve" subscript="b">N</ml:id>
																										</ml:apply>
																									</ml:apply>
																								</ml:apply>
																							</ml:apply>
																							<ml:id xml:space="preserve" subscript="s">N</ml:id>
																						</ml:apply>
																						<ml:real>0</ml:real>
																					</ml:apply>
																				</ml:localDefine>
																				<ml:localDefine>
																					<ml:apply>
																						<ml:indexer/>
																						<ml:id xml:space="preserve">t</ml:id>
																						<ml:apply>
																							<ml:plus/>
																							<ml:apply>
																								<ml:mult/>
																								<ml:real>2</ml:real>
																								<ml:id xml:space="preserve">r</ml:id>
																							</ml:apply>
																							<ml:real>1</ml:real>
																						</ml:apply>
																					</ml:apply>
																					<ml:apply>
																						<ml:minus/>
																						<ml:apply>
																							<ml:plus/>
																							<ml:apply>
																								<ml:indexer/>
																								<ml:id xml:space="preserve">t</ml:id>
																								<ml:apply>
																									<ml:mult/>
																									<ml:real>2</ml:real>
																									<ml:id xml:space="preserve">r</ml:id>
																								</ml:apply>
																							</ml:apply>
																							<ml:id xml:space="preserve" subscript="s">N</ml:id>
																						</ml:apply>
																						<ml:real>1</ml:real>
																					</ml:apply>
																				</ml:localDefine>
																			</ml:program>
																		</ml:for>
																	</ml:ifThen>
																	<ml:id xml:space="preserve">t</ml:id>
																</ml:program>
															</ml:localDefine>
															<ml:for>
																<ml:id xml:space="preserve">r</ml:id>
																<ml:range>
																	<ml:real>0</ml:real>
																	<ml:apply>
																		<ml:minus/>
																		<ml:id xml:space="preserve" subscript="b">N</ml:id>
																		<ml:real>1</ml:real>
																	</ml:apply>
																</ml:range>
																<ml:for>
																	<ml:id xml:space="preserve">w</ml:id>
																	<ml:range>
																		<ml:apply>
																			<ml:indexer/>
																			<ml:id xml:space="preserve">z</ml:id>
																			<ml:apply>
																				<ml:mult/>
																				<ml:real>2</ml:real>
																				<ml:id xml:space="preserve">r</ml:id>
																			</ml:apply>
																		</ml:apply>
																		<ml:apply>
																			<ml:indexer/>
																			<ml:id xml:space="preserve">z</ml:id>
																			<ml:apply>
																				<ml:plus/>
																				<ml:apply>
																					<ml:mult/>
																					<ml:real>2</ml:real>
																					<ml:id xml:space="preserve">r</ml:id>
																				</ml:apply>
																				<ml:real>1</ml:real>
																			</ml:apply>
																		</ml:apply>
																	</ml:range>
																	<ml:localDefine>
																		<ml:apply>
																			<ml:indexer/>
																			<ml:id xml:space="preserve">g</ml:id>
																			<ml:apply>
																				<ml:id xml:space="preserve">mod</ml:id>
																				<ml:sequence>
																					<ml:id xml:space="preserve">w</ml:id>
																					<ml:id xml:space="preserve">n</ml:id>
																				</ml:sequence>
																			</ml:apply>
																		</ml:apply>
																		<ml:real>1</ml:real>
																	</ml:localDefine>
																</ml:for>
															</ml:for>
															<ml:id xml:space="preserve">g</ml:id>
														</ml:program>
													</ml:localDefine>
												</ml:for>
												<ml:localDefine>
													<ml:id xml:space="preserve" subscript="G">v</ml:id>
													<ml:apply>
														<ml:id xml:space="preserve">rbinom</ml:id>
														<ml:sequence>
															<ml:id xml:space="preserve">μ</ml:id>
															<ml:real>1</ml:real>
															<ml:id xml:space="preserve" subscript="CR">p</ml:id>
														</ml:sequence>
													</ml:apply>
												</ml:localDefine>
												<ml:apply>
													<ml:mult/>
													<ml:apply>
														<ml:id xml:space="preserve">diag</ml:id>
														<ml:id xml:space="preserve" subscript="G">v</ml:id>
													</ml:apply>
													<ml:apply>
														<ml:transpose/>
														<ml:parens>
															<ml:parens>
																<ml:id xml:space="preserve">Z</ml:id>
															</ml:parens>
														</ml:parens>
													</ml:apply>
												</ml:apply>
											</ml:program>
										</ml:localDefine>
										<ml:ifThen>
											<ml:apply>
												<ml:greaterThan/>
												<ml:id xml:space="preserve">K</ml:id>
												<ml:real>0</ml:real>
											</ml:apply>
											<ml:program>
												<ml:localDefine>
													<ml:id xml:space="preserve" subscript="I">σ</ml:id>
													<ml:apply>
														<ml:sqrt/>
														<ml:apply>
															<ml:div/>
															<ml:id xml:space="preserve">K</ml:id>
															<ml:apply>
																<ml:pow/>
																<ml:real>10</ml:real>
																<ml:apply>
																	<ml:div/>
																	<ml:id xml:space="preserve">SNR</ml:id>
																	<ml:real>10</ml:real>
																</ml:apply>
															</ml:apply>
														</ml:apply>
													</ml:apply>
												</ml:localDefine>
												<ml:for>
													<ml:id xml:space="preserve">i</ml:id>
													<ml:range>
														<ml:real>0</ml:real>
														<ml:apply>
															<ml:minus/>
															<ml:id xml:space="preserve">n</ml:id>
															<ml:real>1</ml:real>
														</ml:apply>
													</ml:range>
													<ml:tryCatch>
														<ml:parens>
															<ml:localDefine>
																<ml:apply>
																	<ml:matcol/>
																	<ml:id xml:space="preserve">η</ml:id>
																	<ml:id xml:space="preserve">i</ml:id>
																</ml:apply>
																<ml:parens>
																	<ml:apply>
																		<ml:plus/>
																		<ml:apply>
																			<ml:id xml:space="preserve">rnorm</ml:id>
																			<ml:sequence>
																				<ml:id xml:space="preserve">μ</ml:id>
																				<ml:real>0</ml:real>
																				<ml:real>1</ml:real>
																			</ml:sequence>
																		</ml:apply>
																		<ml:apply>
																			<ml:mult/>
																			<ml:imag symbol="j">1</ml:imag>
																			<ml:apply>
																				<ml:id xml:space="preserve">rnorm</ml:id>
																				<ml:sequence>
																					<ml:id xml:space="preserve">μ</ml:id>
																					<ml:real>0</ml:real>
																					<ml:real>1</ml:real>
																				</ml:sequence>
																			</ml:apply>
																		</ml:apply>
																	</ml:apply>
																</ml:parens>
															</ml:localDefine>
														</ml:parens>
														<ml:localDefine>
															<ml:apply>
																<ml:matcol/>
																<ml:id xml:space="preserve">η</ml:id>
																<ml:id xml:space="preserve">i</ml:id>
															</ml:apply>
															<ml:parens>
																<ml:apply>
																	<ml:plus/>
																	<ml:apply>
																		<ml:id xml:space="preserve">rnorm</ml:id>
																		<ml:sequence>
																			<ml:id xml:space="preserve">μ</ml:id>
																			<ml:real>0</ml:real>
																			<ml:real>1</ml:real>
																		</ml:sequence>
																	</ml:apply>
																	<ml:apply>
																		<ml:mult/>
																		<ml:imag symbol="j">1</ml:imag>
																		<ml:apply>
																			<ml:id xml:space="preserve">rnorm</ml:id>
																			<ml:sequence>
																				<ml:id xml:space="preserve">μ</ml:id>
																				<ml:real>0</ml:real>
																				<ml:real>1</ml:real>
																			</ml:sequence>
																		</ml:apply>
																	</ml:apply>
																</ml:apply>
															</ml:parens>
														</ml:localDefine>
													</ml:tryCatch>
												</ml:for>
												<ml:localDefine>
													<ml:id xml:space="preserve" subscript="II">υ</ml:id>
													<ml:apply>
														<ml:vectorize/>
														<ml:parens>
															<ml:apply>
																<ml:mult/>
																<ml:id xml:space="preserve">η</ml:id>
																<ml:id xml:space="preserve">G</ml:id>
															</ml:apply>
														</ml:parens>
													</ml:apply>
												</ml:localDefine>
												<ml:for>
													<ml:id xml:space="preserve">j</ml:id>
													<ml:range>
														<ml:real>0</ml:real>
														<ml:apply>
															<ml:minus/>
															<ml:id xml:space="preserve">μ</ml:id>
															<ml:real>1</ml:real>
														</ml:apply>
													</ml:range>
													<ml:program>
														<ml:localDefine>
															<ml:id xml:space="preserve" subscript="υII">P</ml:id>
															<ml:apply>
																<ml:mult/>
																<ml:apply>
																	<ml:div/>
																	<ml:real>1</ml:real>
																	<ml:id xml:space="preserve">n</ml:id>
																</ml:apply>
																<ml:apply>
																	<ml:summation/>
																	<ml:lambda>
																		<ml:boundVars>
																			<ml:id xml:space="preserve">i</ml:id>
																		</ml:boundVars>
																		<ml:apply>
																			<ml:pow/>
																			<ml:parens>
																				<ml:apply>
																					<ml:absval/>
																					<ml:apply>
																						<ml:indexer/>
																						<ml:id xml:space="preserve" subscript="II">υ</ml:id>
																						<ml:sequence>
																							<ml:id xml:space="preserve">j</ml:id>
																							<ml:id xml:space="preserve">i</ml:id>
																						</ml:sequence>
																					</ml:apply>
																				</ml:apply>
																			</ml:parens>
																			<ml:real>2</ml:real>
																		</ml:apply>
																	</ml:lambda>
																	<ml:bounds>
																		<ml:real>0</ml:real>
																		<ml:apply>
																			<ml:minus/>
																			<ml:id xml:space="preserve">n</ml:id>
																			<ml:real>1</ml:real>
																		</ml:apply>
																	</ml:bounds>
																</ml:apply>
															</ml:apply>
														</ml:localDefine>
														<ml:localDefine>
															<ml:apply>
																<ml:matcol/>
																<ml:id xml:space="preserve" subscript="III">υ</ml:id>
																<ml:id xml:space="preserve">j</ml:id>
															</ml:apply>
															<ml:apply>
																<ml:mult/>
																<ml:apply>
																	<ml:div/>
																	<ml:apply>
																		<ml:matcol/>
																		<ml:parens>
																			<ml:apply>
																				<ml:transpose/>
																				<ml:id xml:space="preserve" subscript="II">υ</ml:id>
																			</ml:apply>
																		</ml:parens>
																		<ml:id xml:space="preserve">j</ml:id>
																	</ml:apply>
																	<ml:apply>
																		<ml:sqrt/>
																		<ml:id xml:space="preserve" subscript="υII">P</ml:id>
																	</ml:apply>
																</ml:apply>
																<ml:id xml:space="preserve" subscript="I">σ</ml:id>
															</ml:apply>
														</ml:localDefine>
													</ml:program>
												</ml:for>
												<ml:localDefine>
													<ml:id xml:space="preserve" subscript="I">υ</ml:id>
													<ml:apply>
														<ml:transpose/>
														<ml:id xml:space="preserve" subscript="III">υ</ml:id>
													</ml:apply>
												</ml:localDefine>
											</ml:program>
										</ml:ifThen>
										<ml:otherwise>
											<ml:localDefine>
												<ml:apply>
													<ml:indexer/>
													<ml:id xml:space="preserve" subscript="I">υ</ml:id>
													<ml:sequence>
														<ml:apply>
															<ml:minus/>
															<ml:id xml:space="preserve">μ</ml:id>
															<ml:real>1</ml:real>
														</ml:apply>
														<ml:apply>
															<ml:minus/>
															<ml:id xml:space="preserve">n</ml:id>
															<ml:real>1</ml:real>
														</ml:apply>
													</ml:sequence>
												</ml:apply>
												<ml:real>0</ml:real>
											</ml:localDefine>
										</ml:otherwise>
										<ml:for>
											<ml:id xml:space="preserve">k</ml:id>
											<ml:range>
												<ml:real>0</ml:real>
												<ml:apply>
													<ml:minus/>
													<ml:id xml:space="preserve">n</ml:id>
													<ml:real>1</ml:real>
												</ml:apply>
											</ml:range>
											<ml:program>
												<ml:tryCatch>
													<ml:localDefine>
														<ml:apply>
															<ml:matcol/>
															<ml:id xml:space="preserve">X</ml:id>
															<ml:id xml:space="preserve">k</ml:id>
														</ml:apply>
														<ml:program>
															<ml:ifThen>
																<ml:apply>
																	<ml:equal/>
																	<ml:id xml:space="preserve" subscript="tx">S</ml:id>
																	<ml:str xml:space="preserve">Noise</ml:str>
																</ml:apply>
																<ml:apply>
																	<ml:plus/>
																	<ml:apply>
																		<ml:id xml:space="preserve">rnorm</ml:id>
																		<ml:sequence>
																			<ml:id xml:space="preserve">p</ml:id>
																			<ml:real>0</ml:real>
																			<ml:apply>
																				<ml:div/>
																				<ml:apply>
																					<ml:sqrt/>
																					<ml:real>2</ml:real>
																				</ml:apply>
																				<ml:real>2</ml:real>
																			</ml:apply>
																		</ml:sequence>
																	</ml:apply>
																	<ml:apply>
																		<ml:mult/>
																		<ml:imag symbol="j">1</ml:imag>
																		<ml:parens>
																			<ml:apply>
																				<ml:id xml:space="preserve">rnorm</ml:id>
																				<ml:sequence>
																					<ml:id xml:space="preserve">p</ml:id>
																					<ml:real>0</ml:real>
																					<ml:apply>
																						<ml:div/>
																						<ml:apply>
																							<ml:sqrt/>
																							<ml:real>2</ml:real>
																						</ml:apply>
																						<ml:real>2</ml:real>
																					</ml:apply>
																				</ml:sequence>
																			</ml:apply>
																		</ml:parens>
																	</ml:apply>
																</ml:apply>
															</ml:ifThen>
															<ml:ifThen>
																<ml:apply>
																	<ml:equal/>
																	<ml:id xml:space="preserve" subscript="tx">S</ml:id>
																	<ml:str xml:space="preserve">BPSKiid</ml:str>
																</ml:apply>
																<ml:apply>
																	<ml:minus/>
																	<ml:apply>
																		<ml:mult/>
																		<ml:apply>
																			<ml:id xml:space="preserve">floor</ml:id>
																			<ml:apply>
																				<ml:id xml:space="preserve">runif</ml:id>
																				<ml:sequence>
																					<ml:id xml:space="preserve">p</ml:id>
																					<ml:real>0</ml:real>
																					<ml:real>2</ml:real>
																				</ml:sequence>
																			</ml:apply>
																		</ml:apply>
																		<ml:real>2</ml:real>
																	</ml:apply>
																	<ml:real>1</ml:real>
																</ml:apply>
															</ml:ifThen>
														</ml:program>
													</ml:localDefine>
													<ml:localDefine>
														<ml:apply>
															<ml:matcol/>
															<ml:id xml:space="preserve">X</ml:id>
															<ml:id xml:space="preserve">k</ml:id>
														</ml:apply>
														<ml:program>
															<ml:ifThen>
																<ml:apply>
																	<ml:equal/>
																	<ml:id xml:space="preserve" subscript="tx">S</ml:id>
																	<ml:str xml:space="preserve">Noise</ml:str>
																</ml:apply>
																<ml:apply>
																	<ml:plus/>
																	<ml:apply>
																		<ml:id xml:space="preserve">rnorm</ml:id>
																		<ml:sequence>
																			<ml:id xml:space="preserve">p</ml:id>
																			<ml:real>0</ml:real>
																			<ml:apply>
																				<ml:div/>
																				<ml:apply>
																					<ml:sqrt/>
																					<ml:real>2</ml:real>
																				</ml:apply>
																				<ml:real>2</ml:real>
																			</ml:apply>
																		</ml:sequence>
																	</ml:apply>
																	<ml:apply>
																		<ml:mult/>
																		<ml:imag symbol="j">1</ml:imag>
																		<ml:parens>
																			<ml:apply>
																				<ml:id xml:space="preserve">rnorm</ml:id>
																				<ml:sequence>
																					<ml:id xml:space="preserve">p</ml:id>
																					<ml:real>0</ml:real>
																					<ml:apply>
																						<ml:div/>
																						<ml:apply>
																							<ml:sqrt/>
																							<ml:real>2</ml:real>
																						</ml:apply>
																						<ml:real>2</ml:real>
																					</ml:apply>
																				</ml:sequence>
																			</ml:apply>
																		</ml:parens>
																	</ml:apply>
																</ml:apply>
															</ml:ifThen>
															<ml:ifThen>
																<ml:apply>
																	<ml:equal/>
																	<ml:id xml:space="preserve" subscript="tx">S</ml:id>
																	<ml:str xml:space="preserve">BPSKiid</ml:str>
																</ml:apply>
																<ml:apply>
																	<ml:minus/>
																	<ml:apply>
																		<ml:mult/>
																		<ml:apply>
																			<ml:id xml:space="preserve">floor</ml:id>
																			<ml:apply>
																				<ml:id xml:space="preserve">runif</ml:id>
																				<ml:sequence>
																					<ml:id xml:space="preserve">p</ml:id>
																					<ml:real>0</ml:real>
																					<ml:real>2</ml:real>
																				</ml:sequence>
																			</ml:apply>
																		</ml:apply>
																		<ml:real>2</ml:real>
																	</ml:apply>
																	<ml:real>1</ml:real>
																</ml:apply>
															</ml:ifThen>
														</ml:program>
													</ml:localDefine>
												</ml:tryCatch>
												<ml:tryCatch>
													<ml:localDefine>
														<ml:apply>
															<ml:matcol/>
															<ml:id xml:space="preserve">υ</ml:id>
															<ml:id xml:space="preserve">k</ml:id>
														</ml:apply>
														<ml:apply>
															<ml:plus/>
															<ml:apply>
																<ml:id xml:space="preserve">rnorm</ml:id>
																<ml:sequence>
																	<ml:id xml:space="preserve">μ</ml:id>
																	<ml:real>0</ml:real>
																	<ml:apply>
																		<ml:sqrt/>
																		<ml:apply>
																			<ml:div/>
																			<ml:real>1</ml:real>
																			<ml:apply>
																				<ml:mult/>
																				<ml:real>2</ml:real>
																				<ml:apply>
																					<ml:pow/>
																					<ml:real>10</ml:real>
																					<ml:apply>
																						<ml:div/>
																						<ml:id xml:space="preserve">SNR</ml:id>
																						<ml:real>10</ml:real>
																					</ml:apply>
																				</ml:apply>
																			</ml:apply>
																		</ml:apply>
																	</ml:apply>
																</ml:sequence>
															</ml:apply>
															<ml:apply>
																<ml:mult/>
																<ml:imag symbol="j">1</ml:imag>
																<ml:parens>
																	<ml:apply>
																		<ml:id xml:space="preserve">rnorm</ml:id>
																		<ml:sequence>
																			<ml:id xml:space="preserve">μ</ml:id>
																			<ml:real>0</ml:real>
																			<ml:apply>
																				<ml:sqrt/>
																				<ml:apply>
																					<ml:div/>
																					<ml:real>1</ml:real>
																					<ml:apply>
																						<ml:mult/>
																						<ml:real>2</ml:real>
																						<ml:apply>
																							<ml:pow/>
																							<ml:real>10</ml:real>
																							<ml:apply>
																								<ml:div/>
																								<ml:id xml:space="preserve">SNR</ml:id>
																								<ml:real>10</ml:real>
																							</ml:apply>
																						</ml:apply>
																					</ml:apply>
																				</ml:apply>
																			</ml:apply>
																		</ml:sequence>
																	</ml:apply>
																</ml:parens>
															</ml:apply>
														</ml:apply>
													</ml:localDefine>
													<ml:localDefine>
														<ml:apply>
															<ml:matcol/>
															<ml:id xml:space="preserve">υ</ml:id>
															<ml:id xml:space="preserve">k</ml:id>
														</ml:apply>
														<ml:apply>
															<ml:plus/>
															<ml:apply>
																<ml:id xml:space="preserve">rnorm</ml:id>
																<ml:sequence>
																	<ml:id xml:space="preserve">μ</ml:id>
																	<ml:real>0</ml:real>
																	<ml:apply>
																		<ml:sqrt/>
																		<ml:apply>
																			<ml:div/>
																			<ml:real>1</ml:real>
																			<ml:apply>
																				<ml:mult/>
																				<ml:real>2</ml:real>
																				<ml:apply>
																					<ml:pow/>
																					<ml:real>10</ml:real>
																					<ml:apply>
																						<ml:div/>
																						<ml:id xml:space="preserve">SNR</ml:id>
																						<ml:real>10</ml:real>
																					</ml:apply>
																				</ml:apply>
																			</ml:apply>
																		</ml:apply>
																	</ml:apply>
																</ml:sequence>
															</ml:apply>
															<ml:apply>
																<ml:mult/>
																<ml:imag symbol="j">1</ml:imag>
																<ml:parens>
																	<ml:apply>
																		<ml:id xml:space="preserve">rnorm</ml:id>
																		<ml:sequence>
																			<ml:id xml:space="preserve">μ</ml:id>
																			<ml:real>0</ml:real>
																			<ml:apply>
																				<ml:sqrt/>
																				<ml:apply>
																					<ml:div/>
																					<ml:real>1</ml:real>
																					<ml:apply>
																						<ml:mult/>
																						<ml:real>2</ml:real>
																						<ml:apply>
																							<ml:pow/>
																							<ml:real>10</ml:real>
																							<ml:apply>
																								<ml:div/>
																								<ml:id xml:space="preserve">SNR</ml:id>
																								<ml:real>10</ml:real>
																							</ml:apply>
																						</ml:apply>
																					</ml:apply>
																				</ml:apply>
																			</ml:apply>
																		</ml:sequence>
																	</ml:apply>
																</ml:parens>
															</ml:apply>
														</ml:apply>
													</ml:localDefine>
												</ml:tryCatch>
											</ml:program>
										</ml:for>
										<ml:for>
											<ml:id xml:space="preserve">j</ml:id>
											<ml:range>
												<ml:real>0</ml:real>
												<ml:apply>
													<ml:minus/>
													<ml:id xml:space="preserve">p</ml:id>
													<ml:real>1</ml:real>
												</ml:apply>
											</ml:range>
											<ml:tryCatch>
												<ml:localDefine>
													<ml:apply>
														<ml:matcol/>
														<ml:id xml:space="preserve">H</ml:id>
														<ml:id xml:space="preserve">j</ml:id>
													</ml:apply>
													<ml:apply>
														<ml:plus/>
														<ml:apply>
															<ml:id xml:space="preserve">rnorm</ml:id>
															<ml:sequence>
																<ml:id xml:space="preserve">μ</ml:id>
																<ml:real>0</ml:real>
																<ml:real>1</ml:real>
															</ml:sequence>
														</ml:apply>
														<ml:apply>
															<ml:mult/>
															<ml:imag symbol="j">1</ml:imag>
															<ml:parens>
																<ml:apply>
																	<ml:id xml:space="preserve">rnorm</ml:id>
																	<ml:sequence>
																		<ml:id xml:space="preserve">μ</ml:id>
																		<ml:real>0</ml:real>
																		<ml:real>1</ml:real>
																	</ml:sequence>
																</ml:apply>
															</ml:parens>
														</ml:apply>
													</ml:apply>
												</ml:localDefine>
												<ml:localDefine>
													<ml:apply>
														<ml:matcol/>
														<ml:id xml:space="preserve">H</ml:id>
														<ml:id xml:space="preserve">j</ml:id>
													</ml:apply>
													<ml:apply>
														<ml:plus/>
														<ml:apply>
															<ml:id xml:space="preserve">rnorm</ml:id>
															<ml:sequence>
																<ml:id xml:space="preserve">μ</ml:id>
																<ml:real>0</ml:real>
																<ml:real>1</ml:real>
															</ml:sequence>
														</ml:apply>
														<ml:apply>
															<ml:mult/>
															<ml:imag symbol="j">1</ml:imag>
															<ml:parens>
																<ml:apply>
																	<ml:id xml:space="preserve">rnorm</ml:id>
																	<ml:sequence>
																		<ml:id xml:space="preserve">μ</ml:id>
																		<ml:real>0</ml:real>
																		<ml:real>1</ml:real>
																	</ml:sequence>
																</ml:apply>
															</ml:parens>
														</ml:apply>
													</ml:apply>
												</ml:localDefine>
											</ml:tryCatch>
										</ml:for>
										<ml:localDefine>
											<ml:id xml:space="preserve" subscript="H">P</ml:id>
											<ml:program>
												<ml:ifThen>
													<ml:apply>
														<ml:greaterThan/>
														<ml:id xml:space="preserve">p</ml:id>
														<ml:real>1</ml:real>
													</ml:apply>
													<ml:apply>
														<ml:mult/>
														<ml:apply>
															<ml:div/>
															<ml:real>1</ml:real>
															<ml:apply>
																<ml:mult/>
																<ml:id xml:space="preserve">μ</ml:id>
																<ml:id xml:space="preserve">p</ml:id>
															</ml:apply>
														</ml:apply>
														<ml:apply>
															<ml:id xml:space="preserve">tr</ml:id>
															<ml:apply>
																<ml:mult/>
																<ml:apply>
																	<ml:transpose/>
																	<ml:parens>
																		<ml:apply>
																			<ml:conjugate/>
																			<ml:id xml:space="preserve">H</ml:id>
																		</ml:apply>
																	</ml:parens>
																</ml:apply>
																<ml:id xml:space="preserve">H</ml:id>
															</ml:apply>
														</ml:apply>
													</ml:apply>
												</ml:ifThen>
												<ml:otherwise>
													<ml:apply>
														<ml:mult/>
														<ml:apply>
															<ml:div/>
															<ml:real>1</ml:real>
															<ml:apply>
																<ml:mult/>
																<ml:id xml:space="preserve">μ</ml:id>
																<ml:id xml:space="preserve">p</ml:id>
															</ml:apply>
														</ml:apply>
														<ml:apply>
															<ml:id xml:space="preserve">tr</ml:id>
															<ml:matrix rows="1" cols="1">
																<ml:apply>
																	<ml:mult/>
																	<ml:apply>
																		<ml:transpose/>
																		<ml:parens>
																			<ml:apply>
																				<ml:conjugate/>
																				<ml:id xml:space="preserve">H</ml:id>
																			</ml:apply>
																		</ml:parens>
																	</ml:apply>
																	<ml:id xml:space="preserve">H</ml:id>
																</ml:apply>
															</ml:matrix>
														</ml:apply>
													</ml:apply>
												</ml:otherwise>
											</ml:program>
										</ml:localDefine>
										<ml:localDefine>
											<ml:id xml:space="preserve">H</ml:id>
											<ml:apply>
												<ml:div/>
												<ml:id xml:space="preserve">H</ml:id>
												<ml:apply>
													<ml:sqrt/>
													<ml:id xml:space="preserve" subscript="H">P</ml:id>
												</ml:apply>
											</ml:apply>
										</ml:localDefine>
										<ml:localDefine>
											<ml:id xml:space="preserve" subscript="TX">I</ml:id>
											<ml:apply>
												<ml:id xml:space="preserve">floor</ml:id>
												<ml:apply>
													<ml:id xml:space="preserve">rnd</ml:id>
													<ml:real>2</ml:real>
												</ml:apply>
											</ml:apply>
										</ml:localDefine>
										<ml:localDefine>
											<ml:id xml:space="preserve" subscript="RI">I</ml:id>
											<ml:apply>
												<ml:indexer/>
												<ml:apply>
													<ml:id xml:space="preserve">rbinom</ml:id>
													<ml:sequence>
														<ml:real>1</ml:real>
														<ml:real>1</ml:real>
														<ml:id xml:space="preserve" subscript="IN">p</ml:id>
													</ml:sequence>
												</ml:apply>
												<ml:real>0</ml:real>
											</ml:apply>
										</ml:localDefine>
										<ml:localDefine>
											<ml:id xml:space="preserve">y</ml:id>
											<ml:program>
												<ml:ifThen>
													<ml:apply>
														<ml:equal/>
														<ml:id xml:space="preserve">Model</ml:id>
														<ml:str xml:space="preserve">R</ml:str>
													</ml:apply>
													<ml:program>
														<ml:localDefine>
															<ml:apply>
																<ml:indexer/>
																<ml:id xml:space="preserve">ZpadX</ml:id>
																<ml:sequence>
																	<ml:apply>
																		<ml:minus/>
																		<ml:id xml:space="preserve">p</ml:id>
																		<ml:real>1</ml:real>
																	</ml:apply>
																	<ml:apply>
																		<ml:minus/>
																		<ml:id xml:space="preserve">L</ml:id>
																		<ml:real>1</ml:real>
																	</ml:apply>
																</ml:sequence>
															</ml:apply>
															<ml:real>0</ml:real>
														</ml:localDefine>
														<ml:localDefine>
															<ml:apply>
																<ml:indexer/>
																<ml:id xml:space="preserve">Zpad</ml:id>
																<ml:sequence>
																	<ml:apply>
																		<ml:minus/>
																		<ml:id xml:space="preserve">μ</ml:id>
																		<ml:real>1</ml:real>
																	</ml:apply>
																	<ml:apply>
																		<ml:minus/>
																		<ml:id xml:space="preserve">L</ml:id>
																		<ml:real>1</ml:real>
																	</ml:apply>
																</ml:sequence>
															</ml:apply>
															<ml:real>0</ml:real>
														</ml:localDefine>
														<ml:localDefine>
															<ml:id xml:space="preserve">X</ml:id>
															<ml:program>
																<ml:localDefine>
																	<ml:id xml:space="preserve" subscript="MA">X</ml:id>
																	<ml:apply>
																		<ml:id xml:space="preserve">submatrix</ml:id>
																		<ml:sequence>
																			<ml:apply>
																				<ml:mult/>
																				<ml:parens>
																					<ml:apply>
																						<ml:id xml:space="preserve">augment</ml:id>
																						<ml:sequence>
																							<ml:id xml:space="preserve">X</ml:id>
																							<ml:id xml:space="preserve">ZpadX</ml:id>
																						</ml:sequence>
																					</ml:apply>
																				</ml:parens>
																				<ml:apply>
																					<ml:transpose/>
																					<ml:id xml:space="preserve" subscript="ma">F</ml:id>
																				</ml:apply>
																			</ml:apply>
																			<ml:real>0</ml:real>
																			<ml:apply>
																				<ml:minus/>
																				<ml:id xml:space="preserve">p</ml:id>
																				<ml:real>1</ml:real>
																			</ml:apply>
																			<ml:apply>
																				<ml:minus/>
																				<ml:id xml:space="preserve">L</ml:id>
																				<ml:real>1</ml:real>
																			</ml:apply>
																			<ml:apply>
																				<ml:minus/>
																				<ml:apply>
																					<ml:plus/>
																					<ml:id xml:space="preserve">n</ml:id>
																					<ml:id xml:space="preserve">L</ml:id>
																				</ml:apply>
																				<ml:real>2</ml:real>
																			</ml:apply>
																		</ml:sequence>
																	</ml:apply>
																</ml:localDefine>
																<ml:localDefine>
																	<ml:id xml:space="preserve" subscript="X">P</ml:id>
																	<ml:apply>
																		<ml:mult/>
																		<ml:apply>
																			<ml:div/>
																			<ml:real>1</ml:real>
																			<ml:apply>
																				<ml:mult/>
																				<ml:id xml:space="preserve">p</ml:id>
																				<ml:id xml:space="preserve">n</ml:id>
																			</ml:apply>
																		</ml:apply>
																		<ml:apply>
																			<ml:summation/>
																			<ml:lambda>
																				<ml:boundVars>
																					<ml:id xml:space="preserve">i</ml:id>
																				</ml:boundVars>
																				<ml:apply>
																					<ml:summation/>
																					<ml:lambda>
																						<ml:boundVars>
																							<ml:id xml:space="preserve">j</ml:id>
																						</ml:boundVars>
																						<ml:apply>
																							<ml:pow/>
																							<ml:parens>
																								<ml:apply>
																									<ml:absval/>
																									<ml:apply>
																										<ml:indexer/>
																										<ml:parens>
																											<ml:id xml:space="preserve" subscript="MA">X</ml:id>
																										</ml:parens>
																										<ml:sequence>
																											<ml:id xml:space="preserve">i</ml:id>
																											<ml:id xml:space="preserve">j</ml:id>
																										</ml:sequence>
																									</ml:apply>
																								</ml:apply>
																							</ml:parens>
																							<ml:real>2</ml:real>
																						</ml:apply>
																					</ml:lambda>
																					<ml:bounds>
																						<ml:real>0</ml:real>
																						<ml:apply>
																							<ml:minus/>
																							<ml:id xml:space="preserve">n</ml:id>
																							<ml:real>1</ml:real>
																						</ml:apply>
																					</ml:bounds>
																				</ml:apply>
																			</ml:lambda>
																			<ml:bounds>
																				<ml:real>0</ml:real>
																				<ml:apply>
																					<ml:minus/>
																					<ml:id xml:space="preserve">p</ml:id>
																					<ml:real>1</ml:real>
																				</ml:apply>
																			</ml:bounds>
																		</ml:apply>
																	</ml:apply>
																</ml:localDefine>
																<ml:apply>
																	<ml:div/>
																	<ml:id xml:space="preserve" subscript="MA">X</ml:id>
																	<ml:apply>
																		<ml:sqrt/>
																		<ml:apply>
																			<ml:mult/>
																			<ml:id xml:space="preserve">p</ml:id>
																			<ml:id xml:space="preserve" subscript="X">P</ml:id>
																		</ml:apply>
																	</ml:apply>
																</ml:apply>
															</ml:program>
														</ml:localDefine>
														<ml:localDefine>
															<ml:id xml:space="preserve">V</ml:id>
															<ml:program>
																<ml:localDefine>
																	<ml:id xml:space="preserve" subscript="MA">V</ml:id>
																	<ml:apply>
																		<ml:id xml:space="preserve">submatrix</ml:id>
																		<ml:sequence>
																			<ml:apply>
																				<ml:mult/>
																				<ml:parens>
																					<ml:apply>
																						<ml:id xml:space="preserve">augment</ml:id>
																						<ml:sequence>
																							<ml:id xml:space="preserve">υ</ml:id>
																							<ml:id xml:space="preserve">Zpad</ml:id>
																						</ml:sequence>
																					</ml:apply>
																				</ml:parens>
																				<ml:apply>
																					<ml:transpose/>
																					<ml:id xml:space="preserve" subscript="ma">F</ml:id>
																				</ml:apply>
																			</ml:apply>
																			<ml:real>0</ml:real>
																			<ml:apply>
																				<ml:minus/>
																				<ml:id xml:space="preserve">μ</ml:id>
																				<ml:real>1</ml:real>
																			</ml:apply>
																			<ml:apply>
																				<ml:minus/>
																				<ml:id xml:space="preserve">L</ml:id>
																				<ml:real>1</ml:real>
																			</ml:apply>
																			<ml:apply>
																				<ml:minus/>
																				<ml:apply>
																					<ml:plus/>
																					<ml:id xml:space="preserve">n</ml:id>
																					<ml:id xml:space="preserve">L</ml:id>
																				</ml:apply>
																				<ml:real>2</ml:real>
																			</ml:apply>
																		</ml:sequence>
																	</ml:apply>
																</ml:localDefine>
																<ml:localDefine>
																	<ml:id xml:space="preserve" subscript="V">P</ml:id>
																	<ml:apply>
																		<ml:mult/>
																		<ml:apply>
																			<ml:div/>
																			<ml:real>1</ml:real>
																			<ml:apply>
																				<ml:mult/>
																				<ml:id xml:space="preserve">μ</ml:id>
																				<ml:id xml:space="preserve">n</ml:id>
																			</ml:apply>
																		</ml:apply>
																		<ml:apply>
																			<ml:summation/>
																			<ml:lambda>
																				<ml:boundVars>
																					<ml:id xml:space="preserve">i</ml:id>
																				</ml:boundVars>
																				<ml:apply>
																					<ml:summation/>
																					<ml:lambda>
																						<ml:boundVars>
																							<ml:id xml:space="preserve">j</ml:id>
																						</ml:boundVars>
																						<ml:apply>
																							<ml:pow/>
																							<ml:parens>
																								<ml:apply>
																									<ml:absval/>
																									<ml:apply>
																										<ml:indexer/>
																										<ml:parens>
																											<ml:id xml:space="preserve" subscript="MA">V</ml:id>
																										</ml:parens>
																										<ml:sequence>
																											<ml:id xml:space="preserve">i</ml:id>
																											<ml:id xml:space="preserve">j</ml:id>
																										</ml:sequence>
																									</ml:apply>
																								</ml:apply>
																							</ml:parens>
																							<ml:real>2</ml:real>
																						</ml:apply>
																					</ml:lambda>
																					<ml:bounds>
																						<ml:real>0</ml:real>
																						<ml:apply>
																							<ml:minus/>
																							<ml:id xml:space="preserve">n</ml:id>
																							<ml:real>1</ml:real>
																						</ml:apply>
																					</ml:bounds>
																				</ml:apply>
																			</ml:lambda>
																			<ml:bounds>
																				<ml:real>0</ml:real>
																				<ml:apply>
																					<ml:minus/>
																					<ml:id xml:space="preserve">μ</ml:id>
																					<ml:real>1</ml:real>
																				</ml:apply>
																			</ml:bounds>
																		</ml:apply>
																	</ml:apply>
																</ml:localDefine>
																<ml:apply>
																	<ml:mult/>
																	<ml:apply>
																		<ml:div/>
																		<ml:id xml:space="preserve" subscript="MA">V</ml:id>
																		<ml:apply>
																			<ml:sqrt/>
																			<ml:id xml:space="preserve" subscript="V">P</ml:id>
																		</ml:apply>
																	</ml:apply>
																	<ml:apply>
																		<ml:sqrt/>
																		<ml:apply>
																			<ml:div/>
																			<ml:real>1</ml:real>
																			<ml:apply>
																				<ml:pow/>
																				<ml:real>10</ml:real>
																				<ml:apply>
																					<ml:div/>
																					<ml:id xml:space="preserve">SNR</ml:id>
																					<ml:real>10</ml:real>
																				</ml:apply>
																			</ml:apply>
																		</ml:apply>
																	</ml:apply>
																</ml:apply>
															</ml:program>
														</ml:localDefine>
														<ml:localDefine>
															<ml:id xml:space="preserve" subscript="I">V</ml:id>
															<ml:program>
																<ml:localDefine>
																	<ml:id xml:space="preserve" subscript="IMA">V</ml:id>
																	<ml:apply>
																		<ml:id xml:space="preserve">submatrix</ml:id>
																		<ml:sequence>
																			<ml:apply>
																				<ml:mult/>
																				<ml:parens>
																					<ml:apply>
																						<ml:id xml:space="preserve">augment</ml:id>
																						<ml:sequence>
																							<ml:id xml:space="preserve" subscript="I">υ</ml:id>
																							<ml:id xml:space="preserve">Zpad</ml:id>
																						</ml:sequence>
																					</ml:apply>
																				</ml:parens>
																				<ml:apply>
																					<ml:transpose/>
																					<ml:id xml:space="preserve" subscript="ma">F</ml:id>
																				</ml:apply>
																			</ml:apply>
																			<ml:real>0</ml:real>
																			<ml:apply>
																				<ml:minus/>
																				<ml:id xml:space="preserve">μ</ml:id>
																				<ml:real>1</ml:real>
																			</ml:apply>
																			<ml:apply>
																				<ml:minus/>
																				<ml:id xml:space="preserve">L</ml:id>
																				<ml:real>1</ml:real>
																			</ml:apply>
																			<ml:apply>
																				<ml:minus/>
																				<ml:apply>
																					<ml:plus/>
																					<ml:id xml:space="preserve">n</ml:id>
																					<ml:id xml:space="preserve">L</ml:id>
																				</ml:apply>
																				<ml:real>2</ml:real>
																			</ml:apply>
																		</ml:sequence>
																	</ml:apply>
																</ml:localDefine>
																<ml:localDefine>
																	<ml:id xml:space="preserve" subscript="VI">P</ml:id>
																	<ml:apply>
																		<ml:mult/>
																		<ml:apply>
																			<ml:div/>
																			<ml:real>1</ml:real>
																			<ml:apply>
																				<ml:mult/>
																				<ml:id xml:space="preserve">μ</ml:id>
																				<ml:id xml:space="preserve">n</ml:id>
																			</ml:apply>
																		</ml:apply>
																		<ml:apply>
																			<ml:summation/>
																			<ml:lambda>
																				<ml:boundVars>
																					<ml:id xml:space="preserve">i</ml:id>
																				</ml:boundVars>
																				<ml:apply>
																					<ml:summation/>
																					<ml:lambda>
																						<ml:boundVars>
																							<ml:id xml:space="preserve">j</ml:id>
																						</ml:boundVars>
																						<ml:apply>
																							<ml:pow/>
																							<ml:parens>
																								<ml:apply>
																									<ml:absval/>
																									<ml:apply>
																										<ml:indexer/>
																										<ml:parens>
																											<ml:id xml:space="preserve" subscript="IMA">V</ml:id>
																										</ml:parens>
																										<ml:sequence>
																											<ml:id xml:space="preserve">i</ml:id>
																											<ml:id xml:space="preserve">j</ml:id>
																										</ml:sequence>
																									</ml:apply>
																								</ml:apply>
																							</ml:parens>
																							<ml:real>2</ml:real>
																						</ml:apply>
																					</ml:lambda>
																					<ml:bounds>
																						<ml:real>0</ml:real>
																						<ml:apply>
																							<ml:minus/>
																							<ml:id xml:space="preserve">n</ml:id>
																							<ml:real>1</ml:real>
																						</ml:apply>
																					</ml:bounds>
																				</ml:apply>
																			</ml:lambda>
																			<ml:bounds>
																				<ml:real>0</ml:real>
																				<ml:apply>
																					<ml:minus/>
																					<ml:id xml:space="preserve">μ</ml:id>
																					<ml:real>1</ml:real>
																				</ml:apply>
																			</ml:bounds>
																		</ml:apply>
																	</ml:apply>
																</ml:localDefine>
																<ml:apply>
																	<ml:mult/>
																	<ml:apply>
																		<ml:div/>
																		<ml:id xml:space="preserve" subscript="IMA">V</ml:id>
																		<ml:apply>
																			<ml:sqrt/>
																			<ml:id xml:space="preserve" subscript="VI">P</ml:id>
																		</ml:apply>
																	</ml:apply>
																	<ml:id xml:space="preserve" subscript="I">σ</ml:id>
																</ml:apply>
															</ml:program>
														</ml:localDefine>
														<ml:localDefine>
															<ml:id xml:space="preserve">Y</ml:id>
															<ml:apply>
																<ml:plus/>
																<ml:apply>
																	<ml:plus/>
																	<ml:apply>
																		<ml:mult/>
																		<ml:apply>
																			<ml:mult/>
																			<ml:id xml:space="preserve" subscript="TX">I</ml:id>
																			<ml:id xml:space="preserve">H</ml:id>
																		</ml:apply>
																		<ml:id xml:space="preserve">X</ml:id>
																	</ml:apply>
																	<ml:id xml:space="preserve">V</ml:id>
																</ml:apply>
																<ml:apply>
																	<ml:mult/>
																	<ml:id xml:space="preserve" subscript="RI">I</ml:id>
																	<ml:id xml:space="preserve" subscript="I">V</ml:id>
																</ml:apply>
															</ml:apply>
														</ml:localDefine>
														<ml:for>
															<ml:id xml:space="preserve">i</ml:id>
															<ml:range>
																<ml:real>0</ml:real>
																<ml:apply>
																	<ml:minus/>
																	<ml:id xml:space="preserve">μ</ml:id>
																	<ml:real>1</ml:real>
																</ml:apply>
															</ml:range>
															<ml:program>
																<ml:localDefine>
																	<ml:id xml:space="preserve" subscript="wf">Y</ml:id>
																	<ml:apply>
																		<ml:mult/>
																		<ml:id xml:space="preserve" subscript="wf">W</ml:id>
																		<ml:apply>
																			<ml:matcol/>
																			<ml:parens>
																				<ml:apply>
																					<ml:transpose/>
																					<ml:id xml:space="preserve">Y</ml:id>
																				</ml:apply>
																			</ml:parens>
																			<ml:id xml:space="preserve">i</ml:id>
																		</ml:apply>
																	</ml:apply>
																</ml:localDefine>
																<ml:localDefine>
																	<ml:apply>
																		<ml:indexer/>
																		<ml:id xml:space="preserve" subscript="R">g</ml:id>
																		<ml:id xml:space="preserve">i</ml:id>
																	</ml:apply>
																	<ml:apply>
																		<ml:mult/>
																		<ml:apply>
																			<ml:mult/>
																			<ml:apply>
																				<ml:sqrt/>
																				<ml:real>2</ml:real>
																			</ml:apply>
																			<ml:apply>
																				<ml:div/>
																				<ml:id xml:space="preserve">D</ml:id>
																				<ml:apply>
																					<ml:div/>
																					<ml:real>6</ml:real>
																					<ml:id xml:space="preserve" subscript="od">f</ml:id>
																				</ml:apply>
																			</ml:apply>
																		</ml:apply>
																		<ml:parens>
																			<ml:apply>
																				<ml:div/>
																				<ml:real>1</ml:real>
																				<ml:apply>
																					<ml:sqrt/>
																					<ml:apply>
																						<ml:mult/>
																						<ml:apply>
																							<ml:div/>
																							<ml:real>1</ml:real>
																							<ml:id xml:space="preserve">n</ml:id>
																						</ml:apply>
																						<ml:parens>
																							<ml:apply>
																								<ml:mult/>
																								<ml:apply>
																									<ml:transpose/>
																									<ml:parens>
																										<ml:apply>
																											<ml:conjugate/>
																											<ml:id xml:space="preserve" subscript="wf">Y</ml:id>
																										</ml:apply>
																									</ml:parens>
																								</ml:apply>
																								<ml:id xml:space="preserve" subscript="wf">Y</ml:id>
																							</ml:apply>
																						</ml:parens>
																					</ml:apply>
																				</ml:apply>
																			</ml:apply>
																		</ml:parens>
																	</ml:apply>
																</ml:localDefine>
																<ml:localDefine>
																	<ml:id xml:space="preserve" subscript="in">y</ml:id>
																	<ml:apply>
																		<ml:mult/>
																		<ml:apply>
																			<ml:indexer/>
																			<ml:id xml:space="preserve" subscript="R">g</ml:id>
																			<ml:id xml:space="preserve">i</ml:id>
																		</ml:apply>
																		<ml:id xml:space="preserve" subscript="wf">Y</ml:id>
																	</ml:apply>
																</ml:localDefine>
																<ml:ifThen>
																	<ml:parens>
																		<ml:apply>
																			<ml:and/>
																			<ml:apply>
																				<ml:equal/>
																				<ml:apply>
																					<ml:indexer/>
																					<ml:id xml:space="preserve" subscript="G">v</ml:id>
																					<ml:id xml:space="preserve">i</ml:id>
																				</ml:apply>
																				<ml:real>1</ml:real>
																			</ml:apply>
																			<ml:apply>
																				<ml:equal/>
																				<ml:id xml:space="preserve" subscript="RI">I</ml:id>
																				<ml:real>1</ml:real>
																			</ml:apply>
																		</ml:apply>
																	</ml:parens>
																	<ml:program>
																		<ml:ifThen>
																			<ml:apply>
																				<ml:equal/>
																				<ml:id xml:space="preserve" subscript="countermeasure">IN</ml:id>
																				<ml:str xml:space="preserve">M</ml:str>
																			</ml:apply>
																			<ml:for>
																				<ml:id xml:space="preserve">j</ml:id>
																				<ml:range>
																					<ml:real>0</ml:real>
																					<ml:apply>
																						<ml:minus/>
																						<ml:id xml:space="preserve">n</ml:id>
																						<ml:real>1</ml:real>
																					</ml:apply>
																				</ml:range>
																				<ml:program>
																					<ml:ifThen>
																						<ml:parens>
																							<ml:apply>
																								<ml:equal/>
																								<ml:apply>
																									<ml:indexer/>
																									<ml:parens>
																										<ml:apply>
																											<ml:mult/>
																											<ml:apply>
																												<ml:transpose/>
																												<ml:id xml:space="preserve">G</ml:id>
																											</ml:apply>
																											<ml:apply>
																												<ml:matcol/>
																												<ml:apply>
																													<ml:id xml:space="preserve">diag</ml:id>
																													<ml:id xml:space="preserve" subscript="G">v</ml:id>
																												</ml:apply>
																												<ml:id xml:space="preserve">i</ml:id>
																											</ml:apply>
																										</ml:apply>
																									</ml:parens>
																									<ml:id xml:space="preserve">j</ml:id>
																								</ml:apply>
																								<ml:real>1</ml:real>
																							</ml:apply>
																						</ml:parens>
																						<ml:localDefine>
																							<ml:apply>
																								<ml:indexer/>
																								<ml:id xml:space="preserve" subscript="in">y</ml:id>
																								<ml:id xml:space="preserve">j</ml:id>
																							</ml:apply>
																							<ml:real>0</ml:real>
																						</ml:localDefine>
																					</ml:ifThen>
																					<ml:otherwise>
																						<ml:localDefine>
																							<ml:apply>
																								<ml:indexer/>
																								<ml:id xml:space="preserve" subscript="in">y</ml:id>
																								<ml:id xml:space="preserve">j</ml:id>
																							</ml:apply>
																							<ml:apply>
																								<ml:indexer/>
																								<ml:id xml:space="preserve" subscript="in">y</ml:id>
																								<ml:id xml:space="preserve">j</ml:id>
																							</ml:apply>
																						</ml:localDefine>
																					</ml:otherwise>
																				</ml:program>
																			</ml:for>
																		</ml:ifThen>
																		<ml:ifThen>
																			<ml:apply>
																				<ml:equal/>
																				<ml:id xml:space="preserve" subscript="countermeasure">IN</ml:id>
																				<ml:str xml:space="preserve">N</ml:str>
																			</ml:apply>
																			<ml:parens>
																				<ml:localDefine>
																					<ml:id xml:space="preserve" subscript="in">y</ml:id>
																					<ml:id xml:space="preserve" subscript="in">y</ml:id>
																				</ml:localDefine>
																			</ml:parens>
																		</ml:ifThen>
																	</ml:program>
																</ml:ifThen>
																<ml:localDefine>
																	<ml:id xml:space="preserve">ReY</ml:id>
																	<ml:apply>
																		<ml:id xml:space="preserve">Re</ml:id>
																		<ml:id xml:space="preserve" subscript="in">y</ml:id>
																	</ml:apply>
																</ml:localDefine>
																<ml:localDefine>
																	<ml:id xml:space="preserve" subscript="c">ReY</ml:id>
																	<ml:program>
																		<ml:for>
																			<ml:id xml:space="preserve">j</ml:id>
																			<ml:range>
																				<ml:real>0</ml:real>
																				<ml:apply>
																					<ml:minus/>
																					<ml:id xml:space="preserve">n</ml:id>
																					<ml:real>1</ml:real>
																				</ml:apply>
																			</ml:range>
																			<ml:localDefine>
																				<ml:apply>
																					<ml:indexer/>
																					<ml:id xml:space="preserve" subscript="c">reY</ml:id>
																					<ml:id xml:space="preserve">j</ml:id>
																				</ml:apply>
																				<ml:apply>
																					<ml:mult/>
																					<ml:apply>
																						<ml:id xml:space="preserve">min</ml:id>
																						<ml:sequence>
																							<ml:apply>
																								<ml:absval/>
																								<ml:apply>
																									<ml:indexer/>
																									<ml:id xml:space="preserve">ReY</ml:id>
																									<ml:id xml:space="preserve">j</ml:id>
																								</ml:apply>
																							</ml:apply>
																							<ml:apply>
																								<ml:div/>
																								<ml:id xml:space="preserve">D</ml:id>
																								<ml:real>2</ml:real>
																							</ml:apply>
																						</ml:sequence>
																					</ml:apply>
																					<ml:apply>
																						<ml:id xml:space="preserve">sign</ml:id>
																						<ml:apply>
																							<ml:indexer/>
																							<ml:id xml:space="preserve">ReY</ml:id>
																							<ml:id xml:space="preserve">j</ml:id>
																						</ml:apply>
																					</ml:apply>
																				</ml:apply>
																			</ml:localDefine>
																		</ml:for>
																		<ml:id xml:space="preserve" subscript="c">reY</ml:id>
																	</ml:program>
																</ml:localDefine>
																<ml:localDefine>
																	<ml:id xml:space="preserve">ImY</ml:id>
																	<ml:apply>
																		<ml:id xml:space="preserve">Im</ml:id>
																		<ml:id xml:space="preserve" subscript="in">y</ml:id>
																	</ml:apply>
																</ml:localDefine>
																<ml:localDefine>
																	<ml:id xml:space="preserve" subscript="c">ImY</ml:id>
																	<ml:program>
																		<ml:for>
																			<ml:id xml:space="preserve">j</ml:id>
																			<ml:range>
																				<ml:real>0</ml:real>
																				<ml:apply>
																					<ml:minus/>
																					<ml:id xml:space="preserve">n</ml:id>
																					<ml:real>1</ml:real>
																				</ml:apply>
																			</ml:range>
																			<ml:localDefine>
																				<ml:apply>
																					<ml:indexer/>
																					<ml:id xml:space="preserve" subscript="c">imY</ml:id>
																					<ml:id xml:space="preserve">j</ml:id>
																				</ml:apply>
																				<ml:apply>
																					<ml:mult/>
																					<ml:apply>
																						<ml:id xml:space="preserve">min</ml:id>
																						<ml:sequence>
																							<ml:apply>
																								<ml:absval/>
																								<ml:apply>
																									<ml:indexer/>
																									<ml:id xml:space="preserve">ImY</ml:id>
																									<ml:id xml:space="preserve">j</ml:id>
																								</ml:apply>
																							</ml:apply>
																							<ml:apply>
																								<ml:div/>
																								<ml:id xml:space="preserve">D</ml:id>
																								<ml:real>2</ml:real>
																							</ml:apply>
																						</ml:sequence>
																					</ml:apply>
																					<ml:apply>
																						<ml:id xml:space="preserve">sign</ml:id>
																						<ml:apply>
																							<ml:indexer/>
																							<ml:id xml:space="preserve">ImY</ml:id>
																							<ml:id xml:space="preserve">j</ml:id>
																						</ml:apply>
																					</ml:apply>
																				</ml:apply>
																			</ml:localDefine>
																		</ml:for>
																		<ml:id xml:space="preserve" subscript="c">imY</ml:id>
																	</ml:program>
																</ml:localDefine>
																<ml:localDefine>
																	<ml:apply>
																		<ml:matcol/>
																		<ml:id xml:space="preserve">reY</ml:id>
																		<ml:id xml:space="preserve">i</ml:id>
																	</ml:apply>
																	<ml:apply>
																		<ml:id xml:space="preserve">quantize</ml:id>
																		<ml:sequence>
																			<ml:id xml:space="preserve" subscript="c">ReY</ml:id>
																			<ml:id xml:space="preserve" subscript="q">N</ml:id>
																		</ml:sequence>
																	</ml:apply>
																</ml:localDefine>
																<ml:localDefine>
																	<ml:apply>
																		<ml:matcol/>
																		<ml:id xml:space="preserve">imY</ml:id>
																		<ml:id xml:space="preserve">i</ml:id>
																	</ml:apply>
																	<ml:apply>
																		<ml:id xml:space="preserve">quantize</ml:id>
																		<ml:sequence>
																			<ml:id xml:space="preserve" subscript="c">ImY</ml:id>
																			<ml:id xml:space="preserve" subscript="q">N</ml:id>
																		</ml:sequence>
																	</ml:apply>
																</ml:localDefine>
															</ml:program>
														</ml:for>
														<ml:localDefine>
															<ml:id xml:space="preserve">Y</ml:id>
															<ml:apply>
																<ml:plus/>
																<ml:apply>
																	<ml:transpose/>
																	<ml:id xml:space="preserve">reY</ml:id>
																</ml:apply>
																<ml:apply>
																	<ml:mult/>
																	<ml:imag symbol="j">1</ml:imag>
																	<ml:apply>
																		<ml:transpose/>
																		<ml:id xml:space="preserve">imY</ml:id>
																	</ml:apply>
																</ml:apply>
															</ml:apply>
														</ml:localDefine>
														<ml:ifThen>
															<ml:parens>
																<ml:apply>
																	<ml:and/>
																	<ml:apply>
																		<ml:and/>
																		<ml:apply>
																			<ml:equal/>
																			<ml:id xml:space="preserve" subscript="countermeasure">IN</ml:id>
																			<ml:str xml:space="preserve">E</ml:str>
																		</ml:apply>
																		<ml:apply>
																			<ml:greaterThan/>
																			<ml:id xml:space="preserve">K</ml:id>
																			<ml:real>0</ml:real>
																		</ml:apply>
																	</ml:apply>
																	<ml:apply>
																		<ml:equal/>
																		<ml:id xml:space="preserve" subscript="RI">I</ml:id>
																		<ml:real>1</ml:real>
																	</ml:apply>
																</ml:apply>
															</ml:parens>
															<ml:program>
																<ml:localDefine>
																	<ml:id xml:space="preserve" subscript="s">M</ml:id>
																	<ml:program>
																		<ml:tryCatch>
																			<ml:parens>
																				<ml:localDefine>
																					<ml:id xml:space="preserve" subscript="off">RI</ml:id>
																					<ml:apply>
																						<ml:id xml:space="preserve">match</ml:id>
																						<ml:sequence>
																							<ml:real>0</ml:real>
																							<ml:id xml:space="preserve" subscript="G">v</ml:id>
																						</ml:sequence>
																					</ml:apply>
																				</ml:localDefine>
																			</ml:parens>
																			<ml:parens>
																				<ml:localDefine>
																					<ml:id xml:space="preserve" subscript="off">RI</ml:id>
																					<ml:matrix rows="2" cols="1">
																						<ml:real>0</ml:real>
																						<ml:real>1</ml:real>
																					</ml:matrix>
																				</ml:localDefine>
																			</ml:parens>
																		</ml:tryCatch>
																		<ml:localDefine>
																			<ml:id xml:space="preserve" subscript="noIN">N</ml:id>
																			<ml:apply>
																				<ml:plus/>
																				<ml:apply>
																					<ml:id xml:space="preserve">last</ml:id>
																					<ml:id xml:space="preserve" subscript="off">RI</ml:id>
																				</ml:apply>
																				<ml:real>1</ml:real>
																			</ml:apply>
																		</ml:localDefine>
																		<ml:localDefine>
																			<ml:id xml:space="preserve">J</ml:id>
																			<ml:real>0</ml:real>
																		</ml:localDefine>
																		<ml:for>
																			<ml:id xml:space="preserve">i</ml:id>
																			<ml:range>
																				<ml:real>0</ml:real>
																				<ml:apply>
																					<ml:minus/>
																					<ml:id xml:space="preserve" subscript="noIN">N</ml:id>
																					<ml:real>1</ml:real>
																				</ml:apply>
																			</ml:range>
																			<ml:localDefine>
																				<ml:apply>
																					<ml:matcol/>
																					<ml:id xml:space="preserve">J</ml:id>
																					<ml:id xml:space="preserve">i</ml:id>
																				</ml:apply>
																				<ml:apply>
																					<ml:matcol/>
																					<ml:parens>
																						<ml:apply>
																							<ml:id xml:space="preserve">identity</ml:id>
																							<ml:id xml:space="preserve">μ</ml:id>
																						</ml:apply>
																					</ml:parens>
																					<ml:parens>
																						<ml:apply>
																							<ml:indexer/>
																							<ml:id xml:space="preserve" subscript="off">RI</ml:id>
																							<ml:id xml:space="preserve">i</ml:id>
																						</ml:apply>
																					</ml:parens>
																				</ml:apply>
																			</ml:localDefine>
																		</ml:for>
																		<ml:ifThen>
																			<ml:apply>
																				<ml:equal/>
																				<ml:id xml:space="preserve" subscript="noIN">N</ml:id>
																				<ml:real>1</ml:real>
																			</ml:apply>
																			<ml:program>
																				<ml:localDefine>
																					<ml:id xml:space="preserve" subscript="rot">J</ml:id>
																					<ml:apply>
																						<ml:mult/>
																						<ml:id xml:space="preserve" subscript="matrix">R</ml:id>
																						<ml:id xml:space="preserve">J</ml:id>
																					</ml:apply>
																				</ml:localDefine>
																				<ml:localDefine>
																					<ml:id xml:space="preserve">J</ml:id>
																					<ml:apply>
																						<ml:id xml:space="preserve">augment</ml:id>
																						<ml:sequence>
																							<ml:id xml:space="preserve">J</ml:id>
																							<ml:id xml:space="preserve" subscript="rot">J</ml:id>
																						</ml:sequence>
																					</ml:apply>
																				</ml:localDefine>
																			</ml:program>
																		</ml:ifThen>
																		<ml:apply>
																			<ml:transpose/>
																			<ml:id xml:space="preserve">J</ml:id>
																		</ml:apply>
																	</ml:program>
																</ml:localDefine>
																<ml:localDefine>
																	<ml:id xml:space="preserve">Y</ml:id>
																	<ml:apply>
																		<ml:mult/>
																		<ml:id xml:space="preserve" subscript="s">M</ml:id>
																		<ml:parens>
																			<ml:id xml:space="preserve">Y</ml:id>
																		</ml:parens>
																	</ml:apply>
																</ml:localDefine>
																<ml:localDefine>
																	<ml:id xml:space="preserve">μ</ml:id>
																	<ml:apply>
																		<ml:id xml:space="preserve">rows</ml:id>
																		<ml:id xml:space="preserve" subscript="s">M</ml:id>
																	</ml:apply>
																</ml:localDefine>
															</ml:program>
														</ml:ifThen>
														<ml:id xml:space="preserve">Y</ml:id>
													</ml:program>
												</ml:ifThen>
												<ml:ifThen>
													<ml:apply>
														<ml:equal/>
														<ml:id xml:space="preserve">Model</ml:id>
														<ml:str xml:space="preserve">C</ml:str>
													</ml:apply>
													<ml:program>
														<ml:localDefine>
															<ml:id xml:space="preserve">Y</ml:id>
															<ml:apply>
																<ml:plus/>
																<ml:apply>
																	<ml:plus/>
																	<ml:apply>
																		<ml:mult/>
																		<ml:apply>
																			<ml:mult/>
																			<ml:id xml:space="preserve" subscript="TX">I</ml:id>
																			<ml:id xml:space="preserve">H</ml:id>
																		</ml:apply>
																		<ml:id xml:space="preserve">X</ml:id>
																	</ml:apply>
																	<ml:id xml:space="preserve">υ</ml:id>
																</ml:apply>
																<ml:apply>
																	<ml:mult/>
																	<ml:id xml:space="preserve" subscript="RI">I</ml:id>
																	<ml:id xml:space="preserve" subscript="I">υ</ml:id>
																</ml:apply>
															</ml:apply>
														</ml:localDefine>
														<ml:for>
															<ml:id xml:space="preserve">i</ml:id>
															<ml:range>
																<ml:real>0</ml:real>
																<ml:apply>
																	<ml:minus/>
																	<ml:id xml:space="preserve">μ</ml:id>
																	<ml:real>1</ml:real>
																</ml:apply>
															</ml:range>
															<ml:program>
																<ml:localDefine>
																	<ml:apply>
																		<ml:indexer/>
																		<ml:id xml:space="preserve">Gain</ml:id>
																		<ml:id xml:space="preserve">i</ml:id>
																	</ml:apply>
																	<ml:real>1</ml:real>
																</ml:localDefine>
																<ml:localDefine>
																	<ml:id xml:space="preserve" subscript="in">y</ml:id>
																	<ml:apply>
																		<ml:matcol/>
																		<ml:parens>
																			<ml:apply>
																				<ml:transpose/>
																				<ml:id xml:space="preserve">Y</ml:id>
																			</ml:apply>
																		</ml:parens>
																		<ml:id xml:space="preserve">i</ml:id>
																	</ml:apply>
																</ml:localDefine>
																<ml:ifThen>
																	<ml:parens>
																		<ml:apply>
																			<ml:and/>
																			<ml:apply>
																				<ml:equal/>
																				<ml:apply>
																					<ml:indexer/>
																					<ml:id xml:space="preserve" subscript="G">v</ml:id>
																					<ml:id xml:space="preserve">i</ml:id>
																				</ml:apply>
																				<ml:real>1</ml:real>
																			</ml:apply>
																			<ml:apply>
																				<ml:equal/>
																				<ml:id xml:space="preserve" subscript="RI">I</ml:id>
																				<ml:real>1</ml:real>
																			</ml:apply>
																		</ml:apply>
																	</ml:parens>
																	<ml:program>
																		<ml:ifThen>
																			<ml:apply>
																				<ml:equal/>
																				<ml:id xml:space="preserve" subscript="countermeasure">IN</ml:id>
																				<ml:str xml:space="preserve">M</ml:str>
																			</ml:apply>
																			<ml:for>
																				<ml:id xml:space="preserve">j</ml:id>
																				<ml:range>
																					<ml:real>0</ml:real>
																					<ml:apply>
																						<ml:minus/>
																						<ml:id xml:space="preserve">n</ml:id>
																						<ml:real>1</ml:real>
																					</ml:apply>
																				</ml:range>
																				<ml:program>
																					<ml:ifThen>
																						<ml:parens>
																							<ml:apply>
																								<ml:equal/>
																								<ml:apply>
																									<ml:indexer/>
																									<ml:parens>
																										<ml:apply>
																											<ml:mult/>
																											<ml:apply>
																												<ml:transpose/>
																												<ml:id xml:space="preserve">G</ml:id>
																											</ml:apply>
																											<ml:apply>
																												<ml:matcol/>
																												<ml:apply>
																													<ml:id xml:space="preserve">diag</ml:id>
																													<ml:id xml:space="preserve" subscript="G">v</ml:id>
																												</ml:apply>
																												<ml:id xml:space="preserve">i</ml:id>
																											</ml:apply>
																										</ml:apply>
																									</ml:parens>
																									<ml:id xml:space="preserve">j</ml:id>
																								</ml:apply>
																								<ml:real>1</ml:real>
																							</ml:apply>
																						</ml:parens>
																						<ml:localDefine>
																							<ml:apply>
																								<ml:indexer/>
																								<ml:id xml:space="preserve" subscript="in">y</ml:id>
																								<ml:id xml:space="preserve">j</ml:id>
																							</ml:apply>
																							<ml:real>0</ml:real>
																						</ml:localDefine>
																					</ml:ifThen>
																					<ml:otherwise>
																						<ml:localDefine>
																							<ml:apply>
																								<ml:indexer/>
																								<ml:id xml:space="preserve" subscript="in">y</ml:id>
																								<ml:id xml:space="preserve">j</ml:id>
																							</ml:apply>
																							<ml:apply>
																								<ml:indexer/>
																								<ml:id xml:space="preserve" subscript="in">y</ml:id>
																								<ml:id xml:space="preserve">j</ml:id>
																							</ml:apply>
																						</ml:localDefine>
																					</ml:otherwise>
																				</ml:program>
																			</ml:for>
																		</ml:ifThen>
																		<ml:ifThen>
																			<ml:apply>
																				<ml:equal/>
																				<ml:id xml:space="preserve" subscript="countermeasure">IN</ml:id>
																				<ml:str xml:space="preserve">N</ml:str>
																			</ml:apply>
																			<ml:parens>
																				<ml:localDefine>
																					<ml:id xml:space="preserve" subscript="in">y</ml:id>
																					<ml:id xml:space="preserve" subscript="in">y</ml:id>
																				</ml:localDefine>
																			</ml:parens>
																		</ml:ifThen>
																	</ml:program>
																</ml:ifThen>
																<ml:localDefine>
																	<ml:apply>
																		<ml:matcol/>
																		<ml:id xml:space="preserve" subscript="IN">y</ml:id>
																		<ml:id xml:space="preserve">i</ml:id>
																	</ml:apply>
																	<ml:id xml:space="preserve" subscript="in">y</ml:id>
																</ml:localDefine>
															</ml:program>
														</ml:for>
														<ml:localDefine>
															<ml:id xml:space="preserve">Y</ml:id>
															<ml:apply>
																<ml:transpose/>
																<ml:id xml:space="preserve" subscript="IN">y</ml:id>
															</ml:apply>
														</ml:localDefine>
														<ml:ifThen>
															<ml:parens>
																<ml:apply>
																	<ml:and/>
																	<ml:apply>
																		<ml:and/>
																		<ml:apply>
																			<ml:equal/>
																			<ml:id xml:space="preserve" subscript="countermeasure">IN</ml:id>
																			<ml:str xml:space="preserve">E</ml:str>
																		</ml:apply>
																		<ml:apply>
																			<ml:greaterThan/>
																			<ml:id xml:space="preserve">K</ml:id>
																			<ml:real>0</ml:real>
																		</ml:apply>
																	</ml:apply>
																	<ml:apply>
																		<ml:equal/>
																		<ml:id xml:space="preserve" subscript="RI">I</ml:id>
																		<ml:real>1</ml:real>
																	</ml:apply>
																</ml:apply>
															</ml:parens>
															<ml:program>
																<ml:localDefine>
																	<ml:id xml:space="preserve" subscript="s">M</ml:id>
																	<ml:program>
																		<ml:tryCatch>
																			<ml:parens>
																				<ml:localDefine>
																					<ml:id xml:space="preserve" subscript="off">RI</ml:id>
																					<ml:apply>
																						<ml:id xml:space="preserve">match</ml:id>
																						<ml:sequence>
																							<ml:real>0</ml:real>
																							<ml:id xml:space="preserve" subscript="G">v</ml:id>
																						</ml:sequence>
																					</ml:apply>
																				</ml:localDefine>
																			</ml:parens>
																			<ml:parens>
																				<ml:localDefine>
																					<ml:id xml:space="preserve" subscript="off">RI</ml:id>
																					<ml:matrix rows="2" cols="1">
																						<ml:real>0</ml:real>
																						<ml:real>1</ml:real>
																					</ml:matrix>
																				</ml:localDefine>
																			</ml:parens>
																		</ml:tryCatch>
																		<ml:localDefine>
																			<ml:id xml:space="preserve" subscript="noIN">N</ml:id>
																			<ml:apply>
																				<ml:plus/>
																				<ml:apply>
																					<ml:id xml:space="preserve">last</ml:id>
																					<ml:id xml:space="preserve" subscript="off">RI</ml:id>
																				</ml:apply>
																				<ml:real>1</ml:real>
																			</ml:apply>
																		</ml:localDefine>
																		<ml:localDefine>
																			<ml:id xml:space="preserve">J</ml:id>
																			<ml:real>0</ml:real>
																		</ml:localDefine>
																		<ml:for>
																			<ml:id xml:space="preserve">i</ml:id>
																			<ml:range>
																				<ml:real>0</ml:real>
																				<ml:apply>
																					<ml:minus/>
																					<ml:id xml:space="preserve" subscript="noIN">N</ml:id>
																					<ml:real>1</ml:real>
																				</ml:apply>
																			</ml:range>
																			<ml:localDefine>
																				<ml:apply>
																					<ml:matcol/>
																					<ml:id xml:space="preserve">J</ml:id>
																					<ml:id xml:space="preserve">i</ml:id>
																				</ml:apply>
																				<ml:apply>
																					<ml:matcol/>
																					<ml:parens>
																						<ml:apply>
																							<ml:id xml:space="preserve">identity</ml:id>
																							<ml:id xml:space="preserve">μ</ml:id>
																						</ml:apply>
																					</ml:parens>
																					<ml:parens>
																						<ml:apply>
																							<ml:indexer/>
																							<ml:id xml:space="preserve" subscript="off">RI</ml:id>
																							<ml:id xml:space="preserve">i</ml:id>
																						</ml:apply>
																					</ml:parens>
																				</ml:apply>
																			</ml:localDefine>
																		</ml:for>
																		<ml:ifThen>
																			<ml:apply>
																				<ml:equal/>
																				<ml:id xml:space="preserve" subscript="noIN">N</ml:id>
																				<ml:real>1</ml:real>
																			</ml:apply>
																			<ml:program>
																				<ml:localDefine>
																					<ml:id xml:space="preserve" subscript="rot">J</ml:id>
																					<ml:apply>
																						<ml:mult/>
																						<ml:id xml:space="preserve" subscript="matrix">R</ml:id>
																						<ml:id xml:space="preserve">J</ml:id>
																					</ml:apply>
																				</ml:localDefine>
																				<ml:localDefine>
																					<ml:id xml:space="preserve">J</ml:id>
																					<ml:apply>
																						<ml:id xml:space="preserve">augment</ml:id>
																						<ml:sequence>
																							<ml:id xml:space="preserve">J</ml:id>
																							<ml:id xml:space="preserve" subscript="rot">J</ml:id>
																						</ml:sequence>
																					</ml:apply>
																				</ml:localDefine>
																			</ml:program>
																		</ml:ifThen>
																		<ml:apply>
																			<ml:transpose/>
																			<ml:id xml:space="preserve">J</ml:id>
																		</ml:apply>
																	</ml:program>
																</ml:localDefine>
																<ml:localDefine>
																	<ml:id xml:space="preserve">Y</ml:id>
																	<ml:apply>
																		<ml:mult/>
																		<ml:id xml:space="preserve" subscript="s">M</ml:id>
																		<ml:parens>
																			<ml:id xml:space="preserve">Y</ml:id>
																		</ml:parens>
																	</ml:apply>
																</ml:localDefine>
																<ml:localDefine>
																	<ml:id xml:space="preserve">μ</ml:id>
																	<ml:apply>
																		<ml:id xml:space="preserve">rows</ml:id>
																		<ml:id xml:space="preserve" subscript="s">M</ml:id>
																	</ml:apply>
																</ml:localDefine>
															</ml:program>
														</ml:ifThen>
														<ml:id xml:space="preserve">Y</ml:id>
													</ml:program>
												</ml:ifThen>
											</ml:program>
										</ml:localDefine>
										<ml:localDefine>
											<ml:apply>
												<ml:indexer/>
												<ml:id xml:space="preserve" subscript="m">Stat</ml:id>
												<ml:id xml:space="preserve">run</ml:id>
											</ml:apply>
											<ml:id xml:space="preserve">μ</ml:id>
										</ml:localDefine>
										<ml:localDefine>
											<ml:id xml:space="preserve">W</ml:id>
											<ml:apply>
												<ml:mult/>
												<ml:apply>
													<ml:mult/>
													<ml:apply>
														<ml:div/>
														<ml:real>1</ml:real>
														<ml:id xml:space="preserve">n</ml:id>
													</ml:apply>
													<ml:id xml:space="preserve">y</ml:id>
												</ml:apply>
												<ml:apply>
													<ml:transpose/>
													<ml:parens>
														<ml:apply>
															<ml:conjugate/>
															<ml:id xml:space="preserve">y</ml:id>
														</ml:apply>
													</ml:parens>
												</ml:apply>
											</ml:apply>
										</ml:localDefine>
										<ml:localDefine>
											<ml:id xml:space="preserve">λ</ml:id>
											<ml:apply>
												<ml:id xml:space="preserve">reverse</ml:id>
												<ml:apply>
													<ml:id xml:space="preserve">sort</ml:id>
													<ml:apply>
														<ml:id xml:space="preserve">eigenvals</ml:id>
														<ml:id xml:space="preserve">W</ml:id>
													</ml:apply>
												</ml:apply>
											</ml:apply>
										</ml:localDefine>
										<ml:ifThen>
											<ml:apply>
												<ml:equal/>
												<ml:id xml:space="preserve">Detection</ml:id>
												<ml:str xml:space="preserve">GLRT</ml:str>
											</ml:apply>
											<ml:localDefine>
												<ml:id xml:space="preserve">T</ml:id>
												<ml:apply>
													<ml:div/>
													<ml:apply>
														<ml:indexer/>
														<ml:id xml:space="preserve">λ</ml:id>
														<ml:real>0</ml:real>
													</ml:apply>
													<ml:apply>
														<ml:mult/>
														<ml:apply>
															<ml:div/>
															<ml:real>1</ml:real>
															<ml:id xml:space="preserve">μ</ml:id>
														</ml:apply>
														<ml:apply>
															<ml:id xml:space="preserve">tr</ml:id>
															<ml:id xml:space="preserve">W</ml:id>
														</ml:apply>
													</ml:apply>
												</ml:apply>
											</ml:localDefine>
										</ml:ifThen>
										<ml:ifThen>
											<ml:apply>
												<ml:equal/>
												<ml:id xml:space="preserve">Detection</ml:id>
												<ml:str xml:space="preserve">ERD</ml:str>
											</ml:apply>
											<ml:localDefine>
												<ml:id xml:space="preserve">T</ml:id>
												<ml:apply>
													<ml:div/>
													<ml:apply>
														<ml:indexer/>
														<ml:id xml:space="preserve">λ</ml:id>
														<ml:real>0</ml:real>
													</ml:apply>
													<ml:apply>
														<ml:indexer/>
														<ml:id xml:space="preserve">λ</ml:id>
														<ml:apply>
															<ml:minus/>
															<ml:id xml:space="preserve">μ</ml:id>
															<ml:real>1</ml:real>
														</ml:apply>
													</ml:apply>
												</ml:apply>
											</ml:localDefine>
										</ml:ifThen>
										<ml:ifThen>
											<ml:apply>
												<ml:equal/>
												<ml:id xml:space="preserve">Detection</ml:id>
												<ml:str xml:space="preserve">RLRT</ml:str>
											</ml:apply>
											<ml:localDefine>
												<ml:id xml:space="preserve">T</ml:id>
												<ml:apply>
													<ml:div/>
													<ml:apply>
														<ml:indexer/>
														<ml:id xml:space="preserve">λ</ml:id>
														<ml:real>0</ml:real>
													</ml:apply>
													<ml:apply>
														<ml:pow/>
														<ml:parens>
															<ml:apply>
																<ml:pow/>
																<ml:real>10</ml:real>
																<ml:apply>
																	<ml:div/>
																	<ml:id xml:space="preserve">SNR</ml:id>
																	<ml:real>10</ml:real>
																</ml:apply>
															</ml:apply>
														</ml:parens>
														<ml:real>-1</ml:real>
													</ml:apply>
												</ml:apply>
											</ml:localDefine>
										</ml:ifThen>
										<ml:ifThen>
											<ml:apply>
												<ml:equal/>
												<ml:id xml:space="preserve">Detection</ml:id>
												<ml:str xml:space="preserve">ED</ml:str>
											</ml:apply>
											<ml:localDefine>
												<ml:id xml:space="preserve">T</ml:id>
												<ml:apply>
													<ml:div/>
													<ml:apply>
														<ml:mult/>
														<ml:apply>
															<ml:div/>
															<ml:real>1</ml:real>
															<ml:id xml:space="preserve">μ</ml:id>
														</ml:apply>
														<ml:apply>
															<ml:summation/>
															<ml:lambda>
																<ml:boundVars>
																	<ml:id xml:space="preserve">j</ml:id>
																</ml:boundVars>
																<ml:apply>
																	<ml:indexer/>
																	<ml:id xml:space="preserve">λ</ml:id>
																	<ml:id xml:space="preserve">j</ml:id>
																</ml:apply>
															</ml:lambda>
															<ml:bounds>
																<ml:real>0</ml:real>
																<ml:apply>
																	<ml:minus/>
																	<ml:id xml:space="preserve">μ</ml:id>
																	<ml:real>1</ml:real>
																</ml:apply>
															</ml:bounds>
														</ml:apply>
													</ml:apply>
													<ml:apply>
														<ml:pow/>
														<ml:parens>
															<ml:apply>
																<ml:pow/>
																<ml:real>10</ml:real>
																<ml:apply>
																	<ml:div/>
																	<ml:id xml:space="preserve">SNR</ml:id>
																	<ml:real>10</ml:real>
																</ml:apply>
															</ml:apply>
														</ml:parens>
														<ml:real>-1</ml:real>
													</ml:apply>
												</ml:apply>
											</ml:localDefine>
										</ml:ifThen>
										<ml:localDefine>
											<ml:id xml:space="preserve" subscript="d">Counter</ml:id>
											<ml:apply>
												<ml:plus/>
												<ml:id xml:space="preserve" subscript="d">Counter</ml:id>
												<ml:apply>
													<ml:mult/>
													<ml:parens>
														<ml:apply>
															<ml:greaterThan/>
															<ml:apply>
																<ml:absval/>
																<ml:id xml:space="preserve">T</ml:id>
															</ml:apply>
															<ml:id xml:space="preserve">γ</ml:id>
														</ml:apply>
													</ml:parens>
													<ml:id xml:space="preserve" subscript="TX">I</ml:id>
												</ml:apply>
											</ml:apply>
										</ml:localDefine>
										<ml:localDefine>
											<ml:id xml:space="preserve" subscript="fa">Counter</ml:id>
											<ml:apply>
												<ml:plus/>
												<ml:id xml:space="preserve" subscript="fa">Counter</ml:id>
												<ml:apply>
													<ml:mult/>
													<ml:parens>
														<ml:apply>
															<ml:greaterThan/>
															<ml:apply>
																<ml:absval/>
																<ml:id xml:space="preserve">T</ml:id>
															</ml:apply>
															<ml:id xml:space="preserve">γ</ml:id>
														</ml:apply>
													</ml:parens>
													<ml:apply>
														<ml:not/>
														<ml:id xml:space="preserve" subscript="TX">I</ml:id>
													</ml:apply>
												</ml:apply>
											</ml:apply>
										</ml:localDefine>
										<ml:localDefine>
											<ml:id xml:space="preserve" subscript="totalD">Counter</ml:id>
											<ml:apply>
												<ml:plus/>
												<ml:id xml:space="preserve" subscript="totalD">Counter</ml:id>
												<ml:apply>
													<ml:mult/>
													<ml:real>1</ml:real>
													<ml:id xml:space="preserve" subscript="TX">I</ml:id>
												</ml:apply>
											</ml:apply>
										</ml:localDefine>
										<ml:localDefine>
											<ml:id xml:space="preserve" subscript="totalFA">Counter</ml:id>
											<ml:apply>
												<ml:plus/>
												<ml:id xml:space="preserve" subscript="totalFA">Counter</ml:id>
												<ml:apply>
													<ml:mult/>
													<ml:real>1</ml:real>
													<ml:apply>
														<ml:not/>
														<ml:id xml:space="preserve" subscript="TX">I</ml:id>
													</ml:apply>
												</ml:apply>
											</ml:apply>
										</ml:localDefine>
									</ml:program>
								</ml:for>
								<ml:localDefine>
									<ml:id xml:space="preserve" subscript="D">P</ml:id>
									<ml:apply>
										<ml:div/>
										<ml:id xml:space="preserve" subscript="d">Counter</ml:id>
										<ml:id xml:space="preserve" subscript="totalD">Counter</ml:id>
									</ml:apply>
								</ml:localDefine>
								<ml:localDefine>
									<ml:id xml:space="preserve" subscript="FA">P</ml:id>
									<ml:apply>
										<ml:div/>
										<ml:id xml:space="preserve" subscript="fa">Counter</ml:id>
										<ml:id xml:space="preserve" subscript="totalFA">Counter</ml:id>
									</ml:apply>
								</ml:localDefine>
								<ml:apply>
									<ml:transpose/>
									<ml:matrix rows="1" cols="4">
										<ml:id xml:space="preserve" subscript="D">P</ml:id>
										<ml:id xml:space="preserve" subscript="FA">P</ml:id>
										<ml:id xml:space="preserve" subscript="m">Stat</ml:id>
										<ml:real>0</ml:real>
									</ml:matrix>
								</ml:apply>
							</ml:program>
						</ml:define>
					</math>
				</region>
				<region region-id="6832" left="6" top="4461.6" width="61.8" height="16.2" align-x="15.6" align-y="4470.6" show-border="false" show-highlight="false" is-protected="true" z-order="0" background-color="inherit" tag="">
					<math optimize="false" disable-calc="false">
						<ml:define xmlns:ml="http://schemas.mathsoft.com/math30">
							<ml:id xml:space="preserve">i</ml:id>
							<ml:range>
								<ml:real>0</ml:real>
								<ml:apply>
									<ml:minus/>
									<ml:id xml:space="preserve" subscript="pt">N</ml:id>
									<ml:real>1</ml:real>
								</ml:apply>
							</ml:range>
						</ml:define>
					</math>
				</region>
				<region region-id="6833" left="114" top="4451.4" width="132.6" height="34.2" align-x="129.6" align-y="4470.6" show-border="false" show-highlight="false" is-protected="true" z-order="0" background-color="inherit" tag="">
					<math optimize="false" disable-calc="false">
						<ml:define xmlns:ml="http://schemas.mathsoft.com/math30">
							<ml:apply>
								<ml:indexer/>
								<ml:id xml:space="preserve">γ</ml:id>
								<ml:id xml:space="preserve">i</ml:id>
							</ml:apply>
							<ml:apply>
								<ml:plus/>
								<ml:apply>
									<ml:div/>
									<ml:apply>
										<ml:mult/>
										<ml:parens>
											<ml:apply>
												<ml:minus/>
												<ml:id xml:space="preserve" subscript="max">γ</ml:id>
												<ml:id xml:space="preserve" subscript="min">γ</ml:id>
											</ml:apply>
										</ml:parens>
										<ml:parens>
											<ml:id xml:space="preserve">i</ml:id>
										</ml:parens>
									</ml:apply>
									<ml:apply>
										<ml:minus/>
										<ml:id xml:space="preserve" subscript="pt">N</ml:id>
										<ml:real>1</ml:real>
									</ml:apply>
								</ml:apply>
								<ml:id xml:space="preserve" subscript="min">γ</ml:id>
							</ml:apply>
						</ml:define>
					</math>
				</region>
				<region region-id="6834" left="6" top="4497.6" width="84" height="14.4" align-x="22.2" align-y="4506.6" show-border="true" show-highlight="false" is-protected="true" z-order="0" background-color="inherit" tag="">
					<math optimize="false" disable-calc="false">
						<ml:define xmlns:ml="http://schemas.mathsoft.com/math30">
							<ml:apply>
								<ml:indexer/>
								<ml:id xml:space="preserve">P</ml:id>
								<ml:id xml:space="preserve">i</ml:id>
							</ml:apply>
							<ml:apply>
								<ml:id xml:space="preserve">OUT</ml:id>
								<ml:sequence>
									<ml:apply>
										<ml:indexer/>
										<ml:id xml:space="preserve">γ</ml:id>
										<ml:id xml:space="preserve">i</ml:id>
									</ml:apply>
									<ml:id xml:space="preserve">SNR</ml:id>
								</ml:sequence>
							</ml:apply>
						</ml:define>
					</math>
				</region>
				<region region-id="6835" left="120" top="4497.6" width="52.8" height="20.4" align-x="142.8" align-y="4506.6" show-border="false" show-highlight="false" is-protected="true" z-order="0" background-color="inherit" tag="">
					<math optimize="false" disable-calc="false">
						<ml:define xmlns:ml="http://schemas.mathsoft.com/math30">
							<ml:apply>
								<ml:indexer/>
								<ml:id xml:space="preserve" subscript="D">P</ml:id>
								<ml:id xml:space="preserve">i</ml:id>
							</ml:apply>
							<ml:apply>
								<ml:indexer/>
								<ml:parens>
									<ml:apply>
										<ml:indexer/>
										<ml:id xml:space="preserve">P</ml:id>
										<ml:id xml:space="preserve">i</ml:id>
									</ml:apply>
								</ml:parens>
								<ml:real>0</ml:real>
							</ml:apply>
						</ml:define>
					</math>
				</region>
				<region region-id="6836" left="204" top="4497.6" width="58.2" height="20.4" align-x="232.2" align-y="4506.6" show-border="false" show-highlight="false" is-protected="true" z-order="0" background-color="inherit" tag="">
					<math optimize="false" disable-calc="false">
						<ml:define xmlns:ml="http://schemas.mathsoft.com/math30">
							<ml:apply>
								<ml:indexer/>
								<ml:id xml:space="preserve" subscript="FA">P</ml:id>
								<ml:id xml:space="preserve">i</ml:id>
							</ml:apply>
							<ml:apply>
								<ml:indexer/>
								<ml:parens>
									<ml:apply>
										<ml:indexer/>
										<ml:id xml:space="preserve">P</ml:id>
										<ml:id xml:space="preserve">i</ml:id>
									</ml:apply>
								</ml:parens>
								<ml:real>1</ml:real>
							</ml:apply>
						</ml:define>
					</math>
				</region>
			</area>
			<rendering item-idref="26"/>
		</region>
		<region region-id="6642" left="6" top="1023" width="580.2" height="11.4" align-x="25.8" align-y="1032" show-border="false" show-highlight="false" is-protected="true" z-order="0" background-color="inherit" tag="">
			<text use-page-width="false" push-down="false" lock-width="true">
				<p style="Normal" margin-left="inherit" margin-right="inherit" text-indent="inherit" text-align="inherit" list-style-type="inherit" tabs="inherit">
					<b>***** RESULTS<sp count="2"/>****************************************************************************************************************************************</b>
				</p>
			</text>
		</region>
		<region region-id="6750" left="306" top="1056" width="273.6" height="324" align-x="306" align-y="1056" show-border="false" show-highlight="false" is-protected="true" z-order="0" background-color="inherit" tag="">
			<plot disable-calc="false" item-idref="27"/>
			<rendering item-idref="28"/>
		</region>
		<region region-id="6644" left="6" top="1062" width="273.6" height="324" align-x="6" align-y="1062" show-border="false" show-highlight="false" is-protected="true" z-order="0" background-color="inherit" tag="">
			<plot disable-calc="false" item-idref="29"/>
			<rendering item-idref="30"/>
		</region>
		<region region-id="6778" left="612" top="1119.6" width="246.6" height="186" align-x="697.8" align-y="1212" show-border="false" show-highlight="false" is-protected="true" z-order="0" background-color="inherit" tag="">
			<math optimize="false" disable-calc="false">
				<ml:eval placeholderMultiplicationStyle="default" xmlns:ml="http://schemas.mathsoft.com/math30">
					<ml:apply>
						<ml:id xml:space="preserve">augment</ml:id>
						<ml:sequence>
							<ml:id xml:space="preserve" subscript="FA">P</ml:id>
							<ml:id xml:space="preserve" subscript="D">P</ml:id>
						</ml:sequence>
					</ml:apply>
					<result xmlns="http://schemas.mathsoft.com/math30">
						<ml:matrix rows="10" cols="2">
							<ml:real>1</ml:real>
							<ml:real>0.99191919191919187</ml:real>
							<ml:real>0.83333333333333337</ml:real>
							<ml:real>0.62061855670103094</ml:real>
							<ml:real>0.33266533066132264</ml:real>
							<ml:real>0.11992263056092843</ml:real>
							<ml:real>0.046</ml:real>
							<ml:real>0.012024048096192385</ml:real>
							<ml:real>0.0087145969498910684</ml:real>
							<ml:real>0</ml:real>
							<ml:real>1</ml:real>
							<ml:real>0.994059405940594</ml:real>
							<ml:real>0.940677966101695</ml:real>
							<ml:real>0.75728155339805825</ml:real>
							<ml:real>0.45908183632734528</ml:real>
							<ml:real>0.21325051759834368</ml:real>
							<ml:real>0.076</ml:real>
							<ml:real>0.015968063872255488</ml:real>
							<ml:real>0.009242144177449169</ml:real>
							<ml:real>0</ml:real>
						</ml:matrix>
					</result>
				</ml:eval>
				<resultFormat>
					<table item-idref="31"/>
				</resultFormat>
			</math>
			<rendering item-idref="32"/>
		</region>
		<region region-id="6777" left="6" top="1413" width="580.2" height="11.4" align-x="25.8" align-y="1422" show-border="false" show-highlight="false" is-protected="true" z-order="0" background-color="inherit" tag="">
			<text use-page-width="false" push-down="false" lock-width="true">
				<p style="Normal" margin-left="inherit" margin-right="inherit" text-indent="inherit" text-align="inherit" list-style-type="inherit" tabs="inherit">
					<b>***** SUMMARY OF PARAMETERS *********************************************************************************************************************</b>
				</p>
			</text>
		</region>
		<region region-id="6751" left="6" top="1455" width="105.6" height="16.2" align-x="84" align-y="1464" show-border="false" show-highlight="false" is-protected="true" z-order="0" background-color="inherit" tag="">
			<math optimize="false" disable-calc="false">
				<ml:eval placeholderMultiplicationStyle="default" xmlns:ml="http://schemas.mathsoft.com/math30">
					<ml:id xml:space="preserve" subscript="countermeasure">IN</ml:id>
					<result xmlns="http://schemas.mathsoft.com/math30">
						<ml:str xml:space="preserve">N</ml:str>
					</result>
				</ml:eval>
			</math>
			<rendering item-idref="33"/>
		</region>
		<region region-id="6779" left="6" top="1479" width="87.6" height="12.6" align-x="49.8" align-y="1488" show-border="false" show-highlight="false" is-protected="true" z-order="0" background-color="inherit" tag="">
			<math optimize="false" disable-calc="false">
				<ml:eval placeholderMultiplicationStyle="default" xmlns:ml="http://schemas.mathsoft.com/math30">
					<ml:id xml:space="preserve">Detection</ml:id>
					<result xmlns="http://schemas.mathsoft.com/math30">
						<ml:str xml:space="preserve">GLRT</ml:str>
					</result>
				</ml:eval>
			</math>
			<rendering item-idref="34"/>
		</region>
		<region region-id="6780" left="120" top="1479" width="60.6" height="16.2" align-x="138.6" align-y="1488" show-border="false" show-highlight="false" is-protected="true" z-order="0" background-color="inherit" tag="">
			<math optimize="false" disable-calc="false">
				<ml:eval placeholderMultiplicationStyle="default" xmlns:ml="http://schemas.mathsoft.com/math30">
					<ml:id xml:space="preserve" subscript="tx">S</ml:id>
					<result xmlns="http://schemas.mathsoft.com/math30">
						<ml:str xml:space="preserve">Noise</ml:str>
					</result>
				</ml:eval>
			</math>
			<rendering item-idref="35"/>
		</region>
		<region region-id="6781" left="210" top="1479" width="58.2" height="12.6" align-x="241.2" align-y="1488" show-border="false" show-highlight="false" is-protected="true" z-order="0" background-color="inherit" tag="">
			<math optimize="false" disable-calc="false">
				<ml:eval placeholderMultiplicationStyle="default" xmlns:ml="http://schemas.mathsoft.com/math30">
					<ml:id xml:space="preserve">Model</ml:id>
					<result xmlns="http://schemas.mathsoft.com/math30">
						<ml:str xml:space="preserve">C</ml:str>
					</result>
				</ml:eval>
			</math>
			<rendering item-idref="36"/>
		</region>
		<region region-id="6755" left="6" top="1502.4" width="181.8" height="13.2" align-x="21.6" align-y="1512" show-border="false" show-highlight="false" is-protected="true" z-order="0" background-color="inherit" tag="">
			<text use-page-width="false" push-down="false" lock-width="true">
				<p style="Normal" margin-left="inherit" margin-right="inherit" text-indent="inherit" text-align="inherit" list-style-type="inherit" tabs="inherit">Number of cognitive radios:<sp count="4"/>
					<region region-id="6849" left="129.6" top="1503" width="31.2" height="12.6" align-x="142.8" align-y="1512" show-border="false" show-highlight="false" is-protected="true" z-order="0" background-color="inherit" tag="">
						<math optimize="false" disable-calc="false">
							<ml:eval placeholderMultiplicationStyle="default" xmlns:ml="http://schemas.mathsoft.com/math30">
								<ml:id xml:space="preserve">m</ml:id>
								<result xmlns="http://schemas.mathsoft.com/math30">
									<ml:real>6</ml:real>
								</result>
							</ml:eval>
						</math>
						<rendering item-idref="37"/>
					</region>
				</p>
			</text>
		</region>
		<region region-id="6757" left="6" top="1526.4" width="210.6" height="13.2" align-x="21.6" align-y="1536" show-border="false" show-highlight="false" is-protected="true" z-order="0" background-color="inherit" tag="">
			<text use-page-width="false" push-down="false" lock-width="true">
				<p style="Normal" margin-left="inherit" margin-right="inherit" text-indent="inherit" text-align="inherit" list-style-type="inherit" tabs="inherit">Number of m-element sample vectors:<sp count="5"/>
					<region region-id="6850" left="175.2" top="1527" width="33.6" height="12.6" align-x="186" align-y="1536" show-border="false" show-highlight="false" is-protected="true" z-order="0" background-color="inherit" tag="">
						<math optimize="false" disable-calc="false">
							<ml:eval placeholderMultiplicationStyle="default" xmlns:ml="http://schemas.mathsoft.com/math30">
								<ml:id xml:space="preserve">n</ml:id>
								<result xmlns="http://schemas.mathsoft.com/math30">
									<ml:real>50</ml:real>
								</result>
							</ml:eval>
						</math>
						<rendering item-idref="38"/>
					</region>
				</p>
			</text>
		</region>
		<region region-id="6759" left="6" top="1550.4" width="162" height="13.2" align-x="21.6" align-y="1560" show-border="false" show-highlight="false" is-protected="true" z-order="0" background-color="inherit" tag="">
			<text use-page-width="false" push-down="false" lock-width="true">
				<p style="Normal" margin-left="inherit" margin-right="inherit" text-indent="inherit" text-align="inherit" list-style-type="inherit" tabs="inherit">Number of primary radios:<sp count="4"/>
					<region region-id="6851" left="123.6" top="1551" width="30" height="12.6" align-x="135.6" align-y="1560" show-border="false" show-highlight="false" is-protected="true" z-order="0" background-color="inherit" tag="">
						<math optimize="false" disable-calc="false">
							<ml:eval placeholderMultiplicationStyle="default" xmlns:ml="http://schemas.mathsoft.com/math30">
								<ml:id xml:space="preserve">p</ml:id>
								<result xmlns="http://schemas.mathsoft.com/math30">
									<ml:real>1</ml:real>
								</result>
							</ml:eval>
						</math>
						<rendering item-idref="39"/>
					</region>
				</p>
			</text>
		</region>
		<region region-id="6761" left="6" top="1574.4" width="195.6" height="16.8" align-x="21.6" align-y="1584" show-border="false" show-highlight="false" is-protected="true" z-order="0" background-color="inherit" tag="">
			<text use-page-width="false" push-down="false" lock-width="true">
				<p style="Normal" margin-left="inherit" margin-right="inherit" text-indent="inherit" text-align="inherit" list-style-type="inherit" tabs="inherit">Number of IN bursts:<sp count="4"/>
					<region region-id="5587" left="99.6" top="1575" width="36" height="16.2" align-x="117.6" align-y="1584" show-border="false" show-highlight="false" is-protected="true" z-order="0" background-color="inherit" tag="">
						<math optimize="false" disable-calc="false">
							<ml:eval placeholderMultiplicationStyle="default" xmlns:ml="http://schemas.mathsoft.com/math30">
								<ml:id xml:space="preserve" subscript="b">N</ml:id>
								<result xmlns="http://schemas.mathsoft.com/math30">
									<ml:real>1</ml:real>
								</result>
							</ml:eval>
						</math>
						<rendering item-idref="40"/>
					</region>
				</p>
			</text>
		</region>
		<region region-id="6762" left="6" top="1598.4" width="249.6" height="16.8" align-x="21.6" align-y="1608" show-border="false" show-highlight="false" is-protected="true" z-order="0" background-color="inherit" tag="">
			<text use-page-width="false" push-down="false" lock-width="true">
				<p style="Normal" margin-left="inherit" margin-right="inherit" text-indent="inherit" text-align="inherit" list-style-type="inherit" tabs="inherit">Number of samples per IN burst:<sp count="4"/>
					<region region-id="5588" left="148.8" top="1599" width="39.6" height="16.2" align-x="165.6" align-y="1608" show-border="false" show-highlight="false" is-protected="true" z-order="0" background-color="inherit" tag="">
						<math optimize="false" disable-calc="false">
							<ml:eval placeholderMultiplicationStyle="default" xmlns:ml="http://schemas.mathsoft.com/math30">
								<ml:id xml:space="preserve" subscript="s">N</ml:id>
								<result xmlns="http://schemas.mathsoft.com/math30">
									<ml:real>10</ml:real>
								</result>
							</ml:eval>
						</math>
						<rendering item-idref="41"/>
					</region>
				</p>
			</text>
		</region>
		<region region-id="6763" left="6" top="1622.4" width="207.6" height="13.2" align-x="18.6" align-y="1632" show-border="false" show-highlight="false" is-protected="true" z-order="0" background-color="inherit" tag="">
			<text use-page-width="false" push-down="false" lock-width="true">
				<p style="Normal" margin-left="inherit" margin-right="inherit" text-indent="inherit" text-align="inherit" list-style-type="inherit" tabs="inherit">Signal-to-thermal noise ratio:<sp count="4"/>
					<region region-id="2434" left="135" top="1623" width="51" height="12.6" align-x="157.8" align-y="1632" show-border="false" show-highlight="false" is-protected="true" z-order="0" background-color="inherit" tag="">
						<math optimize="false" disable-calc="false">
							<ml:eval placeholderMultiplicationStyle="default" xmlns:ml="http://schemas.mathsoft.com/math30">
								<ml:id xml:space="preserve">SNR</ml:id>
								<result xmlns="http://schemas.mathsoft.com/math30">
									<ml:real>-10</ml:real>
								</result>
							</ml:eval>
						</math>
						<rendering item-idref="42"/>
					</region>
					<f family="Arial" charset="0" size="10">
						<inlineAttr font-weight="normal" font-style="normal" underline="false" line-through="false">
							<sp count="2"/>dB</inlineAttr>
					</f>
				</p>
			</text>
		</region>
		<region region-id="6764" left="6" top="1646.4" width="204.6" height="13.2" align-x="21" align-y="1656" show-border="false" show-highlight="false" is-protected="true" z-order="0" background-color="inherit" tag="">
			<text use-page-width="false" push-down="false" lock-width="true">
				<p style="Normal" margin-left="inherit" margin-right="inherit" text-indent="inherit" text-align="inherit" list-style-type="inherit" tabs="inherit">Impulsive/Thermal noise power ratio: <region region-id="1594" left="159.6" top="1647" width="31.8" height="12.6" align-x="173.4" align-y="1656" show-border="false" show-highlight="false" is-protected="true" z-order="0" background-color="inherit" tag="">
						<math optimize="false" disable-calc="false">
							<ml:eval placeholderMultiplicationStyle="default" xmlns:ml="http://schemas.mathsoft.com/math30">
								<ml:id xml:space="preserve">K</ml:id>
								<result xmlns="http://schemas.mathsoft.com/math30">
									<ml:real>1</ml:real>
								</result>
							</ml:eval>
						</math>
						<rendering item-idref="43"/>
					</region>
					<sp count="4"/>
				</p>
			</text>
		</region>
		<region region-id="6765" left="6" top="1670.4" width="240" height="16.8" align-x="29.4" align-y="1680" show-border="false" show-highlight="false" is-protected="true" z-order="0" background-color="inherit" tag="">
			<text use-page-width="false" push-down="false" lock-width="true">
				<p style="Normal" margin-left="inherit" margin-right="inherit" text-indent="inherit" text-align="inherit" list-style-type="inherit" tabs="inherit">Probability of IN ocurrence:<sp count="4"/>
					<region region-id="3218" left="127.2" top="1671" width="48" height="16.2" align-x="150" align-y="1680" show-border="false" show-highlight="false" is-protected="true" z-order="0" background-color="inherit" tag="">
						<math optimize="false" disable-calc="false">
							<ml:eval placeholderMultiplicationStyle="default" xmlns:ml="http://schemas.mathsoft.com/math30">
								<ml:id xml:space="preserve" subscript="IN">p</ml:id>
								<result xmlns="http://schemas.mathsoft.com/math30">
									<ml:real>0.8</ml:real>
								</result>
							</ml:eval>
						</math>
						<rendering item-idref="44"/>
					</region>
				</p>
			</text>
		</region>
		<region region-id="6766" left="6" top="1694.4" width="265.8" height="16.8" align-x="29.4" align-y="1704" show-border="false" show-highlight="false" is-protected="true" z-order="0" background-color="inherit" tag="">
			<text use-page-width="false" push-down="false" lock-width="true">
				<p style="Normal" margin-left="inherit" margin-right="inherit" text-indent="inherit" text-align="inherit" list-style-type="inherit" tabs="inherit">Average fraction of CRs hit by IN:<sp count="4"/>
					<region region-id="5589" left="152.4" top="1695" width="49.2" height="16.2" align-x="176.4" align-y="1704" show-border="false" show-highlight="false" is-protected="true" z-order="0" background-color="inherit" tag="">
						<math optimize="false" disable-calc="false">
							<ml:eval placeholderMultiplicationStyle="default" xmlns:ml="http://schemas.mathsoft.com/math30">
								<ml:id xml:space="preserve" subscript="CR">p</ml:id>
								<result xmlns="http://schemas.mathsoft.com/math30">
									<ml:real>0.7</ml:real>
								</result>
							</ml:eval>
						</math>
						<rendering item-idref="45"/>
					</region>
				</p>
			</text>
		</region>
		<region region-id="6767" left="6" top="1718.4" width="155.4" height="16.8" align-x="25.8" align-y="1728" show-border="false" show-highlight="false" is-protected="true" z-order="0" background-color="inherit" tag="">
			<text use-page-width="false" push-down="false" lock-width="true">
				<p style="Normal" margin-left="inherit" margin-right="inherit" text-indent="inherit" text-align="inherit" list-style-type="inherit" tabs="inherit">ADC overdrive factor:<sp count="3"/>
					<region region-id="4107" left="103.2" top="1719" width="46.2" height="16.2" align-x="124.2" align-y="1728" show-border="false" show-highlight="false" is-protected="true" z-order="0" background-color="inherit" tag="">
						<math optimize="false" disable-calc="false">
							<ml:eval placeholderMultiplicationStyle="default" xmlns:ml="http://schemas.mathsoft.com/math30">
								<ml:id xml:space="preserve" subscript="od">f</ml:id>
								<result xmlns="http://schemas.mathsoft.com/math30">
									<ml:real>1.2</ml:real>
								</result>
							</ml:eval>
						</math>
						<rendering item-idref="46"/>
					</region>
					<sp count="3"/>
				</p>
			</text>
		</region>
		<region region-id="6768" left="6" top="1742.4" width="261" height="16.8" align-x="21.6" align-y="1752" show-border="false" show-highlight="false" is-protected="true" z-order="0" background-color="inherit" tag="">
			<text use-page-width="false" push-down="false" lock-width="true">
				<p style="Normal" margin-left="inherit" margin-right="inherit" text-indent="inherit" text-align="inherit" list-style-type="inherit" tabs="inherit">Number of quantization levels of the ADC:<sp count="2"/>
					<region region-id="5172" left="182.4" top="1743" width="36" height="16.2" align-x="200.4" align-y="1752" show-border="false" show-highlight="false" is-protected="true" z-order="0" background-color="inherit" tag="">
						<math optimize="false" disable-calc="false">
							<ml:eval placeholderMultiplicationStyle="default" xmlns:ml="http://schemas.mathsoft.com/math30">
								<ml:id xml:space="preserve" subscript="q">N</ml:id>
								<result xmlns="http://schemas.mathsoft.com/math30">
									<ml:real>8</ml:real>
								</result>
							</ml:eval>
						</math>
						<rendering item-idref="47"/>
					</region>
				</p>
			</text>
		</region>
		<region region-id="6769" left="6" top="1766.4" width="264" height="16.8" align-x="21.6" align-y="1776" show-border="false" show-highlight="false" is-protected="true" z-order="0" background-color="inherit" tag="">
			<text use-page-width="false" push-down="false" lock-width="true">
				<p style="Normal" margin-left="inherit" margin-right="inherit" text-indent="inherit" text-align="inherit" list-style-type="inherit" tabs="inherit">Number of simulation runs:<sp count="2"/>
					<region region-id="5198" left="120.6" top="1767" width="62.4" height="16.2" align-x="150.6" align-y="1776" show-border="false" show-highlight="false" is-protected="true" z-order="0" background-color="inherit" tag="">
						<math optimize="false" disable-calc="false">
							<ml:eval placeholderMultiplicationStyle="default" xmlns:ml="http://schemas.mathsoft.com/math30">
								<ml:id xml:space="preserve" subscript="runs">N</ml:id>
								<result xmlns="http://schemas.mathsoft.com/math30">
									<ml:real>1000</ml:real>
								</result>
							</ml:eval>
							<resultFormat numeric-only="true">
								<general precision="3" show-trailing-zeros="false" radix="dec" complex-threshold="10" zero-threshold="15" imaginary-value="i" exponential-threshold="5"/>
								<matrix display-style="auto" expand-nested-arrays="false"/>
								<unit format-units="true" simplify-units="true" fractional-unit-exponent="false"/>
							</resultFormat>
						</math>
						<rendering item-idref="48"/>
					</region>
					<sp/>
				</p>
			</text>
		</region>
		<region region-id="6770" left="6" top="1785.6" width="354.6" height="18" align-x="12" align-y="1800" show-border="false" show-highlight="false" is-protected="true" z-order="0" background-color="inherit" tag="">
			<text use-page-width="false" push-down="false" lock-width="true">
				<p style="Normal" margin-left="0" margin-right="0" text-indent="inherit" text-align="left" list-style-type="inherit" tabs="inherit">Thresholds: <region region-id="4952" left="56.4" top="1786.2" width="212.4" height="17.4" align-x="73.8" align-y="1800" show-border="false" show-highlight="false" is-protected="true" z-order="0" background-color="inherit" tag="">
						<math optimize="false" disable-calc="false">
							<ml:eval placeholderMultiplicationStyle="default" xmlns:ml="http://schemas.mathsoft.com/math30">
								<ml:apply>
									<ml:transpose/>
									<ml:id xml:space="preserve">γ</ml:id>
								</ml:apply>
								<result xmlns="http://schemas.mathsoft.com/math30">
									<ml:matrix rows="1" cols="10">
										<ml:real>1.3</ml:real>
										<ml:real>1.4000000000000001</ml:real>
										<ml:real>1.5</ml:real>
										<ml:real>1.6</ml:real>
										<ml:real>1.7000000000000002</ml:real>
										<ml:real>1.8000000000000003</ml:real>
										<ml:real>1.9000000000000001</ml:real>
										<ml:real>2</ml:real>
										<ml:real>2.1</ml:real>
										<ml:real>2.2</ml:real>
									</ml:matrix>
								</result>
							</ml:eval>
							<resultFormat numeric-only="true">
								<general precision="3" show-trailing-zeros="false" radix="dec" complex-threshold="10" zero-threshold="15" imaginary-value="i" exponential-threshold="3"/>
								<matrix display-style="matrix" expand-nested-arrays="false"/>
								<unit format-units="true" simplify-units="true" fractional-unit-exponent="false"/>
							</resultFormat>
						</math>
						<rendering item-idref="49"/>
					</region>
					<f family="Arial" charset="0" size="10">
						<inlineAttr font-weight="normal" font-style="normal" underline="false" line-through="false">
							<sp count="2"/>
						</inlineAttr>
					</f>
					<sp/>
				</p>
			</text>
		</region>
		<region region-id="6771" left="6" top="1814.4" width="267.6" height="13.2" align-x="19.8" align-y="1824" show-border="false" show-highlight="false" is-protected="true" z-order="0" background-color="inherit" tag="">
			<text use-page-width="false" push-down="false" lock-width="true">
				<p style="Normal" margin-left="inherit" margin-right="inherit" text-indent="inherit" text-align="inherit" list-style-type="inherit" tabs="inherit">Lenght of the impulse reponse of the receive filter:<sp count="4"/>
					<region region-id="5590" left="220.8" top="1815" width="34.8" height="12.6" align-x="232.8" align-y="1824" show-border="false" show-highlight="false" is-protected="true" z-order="0" background-color="inherit" tag="">
						<math optimize="false" disable-calc="false">
							<ml:eval placeholderMultiplicationStyle="default" xmlns:ml="http://schemas.mathsoft.com/math30">
								<ml:id xml:space="preserve">L</ml:id>
								<result xmlns="http://schemas.mathsoft.com/math30">
									<ml:real>10</ml:real>
								</result>
							</ml:eval>
						</math>
						<rendering item-idref="50"/>
					</region>
					<sp count="2"/>
				</p>
			</text>
		</region>
		<region region-id="6772" left="6" top="1833.6" width="312.6" height="18" align-x="21" align-y="1848" show-border="false" show-highlight="false" is-protected="true" z-order="0" background-color="inherit" tag="">
			<text use-page-width="false" push-down="false" lock-width="true">
				<p style="Normal" margin-left="inherit" margin-right="inherit" text-indent="inherit" text-align="inherit" list-style-type="inherit" tabs="inherit">Impulse response of the receive filter:<sp count="2"/>
					<region region-id="5490" left="164.4" top="1834.2" width="146.4" height="17.4" align-x="180.6" align-y="1848" show-border="false" show-highlight="false" is-protected="true" z-order="0" background-color="inherit" tag="">
						<math optimize="false" disable-calc="false">
							<ml:eval placeholderMultiplicationStyle="default" xmlns:ml="http://schemas.mathsoft.com/math30">
								<ml:apply>
									<ml:transpose/>
									<ml:id xml:space="preserve">h</ml:id>
								</ml:apply>
								<result xmlns="http://schemas.mathsoft.com/math30">
									<ml:matrix rows="1" cols="10">
										<ml:real>1</ml:real>
										<ml:real>1</ml:real>
										<ml:real>1</ml:real>
										<ml:real>1</ml:real>
										<ml:real>1</ml:real>
										<ml:real>1</ml:real>
										<ml:real>1</ml:real>
										<ml:real>1</ml:real>
										<ml:real>1</ml:real>
										<ml:real>1</ml:real>
									</ml:matrix>
								</result>
							</ml:eval>
							<resultFormat numeric-only="true">
								<general precision="3" show-trailing-zeros="false" radix="dec" complex-threshold="10" zero-threshold="15" imaginary-value="i" exponential-threshold="3"/>
								<matrix display-style="matrix" expand-nested-arrays="false"/>
								<unit format-units="true" simplify-units="true" fractional-unit-exponent="false"/>
							</resultFormat>
						</math>
						<rendering item-idref="51"/>
					</region>
					<sp count="3"/>
				</p>
			</text>
		</region>
		<region region-id="6773" left="6" top="1862.4" width="549" height="19.2" align-x="22.2" align-y="1872" show-border="false" show-highlight="false" is-protected="true" z-order="0" background-color="inherit" tag="">
			<text use-page-width="false" push-down="false" lock-width="true">
				<p style="Normal" margin-left="inherit" margin-right="inherit" text-indent="inherit" text-align="inherit" list-style-type="inherit" tabs="inherit">Estimated average number of CRs in cooperation (equal to m for no IN countermeasure ,"N", or muting, "M")<inlineAttr font-weight="normal">:<sp count="4"/>
					</inlineAttr>
					<region region-id="6629" left="463.2" top="1863" width="77.4" height="18.6" align-x="522.6" align-y="1872" show-border="false" show-highlight="false" is-protected="true" z-order="0" background-color="inherit" tag="">
						<math optimize="false" disable-calc="false">
							<ml:eval placeholderMultiplicationStyle="default" xmlns:ml="http://schemas.mathsoft.com/math30">
								<ml:apply>
									<ml:id xml:space="preserve">mean</ml:id>
									<ml:apply>
										<ml:indexer/>
										<ml:parens>
											<ml:apply>
												<ml:indexer/>
												<ml:id xml:space="preserve">P</ml:id>
												<ml:real>0</ml:real>
											</ml:apply>
										</ml:parens>
										<ml:real>2</ml:real>
									</ml:apply>
								</ml:apply>
								<result xmlns="http://schemas.mathsoft.com/math30">
									<ml:real>6</ml:real>
								</result>
							</ml:eval>
						</math>
						<rendering item-idref="52"/>
					</region>
				</p>
			</text>
		</region>
		<region region-id="6774" left="6" top="1886.4" width="473.4" height="16.8" align-x="6" align-y="1896" show-border="false" show-highlight="false" is-protected="true" z-order="0" background-color="inherit" tag="">
			<text use-page-width="false" push-down="false" lock-width="true">
				<p style="Normal" margin-left="inherit" margin-right="inherit" text-indent="0" text-align="inherit" list-style-type="none" tabs="inherit">
					<inlineAttr font-weight="normal">Theoretical average number of CRs in cooperation for the "Elimination" IN coutermeasure, "E":<sp count="5"/>
					</inlineAttr>
					<region region-id="6694" left="408" top="1887" width="54.6" height="16.2" align-x="432.6" align-y="1896" show-border="false" show-highlight="false" is-protected="true" z-order="0" background-color="inherit" tag="">
						<math optimize="false" disable-calc="false">
							<ml:eval placeholderMultiplicationStyle="default" xmlns:ml="http://schemas.mathsoft.com/math30">
								<ml:id xml:space="preserve" subscript="CR">A</ml:id>
								<result xmlns="http://schemas.mathsoft.com/math30">
									<ml:real>3.0702591999999997</ml:real>
								</result>
							</ml:eval>
						</math>
						<rendering item-idref="53"/>
					</region>
				</p>
			</text>
		</region>
		<region region-id="6853" left="6" top="1923" width="568.8" height="11.4" align-x="6" align-y="1932" show-border="false" show-highlight="false" is-protected="true" z-order="0" background-color="inherit" tag="">
			<text use-page-width="false" push-down="false" lock-width="false">
				<p style="Normal" margin-left="inherit" margin-right="inherit" text-indent="0" text-align="inherit" list-style-type="none" tabs="inherit">
					<b>**************************************************************************************************************************************************************</b>
				</p>
			</text>
		</region>
		<region region-id="1752" left="972" top="8808" width="273.6" height="233.4" align-x="972" align-y="8808" show-border="false" show-highlight="true" is-protected="true" z-order="0" background-color="inherit" tag="">
			<picture>
				<metafile mapping-mode="8" x-extent="330.7465" y-extent="281.2535" item-idref="54"/>
			</picture>
			<rendering item-idref="55"/>
		</region>
	</regions>
	<binaryContent>
		<item item-id="1" content-encoding="gzip">H4sIAAAAAAAA/4yQwW7CMAyG7aZbS9etu3AhSOUZeIIdENph2iT2ACiUAkVUTF2ROPLm3W8n
u+w0R3b+Ot/vRsmJiJGfyEy1QS228/W+c1+H9e7cta5PSGKMHGl74XqnLZog07b62Bzrqvet
ld8omqGYMF+8hWr5yty1+V7q6FjZKfKNA+tjwCKe/r/7OzzpO1fV84XRIxvAkp+JLQ+imG0E
U8kRWwNryYZtPEgnBkMDxB2Y2wuO7oURV6IMRCqMwCOZI/YMjNofwKg9B6P2R/0XxJMyEIUw
AvvrFu+Xtu6ayp38g6R67VfklhosE14uC6/5J3IpPwAAAP//AwARvY6sxgEAAA==</item>
		<item item-id="2">iVBORw0KGgoAAAANSUhEUgAAAC4AAAAVCAYAAAA5BNxZAAAAAXNSR0IArs4c6QAAAARnQU1B
AACxjwv8YQUAAAAJcEhZcwAAEnQAABJ0Ad5mH3gAAAExSURBVFhH7ZbNCcMwDIW9SKbIzRNk
iJx9zAwdwdN4GQ+jSpb8m1JaEgQBHwwViOTLe09yDcALnnjME6GJeYJrOzcV11A8+gWMMXjW
p2R8ByfAQbbgA6Ii0G7v1vbN4Ad4y1ZmZa5GKLjPz2vAsx0GXMBLKW5gW3vGWuXiYibrN4lK
/YhBcWpcwAeEthtEoBrVI+i2/hGa1fpyBvtP7gQcQgLHd7OD1dEenBrtCs4RNDZS7bBO0FLn
3z/CX4pKAh9iJx/TgbNCqHjk/y9jvqhOMdKAzkKd5kUiXSHYhgrGDX3939BdjkqK6iBWmjXc
5wW85FgUTbGRiJTY7BD9WhzRUJ4vnSpYEgNno4BTg/VHicEYi6xe23MGv38d1sjKkMtA37zH
9fI/wTXy3r5jKq6t+Bv4ZWX/Z7ALdgAAAABJRU5ErkJggg==</item>
		<item item-id="3">iVBORw0KGgoAAAANSUhEUgAAADIAAAAVCAYAAAAElr0/AAAAAXNSR0IArs4c6QAAAARnQU1B
AACxjwv8YQUAAAAJcEhZcwAAEnQAABJ0Ad5mH3gAAAFBSURBVFhH7VbLEYMgEKURq8iNCizC
M0drSAlUQzMUs2GB5Sc6xihDHA+OM6iwb99nZQBvuMPF7gACMTxAemPyYeRSRvQInDFgdIkp
CyQth/BMKBdWXTKSFopgqFjbPPUyIF6gbNpOIPzzDoGY4goGIvszSF4BxsdfGXEbxw6dMJNs
x52sMiaQASu5AaROzvFrkZFEl24DKpIBl3OjoRnPrPojkxWBcfIqpIWLqD+8O+So171AlEgM
mpp1xbTbgRFBBWZ2A8EXjT6VIDPhZgWVjX9pbHPIMzUgpKS0K/gRN4WHDuBLxki6cfEZU765
dm2XR3yUpTL6RlZ40LnS8h4wQKLpl6llozpLrUX3vU/UCKKZ2YvUqykCGQoqqcyRRfdJe5vS
Ojl+y4m+cvbfTPYjvz8dTvZjQ/UBcoT+K7+5DSMfiUVtOguWP2IAAAAASUVORK5CYII=</item>
		<item item-id="4">iVBORw0KGgoAAAANSUhEUgAAACwAAAAVCAYAAAA98QxkAAAAAXNSR0IArs4c6QAAAARnQU1B
AACxjwv8YQUAAAAJcEhZcwAAEnQAABJ0Ad5mH3gAAAEDSURBVEhL7ZbLEYQgEEQnEaPwRgQG
4ZmjMRgC0ZAMwfQyfHbVchUsUanyQHkQ5U1P00DAiJoG1QTLrC9w6Y69Cp+r8AAlCCQ6mBAO
D1a4hyQLy6MOYB+3RjUlgEPrqIU+Odf/A5sOIrRA6hFahnYUgMjx+Y7C7JsGwhqdoQGvnFBD
1mn4KzYWvXjKPvl/28C6tX6xbTXxuD4GnKPg3txNYFbGKxuGs0kD9S3g+nvHBjDbYb5pXGsz
2hcLvcYSrOYk7/yi5+/6PQss3zuOtRx20seg5meWsiVibXJwOC5vzXDS8YL3ejVVeQ+8sEPq
x3fMo9kGmXjlDpiUNR98+VmP0OqAPxpL9SES9Tz2AAAAAElFTkSuQmCC</item>
		<item item-id="5">iVBORw0KGgoAAAANSUhEUgAAADYAAAAbCAYAAAA3d3w1AAAAAXNSR0IArs4c6QAAAARnQU1B
AACxjwv8YQUAAAAJcEhZcwAAEnQAABJ0Ad5mH3gAAAHXSURBVFhH7ZjLlcMgDEXdSKrwjgpc
hNcsU8OUQDU042I0Eh8jPp7EwLGZzCxychInhKd39VA8AXzBJz6mTxRFmv6F/TZn/4pjK8hp
gokeYoEtCpYnKOGu0XW5DhM6Wub7KjumZxT3ALXliall+f27UDWimAnmNRa9KGxTMwhyJ3MF
Hc2cvPO4sBQJ9Qz0kCm4x4Iw/LBCzIxrM2iO47aA5IucPgM9zsm6p9fxxXTrsWJv6mGE5sL2
zdt+49UgJ0t43oWh+V3cr9h7PhCVCeObj/nF6sg0UNowjJrehxZ/fjegDF0UIIGERFiyeVMN
FxbNGLYV4ZgKwpEE+US34hJhK/YXa0RwDGPlhsQQBZDrvF08ZbEwveQ95KJfdMaQHGhH0bok
NaeB3kM0g8VHPZSHyK1hURoa+BEUxf3efHEDegHHGIZJhXAgB+LqpX3VO+5p/WQiciLrZ0UX
s55vOj+yc6/6fGoPmkphIVR2LMn1d+P5AsF1wrKpxAr9GcN2F870dpUwP2iGHiQMxxqO24Wh
e0LS0Nx3KjnjTumzVcL2+czNaH7wbN1Mz+/XCcvOkrEw7HQzx5700d+bC1LvlbsNjrHbCIPd
Kujk2LUx/sopf73BsTEFeWHfRYfXLsh6ShAAAAAASUVORK5CYII=</item>
		<item item-id="6">iVBORw0KGgoAAAANSUhEUgAAAC4AAAAVCAYAAAA5BNxZAAAAAXNSR0IArs4c6QAAAARnQU1B
AACxjwv8YQUAAAAJcEhZcwAAEnQAABJ0Ad5mH3gAAAEpSURBVFhH7ZbBEYQgDEVpxCq8UYFF
eOZoDVsC1dAMxWSBgIDEnXWXiaPjgRODPH5+fhQAL7jiEleE9swPOHfl7qO4UQKEIJaaT2ri
GVTBowyGCam41YODH8GsiRMPywksawotoGXmQC4BHp4ED6pvFTbjeojNz2YCbcu49g9BNgIc
1U0lyZBR9Y+WiR+uqtV3TiRRW/CgbGmTdHF+LZvijS2RgbRKeBHp5W8Ur9XdbfTUbEcb3k4g
I9tGcXyR1EubIP6Qu5DcY2pYo4bV8zV4gMubpSVQPcpCfT28Z0OfKGXfVeAhbiib/Jgo3azi
7q8q7QQuwNHDWyuky9uU4VEaomj1UHQB4kuTgp2cmIeGTt843OWic5xJyT8b+j4/WecNl2OV
fhTnrtQbbdhYmoJil7oAAAAASUVORK5CYII=</item>
		<item item-id="7">iVBORw0KGgoAAAANSUhEUgAAAEcAAAAbCAYAAAAu/JKTAAAAAXNSR0IArs4c6QAAAARnQU1B
AACxjwv8YQUAAAAJcEhZcwAAEnQAABJ0Ad5mH3gAAAH3SURBVFhH7ZjBsYQgDIZpZKvwZgUW
sWePW8MrwWpoxmJ4CQQBDYIo6+4Oh51xRlbClz9/okKpP9V+PAPRwMTF0eDsVE6D0+CU+eqO
cp5qFEIJ+PXT6wtN+6WmHuLvBzUnm447K553lAZmBA4ufqhphkWyy9ygLDt1GoJ32CQchNgp
SQDn6aEFgYBYOHL8VrWECdIHTcGRgxHBoi5S3Phk4KBShCNZJ7NMMBX2zILDlByKQ4RwiBj5
zHsB1SnJMjiGA1tWllp9xfBA9P5LgphryGhubEVw5kH1VIorzzFGZt06N4jNOl2auZ2ijmow
phI4cqRGtOlWSO2i2sfA7h4BjsLB9b4wAuUcfVhcWVi3LgNHFHhbWYHag2SCUDw4xoiuyTaU
Z6qFJgez8+WmQefEYW0g8DqwhiWruqRi2Q47GQdwyTgGg5tlG6d99pXjQzjxiuBc4eRsh75N
E/BbuV7EHUhD8xS1gUiB2P/S+tOm/gZlpcpdaCBRI+ZKze9obpoMJ8wrVXC+vFIQYvdBTThL
RA7DTcu+crj7h0rqvoPnANv9nsN1L9/kNgPjD5XUzls5ZXSlDGO6zrQDOHqy7KBLgQrheqLX
/pwMfeqa5JfAYO5Yt0VSipuGyZxz2ucHGG4qKUk4qQf88v0Gp31DLuuKTTlNOWXK+QfjrtQm
6/RUhQAAAABJRU5ErkJggg==</item>
		<item item-id="8">iVBORw0KGgoAAAANSUhEUgAAADQAAAAVCAYAAAAJiM14AAAAAXNSR0IArs4c6QAAAARnQU1B
AACxjwv8YQUAAAAJcEhZcwAAEnQAABJ0Ad5mH3gAAAEmSURBVFhH7VbBDYQgEKQRq7gfFViE
b57WYAlUQzMUs4cLKOpyYpTshfgwMQRlZmd2FgEwQUuPaInMzOUl9O+Ktq+Q1R0IIdZH9mDZ
gmMELR2WDIYUqzI+3GiFzMcR6kBbzgQcQMXCUoQQ4wcMFtvvnUmRhJA5qzJrIWksXrmoCvb1
TNBhJgj5zVKPF+ZTsMZSseeUJQnZHuTeQWHtSIjazNZDE5CENnaLxQsW3cfwE3YzKgmVNGDi
uxqK1b9JKFjnwoG151IxIXSWK+QW0JoWtYGW/v9eD5He9AmySZSTnqpuOTimXCSeKJSxG0oZ
8/659CpVCIuTm0PL+n4OoTI/Gvm0p2rEdjJYEdtx0JffFBhjulS53L72L6d3K8T9/asQtwJn
538BoKsCJeU1APcAAAAASUVORK5CYII=</item>
		<item item-id="9">iVBORw0KGgoAAAANSUhEUgAAAFcAAAAVCAYAAAAzWHILAAAAAXNSR0IArs4c6QAAAARnQU1B
AACxjwv8YQUAAAAJcEhZcwAAEnQAABJ0Ad5mH3gAAAF1SURBVFhH7ZcNDsMgCIU9lwfyPJ7G
y/QwTNG2an/QFLolY8nSZCMoH69PNKAfMQJGLLMmBoUrKAKFq3AFCQim/gnlLt6CMQa/LvBU
W+fE3NbDwpP6IssC3rbrHODmTTlgqpEuJ7hqvQCOETBgbgtelmqsMe+7b+KXlZu73ag1AWFS
GQqFKRetEoB+vUm4Rfpcyl482F5ZZ7+NVHaIyXu18rLdVr6Bu0uby/dIJo0lrNFM1sDWJLKK
EbgpJnV73G+DKz6z+k3/pLokCPdtS0B6nQ21tpC6TQEZbyQdeQYXFfd0aij2NVHLY6FQcBP5
Nz0qtlrIc5mshZZHE3Gj3NTtubHlebeP0wLL63xqN2licmxz9Bl34kCLfhv8C3NhtbVm9OJQ
3IUl4Fsyfp5MihbDUWzV6Ld7LnY7/nnrU8yjWKmAvqH1t5/jbahUt9301htf85zw4Dm41SUC
D/XsAJNz7tyS/x6tcAUVoHAVriABwdSqXEG4HxkhH1WQHqLGAAAAAElFTkSuQmCC</item>
		<item item-id="10">iVBORw0KGgoAAAANSUhEUgAAAC4AAAAYCAYAAACFms+HAAAAAXNSR0IArs4c6QAAAARnQU1B
AACxjwv8YQUAAAAJcEhZcwAAEnQAABJ0Ad5mH3gAAAEnSURBVFhH7ZbNEYQgDIXTiFV4owKL
8MzRGrYEqqEZiskShMFdFflbxR0PHJxB/Hh5eREQX3jHBXeEJuYH/OzK/YviI3IABL2YmBpq
2gkF01xsQGXDZENx2tShUK2kjRczDK4GZIubne3dve8p0YUVpw35NrElhR5l5flwCC45IJdk
Ewfhnq+1zgE4+YnU8j7/roA5IFJREoEafXfxMToAwuCyR9CHSe6as51GDYIbm/DeWkVb46NR
vXXyeyDfbgFwsgk1pi/fulHTKnCOVVYxOF9EqBGFG0YXRqURYWsArdQlSNNYPtqOo/IXcbgY
QIZn7r+kfxUflflerTXQEsBtVMqhid+BeHCKSipVQvbWUnfrnHjwyiO89FIPeKmCqe8/iqcq
Vrr/DW2dVzuA69L5AAAAAElFTkSuQmCC</item>
		<item item-id="11">iVBORw0KGgoAAAANSUhEUgAAADYAAAAbCAYAAAA3d3w1AAAAAXNSR0IArs4c6QAAAARnQU1B
AACxjwv8YQUAAAAJcEhZcwAAEnQAABJ0Ad5mH3gAAAF+SURBVFhH7ZfNEYMgEIVpJFV4owKL
8MzRGlIC1dAMxWxYhGT5MU4AlSQeHGd0gvv2e/sgDOAOv3ixXxSFmi5h30b2X4hNIBgDhhcf
QQfBMoPk7h2+F1NHoeNqIzXnianBiLuB1GliKpF/fp5V8zCywrQcgCOdhIpZJCHZx3ah5S1w
WUaYwSqNzSy1ARS1ox5ByLnCgt7O0boN9tJtYc/iF8ScCEGSOXueZ8OXWzaF0eKVoCFiui3i
QKmzoV3fh1Xu/kFAbQiLijf0uA+RxIavlKRUz6K3IWwy80VnyBVvOrdmw15S8r0wNaYz5KKf
Z22Ic1geBAdZcW2G0hB52g1FfzAHe9o0zAN/CLZU/CCnBNZtyECod6eVOFz2iHvyfathOUBU
nBX9gq4RNmhQaF1StqJaLiyx4SL064WhpwMRdGtocJKoJVdILE1DO7ydBEn5P+jIhnYPqYj9
Wjq53xcSu0OwB3VEyossFrZHl1uueQlr2c0j1rqIHdHllt94ABV79U5yUpgdAAAAAElFTkSu
QmCC</item>
		<item item-id="12">iVBORw0KGgoAAAANSUhEUgAAADwAAAAbCAYAAAAgVez8AAAAAXNSR0IArs4c6QAAAARnQU1B
AACxjwv8YQUAAAAJcEhZcwAAEnQAABJ0Ad5mH3gAAAHASURBVFhH7VfLlYMwDKSRVMHNFVAE
Zx9TQ0pwNW6GYrTyLyvbYuMomJAlBx7vgTEazWgkDwA3ONM1nAmsw/oF/N8ZPzvDM+hhgMFd
aoIlM7QrGBXfufd6PoDZxZiqWIMRL+YSsOClbXjGM2xHXHQBs9QObjX/fP9S+IscjNtjGMF6
0sJaB5oFvJgRlGOzYhE/XMnm/oAJiytqTKz62FwCcB0DGGViUK5ZhiLTywTaXAVSTuWQMr5d
7/eyLQFjnKpUaHxWA76DCjJQBKBjnpP5u9i912kJmCMryroCTEFZTc0LWdKlkcmY8vsmc+Tu
Txgiy3A74AIUlYZYzrKktKqmGbDHgonON56xfmmNxtrDjB9RzquSbq5hO9U1GluU2kjOLsju
koZAFHXppATC8FqN1ubVKrc91uU+Q8ontqEwPJV92LOYjKRuHbycSeMv3LwG2qMt5f/nBqX2
SavhjOw3S26KCcuafMP3e7DP/UN+ePDGsP0g0TsRcsBkXMsPGX3b0KsJEQG25ncAcaZBp7FX
A+r9vQBwbvneJZ+YjHoDerS/AHDpjp9VxwLAx67RDgx/AQvOx+9L2lfSj2rg09//AN2tAHnS
eRqyAAAAAElFTkSuQmCC</item>
		<item item-id="13">iVBORw0KGgoAAAANSUhEUgAAAC8AAAAVCAYAAADWxrdnAAAAAXNSR0IArs4c6QAAAARnQU1B
AACxjwv8YQUAAAAJcEhZcwAAEnQAABJ0Ad5mH3gAAAEESURBVFhH7VbBDYQgENxGrMIfFViE
b57WcCVQDc1QzJ4sYFbkjjMqHMYHiSEkOzs7MysgvrDVA60Ct7gf8LWmdy/mjeoQAJYj1ESG
Xt2LAU1xo0+oxIyL1U4zr3sCLzVLIjOggB51cdAWw4gyEJoDTyyzR1quO66l8RhXgnk3HicX
1/FqAlnm/XgvmFIePMmjQ6WsdGrJJL048+C93sE2YI5vX5IcC4DNtxx/3vBZ8FRMDs7ZbTHP
Nb6NplpGDXW/M0+S4Tr3EXUg1wvJxjMda5AM/B9RGUe2i8rFpN5cgen4fm4ibNzPEroiKtmS
IvO7MLnXv01tU+6p/zC/h60z3zbN/Bv15K3+NJcSRgAAAABJRU5ErkJggg==</item>
		<item item-id="14">iVBORw0KGgoAAAANSUhEUgAAAEoAAAAbCAYAAADbAhkjAAAAAXNSR0IArs4c6QAAAARnQU1B
AACxjwv8YQUAAAAJcEhZcwAAEnQAABJ0Ad5mH3gAAAI6SURBVGhD7ZjNfcMgDMVZJFPk5gk8
hM8+ZoaMwDRexsNQJD4FIkDjtq7Dwb+2Dlbgn/eelAqlnmpcdQZiQKpDAkYDVKOjBqgBqs1S
rdHzEYra5U0JIfBatzrAbTVr8VoXbHbXB7Xd9YHvakOLLWqtwEJI06x2a0n8W8O6OKiHklOi
IgAXgaDWM+sn+Qgjk11/MlBmo0EBdZu8zJh9VpO4KblHdbh7PtDt+0cgwbYALoDCAsHHwadO
tm9uurG7tIZr0zpiO7f/iv0cB8wmvdZCSxQFRTRBL1dGir94YBKqLlzjnzZoi9C+AwrOh89R
ZVNQ6EetIC/VHFS6+UnOGJBYOPO+sxLtIE1qOOID4UBZxZS7H+wZXGSU52KAgAIIpEDBz6bd
Jt7HTSX3fOfg7/84sO6MeipgEIe564IRKCBI88i1xvRA3P1d3tGybu4IzwSf94J523oq73r4
IRe7HpdfhgsN83R+SMCZg3LF9IakDr+C1Ne43R5hqZ4aZByozVF518MzaS4eVDy9xhNppoKC
nA0Ms5FYuqA00p5fHvLg8cC+V3kyZ8BYFfrJnHY9eKAtRzjpxjDoZKvrrmHK7bXemdYbRYFK
ir6N5yduXEhgxIrTv/+p7XosWlkrSGDWYLFdcNH5FI38Trp6xumz3bkH2q6vMGzH2OY8g+yo
MF3Edp3/PciDWoF6WBjc2nMrppaHTYpiO6If8/kvsVeyXaei/rciaoqpvd6kqFqRT3h9gGoc
IQaoAerYTP0CqC229/o4UJUAAAAASUVORK5CYII=</item>
		<item item-id="15">iVBORw0KGgoAAAANSUhEUgAAAEwAAAAbCAYAAADWHGlkAAAAAXNSR0IArs4c6QAAAARnQU1B
AACxjwv8YQUAAAAJcEhZcwAAEnQAABJ0Ad5mH3gAAAInSURBVGhD7ZjNkcMgDIVpJFXk5gpS
RM4+poYtwdXQjIth+RFGwoClNZtxJhwys7MBBn289wRRxvyY8eEzUAMWH5ZjNYAJHTaADWAy
i0kj6asUti43o5Tyn1m3weKxcY5Sdr6U8MeO13cL6m60t+DTzE1o4fsECv6eHt8C7GWWKVOV
A2gBrKUM008Ai1Rox0/L66rAQoFJESdzaX2YydppWdE6pf81GoCew/xkSb9A8reeoySjjE9u
WtiNulqf2DHWcWRLXK8dC2rMMswtcjPTJt9w0k6KXQsQwkuHV8gVd8jzs72/s8DAjvuLq/e1
VdQm3TYwWghI3q4RO1Cx0KPihDBZB1kCBo466pZu/WjHHTBXIFmg5nO/gfxkY+7QrAjQwNYw
j7NJFggu3FMZluyYAXN2pHnli80V0SyaLh5OB68RckNq8dOWNPsu6e9ZtS6JDwLZkQJzp4AW
IMqIC8TGULWVBUK+y4IV5kuBdVEbuUbwAx/bkQDb3WwLUMKYrD23bEGyAyzLOVVQRLdrBeyx
ftOv7W3vGOiSbsIRCEnBoSVzDqGLerhZ1mFcAJbZsVwEPBfYXQ512GJb/8x7nSKB2rSLEBjp
TPzMuLriRI/vYiPYZG4VNae3Wd6Fih23g0XeDVgEzFvXP5/y51J4IaS3WuH64G15lJPXt6kM
mFdEvKDiZ0oCWA969JMJOwevB/APwK5XxDttOYAJc3QAG8D+NzKGwoQK+wXboWZ7Tv7g5QAA
AABJRU5ErkJggg==</item>
		<item item-id="16">iVBORw0KGgoAAAANSUhEUgAAAGIAAAAbCAYAAACHiFoHAAAAAXNSR0IArs4c6QAAAARnQU1B
AACxjwv8YQUAAAAJcEhZcwAAEnQAABJ0Ad5mH3gAAAKpSURBVGhD7VjBkcMgDHQjqSI/KkgR
efNMDVcC1bgZF8NJMmCBcCaW7YTL8chkJhjb2V2tVgze//j++TwGQyfh8yQgB52IRhyhE9GJ
aMMSWrHmoiLu3g6DH/Bjbn7K1PLwzoQ1XLf3L27y4b8KDGbxTO4yYwQfO0pBadbr1jRe4SEX
7yb5kNHWf29FWfvf45kYAQ/C5upHEul8bUaGcr1KxOSu3qD6herhwSsq2Q9AW1ZFql5xBQF8
um6uJM16hQi4mQPbyZgNIE03b92jIUuKdhkVehyZVSLg/5vSKfhvO9YlEQnsuewMAx4rpWZX
31YNqQ+UFVETJ7enHeuCCA72aHnTBvXZsoEfp8AjyKT3jWGj9r0hYFQrYgfQZFdP9hdEFGAX
ZdeWLZ0rgpeJIIxCX1ix81fWRXx1WQ8IHgxK+k+2tGpNO3oAWfqT/TkR4032gBBlTeO2hOCd
bk1epqK8cvTrjIi1HiCb9hF+3vo98v7IbBCFmZr4yhyhWJ+JINXHRiejoLCl4ItpsAn7l4aU
zyCoGkpfaV/M2su0vqQzNlAVqU2Sd0Z8zZ9fG2w1kzN/99p+/aEfgorMIwn2ClEXJm6ItzgE
JuDDEUk+jeMfRbLxe57S+fX0kjHdwL1rRwitV5Pm/dREEHhAgKlN33zooSpgVUbE3cHP42+o
anZsUl7fyOmoBtwte9REvOahoYEysnCfAeCT0mNlccAzHz43pm4B68xrlUREe6kdCrJpHADN
QA9TaD6th/6BqcctAyMR1tRxyrmC0BER7EUqZPF9aswQeZ0J/QCrQqg/XA+x2cL5Fj8wo4rb
MAmfqdZ33FtFBIJUb6LFEXKRrsomnlIUxb0yrRx/kPcOQLXPUBGhfVjft25vnYhGUlknohNx
bgr5azbYK6KRivgFEv/vIq9Krq8AAAAASUVORK5CYII=</item>
		<item item-id="17">iVBORw0KGgoAAAANSUhEUgAAAIwAAAAVCAYAAACUqQa1AAAAAXNSR0IArs4c6QAAAARnQU1B
AACxjwv8YQUAAAAJcEhZcwAAEnQAABJ0Ad5mH3gAAANLSURBVGhD7VnJccMwDFQjriI/V+Ai
/NYzNaQEVaNmVAzDCxQuUhQt55jBw6PEAkEQWCwAenLuy9nHfNCLgalX0OQMVAEDBhhj2FMV
xgBjgDHAWPl8X/kUDLPOk5sm5TM/TyHRgsaCtn54v364dXu4+3Rzy0bfb8uN+H1e/Xu/Jj7d
p1vuNCb35ZPFQ8qUON4fbkNMyvfi8Y66K/aqJSkp9IcrmzzdHEDENv5NUEgb35dVl5yTBAD7
FgKNv/tykLgJMOnTc+Yog+MU96WxCzJFLwewl5eA2W1TARON5YySN8YHOHSkN2YWmTAY2Ct1
/UbfEgITA+mTDwU0gUAyTvQtBA8D5iBpBWD82gS+Pejb8tjJQDCeB/Diq0nFXgUwiU0kMDLL
9JamCvUegkwL5pW6usGiZ/6Q/XFP77/oO3jm70L2d/pUAwO3R8ocnKPqW81ebawG6hSOzRuT
w9G6CXWV90E7+HT5dGj6DtZIXRm4AtQV3dEhqf7zfkD2AYPs1w1Cra/RklO3YwQw0K9Uz3oy
GfWmV6U9zjDpfzCEHyYEmhrZkM9BxbrwWqkrgAPVfLY+0imh+bB3kA/PRP/B3jOAqQ4DMCB0
sgRmBAimYHME8th/ZN3dgMFDy1Hf+RpgUpaqjiRBkWxDg7oHhrAHcuouT4EkKZ/r8tkXbCm6
NJtZWQ2s6eXXGUAW1lT6hlG2GFmX+0IduNLH3YDJIOlpkmVytVmWMkwDbaRxigcFh8veRu/U
K/LVEogmA2UsLE7W1rNzRHB6gJDJ4CjzRgBwdg0wiWrL64ApZb7Ffq8wTBXBbEKiczwdB8FI
nDUt+fiueiCNPSg7VKeCEgTJYGfLUWC9d5QkrFcOGScAsz7KvY7wRwZldbodB4xeGrT7gHKp
AxmFN41/BxChPoOzAJLntEkOrOmKfYjXD05iupO9qNyU8RCoNpc4v/6ykf8ssxD5gyYeJZNe
YqA/q9/VVHulYMcIYJo3fy26hOZKuygiTSe7hSQ6G5MTXDphXfAd64dat5qkR2iWAVy/rx6r
272BGoPip8YtbmmKpYw+ne7JxPfsGQLsx8eX2OGHx/A/YKsB5g8EYfwy8OcBa4AxwJz6UdkA
Y4AxwPwniv9vtn4D42rBZev9BvUAAAAASUVORK5CYII=</item>
		<item item-id="18">iVBORw0KGgoAAAANSUhEUgAAAF8AAAAbCAYAAAAahVOPAAAAAXNSR0IArs4c6QAAAARnQU1B
AACxjwv8YQUAAAAJcEhZcwAAEnQAABJ0Ad5mH3gAAALESURBVGhD7ZjRncIgDMa7yE3hmxM4
hM88OoMjME2X6TBcIAQSoC201eodD/7UO4Hwz8eX0MGYp+mvcxgMHfw54C33Dv/Ek9/hd/jn
Hf0zbbeg/IfR18EMA77UaMHcjdaPzyzM4wXivJhxupnr8GP0dDfKx+72oO5J3Mn/rzczraof
xyCLDa8sRpwjgz8qGbD7vmfhLcG2jBEbgySEsVFEJWiT/mmAeST8GGMC3y5i1cOzazfBN7Uh
8y0wW39rFe/UC7ELFUPc6gJ/s+JJ9/Q0bfB37nkmxgS+V0tyVEddczRrAyRFHpVQgO7ipXeK
w8L3SXE2JNd7K/wQm4wx93x3jEteWQv3U35H8CEeVw/knnL4stYN4hRJ27FjqSbKpMo5rit1
stxqUrBVxWgfbKopcTOx2O8TAYMPVkbACIiEj9AiLA+R7Iw3H8FCcN8TuALWGTuG2ZtnuFSk
5/v8NyZgUwexWhskfLsGbx4EfCrafE4Or/A566LIMXinBZ+X1B/hw+A0S6iWvFi9Bta+E5TH
lMNHdaL/a9bt4D7TGoRW4+ClKiZhciuz8BudIsAvFqCSIqw6YHF1UN//LtsJyWHggti8aqX4
mM/PWQgfN8dq4YQG+Aih0Cenl5RwmTlaqUfPl7aebP4Mdt6BudNASk5sR7PLluWG1sLrhF8L
1qmwHdauLdwOU5Uq6KOxUDJrIu+bPYJHt5p50mQ3Ur6Z1nc7/EYM+xx950SchDjXbtcy1vmC
O3NcYqbjRG6zEAS9f0dNOPqktc/XCL90A4599Fpf25OyQ/nCB8XJQCvZ/OBptW1sV9U3JLpB
+elFhNsOtKkKrecbNv0pMdbDdxXfdkPJgzaq6OzmN2noo8XDub+p3L1JrIcfbnDY2YSOIqg9
Ptfo3l8ntnr4/9SX96p7aXyHf6KoOvwOv84jX2kBZ8zdlX+i8n8Boq307VzDb7kAAAAASUVO
RK5CYII=</item>
		<item item-id="19">iVBORw0KGgoAAAANSUhEUgAAAFsAAAAVCAYAAAApZJKFAAAAAXNSR0IArs4c6QAAAARnQU1B
AACxjwv8YQUAAAAJcEhZcwAAEnQAABJ0Ad5mH3gAAAKCSURBVFhH7VfB2YMgDHWRTtGbE3SI
nj12hn8EpnEZhuFPAhGIQcGqvXDoZz8VSN57eYmDc3+u/+7BYOhA3wM04tzBvrGyO9gd7PtK
+04bXSl7ngY3DPh7urnE+vwM7wxuNJ/2Bsvrx5ezW8qyLzdSLAfPOapaig/yp/MfzlhBfpI/
YUV5fJyZQj6F9bqN0MvKIRj8AsAGGRVJWvOoJOrtplIsFeccUm4GVp6nF6PARmJSWK+CrW5I
iSF7ANLXSoN9xgKZEkAMfK8CzgYdwaMzgejkbBQIKnmaNZtDUQRiCusVsN/OmBcsXG9qzROe
eQvRD6z12jyJLfUh8ftWheTtWF8TIRDf9AZx8RXzQjDZMvQ8LeDmrVdbr41+oKRp9htngAJb
E/izZ1daCCdb9telF6BSUK2UDAddWt9QAU1g1ooieS9YxT7x5b2VBolA+uTjxmz+AZQUKBnE
qqkERfCa8H4k0j/ns4hMLt2lHNvAiU2em724ZkRX7h2a4olgx7KhgENQZB/YkVdASVJiuXkw
FXLoHlfG+nlqGwT8EWCuUPnpYJOFeKYXsIN94L2VhXDXTZNLla09Ty0km3pEBQSivusNlaqt
IkfG1753ZiPzFL3YlzOAz7NjSkAILiv5cI9ICjaQVgf5s6gM7u76XB+6u4U+UQVGTP4SG+H8
N8ZQzGdLHAnYYkKQs7bWIIRy5ciYgU3+C+ShhcB/gxUklS+rAizEztDh5UdFI/iHZm31jNjI
Jag1UxOBrSossY+VUhIfzZ7JeTj5AvRql+NTPoWk8zTHVNeQzh79ti0ix8s33xq7078gf6ac
dh88T7XXn93BvlFYHewO9vUl/Qv76cq+Udn/gucniaZgRqwAAAAASUVORK5CYII=</item>
		<item item-id="20">iVBORw0KGgoAAAANSUhEUgAAAKoAAAAbCAYAAADs4BRSAAAAAXNSR0IArs4c6QAAAARnQU1B
AACxjwv8YQUAAAAJcEhZcwAAEnQAABJ0Ad5mH3gAAASNSURBVHhe7VvJdeMwDHUjqcI3VeAi
ctYxNaQEVaNmXAyHAAkSm2RH1vNICQ5+GdsyAQEfH5vmktJ3ilfY4OgYuBxdwdAvgggwEECN
jHKKjBpADaAGUCNtR9reCwOGUefxki6X/hqmWxrp/XBLd8FAX2ka2PXj5ymicy/jxTkqEOdr
xs41zfdbGi4fabp/duwAhgw+1PeAL3NGkeGm/vv0kQWCIKYIHqA+q6CdR//zcOQfY1QBsgzY
Rmqd0MbZ2gTw1j5fOMMFKrKqQv99uqYB2NOLCsO0f8xBUeeWTApMiljITCkwkYE6XvNnkH0t
qQmgLpzhALXQsUR+FjTltE5o547JB4/TV6T8U4KVmI6z3yskk7GDREZ/6SwAagUwlpFSngBq
+608wwK11RdM4QbGAuKBAROYVpQIp3TYK86J3z4u8QiolXVVvSqB6tvTABXrU5XKORixLGjf
MwUCoKfPKrqR5k01/ntzsyxxUnqgTngbgFpSAWfMlBQYOeNG2j89OB+z4R4ZwxIaBQWUmD8H
qpf2c80wiRq01jU5uiLt7+HEv3CGl3l7fTzxrn8hM4vU76X9NN9sDVpHVQMWyAczdLD8ZpZ/
V+pvLI7EWObw3tiKsz0Dqm2UTNpvoPSuPQBg3YxwAL2OFsxv10ePq/R8/kmgUnHbimcompE1
aetkxxfLaV9uq8yYi22yRC1M8ljBDnrhNSbyugw6Q7NBlyv1kefV+6qyx7lvSvD3TW69Tr93
Btq8SSBG6PbNM8Q8JenNqNzMNHs8ZQutOxsFLdnYAHTv8ZQ/zOdN2cOB/zOp/+XCujqSDN6A
RsNgPtri7AeOwZq3AtPdeIFTwTnwtwyN7fW6EZTML0obGiyj7DyMboPoen4uedrwmtaCNMwW
c8AVGdCIiiWJcy0FZtYDnfiMLVZ1l920nuC87OO3s/HKCnXbzayVA940QS8WOgDbloMDojpw
zqAqqzk4k2851O8NSL4TsK4IonzWoEcuIGfIoKH6m4BMIzn8nmpzDUQpw274yvWNVTBYvWH7
ui0wQI3u67ps8+lxyiZ3hbrpprytFUXfwkarPLhQjSEAUBzO53YIsgxM4WQ27zWNoHg2oaZY
Bko5D+4OKSVE16u872CC93IvTdcqGYv3rICp7htt/4QtDFM+uN9NPv1P7OnpuhtQESgLA2Fv
mqCBwtkOHCVAieleb8R4mWAZW9bdmrWojNCMoRivyu11lfzdmowlNiUbzfmpNJqYiHvP4Hhs
C69nKEP08tprJfoLGbU4rRtIgFOxi2Yt3A0Ti0E6zGl3yukX61EAf3tQgQzX60h8zqClUAAa
bzKYw5ya2ESulqPZrtWPdW2sWZPJkEDlTdpnmmcZEPbaytKeLaoORvcVXc7Opjv/VxSnu2ap
Q3Tl5mkr1v3Cd6q71k1T68Z53YhMwmtW9awskynSN9PRa854l0r30KcVyzLs1ITukRpC/twv
Z8B1WyzpXmp2duYve6Jtt9T/G6I27uE4qV77IoB6oIYhAmU5UAKoAdTNK9d3BlYANYAaQH1n
xIWs49aXe/jmH6bCvW0f+JdPAAAAAElFTkSuQmCC</item>
		<item item-id="21">iVBORw0KGgoAAAANSUhEUgAAAE8AAAAVCAYAAAAHIbMXAAAAAXNSR0IArs4c6QAAAARnQU1B
AACxjwv8YQUAAAAJcEhZcwAAEnQAABJ0Ad5mH3gAAAIGSURBVFhH7ZjNkcMgDIVpJFX45gpS
RM4cU8OWQDU042K0IJAtCdnr2PmbWQ6enSEWgU9PT8o6gB/ozzEGroM7Bi5z6/BOVF6H1+Ed
L70ztmUo7w5hdOBceXzMB7tBCHf86+u6G68wiazJOOdvEP2yD+2X188c+HWx9fzNvUpipnBR
TAzPwwuzCxKAArE+cUgbXSBMbcajl+slfoCYYzGOEvIZtdjwt0RB5653qALKPJTy8iYaSs4I
BVIWBhizOhsVpXiVOZmMcsgRVfxN8Ji6ViqqEU96T8Gr0lVQYuAlmt4JqfRQRRIqTFfwAkyB
NX9x+nzchEelr/Z9E2gsTQ0Pz6wEVddaz6ultepNM6BWRVMYZCkLwNue8g1KNOFZIiHvNw9d
FdI2hWycCyAsyTlTCY6XTYSbLDaMB5uF2XCoYR3Y768EPQdeLhMToALEJd2UbFEa+puZvdd7
3qPwd8MjNryDClOc2zOvdxpZ6OKLRzYlK7xCed+bPOwvpenPD3teDtTwGsXEazue1LFltEqW
ma8egfZc7FHl7Nlz6x0THhSBcDb03twwxDyGytCdt/W0chBr/DDWNmbDs5d+Vrz0cDXXzkJY
qqjCSwto5mxY5IZMHRjNuh0jeMmuNwm292rj+NSoou5t/ADY9QvjWVn8D/v0/6qcaF4dXof3
+pnRsqGuvBPK+wWa+PbDaaPa0gAAAABJRU5ErkJggg==</item>
		<item item-id="22">iVBORw0KGgoAAAANSUhEUgAAAEQAAAAbCAYAAADFyymQAAAAAXNSR0IArs4c6QAAAARnQU1B
AACxjwv8YQUAAAAJcEhZcwAAEnQAABJ0Ad5mH3gAAAIKSURBVFhH7ZjBkYMwDEVphCpyowKK
4OxjatgSqIZmKMYryTbIsskID97gWQ5MJsQJ6On/b5HO2h/7HDuD7oERC+IBIhzyAHmAfM5M
oZDJmq6zHR7DaNeI3tvOg/8MPzdTA2Hs7zmpxUFZ597VCodZ3Lm8ZZYXLOrtvKY0F5M/f79w
/tRcqItqfNmFmu7WIpQskHV+2QHVkKgAvnhA+35AmAoO1B5UQfeOgGBdBgjIbAY7RAS9UtbR
mvldwSrBjqFj181GZAsJBOoYpAP8uRTIVrST0cAAoHJyNrqrOrackEByzfa2SYDwohfDwxW6
aGTQXtdJDpWuG8I993oi0LMK0QMRRXNpVbNLHagBsBoI1QqNiOU+QX7wjPDeho60aJdDy6gz
ZBnTjPBb8FBqlwJlVbeMdY3mu0xQElPIUUak4aoO0Vwn/vjpOs5BZk+/zbrhU84hpIIQZOnW
l9gl+M0PM3tH9+/KLkd7fgKlxrbLBjOqLR0o9ZOqqot4wZ4GOFesK4pv0wiFv1crS3X9OmFc
/rRLkgNFbOO9BOKAtTa3FAPB7kc2EHmR3e6+2HmtOguBYPfjrKHM2Aam1D7aG/r2ujIgqAY2
DrsAZYBILfgewVz/fFITWhEQns60O8lRetu1/kWGYNfbK1SrqvMKEXbRXqiVdaeARMNWY38U
aRtyCoj2R1te9wARs9EvBYCwPFj2R44AAAAASUVORK5CYII=</item>
		<item item-id="23">iVBORw0KGgoAAAANSUhEUgAAAFAAAAAbCAYAAADrjggCAAAAAXNSR0IArs4c6QAAAARnQU1B
AACxjwv8YQUAAAAJcEhZcwAAEnQAABJ0Ad5mH3gAAAJ4SURBVGhD7Zi9bsIwFIXzIqx9ATpl
6FixsHVE6lDJYqiQOlTqwNAHYMjMC/AG2ZhZWVEmRjbe4DbXvo5/SOIkpvzFAyoWsZN8Pufc
60YAvxA+3RlEAV53eMguAPR0YAAYAPpZ0DfCeq7AGSRxBFE8gsypxAmwKL+WPiwVG9djgBoQ
J0C8dggpQc6SQQ5SjHsMUCiIw3ABzGaWQhHoAJLsbgCS1TQV+GaXnN8IoG3vbAQxm5RbeLV6
K3y+2XwUTfbh8A2LxevDNd2tASI8TbGGhRHQePwECBG/Y2Dudp8cGo7l93Ptftd1UqbCXIa6
8ZfU0WT9NgBF9sl7WxmIcNbrd0Nh+/0XLJdjeFT1Nc5Ay8ISZJzM3EUEoaL6EGKTHa26Rq9c
Puuce24bBap7i0xuBFDa+dwP7rPetSysPzM+A/aCzjYGAaKVfV74lufyzXC1MWVVmOY4AWIG
mgBUA8q7caxKPFip0bTHUHW92EEA2aIIS5TD/o82xjxZRNTXiftbJ5R0qBUPE3gtwOPxB+bz
l5KXokYylSWdOvWixJudu3gg1ckDh4pj1ZBiFlUDvO55t85BtQCxgKCFTxbAHcmBMEZnSByz
fCytwH/Xzpda48nX4tdPIM3niOMRAhad/S3bvezZagFOp8+l+SdCXL2wGCuFyYDVu31dXfh7
nAOTB3IeA21zyHn4v8xm1ALcbqclihD5ULw8ZZw51u1qq0tkjw70Xu3b7b8xtlpsu5I9s2RI
lqS8y/OSW/REbSpPWWURuYyausSHswrbi9pqse0qe7RCYbKC0fHqRG2yaj+ihbvsSN/mtFZg
3wC53jcA9KzmAWAAeN0K/Qf9GiCRt28fkAAAAABJRU5ErkJggg==</item>
		<item item-id="24">iVBORw0KGgoAAAANSUhEUgAAAFQAAAAbCAYAAADiZah4AAAAAXNSR0IArs4c6QAAAARnQU1B
AACxjwv8YQUAAAAJcEhZcwAAEnQAABJ0Ad5mH3gAAAKPSURBVGhD7Zk7bsJAEIZ9EdpcgFQU
KSMaupRIKSKtKCKkFJFSUHAACtdcgBu4o6ZNi1xR0nGDycx638YvNBhQtkBhCV7vfPvPP7Mm
AVhCfPExSCJMPpjEMgJlztAINALlTVFuy4sKNQqdgkgSSNRLZG02bg7pCK8ZjSFX80SgEgSB
GUKmoOTpQIKth+psQAQaqC8bQ5q7nynliWljSynhPz5QFXBiVcXthZnAVOYAutm8GR/Z7T7M
Dh2P37BavTbuGHdgt5mv2LA2PlqrUAI2mTwBQaX35CP7/aeESGP9/jZBVhcJqSanoJTet1Ca
F1M+hpGTxnXxVgIlWNvtu6fAw+EL1usJ/C91LiETg8BTqzezs4cSZFInQb03ZV5jPQSoTarr
e3cGqtP/GovnmpMt5bMhjNK5FQ6mftrQj14ElFKfK/i7nQdhln24uYuQm9mlbSIP9SHYhlam
Bhm4LAjq5uHYOSvrhjlJ0KNSDIAWYgJxfEt/VlkYeNsmu66guJliVj4RAfgnKxkT9rK1J6XT
6QcWi5cz6qTJcAJsiItqSGMEaqqjGhuYYaNcLMZNLxkUBqD/3q2SGx6m1AKlgkQeWgqOFIRH
NSHUGZbGAsdaUfL/9nxbbpLP9HlK2Z6HMT8J6mOTaoHOZs9wzj+LImBTtBhbv6GxqZQyfQMv
kvBCf2rfTPcB5tJ71AL9/Z2dSfcw8CJ9bavhp3uVOsNjXY6eKrD/a3PcuzTYPq7r/rQpPEUE
6Q0y/ckLh9KkfaBuQZtCplsS3a44c+vr+4DAeY/OQKlouD7npTd6nu4JzXe8doTSXENF4Oox
mVWlrt5+weIM+NpzdQZ67QU9+vwRKHMnEYFGoG1+67ndd6JCmRX6B8qwdyZ5/a0tAAAAAElF
TkSuQmCC</item>
		<item item-id="25" content-encoding="gzip">H4sIAAAAAAAA/+z9T8w/T7bfBz2/31z7+t818zkTWyY3iqZaChgpRlcMC9gZOTiOiC3jcQSx
IixDLuEqXNtioiSgCHsR4bDC1myQYMMmkdiwGNgh2CTxIl4xSwJbNkhBGqQYWdHl+zyfT3fX
n1NV51Sd6q7uz/stzfz60111zqlTp15dT3/6eb7fffzBj48f/Jv/m9/4+P7jP/r7v//j4+OP
//Dj47/w+/9zH8uP/zt//s/+me8+PvXdx//63/v87+9+/t+PPz7+pZ/9xse/9PPf+Pi8+j/+
2PWf/vrHx7/73f7533UfH3/r27kf/zf//J/9tPLZ5x//dv77j1D/vR99fPyPfvPj4//27fi/
9F147T/5yQ8+/uS/82sff/zb8R/59r8/8e1/f+jb/37otfmDr8+/+ubrP/jW/596tf2jHx9/
+y99++/f/O7jK9b/7e/93u/5tv/uy9ev/ekP+ssfv/NtfL/98bNvA/wL3/77b3z771/6+Bvf
zv21j7/+IdOf/n//73/r4+/9f3/fn/vJH3ue+Fd+/PFf+3b8T/8Lf+wzbR//3f/njz7+yn/4
67/1dz/+dx+f7baO347/r/+v/8v/8D/9+7/+W//xtzafdv7tb//7zX//13/r4//zn/2tf/O7
P/bxG3/j7/1b/8f/+48+/hd//e/9W//wH/1nf+vv/tl//KvrP/bxHNtT/8IPPvPwz/7xvxtk
8e/8z77c/+0/8Pr8e6+r/pg/FGP+m//xjz7o//T9b33+95//6/+H3/p3vv33X/7XP77Mr7n/
dEHe8Z94HX/T99/K4qvxP/k6v2qdv2/F8vEnv/3vn/gcyz/zz/2Zz3r5vZf+f9/a/Iev+Nd2
//nPsfyFv/gXv/t2/nd+96/9K7/943/5t3/2P/if/M7f/Nd+5298jmP199/34vlvfew19DkR
f+x17dei4//2t//9g//Vb2wxxjW+6l/9wx8ff/VboH/x2/F/9dv//u1v//tzr34//vgHH//w
W79/77tnvGvb7748hPqBd/xZrr/5m7/58YCgDtHi6+xoIOgN9MPvvjs7BOjCCqENdEPQEQK3
oXZx1Aa5oRvqs6xdfJJetR5eWVtSbh3QZsqzSUtiJXW4CdyGWpWjdrHgIGgW+RuN3PFTFH32
+7uvg+ise4R49g2GR87z4DYjscN9rT3bnM3t8maN1Begw8RMnSd3dnhvIMrk/vNadjKwdDz5
SUiP3dqM2Hzt5/wrtPUlz4TXe2/wyHhnHYafv3Gbf1fgqe1dgZ8+3xXoTlSfmEJ13mXuXPkC
dISYactPIjRKbOqflyj8yHRyx8Y6ochLQ+54/0RBymhPo5/mPesZg3s32ueHghlhHQZTdvbe
/FH9GixbYqi9ExVPWu4cNFjM4glWPzsNWDovJWhdLwT52T5Q8uzkmWEvn9siCLDMcXvxYb12
KzgMJnMCbj+SkINio1zxZS9Aw5XHM8B9rChEsA+icIeWdjoguukVs5o79oAen31uit2L3ttp
99nydUguNLjm/tt/6UXv3YfHft7h+mEabm+fokIEtyfUjmaXXiSA+0AlqwDc1kjCbS+LFJ71
t9guavyN2KzB7c66dVv2bk/I8w7Jn8wZuB2MLy2qXPFV3qqBhqlEbVkDyExJmvfFEy2sUqd3
lYDbEX6dd9Z/RhB3pCUA7XZ+CY++NSDvsrf3jhxOz+349RlwezJtVM43oXqTt5PoXYGfDH1X
IFkxBMbLJWS8887vZ7mn6AvbImK8e3CHa1Pe4fyMjx6ygPFzSbbvBuQPUjoV4LZcAm4HuaLg
m8i0tQ/XPLcfSePYWurwAtxO71Qu7lO8AA3Uuu22agf1KV0FxL5NUen0phJye2sfcNulrX24
xvtmDbdTh+A21CE5jgHuQ8SsAnBbrDq3wyTS4r0f6/jW7pEeK7jNO7wCt9MfQhzXD8V3vF4w
dtZtoVaB2z2ScdsFHdaz4aPctHUHt1OH4DbUIRWKAe4DxGT49XoxuF1XndtRqsZzm3d4CW4H
Z87ituhdgR9N8XcFppQS2i/IDwwI4hjPPg6odHpPyRgfdnCPeAOtYTxJGJ86vA7j3esD9ubT
iLR7bYB7uLgZAbelauV2mEAtt13SANyGxklPYTXpIaXA7R5VuR3nsJvbO4h5bmccgttQq1o2
z4QN91ix3H6eALerauH28og3xSpuE9e4yO1kow5uQ3K1IbgF9pBc3Cp4fYkJblcl4rZLO3Rw
m91B8xbykYDbkFRLW8Ibu0EyFbJ7DW6L3hX41R85/12BMxhPjG0wHhqktq05nqoM1uUZf6rO
4Pa2Ob8dt4PtHLg9h5rxS5iogQK3e3QKt5kXD2/Ebf+D4/qFF9gmkJmW7DzIutpGA60y4Ham
+zvoHG6/wH03bhO4PZ3COWno60zDgVaB2z06idtPcN+S2279BG7PoK49Mzbc4wRu9+gsbn99
vhu3F3B7Nnm3UtG7Ar9sf1cAm/NhAuN7pGX8mlLqZfzrvdsq44mPZEbGU7iVkzGe2CaQkTp3
13mCQJ3q5/Y7L50qtx/LIG6Hv6LsXb4st8OtObg9gSg7CUJhwz1K4HaPWrjtHibcDmahyG2X
mpuQ28uSfnZcv+ACqDBSndttbLjHqZ/b77x0zuB28Ms6jrl8SW4v0Xb7VWMUnw6Lj965+Mar
f7uMDfcg1bkdb4QeWDqb6twmBkaPiK4qbu8GeW5nHM7N7SXB9npqScrPa0iAwkgZ7Jax4R6k
Grc3Ob7Tey8dEbe5nXU7t9nGIbe/DkXvCvzCf1cgtLxFPQ3jcyCPGZ88fOFKGLKVRX4xR2Mk
Zny848PSeXQwnoYznms9N7fDy3tpRVdRfAeJ0kk5yQiUqMrt/cgFnbB0HhJuP/yy3YvYp6tX
2gbczjgM3yOYktvZ53ZhlaH4DpJNesHtIapx2zvElieRN3yKj/cmW/OQtP7ZgdyO46NlIm47
7zj97Z7gKnPhvYtvsCiekXYzrt8MFErGbWbL47bDTPd3kAcUio7dYzt2fvP99OPh9WQ7NnE7
73Bxy9c5Nw+3t0/JDsD/vMQf9mO/C2QpI+Aa4R8KJeR2dsvz3kvnMxGvd90X7zhC7noYJdR5
RlTvnngEd/HlksNv3H6+hTcht5P3ipcoFcEWwm2t3AMaIyveFghzB4neFfj5qf8GgZDx+e3R
Oy+zZ4b2b9ocecdeI6/5djqEVivjk8tZh6/4nk0nZDxFlbjEwwfjD5XZntpojw8FknI7WFZY
Op9aXjj5gvXrvrZsx1sz4nfQ22l/4yng9vYUi8JzRYfkaI1vVm7Hm/P43hcMar/gHtAQ2W2p
rW4AkCcpt/NbnrddOvSC4P6Vrv9Cxd5u/ZBuKAMrcZNkw+m55doWHS7bfWVablMyCHD7RNnR
NtiAQDYCtzsUw/qxH7uw2SPZT774S59PqFXcfm24t9nZbxW+mdjhi3w0Obfd9lHG7Xf+I5dD
ZQjbeKIhA/Vz+52XzuIRMviNkqBOd7Imnb9ObldiPPHc3s258OPWhnP4WojPblfjtl99KL4j
ZMhtPCgZIDG3seXhtOzPLILH1S5otXI07bysDy/2Vu4RHa9NE3MJpaNXhZL7hFt3+TNyO/qB
ZBS3Re8K/OzUdwWuJksuW94voKfA+D7R9tjZrae4jPJp9vbLFTdRkyWdmiXtEDv8OvH1jet9
GA8NkSlqwW17GXAb6pSe28xV1e4I3IaKskWt5eYd+hK4fb66uZ0gsCZwGyrKlrTYcJsL3D5f
3dxWLzNwGyrKNsfgtrnA7fPVz20CtyFDWYMWD0qsNT23Re8K/PRt3hXoZ/wDjIcMZc1k7R4E
qml6xr+BDLhN9+Z2sfje+BfKRmkEt52lwbeXmNv+qsLSMZUBtx/X5zaFVQVunyd7zILbxgK3
zxe4vX1220c5t0EEaw3hNh6UWMqG21g6PbLgNl2e2+FjkvTPvqD4DpM9ZfGA21hSbge7ISwd
U4Hb60dw+zSJ3hX4SfqugP0TEDwMNxYYf74sGP+4BePd/tn/WCw+QvFZawBkwW1bSbm9xB9c
0DJjApII3H6kfwMgRnW2+AAEa43YHONhuK2E3A53Q1g6pjLhNmk8zsftJa2p7XOx+Ag8sNaI
B9d4GG4rIbeXZJG5oOGo8N5CJtxWaQZuJ5vo3JsoFFxjnqeMjvTdNGJvDG6biuL14sm7FO6G
sHRMRfV1Imii0jTcfg6KEmx7f0qdisWHn7/tNeAxCb6YtFWV20t4tHdyQbuhQd5aS/JkV9ZE
9K7Ajwz+rsAEjH9x3VNwObrmchdQqPYagmMw3lLxqvAUL6y4E5aOiZh9aUMTpc7ntg7b2Qso
PnvRkJSC24ZKtzObooXl0k5YOjYSJPBu3E7qx/lXY6ZnL6D4RqiZ28XZGHM3eEeFq8AF17LL
CkvHXoIE3ozb0MSKay2z5ON6zJDEtzIoYAg6RYKSBrehg8Sgt85tyl7xGgwKGILOkeC333W/
IF8RuA1lxW2ZOW77jWg7kQV3dic+t0TvCvzqD7/Lv0EAXUVgPJQVB2MKqU4x4z2wUwbyF2U8
BE0jcBvKiX34QfGWe0leawjaetf4HhAEaQVuQznxD62TLycLpObBjYfhENQncBvKSchtiv6e
RtxYaBeCIKnAbSgn/vF0+jJg+KdogmvshhvchqA+3ZjboncFfol3BUyUfZIdnd7/gHR6V+Du
E2A8BPXpxoyHOiXl9vYPtjA7cXZzji8xIahL4DaUk5rbzKXcu+WMYQiChAK3oZzE3KbnZ/bd
7sw5xjAEQUKB21BGmcfQHLe9P+DOWYmag9sQ1CdwG8pIzu3XP6vKXWFhDm7fSaJ3BX6BdwVO
ExgPZWTDeO6hCl4+gaAugdtQRhpuu0f2z5ywz2DAbQjqELgNZaTg9teXmOA2BB0kcBvKSMHt
7QLTgcE5uA1BXQK3oYwyfC5ym7kAbkOQtcDtt5PoXYGf694VAOMhaFKB8VBGSm5TidvReXAb
gnoEbkMZjeU2ZwKCIJHAbSgjI26zfygF3IagJtHXz6rgNpRRC7czdsBtCLLQunLAbSgjJbcz
rwyyF8Bt6PYSvSvws2F/V4C2NQbGQxmB8RA0k7xlA25DGYHbEDSPyF814DaUEbgNQdMo/K4J
3IYyArchaBZFrwiA21BG4DYEzaJo2YHbUEbvxm3RuwI/xb9BAE2ueMGB8VBG78Z4CJpVS7zq
wG0oI3AbgqYQJWsI3IYyArchaAY9sQ1uQxKB2xA0g5bkMQm4DeUEbkPQBGK221fmtuhdgZ/g
XYEjpGQ8lRjvklOcCQiCEi33Yjw0VkbcJnAbgtpFzCMVcBvKqYXbzAVwG3oL5RaGtDmVHlbG
W6Jh3KYgBqr+21j0Ci0KnUsGt7PbzpDgn+HK+IICjeV2b3TvJGI2XKXGr5YdN0clg95Hr81v
ylJKT5X6rOdc1MolvTlnZ3F7H8naaPsUBsj9iJCM2B/zi+m+g8RZxhcUSslt/NvEg5QuFm8x
L+Hx+mk9crmmxQUSL7vQw7srnY2HP0miPmnKibMaMt8/P4zbS8RfNh7ntfZK6xGfdnHH6OQ+
MFqv+A5CZxlfUKS0iNbT4PaB8hZusjtb/Cb+ebeejS57x/kFEi070bsCP9rfFUgh88ZiYLwi
inI/0iz8bCzxXn1hNsNbD+/CWYwP3zrbonbB+XhwD68a/QzR3owp8eg44wuKlanBpGYrF5gk
E9Iu1hLIbefJ++gd7w1pWzmlpr6X1CXr7e1FaUlv6aFMZYd9aFmiJHNT/Aj2WeGiOYzbzMNr
tlK84IkZTHB1PUl7sz0XfrekRBNfUKKwUDZlU0ZJNefaZyxDqShaDy64sH7Yc7wX997Tb0ph
U+cZSDY2sbft05uLAnZtZ56HmdIO++yUIv9JwhIbDj4Gq2YUt4Ma4xaq34D2CnMvoq5RR4Px
62cJUey+dvXPo7VaXeos4wtKlKFrdgUHJCm2z1iGElG4lCl63pgcr3ig19Pu55dQbNPcAuGW
HR4/BkpK2jtBmTwtS8y7bcZcgO3oG4/QxHZtCm7v4ZIXOTcYnw0Ufim5HXyWrcuWJe8LSqXl
Nr+2OZqD21JF9PTfDMhz2z284lZzm2cIuO0pXgIUJtglHaI+MdL81zKiH3JiN+vxcdx22Qbk
Fad3GBQQU2vbhnsr1t2Sy5VlxheUqonbyRWO27hdCkVJiRIDYO94CY/ctw65piJus97eXhy3
nXex1idNrQfyQs49E6O4HRYcs6LjSvGPPRPbPjrpFXE76V7gdurrThK9K/CrP2T6dwXUjCfu
CncSjBdqSZMdgOIRH3vto8OkafGH12iJgvGB4lkJPlP9q/8l7uCf2O7i6crxVuQMjM9sAvw7
GHmIdp4JF5+slWXGF8SIx2ue22w+M+cyFiBfxOR6W9ZZbnudXaFpmdvraZd0g1hubx/q3Kbo
drz4KX88uAneT726HcftKIaoUpzfdGvgDcbFvfbbj5bbqS+IkwW3CdxuF7Ns9g33IG6zyw5L
JVC0BMIaJz5TCbej/h7WHGM1tj2I22EocaDrOS/AtSnzdczrU9Tr1TY+WSnLjC+Ik5rblF5i
ToHbUrGpXjfcI7m9OWV3928vhtsuuFruE+NwCT973PasRudm4fZ2PihBf3BRr1cT99BzO/UF
cVJzm0kol2JC2kUiPtVjuc0uOyyVQNG8pB/LfaJ5DVmZs7qf/Do4kNsuaeH2q2lkcTaiXq8m
7gFuj5Ke28kegds0gNtCMbudT732YwO5vZ59gNusnjkSvSvwy+hdgSiP1SXGMj5uT+zsjGb8
svjBLFXGu6BnePBq7/JtdYxnfEGceBaXGJ9klM0wGC9TJtOUro/t2EttB+N9Z4yJt1d8H+zj
NgPHR47b2zwN5LYLuO2y3E5HEV5/tXfp2bVKo1tE7MA75n1BrBq4Hc1aPIklu1AkymX6eS7L
bfeIDxXc5pcdlkqgcGJiwiq5/fWJf2crNXMGt8PQtNx+VivPbQ8E4LadWL4SW2WZPtkSZs5C
kfgd1yYextbcfjAm3l5Vble2Oxy3XaH9rs3XGG5TQOrwk9fEbRGG8a7XecMu+LR2cmH3ArdT
XxAvrnQq3M4womoWStSUaOLqX8ntmre3V8ptF10t9wn6Lxwdsz9sHcDtb//vgk9JExeEEgYm
5bYLG4PbhuJKh98dRA2+LlMuveC2SG03yC254PYwWXL7tQ+iaEnkFs/a9Uhuu7iJ20IJA1uv
84Yd84kxBm53iwHssojAvYq7Htf5URK9K/AL278rcJQEU8Icb2sMjB+mXsbHmf/8MAXjw/sN
e/exZfzWGow3VJwf8vFd/iIzj3h8hSkTFXOcf3jlE9iVmoLbrbLgdvBenvv8b9I8x+3P8+O4
vcfC3lEE3A7ax72iT2u9gduGaiYs5akNbgvVyu0V3M3cZn1iqXjq5XY0CV/H0bZ2Jm4neze3
XQ67vq671HCW2ysNwG1DjSEssi5SM7df4Aa3h6mb2xRMwgtNLm7OJZxWbn//fVPoRa3B7E88
xnP7lQtw21BxRdpoiNH7qZ3bzwyD28Nkwm23nV4zn3exa+P2iP32apy2H9jSnwTMuf38BG5b
agRix9wM7qfcjsu/zh2vn8HtYSpym/hUhX22NvssU2LE+5xcGMLtNRgZtynDbdG7Aj9/viug
Zfz23Vl60S9hMF6uEQkiJF2kHsav7wq5UlMwvlURgBsYvy4CCmYpMuIZTS4MY7x7rFQPie8H
4LajsO8WoC8X9vL9BCfAbTuNYCy4LVMXt1/Lx5WaZhdIuuywVAJVue0eifg+s3J78T6FD8Nr
3F63DCpu+zc7cLtfIxiLpMvUx+1gcSi4zS87zFogA26/VpY/yf6+9hRu706P4vY+ZHDbUpka
7NIAk7dUI7c9DIDbg5Qy2GUv5k4vr/c6ZuP2Kzg/BOK5Ha5kr2940kW9wrZLfCpflkx/KCN7
yI64FdxSbdzeGdLM7fVcdsv+9kq5Xd8MJiD+bBbi2et3Ored9yn5dtWt8bZxe7PMlii4bSD7
DBFyLlMbt9n6L3Nb9K7Az/a/KwDGa2TC+M9eFDSOMRg0jy6MYPxenSRiPLHcJf5kcC/TM573
BWVkT2TkXKjDGB8es8sO0xYohqqfG8pkKgXxV8vZuO1eXlxw0/YiCbm9+Kc3RAcW4178jl3A
bcYXlFGQbxOZG7yrTuM2s+zA7UA1bru4A9PnsX7t4PzPvpVTub2EP2yFAbi9QxBX3DqAefAl
TYXbftXtDRhfUEbWmLW/EdxVEm6752Ft3xI1rS2Q1UPcoHUkt1MMVYo2k5I+67mQ2+uHM7hN
QREQWxLJ3T7ovLZ2SVta/Ot1bidnM76gjKxTREi5UBJul7bW0cn0bGaBcMsO3A6UQDUCrqhP
0tj/dBq3X8fho3fKc9ttHbwSc0lbCmHtIdy77nVKfnrM+IIy8qfJQiel/ILTLOE2ua/DCMb7
dVdryi4Q93jEbcFtXwlUKQCuSzpwfR7rgxLPCHtPDXQSt/dQgsD8Dv6xd3K37b46egSPuL2f
Wxxt31v6D/gYXxeS6F2Bn57wbxAYM976liHUFUuCKpX8dfmZzAgO3nXPUtI0v5gesQUwPhDH
eLdfkvV5rIwP0MU8Bgu0ztQAxvux0BJ+eoVCLrz5kM/opHm8n3gZ5ap1Pbc5+Dwv8QVlZJuj
c7hNp9wsOiXi9tcSCep4TfDWfXldD5sWF4jbAnCeWSyVVSlUY/5I+mzcXoIPZUNri0HcXl3S
EgQQPs5Iv3YNMf9Ix0CvWgvG+Niqda/11cHG+JoviBeZ5uicjJ9ys+hVCNNUz1QmK2Gdr633
VucpGLIL5BFY2L1BX2Jm5pmeAlGYPk9areeZ6cmYOYHbuZdintVGi//HYNdHTLE9rtZoiZuu
DuK6zvmCeJEp9E7j9vXmWcbtdSk4/7xL3xtJmxYXyCMGzSVTOEo5Bhewnec2v6s4ntthveW4
HfNgG3UQb5IMCmqN6Z80paRpxhfEyzJJtjeB2d12SsTt6BnpwyeIKzetL5AlPNU5nvuImxlK
Ulbt8+I2cb2owO1PM4O4HfjxYe38ds7rtlZPWi4LQ/s0R0mxrg4oTSfvC2JlmaSTEn4vbtN+
ef1v0G4Dd2CKaVpbIEt0pnUgF5XoXYGf1N4V4GcxN7fZqytViek3L+Mf/D9sHMUbxb+t1kwW
wnP7w0AmxtQXxMkQkLliHK5LTrSQ8cxSSKFNfNPiAkm2UOLI764yocV9tlNMbjNLZYOcPbfD
ook3CU7SPX/VdpeFYpTILkun7ZEvOdHZLdfrP4eO6ZIZHCVrbnMbbt7HVhNjuO0ynx71yQe3
Z1NLleYtmRjS6rQbRo/A7Vllze0HuK0SilEis5yf9pjkojOd+1G5dPXYWN5UA7jNPihJfWxd
zLlNQYAUhUvg9vVklSa7jXuT63M8dyi35dqvHhvLcd4mlyG3n0ckfcA9mNtZ71QdL7g9nayS
PjjdoncFflT/uwKXfajimLPP/4Lxx4rcdhjy2rtQUI3xiREu4zt6wXioJqNnIWey87Lc5rZn
63/B7SM1ktvcw3CuZPdz5txeghle4vkGty8om4chJz5SuehUg9sTaQZu70aGcNtlPj0EX2KC
2/PJZMNttGtv1CWnOrPleh6A28fqaG5zKd9PgdtQXRZb5VO329d8UJJZutlrx0byZqLwKYLb
P7m0cSqm/KnM7bRkvTPW3KYgPkqirb58Am5PKIO98rnb7YvOdRo0bfUPbh+rw7md5tw7cTy3
t4+idwV+9QcL7wqA8RMqnXO1zt2aX3Su2e3Z6wQYf7D2mYh4KOvN1P/iTWZ87ZHOvv95COMz
n55nXHIUCNyeUUtvqs7emt/locoCbp+lPQEBg4V5KXKbeCNR0v2P1twOF3i63LcIc+sI3J5R
3Rvus7fbF+U2t3Qde+XYON5Re/34xZxBbizidj7bQ5WckfDZjW9gKLeZYMHta6pzw336dvuq
kx0WvH/7BLcPVph671DSmeX2ZjIHNX/2w52PMbfD8Hhuuy0M9q86FBNhum2bACaXUeeG+/Tt
NvtXUK+gaG/n/2h94HiwVF7E4iTv7KKzLy7nbWx5j9efMbfD8Jhgt3Hy95/ivi7+F407Q+1/
aPtO6krWDMue7ErnUC3hknkOQlO8oncFfll6V0AVLpbVo4/xa1MnPL+JPD9+I1vGUzASZlw7
pNkRUzkRlTE2xWpj7P7qub1a3prbddXZjhjxlchjixdL5VPN3KZC67oJFtum3KYgOuZOQfvV
3B28PApbAKAYNeq4Z86R6CmCaNG+ktxj+7W/Y3M6xwzeUVRfVdzKG/Dvz8uUi7dcIIJRKoRi
VIia167t3bZZtrVzqMhfuq//HFu8WCpzaTpuFx7ov7qxvdqEYlSoFb/twLfVhbnN6tikTjGF
0KrTuJ3/U7GVX1YyXXvCX4yCPtX4pKTjAYut5rh92OnY4sVSmUnncRvKSPSuwC+s3hUYpLZN
9jLJ1vyybxhCUCIwHhKrBcGzPFF53O+hCvS+ArchsUj/eKShyzhNcweBoD6B25BcagrTPE9J
HuA2dBuB25BCixLcU2EbD0qguwjchjTSgVuL+cECt6FdoncFfj75uwISgfGQRqTB9jLX1hwP
VaC7CNyGVJKDm6bDNjbn0E0EbkM6LUIcT4htcBu6icBtSCkZuNdW7pCYpJrtRgJBTQK3Ia0E
SKY5sQ1uQ/cQuA2ptdSoXG3QItG7Aj+ze1cAD1WgWwiMh/TaGJ79Z7On3Jk/on8ZFoIuKnAb
atCSZTPlL80gPFSB7iBwG2rREup5kriTcwkPSqCLyXEnwW2oSRGjGZ0dIStwG7qW+L+9Dm5D
jSpT250dXkbT3lEgiBNfrwO5LXpX4Kc3+LsCUF2l7fnZsWU1dXAQFCnzwyT25lC7rrYxf+Ch
CnQtZXZB4DbUIXbLfXZQZYHb0HWUW1LgNtQhhtvu7Jgqmv/OAkEvUW5RgdtQh+gFQXrtCi7A
bTwogS6j7M+w4DbUIYpK6gJMvB23Re8K/ATvCtxc+QeVYDzUoQsyHg9VoIvo9RMv91QF3IY6
BG5D0Ci9gE3Mhhvchjp0RW7f7qEKdE9tD0iYDTe4DXXoitzGhhu6grxtdgpucBvqELgNQWPk
wTp9UgJuHy7RuwI/ut+7ApdkPB6qQPMr4HqyOQfjoQ6B2xA0QtF2PAY3uA116JLcxkMVaHpF
oI6fqoDbUIfAbQgaoOTpd8RxcBvq0DW5jQcl0NxKv7SkENzgNtSha3IbG+53kOhdgV/9gcu/
K8C8CR5iH4yHOgTGQ5C5uN+8DFkObkMduii38VAFmljEbLcjmIPbUIfAbQiyFovtENzgNtSh
i3IbD0qgecU+JfmUx3NwG+rQVbkdxw1B0yiz3Q6ADm5DHbLktuhdgV8e/64AHqpAsyqLeB/y
YDzUobP25t1O8FAFmlPZJyqf2pj+w++/PzAm6GY6i9vdXsBtaEo9sb0km+7oPPbbUIdO43av
GzwogabUIuD2gv22RNiYZXUetzv9gNvQjCIRtx322wLhJ+qsTuR2pyM8KLmAllurOmLnXaCw
6w+//641qaJ3BX4helcgDGoWuUrUnBbQICdazmN8n6c48ml02tIoCrmwV3XAzrtC4ZVxe/PQ
0Sxy1bhTffazzs5NRMuJ3O5yRUeFqtVJC6Mi5MJe6XgpbODyl34Mblf11dE6PfcQLWdyu2tS
Zp3UU5ZFVciFvarjdd4lCi+B23U9e1rn5xai5VRu90zKrHN6wqIQCLmwV3XszvtIYYcffjfq
3RM6NykZuWrcqdp73l60nMvtDp7QpHN6/JqQCLmwV3XszvtIS8Tt7+zTvTmaT64ad6qOrncX
LSdzux0oNOmUJiUrelfg5893BYavH4kmydutVB278z5S2GHce+FUjexwLV2Mn5IIJyue5KOy
9OlWVP1lG7MV6KfmK7TzVvKcM2Shek4r3B66Nx9kulWd3J5tPU2gM7lNneCmOWd0vqjAbXt1
c7v9vfCKbsjt2RbU+TqT273gBreFArft1c9tPCeRdAO4WZ3K7RXcrR7nfFAyX5WB2/bCcxKF
OriNLzJZncvtTnCD2zKB2/bCfluhHm7LwS16V+Bnx/8bBGfrZMb3QX7OhyrzBQXG2wt7c4W6
GG/xu3+309nc7gI3uC0TuG0vcFuhPm4D3KlO53YXuKecTXB714zzYyNwW6FObgPcic7nds+X
FFNuuOeLCdy2F7itUC+3Ae5YE3C7A9zgtkjgtr36uY3vMBXdAO5QM3C7A9wzziW4vavoWPSu
wE9v8K4A9uYK9TOeAPlAUzC+/c4741SC8bsmnB4jdXMb7xequgHcgebgdjO4Z3yoMl9I4La9
sN9WyIDbvb/7dzNNwu1mcE84k/OFBG7bq3+//Z19UJyjGWTBbYDb1yzcbgX3hD86zVdb4La9
8JxEIRNuA9yepuF2I7gnfFAyX0Tgtr3wnEQhG24D3Ls03Ba9K/AT+3cF0jps+5ICjBcIjLcX
9uYKGTEekN80z968EdzzPVSZr7DAbXthb66QFbfxBwpXTcTttrspuF0XuG0vcFshM24D3C/N
xO0mcM/3oGS6gMDtAcJzEoXsuI1fyHxqKm43gXs6TE4XELg9QNhvK2TIbYD7S3NxuwXc000i
uL1rtrmx08D9tuhdgR+ZvCtwc8YD8p+ajPENkJ/uocps8YDxI4S9uUKm3Aa4H/NxW/8lBbhd
FbhtL3BbIVtuA9wTclsP7tmmENzeNdnUGArcVsiY2wD3hNxWT8psMwhu75psagwFbitkzW16
e3BPyG0tuGd7UDJZOA9we4S6uY13Bju6vT24Z+S2FtxnT6DoXYFf/Tr3rgAYv+u+yxB7c4XM
Gf/2v0k/JeOVkD+b8ZHmKydw217Ymytkz+13B/ec3NaBe7KHKnNF8ylw217Ybys0gNtvDu5J
ua161gVuVwRu26t/v/2dfVCcoxk0gtvvDe5Jua0D91wPSuarJXDbXthvKzSE228N7lm5rQL3
XJU6XymB2/YCtxWy4bboXYFfsu8KvPUfKJyW8Zo771wPVaYK5ktgvL36n6ngO8zubu8L7nm5
rQH3VA9V5iskcNte/XtzcLu/m+bJ6600MbcV4J5q7sDtXTPNi62w31ZoGLffFtwzc1sO7qke
lMwUy1Pgtr3AbYXGcftdwT01t8XgBreLArft1f+c5Dv7oDhHM2ggt98U3HNzW/zFw0wzB26/
JHpX4BfbuwITTaGx+vfm39kHxTmaQSMZ/56Qn5zxUsjPVKtg/K6JpsVY2JsrNJTb9I7gnp3b
wrvpTA9VJgrlJXDbXuC2QkO5/Zbgnp7bQnBPNG/g9q55ZsVa4LZCY7n9juCen9sycE80beD2
rnlmxVrgtkKDuf2Gv0l/AW6LwD3Rg5J5IlkFbtsL3FZoNLffD9z+JIveFfj5/ncFZmS8BPJg
fEFgvL3AeIWGM/7tIH+FvbnoWdc8D1XmKx9w217gtkLjuf1u4L4EtyXgnmfDPU0gm8Bte3Vz
G7+HadvtvcB9DW4LwA1u5wVu2wv7bYWO4PZ7/dHBi3BbcDed5kHJfLUDbtsL+22FDuH2W4H7
KtyugxvczgrctlcHt0XvCvzM+zcIsDe371Z/8nobXYbxVchP81Blljh2gfENonq5lQ3gmcqm
g7j9RuC+Drdr4Aa3swK31XoVW34uwW2FjuL2+4D7QtyugXuWCQO3d00yJWrt2M6NANxW6DBu
3xfcS6rKZTcojKZOlR1Q5tKhmiQMT+C2UlRfAOC2Qsdx+77gDmuyzu0xUbQZLoIb3M4J3NYp
XiIu06ZsBdzedCC317lrcDe7NNx242Jo7JaflFHTJXpX4KfeuwJygfG7rrnYgorMJA+MV+hA
xr8R5IWXrENo7ZeNa5LZArd3zTEjSlFUYsQNop/beC98TLcbg3sdWo3b4yJoNl6IjOYg5hxR
+AK3VaK4wIiZUOy3FTqU27f+TXoJt91Y/+09c+CeY7LmiMIXuK1Sev8fwW38HuaobrcGt7fl
9k8fstl+dC3ofHhz/HQ0X8WA2yql6aJ0FNhvK3Qwt98P3PtJN9Z7R21RErV/xXUEZaMpgggE
buuUTmA6o/377e+aYqvrstwWvSvwk8y7Au2r7s6Q9/bh6Rk33ndz3yzkwXheYLxO6QRSfAJ7
c42O3pvfHNzxTpzbrQ9Sl4/spBwSek3zlQu4rVP6nWX6UAXcVuh4bt/8DxT6pD7secrLcUfv
HLjBbVbgtlLgtq1O4PbbgPvAzfaje0FnwD3Fg5IZYggFbiuVRA1ud+kMbt/3N+m/tO+yj8R2
94LOgHsGZs4QQyhwW6nkQUk6DHBboVO4fXNwR1tud5jTPgM8uGeYp7fhtuhdgR+J/67ABFPX
pGi2aQTj8V74oG5+/xngMUr+9vwon/2uWMjP8FBlghAiYW+uVfgMhVsY2JsrdBK3bw3u5KGK
O8KrQTa5cMFtTpNyO3gRL30rry4KM21ZvJ+GqLQourmN38Mc1S20cEtwJ9A+Ct0WyeSCnWCW
wO1dcm57OSOvDnPHW7u9W1gNezFn37Cq2i6tiHpOF+y3VzUuif6VtE5jn5XZFBenr8GuTTww
oU4wSf3VZq3zVnLRcfAwItk5hwRNj9dWYR8v9/5l/9gzkrWdrAwmeOy3xTqN23cEdwHa44dq
Yz+NlM6n5vkRxJqU28E15s/vVI4p4HRatxRz2KVGMrYTbK9dd3VzG/vtUd0CUW4CryPRuwK/
+v3puwJJGR9LeSPraaDD705VzVdR0zLebceUMt7tl0qMX4IPmX4lxjOn48Wxx+kHDMZLdSLj
7wB5TwJqDx2sVW0l4Aa3U83JbSpwmyL+5o6X9WGMX7Wec/bYM5KxLVgG4LZCZ3L7TuCmDKCT
88MKwMx0HKe/Es/R6QEkmpbbi9/QRddc5fhVt1/fhAaF6zd4MMcabvtB5aNnBW5vOpXb9wF3
eTMRwntcCDaGKIoT3E51X25//feRqdk+bldGBm4rdC637wLuOpb9ZeBGxWBkKQb3wJuNTPNV
yJzc9osrvttquL0erxg34DbV8wVuK3Qyt9m3i68mj8mu0GwwuA1rK7qbnl628xXINbide4VI
zu21jeMbMMaHcFv0rsAvg3cFwPhNZzP+BpDfEe+kDUdUgaXVEPJ09vyc7T/VlIwnv7Q6GR/Y
evQz/oG9ualO5/blwb3T2LatVqZGQ3APutOINV95zM/tuMpauO32zkkDLbepOoXgtkLnc5t5
u/hK2lDsRM3HgdvWZgDus6cH3N5V4bYLXvZw0cXKcR77/dzm/sX5NPxyC3B70wTcvjS4N2wP
6yCVsUkf3GQ63XqB27sKjheP22TAba+3AbepljBwW6EZuH1hcK8Udvou1sO1tuiNDNyONS23
VzxacNszTS45q+X24/XnrLyYQoHbCk3B7cuCuwHbj1FP9M3z54WpnRzRuwK/YP6ugEnUzthk
p2ZkPMWMd/52WMf4+K5uwfjteWIh/syl3UAQFBh/ULeSvStCvpHWQyBvn749zJMLF9zeVeO2
99vvhtx+uKhBy978q0M+c+C2QpNwe93kWtocr+agR4B7QPa28SXL+FiB27vK3HY+tx993Oad
dzwLf7an3GSC2wpNwu1Lgrsj5AGjHZG8Lcxzpwbc3pV3/NoJfMGaXtPmtqunc3s7zo0A3FZo
Fm5HbxdfQdTDXntwD6mtNUxwO9Ss3H543HZTcXs/zm24wW2FpuH25cDdhe2ViM4unjG19QI3
nToz85XFhNymtRqXx7b3nojbVdvgtkbPVIjeFfh547sCI1bdxSDfG631aAfV4bLJjTAvjeE8
56ymZrwLn6/sl13lOOCwe6TqY7zXIjcAfmieSz8qMP6obmVdCtzUHetztFbxjOI27eAeYV6k
+YpiUm67rxYufL4SXS4cD+Q2j/BkAPzQPJd+R3D7qG4VXQjc/djufSgTa1Rt7eB2Q+wLNF9N
TMjtbYZo2fbe4LaJwO262YuA24K5Buz3NKy2NnC7Mfbrmq8kJuX218GL2+7rpFsvn8ztZQG3
LTUXty8DbjLZKptuuMfV1gbuQfarmq8i5uM27RO0uG0NTcVtrmc0AnZovns/KnD7qG4iwxcA
t9VO2XKsA2trBfco+zXNVxCNK1n0rsDPzP6ugJjxr0P/uqscB4wP5aIGYPy5mo3xI37TxV5W
bLa6V3xqZNLo3DvvbRhvoBK33X64P19Jrwu47b1yBG6D20LTs4ObzCK0szSU2yeDG9zelXPs
TQ/tx+C2hcBtoe3JwW0Ynx0Ox6YsWL5HC9zeVeK2f+y+jjq4vZ70zYHbs2hCbk8Pbm8/Y2PL
ZKiDM3YmuMHtXRnHxHP7UWU1uF0XuC22PjG47VC7WXMGhkYn7ERwg9u7pNxeD53XoHbs9aOI
20kDcPtUTcltmgXconcFflp4V8AYdVZZGZ7b8yYQjN9VYLzzjvsZv7uxYDwFpsH4Xk3J+Hkg
z8hsM21s7yhunzAp4PaujGO/iEJ0eif9LygfTOMQy4+0p+eFMkZiP95pxqMvcFuhObl99ktq
JZmzy8jg8Npab6bHl/B8lTAlt9fjPLdduXHIbZe28KY/oG/M7dQPuG2rSbk9L7itt9uPcK/U
ZaU/lJqHc8A9XyFMze1gigJaMo87ctymHLfJJf2S5yT8YxWXnvUFbis0K7enBfcAcJGJyQO5
fXQRz1cHs3E7KKGQ225v4Z6776SxYzumT1WeHZ/Ng8UZ7bE5PwRuW2pabk8K7gHbbaMN9/ja
orPAPWcZnOO5zu1wG/DaHr+2xJ8XvBImF9Rz2HF7XfzVYHntWb4ueFXgGdkOIz9+4FsVeeGL
3hX4ifeuABiv0LyMnxPyQwhHFkYPZfyxZTxdFUzHeH9OIsYHz663KXReP57x6+Z8a0DrzMdF
4BlZD2M/jzLjtwvVsTvvI7h9VDe1k9nATWMCsrB6QG19hnnG3XSyInhMx21KMOr2S25r4tIX
iLaC9m/KG2Af6TOXZW/qEiP7IQPnAO3gdp9m5vaE4Cau4OYwexC3z/gxaK4a+NRc3A6mJKTi
FuiL28nsUZbbDGFfHxLw0m4y52d9Gp6vdHBboam5feKvhWQ0ilgGdg/I03NNHg9ucHsX59gH
bAjb/TDks9eZwscg/uV0+b0+ZZjsHyZ+dg+ZkYHbCs3N7dnATaOCMTB8RJqye6kj3M6kubgt
0cptJnT/EQdD2ujMGoVjjeyHXIqKZQNuKzQ5tycD9zhc9Vs+iNufTkj0rsCPnu8KHAx5MH5X
N+OLps9clWC8QrMzfirID9uaW5g+Iknr4l+OBTe4vWsgtweWt0TgtkLTc3smcI9k1aW4fTC4
we1dA7ndX4NdArcVmp/b84B76H6kG4OHpGjLwKGTAm7vGsntc/nUz+3vB0TFOJpBF+A2zQJu
Sel3Ge8a4rHcPhTc4Paukdw+poZywn5boQtwexpwj30y0Gv9kAR5q//ASQG3dw3lNoHbnE6b
bdG7Ar/6ffl/g+BLV2D8JL9JP/SRSv/O/5g69HJwHOTPn/tYN2X8A4znhL15o6YA9+gIOiF4
OLePA/fpU58I3LYXuK3QNbg9BbhHM6pzgMfUVrD8jwL32TOf6q7cJnCbEbjdrPPB3fscQ+Sg
ozxO4DYdBG5wexe4nesAbg/r1qHTwT3e+xW4HQZ5ELjB7V1juf0AtxmB2x1aTgb3eD717ejP
4PZBd9PLcFv0rsAva+8KmMmc8RScbqw3MphMMF6h6zD+ZMgPf6TS+1DloNqK8nAI5C/D+ANk
ze14Pk2Nq42UW4Dbmy7E7XN/IfOIW8YVuB0HeQS4we1dg7ndJnD7aF2J26eC+wjHXeV/EreP
ADe4vavVcW6OTFaUiZELc1v2U0rehtNE87R1JW6fCO4DHpN0Pig5Ki9JJsaDG9ze1eQ4+veK
I3vgdkW1yEg0eLbRa/GoE3gtbp8H7iMek/Rt6k/j9vgvHsDtXW2O8zMEbtdVi0xUn8Q0WiLV
rahcmnXrly24Re8K/EL7rsAxd5aenwAOo06aitGQB+N3NTrG3rxDAsbXR59dNoGkIV2N8XTO
7rwHqAe5OSwpTBUPnhRwe1er41xpmVS2mZFyi1txm6O2PI1X4/ZJ4OYLk/Z0682xHTtGdii3
Xep84KSA27uaHRO43SoTbkc5ymBbmsfLcfsccGccqm+TtX4dPDguJVwyhk4KuL2rw7Hkd3Qa
9d6/oyOrfL+Vt3FrA/f1uH3Kb9JnZsZLv8Zavhu1D+xcbg8FN7i96zTHw/VG3C5hW1brF+T2
CeDO4lR5l6z3amffcQuaz8ZAcIPbuy7JbdG7Aj9XvCtwd8bvS6xIeNnCuCLjj4d8duK8m6zO
Wq7TdRlP6jyIBcbvuiTjRbo2t53Iilubl1UP6ZLcPhzc+VyqbpKCPjwThVab+rW5YnyNAze4
vQvcznWYndvrsmExTcmZqi2BR6tuZjoY3HlXqpvkU94UpUYvwe1MHVuD260HZ1dbKnDbXtfm
tvRBSQHQRTCkLqtt7LrZSTo+ExVgqsn1S2XUN4PvYG67zHnDSdnGc3q1JTqe2+71X3A71+HU
35+XcjtP7bBFzdZVuX0ouEvzVqZwxlgh+CtwOxukLbjBbU/u9V9wO9fhZG67up0Ktf0mNWuX
5fbo3+eLXeWuUXke1B2aiWCZC9G7Aj+TvSuQzYwp5MF4T6s7MD7X4cS/SShEhYeJ6kPaiqnr
Mv5AyBdHW50JXXvSppZ2u5puXcoHaQnuzcoM1RYK3LbX1bntRHaqXJbB5MLcPgzcZZRW9trq
5tfmtiW4wW1P4PbE3CbR8veoXWorgsmVuX0UuCvTVtlAa1trR0Ru66fp1qdCkIpc1JysNuao
Nl8ncNu9/gtuZzqczu169DJQCNuUG5h2s9Yx4K64qO6gdY21SDiF21QoADNwL94es9+aqcBt
e12Y2xLUirH9YkS50bW5vVJwrBf5jBSbCduWkMi2d5tlRa9OFYO0mhRw2xO4PTO3qbb+vf2a
10r0rsBPi+8KUH2tXZvxx0C+Ntj6flvVVMv4Zeum6NWr2ggsJmXxuOZ6jdnqBMafMs1H6sqM
r/1A6iNe4PD23D4C3PXNcn3DrWl5fW4bgRvc9gRuT81tKi7rxRffJLVWbHd1bh/wm/T1WZPs
ouUNlcSj19iPXdCVm5kJuMFtT+D2JbjNNVwiyRzenNvjwa3CcTkM0eQpmXAOt2sVYAHuxWNV
ydcJOoPb7vVfcJvvcCq3PQa48EJMbZsHJdfn9nBwC2wLJ0XGd9IN5jxuS17I6XSxHbhyyx43
LRAGt+11bW7zb3LTEkq6uOkNuD0a3ALT3vQYNNNye1l7yTv1q1aABuAWc7t97sNFVZXoXYGf
RO8KgPH2ujjjY5wzcuIN3FswfizkRZkO5qaz1T0YbwD5xWNVyVUzRJOFJe55BrdPmeYDdXFu
18HtPlsJy+wtuG34u3+pRJPmzVlno4f2S8yTuF2PknonZTC3s0tLIHDbXlfnNltQSW2RrMre
g9sjwS2bNMnSl+JBBwXab+TyTgaq3116wa3httqJdxMNJO+t9dgncHt6bpfB7dlyMlOlZjfh
ttnv/vGW660omaCWJntDeXxncVtQgJ3g3jJVr2G1j/z6ElkCt+11fW6XwB20kVly5euly8bd
BmoYuIVDrS98MRquwW3Fd7u1ZnkHIm4L7iCc6eoKq7jUeezVctY0H6YbcDtbVy405nL9A0Ol
VrfhNgtu0bsCP5L9GwTCGJygGdUgUW2gdrnbfXUS9zGRZCRdkN96WjPem4pGyIPx9roD4zOl
FbdwIjulVvdh/KjduXSo7I1Ycb3B5ZfsuF1OIMWxiwpQOuRcX/c6KBnQcrtMbVEewW173YLb
gt/fEVVYzeWNuD0G3GIoUHndVy4HUnPbPbgFvbn0jGXryYuPc07pRVlm8iZFXd3roNSfdLPO
kTpUPdjasrLXOsbDHR+mek6XK3A7LjD2spMYqVyu2zDrVhJ1G6RcpnqNylqW131pJrm2qgDd
g51oKvI5Fx7nnaWaLMz2Sdn6VaqNVPYTSjPnS942l2KPJvJycazjw1TP6XINbldIJLNG5SIc
wW1aeL06Ztiwvx8WX/btFYMtpqtR8jnLD+0RjMEZ+nwUuc0SjZgoyAubG0E4j847KwiweVL8
onGFdiTLahANFxRlzmdcCh0aycvFsY4PUz2ny1W4XZaFMUXFa7otnJ6XiIfXdn/h4CZlHsek
TsnnzFv2aQA5VnT6fOxsZvtwsTBRBEGnE+SnlfZrxFlnJB431+91UPSjMM8UJHe16O5xFrfd
Y1Jui94V+NWvmb0r8EaMdwY2Bj1TYRBfRkO45YuvSzFhD3mFNRnjBdbsGE85xrvSmSjXFCaf
gscQkhAbIb+FZcZ4KhLebyAwJHFop6kZb6K34TYZ2BjFbQpZQP4nNgvh3rBirubXENwKYx4V
FJcyhqRODbhN7ImoQ8Bxt18QxdgGbjG3kwGU2i3lCqlc9izV/VkK3B7LbVe4dvxsVzWW23wP
Lgs+YLLck0RmDW6NrTwV6rxodrpCi89PjtuMgehM+Cl6XXW/IopzBaakbRSoewi5Lf5hrDIN
olDP4Xb29nwLncvtUoVdidvlV0HqCzZZHPvYua9VFytuq8FdeedFjVBu2WcvWDl1HdxOwwq5
zaTz9VHM7TZwb12qbkTGfWzXjZUdgtv2OpfbpXc9rsTt8jekDdymErcDAlCG2xWPvmcN+IoD
laPJc51yLnO+YEfstMztNNdxKpnUBtzmUr9uuOUoJuWkrNY13C63kWKbfdOSa1NsYC5wezS3
894vxu1CrA3cfpS4HbTu5LYW3MWB6qbMY4PgdDEkp/OZ5zb3zqDoXYFfPt8VKHxhubkvXH/4
L4OqhqSCvJzxAix7hK/FMC/jHRif79D5HWZhzi/F+GKwLYzf0F7dLzKcUBBCC/niQJVTxsNB
jgyvg9RlmfFpLik0TkxYCbej69vmnBQkXsFNi05OWm21aZTPQb2ZsiwM5OXiWMeHqZ7TZTS3
M/6Pn+2q8gXKLWhBN69F3CTP7WihZL4DLDtMmqt+3I8d+hflfvldOHuyakbnUs5tLjjHmCxc
/7SyG9MFqpaTVNtqW+C6YmlrXmynLAsDebkYYPp5QBLb69AN3+8KDee1DOc2P6jjZ7uqQoGW
qrxe/0xnMbf5BhWHqUHVl54Z69op4/igYoba6xp+pkuSyygxXJ7IO5fJ4+ubX3GS90jVEj1i
KmbYt1YztHeoDUViyE5eLmwN7+W/TnuU+u3Yi8MNCqTcYhnJbcrXx/GzXVWhkkt1Xl8ATN/1
LY8EJRR54htUHKbupdkuDVQ7ZQFvdhMaaDxaCKfjtvMuM2FRtE6ZsBselIT8lEvE7S1jacPI
mDhQkTuBaqFr0jIAl3tiaIvWz1WYtyAQ20hEOXVRB++jDbf5Yq8MtSsTFGZYpkJd7VOk6ub1
jpqsbyzwW8Dwu7K4Z90h41+Yjb6BhvKKb+0XLDu1Fany3F5S0y730TtZuP4pt13mrmakH9Yi
5LbgtZ99UFVlRx00kA9AGrosF8JByESB6cXbeTuvgYtbO+2jS0UkJbmog/fRiNvMoIg7GV53
7AXRuwK/EP5dgTA/skF9acnXMhXMFbrtLdInI6vh8AIl01d8GUIoeS5KeasPNGcsoGRaoEWJ
yj1UdvFzjI/CZd2zzdnhSkf1aIO8E01CkDLunCrSpeIysVySxJkmF+JRSESB6Ve4FCfRJaEW
f6Lti6ScgLCD97H39+fzE0bMuainK13PKR2xuGvBJRWs1SPlJjXD7XRK2A1W2V8iEqeib6BZ
Yym3W4xIVeC2Cz8uGm7X4iblxChH5RYptyWWdWGWXJJqEHY5sef2GuEz158O3CO8HXvHtLam
Z+vlYRiMKKcu6uB9tOM2991QrafeHzteJw8215QK1uoeuG6vExG3KXXCkb3iL9VqV9ywbaBM
j8CYfk4earwtz1WXGZ1LLHsXubhob1PLIGkTJJ2UvbmQ2/WcKaKsDYtUc9Mb+K5B3N6jeH1j
5UftHb9ieHgEt5Mopy7q4H005DbzQKDWU+stO1pxsK5wjR9HK7dfX2JyJFko5HYQPrXVCPGx
59o1DrRgjfkolKSEQ2m47byL3ABpj7aaQOXAtOD+aiqbBH8auQRpgqRKh4ovnWuNKWtu0xYf
rdPiHjlub00e9Rt6YyiaVNJiym3K+RnB7cJgRf3jEONw2HG0cnuL2cUtP391wwXnwg51f7wj
LvZUXQMtWHPJJ70NqbLcDnMZpZLPLG3lU8+8uNLisckafwYgnQQq5kcVI1V6FF1pfWtMDeF2
cljitktbG4aiSSUt47hdcpRIn4ryHMsMuMK1nLVSt71zpgklSflmvcrtsrucp2QOOHUNNOf0
aYoydusRadwWPZSKn++255uq6SN9hjT5+FoyUhe0ZCWLTPSuwM+jdwVq1UnyuW+t84xTM2u7
Tfc69iL1g96PF/60YSg9HWwZ75uuRaZNRaGmpYVdWj4Fa/VVV4BDjPOvljH4kyZldxm9MpQJ
JLDfOtCSORcc60xo2lNpvtMqiULle+xHxUhInyFKwqiYF7tIh9qQ+81Q5brQVJP/rNP8j2Ad
Nl/H3pj94e/HwVCa12QplJ4O1twOvzEq9VROca5KuQVacJn1GNsXdttaiLhNL9Pchl05Ft6X
YOEWXOlmJPD5KWKN1qV0SyUXaS4DP53c7nkQKGm7aLid+WFVGd7qtnCZ5FappYR4LedyOyyG
9jVZCKWngzm3F/9KqWd9kZT9JKobKzVKHDhRt62FiNurYfaLTdVQ8nHUuucHqq4l32dH/MoO
FNZZcjEMzfmXuG60nS2Y9RsrQvXjddWGsvljTHvSBre6LbnUDLo5Bs7S6dx+JKctQ+np0P1v
pWUXbS0yVZnFBeo495JYXe5augScpNseRaYJJeRw47gtWfj5gaprKWOv4TuOUsBc+7yP6Ce+
AdxWxbo7VrxRovHQkXffbS0qTTiuMYzUUvuQWPmz59n23WzHFDi3jmRGbr9SU4uMFLkoUYEi
v2Uz2Ta0JHKCbnt8mSY+orfwE247r31XidRTkR+oupZy9s7l9maLwkxEH4PTu12Bb02suwvJ
IMUN017KPqHqP6GpYukJJbRkTMtFx233SE5bSb3Wog4juP0cby0yRbVVmBDzp2Qn24TDz1Lv
tkeQaZJw2z0SbidtWEuidwV+Jvy7Aruv0izlk6Kuu8BjXCsqA6oeVBohRYyPuqWO9laVxG1t
NLF6PgSjlLY7Vqq6aEtQxquVrVWeQf7wERSD4zraSL3Wog5DGP/af1YiE09LFQnkua0YYvsH
NuJx2DF+503C+PCnt64SqaUiP1B1LeUM6iN2eof5i55dc26TNljPieynxzYHI6Wqi8YE8YY6
lwJr83W4sIfvzu1Fym2n85BpQuXLnqWsv5Q+m8V6mIWReIjeBxxx+xFxu+Ktokou8gNV11Lo
cJPT91d1oeL4tNzeQ5aUEDVOjzA1bQkcLFVdkCCJMomWtN6m260/ksOQ22EspoGo11rUIcNt
fm1rJOS26IvHVa44qnrBt4zDmXGb9vGm3A4aVbzV1DLMT6ckmQ5GFFlq6a/qUPSyXYlTmUnt
sp0WBd8ywM24sEIrjY6Wbn7MBtBWTGXtQ/Fs+26249C3eSTqmo86DON2PekkqVHyrJWakmSW
m8bgrLjtRRhzm0y53QpuqiZQ5E8dvdrvnkjWmtvN1rlN+7QUzfrtEyMCLYvEfGMGx0o3P60J
SiRKWINRt1n3HD3i49C3eSTqmo86nMhtycSQ2BgJKr5tEK5qV8RtP8A8twUjrYsyIxHIwF9T
d1WHopsw4XGUjvG9nhdFT/Vq4CTLDe3BTCTl/FhU8GrHnNvbWDzbvptvh6J3BX76fFcAjJdt
lSvBymyJHq23D6RsV8R4fxQx4x9BvfVXCOXGUVWbP0WqMtGqO5Se9XtBxb3C6MK4ZQloypIw
u9SawqFSzo/VCHoKMq91MJ5t3812HPo2j6Sp5r2PZ3Kbaq3kpjZrxSZtgzDamy9eozK3K87q
ouxYqup32NZb1aHsR8FtjVm/lSjK2PJ7vDNo91ClpyALeo3Gs+272Y5D3+aRqGs+6jCM25In
q+WlTr41wcjq09w2EJtn4eSHx3Dba1VxVhVlRlIbKNXyl5dupph49d4KV91qNYimmtuyWd9M
yUrOsKRXew5HSjs/ojTKzAzg9ms4nm3fzXYc+jaPRF3zUYdR3BZFRnvrcghOOrJyy5aBOKN3
T4JxJNwmQ25Tbihltb8zaLDfdqoOZT+U4Xb1ZxmSha+eob2SJKb7C8Ba2rowqOHHmHe9d8vO
s+272Y5D3+aRqNda1CHPbSezl4OAKLKtfeIssKYIpdi0dJ0WVrVuVc8+RZboZOB9M9RbIBV+
5geqrqXYpWaywt6qTmEuuctbqyTKkqO0ByvtFJE4L58tb8BtYR4lVoZwO35A67vZjsNBm0ei
XmtRhzHclkbmMcRlzivKuDrPJVuhS38gJtwOizDh9sOO22FNcgH1zJjAZEvETu9u+yh6V+An
mb8rsH9JlTK++o15PWrSjY3kBf81WbW2JJsM1sY2qZJowrA06i/4x1DGR0vXd7Mdh4M2j0Sd
06jDCMY7eWQMHTLmBKJadkvGKPG7GavHUAjziXMKR8Ix3lUMCRVEzgfUNWMFn9r58rqr+lBl
hFNxmxRJ+ZqASmPhJDE2oomXBKRyGXZI/SulDlMlnxW+m+04HLR5JE059T4O4LbTRMZAJJIs
jNWjJbedoNs+ikwTn9vRyUyziq96JOUs5AeqrqWMxYaYnbJ90Qttb3m76Hy9PoRPrMVjpLCU
BIYrrWWTxBVY88pS10U10RIti/nfAPfz4oXoR7sdh4O2GFAUyLncTsvBeVda+ndAQLAuXe5a
fiAW3I4W7zBuC5LWO2N1iw1Bu2qjsH3Ry1cumVSSoD7YSChtJgpUie1nIirNSWIumUl+mQnD
0tdFbxm/bNhze+Fg7c/nfhwMoaWsi1LnNOpgzm1tZHxFtTFAsC6dOA4n6rY7zjTZIbJEJ2MT
DwFZKpKsx+4Zy3llMifur+lCtcqgz4vERCKoDwm3qX11FPX8+rJiXJTgOMKsS/EoRA2z/htE
ywBue3F5o/cTsR8vb8VtfWSl2pbF4Eddq/ns5fxADLgdDybHbflayoZRDbawdNtWWzqBSgNK
t1R18nmRa5NNjvMsc/ZSO6yZTKQa2e23XfAp6044DEk7Tw1VwDnttsIYdc9DL0I/2P2Y3onb
kshE7wr8iH9XIF+ComjDETYzvuC6nriC40+cU7yeWMa7XsaTaN12DVRgUG9E2YOqxfFCZdKG
Mp7IeZY5e4l92SxlCzuvajZyY8hHWPRXNyW9VSX+JabLTs9m/OL3uzHjXXxFHlK1EqSGXOF6
6XK5CEtWH1VuJzYZbm98r7jKi2QrMRiniy/pvXOzp7OgdFv3seY8tppbfiu3M0AmKf/5QFUy
4rbXquJQMA5uhiuG8lGqkrEcxm3nDXU/7fezj0Qtr38vt7Mzp7qjVIKUquayNKr8QLq5TYlR
lttLH7eJjT1V10Ar9jJ2GyyUVXlI+i0VfCozdRVwO429kdv6YS1CbtfXxhYh1XMpMiYKPRp8
b1bcgdxekgbPr1T207fldtSBNENNhiHuqXFZGlV+IEbcjk4yNrrKg/jYc+0aB1q05x2qTCir
d6l/uVXidnLy8fCXqoTbogcl+lEt67MyJkQvGFF6X62o4GtV1ZbESGxnyQ1DlQzRUDXaovLT
+HlI++k1bNoPZXnSSJjTbIbtuM1FphlJtgRUNlzFRe66l8ekST0ZbLfVsEut8tx2HWOnTOy5
hqwn8ayHffxllsuhzIRUdW7zAyQ+tIDbXFo4++aDeuWtkj2SpZeW7QWcwDoTXtVYZKUQe9Sn
My+jue38UJ+fgnEsAdlvxW3ibO6X9KMRec2r3L0wqsJAernNmOXGST3cZr0UW7YNtGBuKd8T
RCbEBVzxQIURcpXqitf5PYlL2sWOVOnc2ld6kcwsCf8Ngl/94PlvELhwFjinogFJJzMZO2dM
UxH2jKfV4jbu5QVwSt8hoGAjf0/G85caBjRShVEVBmLCeBedTFuzDYWifPCxuCLwrmndB1Xl
FaPCTkMJD2M8MaET/1OM5IeD2FS1x6M+CcKJTlJWaFIxJZ2gpBM3Ds0s23N7zS5t8ZLnKx7G
6wPF5w0kzWkuwTbc5tqSfdJ7VRgVkxpJN693pgmbIfZnkHwqa6JC8LyX7HNKpXuv/NwjoniD
DXEBVxxQbozEnfZPMaFzviojLCyLnLas1fqRzHKYML49Fa8GzWruksRSJkWaWR7AbdqSHD/o
ZpJB6wVXme+2ONTy+ndyuzDvktk+WIVRFQZiwu34JNO6FELdvTTbJS/6KYuKyqtG3kPOq071
h6TZEJg8UZnbxBmi4gipYSq3HrWOJJvrIKt9gUrKghI3rcW89n09t2i0UDYdJuX1gcnV1lSU
co0kOS3Jgtt8y97IBqgwqlL91pNR6Eyc5QK3y46y3qU92XD8i02uN5PxZ2lImrZibucMuKRt
6TqpuS2jYaStS61ncQYje9XKIEnpiCYoCaqYIoGxQdzeEuOCU77XpLG7Jbczly7FbSqtBQNu
JyeZ1mxLgTTYLr9ypp4yitmQnBAa0TmsL+j8MJMLkfvkOj+1lcLXM0vMbdn93aN20ZokVtEE
pZjuYN1IbnNrnbYvKx3T2HWNJR9ET/8+bpe8X47bDd28FoXNOlcNTGvRuwK/fL4rULzPlOOU
T0sxKerpTUEiREtsRNq2n/HJzMcto8+ZoeTttyF+/2lChNzK+MlDvMRvPZkVKw/+5ti6OV9j
mgY392N86dokSd9UJHFLN69F8Wui9CzXuqnQddguD1Q7ZR4eCqcEITmdR8GCzhul8FISanid
MpNCOQekHH0Sh6zaio0U2Jb8RCjndhBTNkUyW+B2SX3crhVPS0QDVeJ2UzevRf77T+aSHbeX
6iKO2pdaalfaTgdXPFe1Ina6YrSD22GaGbj51yk7ksxKbsW2ntv5Vh61hbytP32v2yE2kfV+
2Zge4HZefdwutbkSt4k/Xeu2dc8ukcy6z6/5oh82NBW2ywNVITSzt2ZPmjkVc5vKz8heLnnK
7qcK6eUH2Izt/W5RTwcVwnqE2K5Y2qwV2wnrkuW2IICMKfcAt/Pq/rfSsroStzu7ZblNmVVs
xW1SYrsmnS0eDypoaJ2acDsg29dTl9L1zM8oxIbdjG0Ntx9ebPlr4imoRiysyyQj1Ew7cLsm
cNugW26N5LDKr/lPO7rwrLGtSxD5bKueLpoRO11R0Mft+J10yl//usyFx4bdjm0Vt8PwmABU
U1DFq4LbRg9KhnJb9K7AL37A/hsEEoHxvg+RGb5rrsgrHocwPhPLthLj9pSLXBmeOeJ1CcpN
gnJyVBUsZnz5oX/0UxNTY8EcsaaYme1A/G5OkjcP4n5bWnw5kk0B1aZKOkPJ2IUB8JbcA3vz
vM7jNgmLijXsSx7SCG5Ha4W5EvUtRK4LjxRwVJhUuk9DUE6NqoLpZXWCBZ3G3YNtHbfjPTiz
Kf9mRIrNWhVJZyjxt86WWmu/Cab5qfZ5zUhV9YzO47YsFfldrBIPL5eu2sism17MTarU2Bzb
qmrK5j8L9H6fGxomWNAJpbqwvReZKG3cKoixLaaNJbdtvsUEt2uanNtxHJl6FYY0O7c1It3Q
5UalbfN01nFbNYiJuB0HrhhyxpoLD6rOa9iWpnZNaum6wAyD6ZrlkqHXfxt6DxC47bsQcZtZ
G5kylViTNTTpNlRDsK1ZZ7QnX3GJkSq783K7E9tablfA/WwjnE4zbqeGGkvUu/E09B4gcNt3
UY88rIRCoYqivQ+3x2BbM9RS6lXTUm0lelfg5+m7AmsBzrD4gzqmTsTvI1IUfnXhyMrJjPGp
v8acgPE1XYjxtJQkCfc+jB+EePlQvclQXmx2uVp+dRL3GSWmNl2heUVqbkt+UJVzu/Y2pigi
s4cq4HZNk3Pba1Wktize23B7FLZboMG1V8yKroBppgW9T0E/thu4LfhiSIbNWiv5FKV3gLYy
XTtNMc2fArd9F8Ka2pqXVQ/pLtwehm1xfVI57ZXLcVN5fFNxewvdANv7S1YaQ9VVYLIuFFPE
crtkO2sm+O/ZSu9HFhZ7+l+B2+7BVaiLT9aN3YTb47Ct+nWMUtbls3JxbruH0dubTdyu/t7D
0dym2FQb8ebi9vrPF1vq2twWPyjJV6cG3Pfg9kBsq35VuhRGtcEm3VBorgX9FQaZTEgbtx+V
W2TCUVZUDl7JbYMHJd57OOq+9qIBC25CboveFfhZ8K5AbRTCu/ZnK48YzCD2qwJbcWeJ5mK8
9IbWJBkTBFtv8Z1XN5QJGW+D+MdmwHRuhYusbkTaNvEnrKjYilutabsO0Vsw/iURt+tOQmaX
vzKrWbsDt4diWzhWb046migc+mbXXvJOw+TXZq+tMdw2saZhTILppjvHbNye8DvM77/nTh/A
bc1DldrmTbh4bsBtGott2VgFuKLqnO3t6g695m6NQN5pmMQ3J4G2LNjOLhkY03K7/1tM7z0c
Zc9Rmo7bZ/6dQS0k8q0liLgDt0djW7SxEDFZwPbVliK8ubj9EA1RaMrtNl2hnVJkYEs1R0lV
KO/MLyObMWXPYaLJuH3efptEFe9BotRWtH4uz+3h2BbVk2ibKWqk/gF0Mm6TYIRCDeK2hVSM
STHdkKAJuW2sbm6ft98mSc0Lsb2Cu2zs6twej23R7mifkVJLcauauzC8rZui1zDZYXv/d3/E
GRG9K/DT9n+DoEk6HiXJayhv750dXcfL6MKMfwiI5RG+Eg8JGl2c8QcgXjJY4a5b1uzSjDdE
fAPjD5Oe2y7u7vi2WRtus6XreBldmdtVDvkb82o4gjV0bW6v2RjrpT5Y6ZxI2mnX9Ppod4oF
La1MmTHPqo1FM+kYQ0mN6osW3K7p1H8Ps1L4KmxL3mW5NLePwXZ9kcn20cKG2vKdiduK0hRo
szJHtflSThLLbafy6L0/qep3HV2a21Ss/MWXwGF9EV2a28dgW/jKkAhYgpbaEU3EbZKmQak5
qs2XkjEUj4DUdQtu1zQFt7mGSyhBNHRrbh+E7eqTi33OLN5R0aaW9n6abgOkyINOU1RboAZu
dz4oAbdrOpXbeXB7q0K+qakuonO5LXpX4CcG7wochfhqZjTTV21bu6GkHXbLmm72ehWzU4+g
qsszPkW6Oklr49OneZiuzfhgB86f/bwgJFa6KUi9OYEdo26WOg7blWR7N9+6qWrj5uo9e0Gv
2G77sx5FTVBtkbSzlOSkujBjrb3PnuZxuji3vZWdlfhnsvty+0BsV+aNvc+WTC0r4XLWmoI8
eUHTPijzeTm/2mK1cLv7de+1X0OvK+ji3I631qncQ/5z1l25fSS2y8mukjhUjfIX5TZ5YwK3
UyXlIV3AjKGGXlfQ1bldA7fbGgltVa47gRmjbmZSgNLIXdZVDcSRKphvXc4nL2gf2/YPSs6u
tlRqxqQ5aby7gds5nc7tMrjd3kZoqnLdSUKy6Walg7FdzGKZw9r2F+V2eOMCt1MlJdRYwE3T
LHpX4EcH/12BHl2f8SXI+7YE8dQq6ZKMp4MRX5o4SqembivfQW6H6dnW0UDReNoHkTXvLO31
q43xLjbh+LYVO/pOl9ANuJ0FtwubyAy58vXSZeNuNjoc26U1xs5NUcUel+R2fBtqRFLJvqU5
A+kZQ8nMtk01uJ3TDNzOgDtuIXPpyn5Kl427meh4bBeSTfzklFTq0kG88xZ0MhhwmxHLbaf2
DG7nNAW3uVcH0wb1gGour8ftM7Cd5/Y+O/KACn06ave0Bd28p9B4cIbmDNQwT8l6paYsgds5
zcHthNzcZUFAd+P2KdjOJru0dy4ay3TqAN5ZC5obCbjNdzHIErid0yzcfuw7M9axbNrpXn/3
hDhMHOPWHedG9K7Ar75vflfgpMXPVrNxam/B+HRtN2UJjM9pIsZXrbleIxdj/EmIH/A7Kqx6
pvScBZ3ZhIDbfB8Xn2ihv7bLRfRG3HbdRi7G7bOw3fzrznovHX0tQ5GJMj872k7SPbht8y0m
uJ3TVbj9sDB2LW6fhu1jHqo0bcBWnZGXHLaN03UjbrvYiuPbloyoHV9Db8NtMrBxKW6fh+1j
HpR00e6ExGSxDW7nOrngTENRgds5XYbbFroSt8/E9iEPSrpGd3xm8tg2vs3dhNsmD0rmQ4iV
TuC26F2BX6reFQDje3Qq4o94qNL1SOX4xV9CPBjPyeKhynwIsRL25gpdh9tLCRMH+R/roe/W
cHRtUfE+anqbuwu30xuzvqjmQ4iVwG2FLsPts7F9wEOVvjvDwbVVxrbtbe4u3LZ4qDIfQqwE
bit0FW6fju3xD0r6HpMcvaBrT63A7Uw3F59Q/4pfg+MrCNxW6CLcLj5LPUijH5R0DvDY2qph
2/Q2d/bMp+rgdueDkvkQYiVwW6FrcHsGbA9/UNJ5Xzi0tqrYHsNt0bsCv2j/uwJD1LrqkwSr
UzofbqwExit0CcZPgfjeZx4S866j/5G1VUe86Y8y5899rNaVzD5UcXxbXvMhxErgtkJX4PYc
2B69Oe+1fmBtSbBtWewzTH6o5sFxD1W0Bpoczy9wW6ELcHsWbI/9FrN7N39cbS2iCTHM1hSz
H6iL2y60pDbQ5Hh+gdsKzc9tEu3uDotklPHuW9NhKZJh2/JByY24nd7NHNsuqylWwhCB2wpN
z+15sD32QUn3GI/KkRTb4Dar6/xYdbTAbYXGclv0rsDPzd4VmAjxIzfn/aYPSpL8CZfdQ5W7
Md51eJ5lLdgLjFdo9r35TNgeuTnvt3xMluTYBrezPS/zGmlVlqsT3FZocm7Phe1xG24Dw4ek
SYFtw4cqd+L2ya//r48o/YQunvYG+6lSLIYLFNxWaG5uT4btcRtuA7tH5EmFbbtyvxW3O38M
6c0pMUtqZ/XqIpQrWTJbouC2QlNzezpsj9pwW5g9IFE6bNs9KLkdt8/88zac/2hiE3Bz6aew
RV9Qq8Ge/uD2sG5qJxpMHCEaE5CF1fG1RdolanWTm6wIHn0reQC3Re8K/KzhXQEu82ERBMjP
LVi/cEyKAoxXaGLGT4j4V1DWRk12/MNrS414MD7b1zV77k8p5bjtvBbxp6RLtDgNZgjcVmhe
bk+J7TGbcxObw2tL/8NzH6ECzxZmDNW1krtuZ0dwOy5IZiEmMO+vPnBboWm5HfysNpEGbLhN
ttvDua3HNrjNq6uuTX4yS7xHUxtFSOnMp4vzdDqC28O6yTUrtkdsuG0sDq6tBmybPSiZrxC6
VnLX7ewMbqdFz5Bc+wdcEoHbCk3K7WmxPWDDbWRwbG01Ydtqwz1fJfSt5J4JN5hmSrIZcznd
TEchc8XQO0fgtkJzcntibJtsuEXvCvw0fVfAarM/tA7bEA/G8+qZcRPGs+8XusBJGGDUgK3Z
3s05GK/QlIyfGfHsNzrd5mzsGFjJ2m4btNmPHXrXQ9W3kqkjLRYJ5bkdOokyHlYpP4DOSQK3
FZqR29S4uztIZBqc1XZ7JLebsQ1u85qN29wjExe0CMuUXwHkklMagdsKTcjtybFt+zWm3U1g
XMbasW30oOR23O5Ii8U0Jw/D69wOmuQWQP9v9vf0B7eHdZPanhrbpl9jNhORs2RhJhW1Yxvc
zndv7D+M267w+RGGnAu/b5bAbYXm4/b82DbcJNtZGsbtHmwbPSi5Hbc70mLD7fh1PyG33X6Z
i4J6o7LmtuhdgZ/s7wqA8f3dZJZnR7zdjprstuajGN+H+GRz3oSB+zG+/WcWk2nmGB854X9h
Pn+5X9ibKzQbty+BbTPeGmJ7ELc7sZ0AqinG+3G7fXNuxG0XB6PgdrKVtxG4rdBk3L4Gtq2e
hZgOdkjaerEdA6rtfeCbcts1duxy/CVq4PZOa3D7fM3F7aUbE0fJArlWu/anRtQW9d9Hwe2s
AdfScRS3yyceCbf7g0iDArfFmorb18G2BXPJ9meLAbVlgO0IUDNVW4/6V3JrXm2mOTCS7p/L
3B70IzG4rdBM3O7/ofxA9YPbFtsjuG2A7bBUqJIx0bsCPyr+GwTzFZAN411bvz7Hm/dQLr6c
BLfVDRh/viZi/KUQv5a+O60/Y8/M1mbRYIX6Jiaqtj71r2RqTK3NNK8/de2KnYDbu8Dtgi6G
7d5HIuajNa8tG2z7D1VonmrrlMFKBreZmHr6g9vDuhV0NWx3gtsIiqFFQ2t2EYLbeRNO382M
24HJKJIit2nQOgW3FZplJV0P211ks8e2NbftItzNtM7wfIVhxO0GG0bT7FlhOMxO1NoO3J5A
k6wkGgCy8WoOehlwlzLfvVtFuKWoecHfktuND0rMuO3WQ3C7pttxW/SuwK++K70roNY1Ed9M
whGIt2W8ZYS0Gmo2eU/GU9OwjKaZIsYnTsD4XbdjvJGuiu0tcKfqNQTbptwm0whflton+Z7c
btucm3HbfyEI3C4K3M5auyS2m8Ddxvq6DBNoi+0Xnzpuzjfmtmvo1O34accPA9wuCdzOGbso
tr2Xr4Z1kMrOpDG2Xw8EOsZ9U27TFNzmMAxuBwK3M7Yui22Pw07UfG1tP1wzm9bYfvKpZ+A3
5XbTgxKrad4ecIPbVYHbvKkLY9v/dQfbtlrZLWhjbEe/gd3W3zIcA9lx20kait4V+GXyrsAY
xkcXwfhAYDxr6dKI98HtpA1HDNfIKg2IEIzPW9GaMbyVbwbB7bLAbc7QoDI4Th6PXaGZrFWz
bGprBLbD39Zu6D9fgRit5BO5/QC3xQK3GTuXx/Yj3FDyLXx0uVEx9BsZgm1JfmrdnXFEnTJa
yaS3Ysht9wohzS64HQjcjkT3wHb0JCCZYypetQvBxIh9iN3Dn69EzLjttF3MZodaud38ZxCq
AYHbYp3K7dtgm/nDbS5zflgBWJg+ANstsz1fjVitZKfuYcjt5fWf1CI7T1tpgNvn60xu3wjb
j3DLLXpX4BfPdwUSsPcQTh6rgQl7xBtkYL6COm/V2znegd3A+AGjB+MVOpHx90I8tw1PNdB9
v/URMZrcuearEnDbKAhP4LZC53H7bth+1Mk91Hm3ffsg2SS4JjsNvUbqDtym/IPtMrcJ3D5d
p3F7ZVyfldlUIvdg170e2rHKK5eKBgfg9i5jbpOO2+7ZMRNE0kUZD7gt1lncvie2H1lcueGO
O5NpH6ddJsDtXZbcXjTc3luC2+frJG7fFtufSoDljvDal00aECm4PUCGjj8t8auwzO3cyyfE
nFOoIaeidwV+zvwbBGD8sG5+/9si/qUD8b76a+88AvGZzXmDDzB+lynjnYLxXstpGB8I3B7W
zet+d2wfrp58DsF2Dtx6O+D2LkPH9OK245yUuE38hBg8Zu3pD24P67b3Brat1ZHQQdjOPFVp
MmMfW5duwu2FxNz2WxI/jeD2cTqD28D2CLVndBi2+Q233gy4vcvScSu3H+D22TqB28D2EDWn
lAZOCAduvRVwe5cttzMTwnA7aMnSvuGPuET9wW2xjuf2Mmx3995qra2R2I6flIjeFfiZ93cF
mhw681F06R6MJznjw008gfEn63DGA/GD1FhbYxHPbc71Ruarl7fjdrRouW4WvyrS0x/cHtbt
lr81P4kaa2sstm3+KON8BXMnbjvWSXiaopljNtwEbh+og7kNbA9TW22Nxjbz/kmTCWceV5fu
we14Fx2cd6WGDLe7AwO3FTqW28D2OLUScTC20w233sR8JXMnbmfOO+9zvN3mHpSA20fqUG4D
2wPVUlsHYDsFt1NbmK9mbsJtEnI7nbdkw92fEXBbofKoRO8K/JT5uwJyFxkB8SPVUIeHID55
quJaDOg7DdV7MZ6btgjyOUvKYHr6g/Fjuq17tAZ3UF36zDZzVKloc673B27vsnXMZ5aCaSJ+
2YbnDFY2uK3QcdwGtsdKndqjsB2DW+8Q3N51GLf9P0DIOQ122BZLG9xW6DhuA9tjpc1tsDgH
C9w2k61jyj4micT3fc2LzZYM3FboMG4D24OlTO6R2A433HqX4PauA7gtovYjmVUCt4/TUdwG
tkdLl91DsR0ucb3P23Nb9K7ATyrvCqQazfgA3LX1HTYC44/TQYwH4odLld6DER/s9/ROb894
hYwd9ybWX9fUZwrcVugYbgPb46XJ7+HYDrZx6s7g9q77LiNwW6FDuA1sHyBFgumECSFw20T3
XUfgtkJHcLv552NIIXltnYHt+FmotquzD6hH4La9wG2FDuA2sH2I5LV1zo8/BG5baD6EWAnc
Vmg8t49/ljpeoncFfqR+V+AwievwrCdcBMYbaD7cWAmMV2g44++I+Cklra3zvpgAtw00H0Ks
BG4rNJrbwPZREtbWedhufwY/XwGB2/YCtxUazG1g+zDJautEbBf+ba6K5qsgcNte4LZCY7kN
bB8nUW2diu3VvWvopu4zVuC2vcBthYZyu/kHY0gvSZ6Xk++jBG736r7Licmp6F2BX33o3xXg
GU8GsHozxgPxR0qQ6LMRH/91aanA+F33XU9j9uYWFf9m3Aa2j1Q90zM84QK3O3XfBTWE261f
vyRG+iyYayC3ge1DVU31DNjm/uHyuk6POhG4ba8h3Db5EfOtuA1sH6tarqfA9lcY6hAmCDsS
uG2vEdxeH9X25eyduA1sH6xKsifB9mec6himiDsQuG2vEdxesd1XP2/EbWD7aJWzfQy2Re8K
/FL+rgCB8T267wIcwPhta95n+X0Yb/IICtKoWFtkUL1WIqftMV8lgdv2GsDtHdtdBfQ23Aa2
j1eptmbC9kP/b2rNV0rgtr3sue1tt7tMvwu3ge0TVKqtqbCt13y1BG7by57bLwxRL43ehNvH
PHeFQhVq6+LYBrc9XXkeyzLnNq1l31v+78FtYPsU5Wvr6tgGtz1deiKLMuf2xqHeDfd03Ba9
K/CL9V0Be8YD8ecoW4eXRzwY7+naM1mSNeNpr/tOJE3H+AHcBrZPUq62ro9tcNvTxaeyIGtu
eyCivjXwBtwGts9SpraWG0zIfPGD2/Yy5nbA6r5FcH9u0w12dxcVn/U7YBvc9nTfxdXN7e+/
9z8Ghd+34b49t4Ht88Sm/RbYBrc93Xd12XI7InXXOrg9t4Ht88Tl/SZPreYbgnIli94V+HnD
v0FQ1n2Xoi3jo1XStTm/O+OB+BPFJP4miL8+4w113/Vlyu2E0z1L4ebcBrbPVJr5u2Ab3PZ0
3wVmyu2k9Hs23PfmNrB9qpLU3wbb4Lan+66wbm57754wlO5YDbfmNrB9ruLc3wfb4Lan+y4x
y/02U/sdG+47c3u5Dyauqai26Eb30fnqCty2l+F+m2V0O6BuzO17YVv0rsDPzN8VOExhHd4J
8WC8p7vMaSrDvTkLrvbN+X0Zfy/EX1Jhbd0J2+C2p9tMaiK7vXmG0M2Mui23b/Tc9bIKautW
2Aa3Pd1nVmPZcTtDo+YN9125DWxPIL+27oVtcNvTjaY1khm3s3xuxdRNuQ1szyCvtm6GbXDb
053mNZQZt7M4at1w35PbwPYU2mvrbtgGtz3damJF7wr8lHlXoJvxr+8wCyRvpNotGQ/Ez6Gt
tpbbTch8owHj7WW1Ny+Uf+Pm/I7cptvtBC+qdQ7uh21w29N9l5rRfrvI5ra1cUNuA9uzaPH/
WajZONen+cYDbtvLaL9drP+2DfcNuQ1sz6LnLNzyqdV8AwK37WXD7QqZm5bH/bgNbE+jr2m4
JbbBbU/3XW023K4sgKYN9+24DWzPo895GI1t0bsCPzn17wqA8bvuuzRNGF9leMtquhvjgfiJ
9G0i7rkzB7d93Xe9mXC7ugJaNuc34zawPZOWVe7sSMw136DAbXtZcFtA5YZFci9u3xYT19TG
7bMDsdd8VQZu28uC2wIkNWy4b8VtYHsu3Rfb4Lane87wpwy4LWKynls35HZLZ2iE7ottcNvT
Taf4YcJtEZP0G25aDpboXYEfPd8VEBmspIRVT19oiJ4TcnYUQzRkHXXrtFyc43i4qHNoP/z+
e9nEqKePTqmvmlxDjjq6QmP0NSFnBzFG562NkpALe/VkZn2m4moNZa3iDtNJM4JV7T2hQfqc
kLNjGKQzV0deyIW9ejLz+XdPZDa0nujUnOTkGnLU3BEapeW22J6UVciFvXoy83pn0NVbyloF
7SeUaggvfXVs6AcN043voycvkIyQC3v1ZOb1OzqyJKos09lpYeUacvTZr6EbNE73xfakrPIC
/Pf/4PNdgf/5j/h3BT7fE/jUwX9X4OwMjVVPZp6/P+8kTWWt9uZnp4WVbgxPLUD8bHJnBzBO
Z68QXsiFvXoy8+S2qKms1Q0FbEPQGTqbrGPVk5n935+HcgK2IQiaSZ+/z/Px8fFHvv3v977p
z3777z/27X9/4Nv//tl/5p/7Mz/49l//+j/1Ov589vWXX/9b9XsvfV77f/wv/86f/q//63/n
T//DX//4+A++e7b/57/979e89r96XfuLz1+1+fhT3/632v+jHx9/+4++YvnUD1/Hn/1/8N0f
+Ph93/77h7//vPJ59Ee+//Mf/+J3n9f+y9/9iY9/4tt//9H3P3g9n/s/f7X67vvvl5/+T3/2
r/32735k9dn/T33r9Oz/n/ze8+zf/TLza3/6g/7y7/zub//sx3/ht/+NH/+lv/G7f+2vZ/p/
9/Xf77/99zOyP/jp/fvPLP6TX+f/6W/Wvg3744//2mfEn73Ca5///fVvI1n/+x/9/d//8d/4
wz/++Acff/X7f/UPf7b/cx9/5avfn/z2v88zf/X7z+z+WhzMl91V3ybl4zd/8zfP+oun0E1E
ZttFCIJEwk9WUI/I+Cd9CILqArehdnHUBrmhG+qzrF18kl61Hl5ZW1JuHdBmyrNJS2Kl8L4M
uA21KkftYsFB0CzyNxq546co+uz3d9G7hdsC8PHsGwyPnOfBbUZih/tae7Y5m9vlzRqpL0CH
iZk6T+7s8N5AlMn957XsZGDpePKTkB67tRmx+drP+Vdo60ueCa/33sD/Pc/QPOMw/Hw2t9ni
c95l7lz5AnSEmGnLTyI0Smzqn5co/Mh0csfGOqHIS0PueP9EQcpoT6Of5j3rGYN7N9rnh4IZ
YR0GU3Y+t2tfbWVLDLV3ouJJy52DBotZPMHqZ6cBS+elBK3rhSA/2wdKnoc8M+zlc1sEAZY5
bgf/jvrareAwmMwJuP1IQg6KjXLFl70ADVcezwD3saIQwT6I8n8mD0tnVcxq7tgDenz2uSl2
L3pvp93Xr2U+D19/UCAk+HM3Ti967z489vMO1w/TcHv7FBUiuD2hdjS79CIB3AcqWQXgtkYS
bntZpPCsv8V2UeNvxGYNbnfWrduyd3tCnndI/mTOwO1gfGlR5Yqv8qYMNEwlassaQGZK0rwv
nmhhlTq9qwTcjvDrvLP+M4K4Iy0BaLfzS3jknn8qZj3p7b0jh9NzO34lBtyeTBuV802o3gSy
UbIKCNyWS8ht553fz3JPxhe2RcRt9+AO16a8w/m5HT04AbfnkmwvDXAfpHQqwG25BNwOckXB
t4tpax+ueW4/ksaxtdThBbid3qlc3Kd4ARqodStt1Q7qU7oKiH1DotLpTSXk9tY+4LZLW/tw
jffNGm6nDsFtqENyHAPch4hZBeC2WHVuh0mkxXvn1fGt3SM9VnCbd3gFbqc/hDiuH4rveL1g
7KzbQq0Ct3sk47YLOqxnw0e5aesObqcOwW2oQyoUA9wHiMnw65VhcLuuOrejVI3nNu/wEtwO
zoDb80gJ4he4BwYEcdxmf8SvdHpPybgddnCPeFOs4TZJuJ06vA633esDuD2NSLt/BriHi5sR
cFuqVm6HCdRy2yUNwG1onPQUVpMeUgrc7lGV23EOu7m9g5jndsYhuA21qmXzTNhwjxXL7ecJ
cLuqFm4vj3hTrOI2cY2L3E426uA2JFcbgltgD8nFrYLXF5PgdlUibru0Qwe32R00byEfCbgN
SbW0JbyxGyRTIbvgdlVncJsY2+A2NEht2208KRkscLtHZ3B723DfjtvBFg3cnkPN+CVM1ECB
2z06hdvMy4Q34rb/wXH9wgtsE8hMS3YeZF1to4FWGXA70/0ddA63X+C+G7cJ3J5O4Zw09HWm
4UCrwO0encTtJ7hvyW23fgK3Z1DXnhkb7nECt3t0Fre/Pt+N2wu4PZs6t8zYcA8TuN0jLbfX
lFIvt1/vx1a5TXwkM3Kbwu2ZjNvENoGM1LljzhME6lQ/t9956VS5/VgGcTv8VWLv8mW5HW63
we0J1LndxoZ7nMDtHrVw2z1MuB3MQpHbLjU3IbeXJf3suH7BBVBhpDq329hwj1M/t9956ZzB
7eAXcBxz+ZLcXqLt9qvGKD4dFh+9c/GNV/92GRvuQapzO94IPbB0NtW5TQyMHhFdVdzeDfLc
zjicm9tLgu311JKUn9eQAIWRMtgtY8M9SDVub3J8p/deOiJuczvrdm6zjUNuZ7fy24VpuJ2D
c8zt5IEKV5aQrSzyizkaIzG3410cls6jg9sEbifcDi/vpRVdRfEdJEon5SQjUKIqt/cjF3TC
0nlIuP3wy3YvYp+uXmkbcDvjMHw3YEpuZ5/FhVWG4jtINukFt4eoxm3vEFueRN7wKT7em2zN
Q9L6ZwdyO46Plom47bzj9LdwgqvMhfcuvsGieEbazbh+M1AoGbeZLY/bDjPd30EeUCg6do/t
2PnN99OPh9eT7djE7bzDxS1f59w83N4+JTsA//MSf9iP/S6QpYyAa4R/KJSQ29ktz3svnc9E
vN5fX7zjCLnrYZRQ5xlRvU/iEdzFl0sOv3H7+WbdhNxO3hVeolQEWwi3tXIPaIyseFsgDNQs
IbfzW553XjrPDO3fnjnyjr1GXvPtdAiiVm4nl7MOX/E9m07IbYoqcYmHD24fKrN9stG+HQok
5XawrLB0PrW8cPIF69d9bdmOt2bE74q30/5mUsDt7ckUheeKDsnRGt+s3I433PG9LxjUfsE9
oCGy2yZb3QAgT1Ju57c8b7t06AXB/Wta/yWJvd36Id1QBlbiJsmG03PLtS06XLb7yrTcpmQQ
4PaJsqNtsAGBbARudyiG9WM/dmGzR7KffPGXPp86q7j92nBvs7PfKnwzscMX+Whybrvto4zb
7/zHKIfKELbxREMG6uf2Oy+dxSNk8FsiQZ3uZE06f53crsR44rm9m3Phx60N5/C1EJ/drsZt
v/pQfEfIkNt4UDJAYm5jy8Np2Z9ZBI+rXdBq5WjaeVkfXuyt3CM6Xpsm5hJKR6//JPcJt+7y
Z+R29AMJuH2qLFlreQ+AngK3+0Tbo2S3nuIyyqfZ2wNX3ERNlnRqlrRD7PDrxNe3qPfhNjRE
pqgFt+1lwG2oU3puM1dVuyNwGyrKFrWWm3foS+D2+ermdoLAmsBtqChb0mLDbS5w+3x1c1u9
zMBtqCjbHIPb5gK3z1c/twnchgxlDVo8KLEWuH2++rn9ALchQ1lzVruvgGoCt8+XAbfp3twu
Ft8b/+LXKI3gtrM0+PYSc9tfVVg6pjLg9uP63KawqsDt82SPWXDbWOD2+QK3t89u+yjnNohg
rSHcxoMSS9lwG0unRxbcpstzO3xMkv55FhTfYbKnLB5wG0vK7WA3hKVjKnB7/QhuTyH7pxp4
wG0scPt8WXD7cQtuu/2z/7FYfITis9YAyILbtpJye4k/uKBlxgQkEbj9SH9XP0Z1tvgABGuN
2BzjAbethNwOd0NYOqYy4TZpPM7H7SWtqe1zsfgIPLDWiIfReMBtKyG3l2SRuaDhqPDeQibc
VmkGbieb6NzbJRRcY56njI703TRibwxum4ri9eLJuxTuhrB0TEX1dSJootI03H4OihJse3/G
nIrFh5+/7TXgMQm+mLRVldtLeLR3ckG7oUHeWkvyZLeliVITcPvFak/B5eiay11A8dlrCGLB
bUvFq8JTvLDiTlg6JmL2mg1NlDqf2zpsZy+g+OxFQ1IKbhsq3c5sihaWSzth6dhIkMC7cTup
H+dfjZmevYDiG6FmbhdnY8zd4B0VrgIXXMsuKywdewkSeDNuQxMrrrXMko/rMUMS38qggCHo
FAlKGtyGDhKD3jq3KXvFazAoYAg6R4LfUtf9IntF4DaUFbdl5rjtN6LtRBbc2Z04BEEigdtQ
VhxgKSQ1xdz2YE0ZcIPbENQncBvKiX2gQfE2ekleVQjaetf4HhAEaQVuQznxD6KTLxwLpObB
jQfcENQncBvKSchtiv7uRdxYaBeCIKnAbSgn/vF0+oJf+CdjgmvshhvchqA+gdtQTtmn09Hp
/Y83p6Tn2A9uQ1CfwG0oJym3t38shdldsxtufDEJQV0Ct6Gc1NxmLuXeAWcMQxAkFLgN5STm
Nj0/s+9rZ84xhiEIEgrchjLKPIbmuO398XTOStQc3IagPoHbUEZybr/+SVPuCgtzcBuCugRu
QxnZcJt7UIIXSiCoS+A2lJGG2+6R/XMk7HMVcBuCOgRuQxkpuP31xSS4DUEHCdyGMlJwe7vA
dGBwDm5DUJfAbSijDJ+L3GYugNsQZC1wG8oI3IagSQVuQxkpuU0lbkfnwW0I6hG4DWU0ltuc
CQiCRAK3oYyMuM3+QRNwG4KaRF8/q4LbUEYt3M7YAbchyELrygG3oYyU3M68BsheALchSC/a
1g24DWUEbkPQTPKWDbgNZQRuQ9A8In/VgNtQRuA2BE2j8PsjcBvKCNyGoFkUfe0PbkMZgdsQ
NIuiZQduQxmB2xA0ieJFBG5DGYHbEDSHlnjVgdtQRuA2BE0hStYQuA1lBG5D0Ax6YhvchiQC
tyFoBi3JYxJwG8oJ3IagCcRst8FtKCclt6nEbZec4kxAEJRoAbchuYy4TeA2BLWLmMck4DaU
Uwu3mQvgNvQWyi0MaXMqPYCMt0TDuE1BDFT9d6noFVoUOpcMbme3nSHBP4GV8QUFGsvt3uje
ScRsuEqNXy07bo5KBr2PXpvflKWUnir1Wc+5qJVLenPOzuL2PpK10fYpDJD7ESEZsT/mF9N9
B4mzjC8olJLb+HeBByldLN5iXsLj9dN65HJNiwskXnahh3dXOhsPf5JEfdKUE2c1ZL5/fhi3
l4i/bDzOa+2V1iM+7eKO0cl9YLRe8R2EzjK+oEhpEa2nwe0D5S3cZHe2+E388249G132jvML
hFl2KTjeWAxgV+xQ7seUhc/wEu+/F2aDu/XwLpzF7fDtsC1qF5yPB/fwKszPEO3NmLKNjjO+
oFiZGkxqtnKBSTIh7WItgdx2nryP3vHekLaVU2rqe0ldst7eXpSW9JYeylR22IeWJUoyN8WP
YO8ULprDuM08kGYrxQuemMEEV9eTtDfbc+F3S0o08QUlCgtlUzZllFRzrn3GMpSKovXgggvr
hz3He3HvPf2mFDZ1noFkYxN72z69uShg13bmeZgp7bDPTinynw4sseHgY7BqRnE7qDFuofoN
aK8w9yLqGnU0GL9+lhDF7mtX/zxaq9WlzjK+oEQZumZXcECSYvuMZSgRhUuZomeIyfGKB3o9
wX5+scQ2zS0QbtnhkWKgpKS9E5TJ07LEvNtmzAXYjp5OhSa2a1Nwew+XvMi5wfhsoPCLxu3g
s2xdtix5X1AqLbf5tc3RHNyWKqKn/21/ntvu4RW3mts8Q8BtT/ESoDDBLukQ9YmR5r9qEf2Q
E7tZj4/jtss2IK84vcOggJha2zbcW7HullyuLDO+oFRN3E6ucNzG7VIoSkqUGAB7x0t45L51
yDUVcZv19vbiuO28i7U+aWo9kBdy7pkYxe2w4JgVHVeKf+yZ2PbRSa+I20n3ArdTX1AqNbeJ
u8KdBLeFWtJkB4v/ER977aPDpGnxB9Jo2YHbgeJZCT5T/ev8Je7gn9juzOnK8VbkDNzO3Nj9
uxJ52HWeCRefrJVlxhfEiMdrnttsPjPnMhYgX8TkelvWWW57nV2haZnb62mXdINYbm8f6tym
6Ha8+Cl/PLgJ3k+9uh3H7SiGqFKc33Rr4A3Gxb3224+W26kviJMFtwncbhezbPYN9yBus8sO
SyVQtATCGic+Uwm3o/4e1hxjNbY9iNthKHGg6zkvwLUp8xXL61PU69U2Plkpy4wviJOa25Re
Yk6B21KxqV433CO5vTlld/dvL4bbLrha7hPjcAk/e9z2rEbnZuH2dj4oQX9wUa9XE/fQczv1
BXFSc5tJKJdiQtpFIj7VY7nNLjsslUDRvKQfy32ieQ1ZmbO6n/w6OJDbLmnh9qtpZHE2ol6v
Ju4Bbo+SntvJHoHbNIDbQjG7nU+99mMDub2efYDbrBhuh1fdI1GN23F7YjM+mtvL4gezVLnt
gp7hwau9y7fVcZvxBXHi+VridpJRNsPgtkyZTFO6PrZjL7Ud3PadMSbeXrbcZuD4yHF7m6eB
3HYBt12W2+kowuuv9i49u1ZpdIuIHXjHvC+IVQO3o1mLJ7FkF4pEuUw/z2W57R7xoYLb/LLD
UgkUTkxMWCW3vz7x72GlZs7gdhialtvPauW57YEA3LYTy1diqyzTJ1vCzFkoEr/j2sTD2Jrb
D8bE26vK7cp2h+O2K7Tftfkaw20KSB1+8pq4LcIw3vU6b9gFn9ZOLuxe4HbqC+LFlU6F2xlG
VM1CiZoSTVz9K7ld8/b2SrntoqvlPkH/haNj9oetA7j97f9d8Clp4oJQwsCk3HZhY3DbUFzp
8LuDqMHXZcqlF9wWqe0GuSUX3B4mS26/9kEULYnc4lm7HsltFzdxWyhhYOt13rBjPjHGwO1u
MYBdFhG4V3HX4zqHeAnSzBxv6wbcHqZebseZ//wwBbfDewh7R7Hl9tYa3DZUnB/ykVz+cjKP
bXwtKRMVc5x/IOUT2JWagtutsuB28K6d+/xv0jzH7c/z47i9x8LeUQTcDtrHvaJPa72B24Zq
JizlqQ1uC9XK7RXczdxmfWKpeOrldjQJX8fRtnYmbid7N7ddDru+rrvUcJbbKw3AbUONISyy
LlIzt1/gBreHqZvbFEzCC00ubs4lnFZuf/99U+hFrcHsTzzGc/uVC3DbUHFF2miI0fupndvP
DIPbw2TCbbedXjOfd7Fr4/aI/fZqnLYf2NKfBMy5/fwEbltqBGLH3Azup9yOy7/OHa+fwe1h
KnKb+FSFfbY2+yxTYsT7nFwYwu01GBm3yYjb2/dh6UW/LMFtuUYkiJB0kXq4vb7T40pNwe1W
RVBt4Pa6CCiYpciIZzS5MIzb7rGSOqS4H4DbjsK+W4C+XNjL9xOcALftNIKx4LZMXdx+LR9X
appdIOmyw1IJVOW2eyTi+8zK7cX7FD7grnF73TKouO3f7MDtfo1gLJIuUx+3g8Wh4Da/7DBr
gQy4/VpZ/iT7+9pTuL07PYrb+5DBbUtlarBLA0zeUo3c9jAAbg9SymCXvZg7vbze1ZiN26/g
/BCI53a4kr2+4UkX9QrbLvGpfFky/aGM7CE74lZwS7Vxe2dIM7fXc9kt+9sr5XZ9M5iA+LNZ
iGev3+ncdt6n5BtTt8bbxu3NMlui4LaB7DNEyLlMbdxm6x/ctpUJtz97UdA4RlvQPLowgtt7
xZGI28SylPiTwf1Jz23eF5SRPWWRc6FO4ja77DBtgWKo+rmhTKZSEH+1nI3b7uXFBTdtL5KQ
24t/ekN0YDHuxe/CBdxmfEEZBfk2kbnBu+o0bjPLDtwOVOO2izswfR7rVwnO/+xbOZXbS/jD
VhiA2zsEccWtA5gHX7xUuO1X3d6A8QVlZI1Z+xvBXSXhtnse1vYtUdPaAlk9xA1aR3I7xVCl
aDMp6bOeC7m9fjiD2xQUAbElkdztg85ra5e0pcW/Xud2cjbjC8rIOkWElAsl4XZpax2dTM9m
Fgi37MDtQAlUI+CK+iSN/U+ncft1HD56pzy33dbBKzGXtKUQ1h7Cvetep+Snx4wvKCN/mix0
UsovOM0SbpP7OoxgvF93tabsAnGPR9wW3PaVQJUC4LqkA9fnsT4o8Yyw99RAJ3F7DyUIzO/g
H3snd9vuq6NH8Ijb+7nF0fa9pf+Aj/EF8TLmtvVtQKgrTjNVqvPr8jOZ0YL3rnuWkqb5BfKI
LYDbgThuu/2SrM9j5XaAI+bRVqB1pgZw24+FlvDTKxRy4Q2FfO4mzeM9wssoV63ruc3B53mJ
Lygj2xydw2065WbRKRG3v5ZIUMdrgrfuy+t62LS4QNwWgPPMYqmsSqEa80fSZ+P2EnwoG1pb
DOL26pKWIIDwEUX6VWqI+Uc6BnrVWjDGx1ate62vDjbG13xBvMg0R+dk/JSbRa9CmKZ6pjJZ
Cet8bb23Ok/BkF0gj8DC7g36EjMzz/QUiML0edJqPc9MT8bMCdzOvejyrDZa/D/Euj42iu1x
tUZL3HR1ENd1zhfEi0yhdxq3rzfPMm6vS8H55136LkjatLhAHjFoLpnCUcoxuIDtPLf5XcXx
3A7rLcftmAfbqIN4k2RQUGtM/6QpJU0zviBelkmyvQnM7rZTIm5Hz0gfPkFcuWl9gSzhqc7x
3EfczFCSsmqfF7eJ60UFbn+aGcTtwI8Pa+e3c163tXrSclkY2qc5Sop1dUBpOnlfECvLJJ2U
8Htxm/bL63+Ddhu4A1NM09oCWaIzrQO5nfiZyc1X9upKSmL6zcvtB/8PBUfxRvFvKzCThfDc
/oCPiTH1BXEyhF6uGIfrkhMt5DazFFIQE9+0uECSbZE48rurTGhxn+0Uk9vMUtkgZ8/tsGji
G7+TdM9ftd05oRglssvSafveS050dsv1+s+hY7pkBkfJmtvchpv3sdXEGG67zKdHffLB7dnU
UqV5SyaGtDrthtEjcHtWWXP7AW6rhGKUyCznpz0muehM535ULl09NpY31QBusw9KUh9bF3Nu
UxAgReESuH09WaXJbuPe5Poczx3Kbbn2q8fGcpy3yWXI7ecRSR9wD+Z21jtVxwtuTyerpJ+Y
7ss+KHHM2ed/we1jRW47DBnsXSioxu3ECJfxHafgNlST0fONM9l5WW5zW671v+D2kRrJbe4B
N1ey+zlzbi/BDC/xfIPbF5TNA44TH5NcdKrB7Yk0A7d3I0O47TKfHoIvJsHt+WSy4TbatTfq
klOd2XI9D8DtY3U0t7mU76fAbagui63yqdvtaz4oySzd7LVjI3kzUfgUwe2fXNo4FVP+VOZ2
WrLeGWtuUxAfJdFWXygBtyeUwV753O32Rec6DZq2+ge3j9Xh3E5z7p04nttMgJnYMuYrBhRC
MQqVzqNa5263LzrX7JbrdQLcPlj7TESMk/Vm6n/xJjO+9khn3/88hNuZT88zLjkKBG7PqKU3
VWdvt+/yoGQBt8/SnoCAwcK8FLlNvJEo6f5Ha26HCzxd7luEuXUEbs+o7g332dvti3KbW7qO
vXJsHO+ovX78Ys4gNxZxO5/tQUnOSPg8xjcwlNtMsOD2NdW54T59u33VyQ4L3r99gtsHK0y9
dyjpzHJ7M5mDmj/74c7HmNtheDy33RYG+9cXiokw3bZNAJPLqHPDffp2m/1rpVdQtLfzf7Q+
cDxYKi9icZJ3dtHZF5fzNra8x+vPmNtheEyw2zj5+09xXxf/a8KdofY/tH0ndSVrhmVPdqVz
qJZwyTwHcWzxYql8qofba1MnPL+JPD9+I1tuUzASZlw7eNkRUzkRlTE2xWpj7P7quWVa3m7b
ddXZjhjxlchjixdL5VPN3KZC67oJFtum3KYgOuZOQfvV3B28PApbAKAYNeq4Z86R6CmCaNG+
ktxj+/W8Y3M6xwzeUVRfVdzKG/DvucuUi7dcIIJRKoRiVIia167t3bZZtrVzqMhfuq//HFu8
WCpzaTpuFx7Sv7qxvdqEYlSoFb/twLfVhbnN6tikTjGF0KrTuJ3/zcnKLyCZrj3hLztBn2p8
UtLxgMVWc9w+7HRs8WKpzKTzuA1dTW0b52WS7fZl3wSEoETgNiRWC4JneUryuN+DEuh9BW5D
YpH+kUdDl3Ga5g4CQX0CtyG51BSmeZ6SPMBt6DYCtyGFFiW4p8I2HpRAdxG4DWmkA7cW84MF
bkM3EbgNaUQaFC9zbbfxoAS6i8BtSCU5uGk6bGPDDd1E4Dak0yLE8YTYBrehmwjchpSSgXtt
5Q6JSarZbiQQ1CRwG9JKgGSaE9vgNnQPgduQWkuNytUGZwkPSqBbCNyG9Nq4nP1nqOfEdvQv
rULQRQVuQw1asmym/KUZhAcl0B0EbkMtWkI9TxJ3ci7hQQl0MTnuJLgNNSliNKOzI2QFbkPX
Ev93z8FtqFFlaruzw8to2jsKBHHi6xXchlpV2nKfHVtWUwcHQZEyPyCC21C7rrbZfuBBCXQt
ZXZB4DbUIXbLfXZQZYHb0HWUW1LgNtQhhtvu7Jgqmv/OAkEvUW5RgdtQh+gFQXrtCi7AbTwo
gS6j7M+w4DbUIYpK6gJMBLehqyj/8BHchjp0QW7jQQl0Eb1+iuWelIDbUIfAbQgapRewidlw
g9tQh67IbTwogS6h7QEJs+EGt6EOXZHb2HBDV5C3zU7BDW5DHQK3IWiMPFinT0rAbahDl+Q2
HpRA8ytgdbLhBrehDoHbEDRC0RY7Bje4DXXoktzGgxJoekWgjp+UgNtQh8BtCBqg5Il2xHFw
G+rQNbmNByXQ3Eq/iKQQ3OA21KFrchsbbmhuMW9shygHt6EOgdsQZC7uNyRDloPbUIcuym08
KIEmFjHb7Qjm4DbUIXAbgqzFYjsEN7gNdeii3MaDEmhesU9JPuXxHNyGOnRVbsdxQ9A0ymy3
A6CD21CHrsxtd3YQEMQoi20f3OA21KGzuN3tBA9KoDmVfUryqY3pP/z++wNjgm6ms7jd7QXc
hqbUE9tLsumOzmO/DXXoNG73usGDEmhKLQJuL9hvS4SNWVbncbvTD7gNzSgScdthvy0QfqLO
6kRudzrCg5ILaLm1qiN23gUKu/7w++8G5Tx0NItcNe5UC1Z4TrScx+0+T3Hk0+i0pVEUcmGv
6oCdd4XCK+P226GjWeSqcaf67GednZuIlhO53eWKjgpVq5MWRkXIhb3S8VLYwOUv/Rjcruqr
o3V67iFazuR216TMOqmnLIuqkAt7VcfrvEsUXgK363r2tM7PLUTLqdzumZRZ5/SERSEQcmGv
6tid95HCDj/8btT7JHRuUjJy1bhTtfe8vWg5l9sdPKFJ5/T4NSERcmGv6tid95GWiNvf2ad7
czSfXDXuVB1d7y5aTuZ2O1Bo0ik9ekXIhFzYqzp2532ksMO497epGtnhWrq4PeUqP1nxJB+V
pU+3ouov25itQD81X6Gdt5LnnCEL1XNa4fbQ/fYg063q5PZs62kCnclt6gQ3zTmj80UFbtur
m9tD398eZLpVvdyebUGdrzO53QtucFsocNte/dzGcxJJN4Cb1ancXsHd6nHOByXzVRm4bS88
J1Gog9v4cpLVudzuBDe4LRO4bS/stxXq4TbAzelkbveBe84HJfMFBW7bC/tthbq4bfE7erfT
2dzuAje4LRO4bS9wW6E+bgPcqU7ndhe4p5xNcHvXjPNjI3BboU5uA9yJzud2z/OrKTfc88UE
btsL3Faol9sAd6wJuN0BbnBbJHDbXv3cxveSim4Ad6gZuN0B7hnnEtzeNeH0GAn7bYX6uU0A
d6ApuN1+N51xKsHtXRNOj5G6uY33AFXdAO5Ac3C7GdwzPiiZLyRw217YbytkwO3e39G7mSbh
djO4J5zJ+UICt+3Vv9/+zj4oztEMsuA2wO1rFm63gnvCH53mqy1w2154TqKQCbcBbk/TcLsR
3BM+KJkvInDbXnhOopANtwHuXfNwu+2LB3BbIHDbXthvK2TEbYB70zzcbgT3fA9K5isscNte
2G8rZMVt/I2pVRNxu+1uCm7XBW7bC9xWyIzbAPdLM3G7CdzzPSiZLiBwe4DwnEQhO27jFyef
morbTeCeDpPTBQRuDxD22woZchvg/tJc3G4B93STCG7vmm1u7IT9tkKW3Aa4PzUZtxvAPd2D
ktniAbdHCPtthUy5DXA/5uO2/osHcLsqcNte4LZCttwGuCfkth7cs00huL1rsqkxFLitkDG3
Ae4Jua2elNlmENzeNdnUGArcVsia2/T24J6Q21pwz/agZLJwHuD2CHVzG99LdnR7e3DPyG0t
uCebQHB711wzYynstxUy5/bb/8b7lNxWghvcrgjcthf22wrZc/vdwT0nt3XgnuxByVzRfArc
thf22woN4Pabg3tSbqueX4HbFYHb9urfb39nHxTnaAaN4PZ7g3tSbuvAPdeDkvlqCdy2F/bb
Cg3h9luDe1Zuq8A9V6XOV0rgtr3AbYXGcPud/zjgtNzW3E3nelAyVTBfArft1f+cBN9Ldnd7
X3DPy20NuKd6UDJfIYHb9urfb4Pb/d00T1NvpYm5rQD3VHMHbu+aaV5shf22QsO4/bbgnpnb
cnBP9aBkplieArftBW4rNI7b7wruqbktBje4XRS4ba/+5yTf2QfFOZpBA7n9puCem9viLx5m
mjlwe9dE02Ks/v32d/ZBcY5m0Ehuvye4J+e2FNwz1Sq4vWuiaTEW9tsKDeU2vSO4Z+e28G46
04OSiUJ5Cdy2F7it0FBuvyW4p+e2ENwTzRu4vWueWbEWuK3QWG6/I7jn57YM3BNNG7i9a55Z
sRa4rdBgbr/hb7xfgNsicE/0oGSeSFaB2/YCtxUaze33A/cVuC0BN7hdELhtL3BboeHcfjtw
X4LbkudX8zwoma98wG17gdsKjef2u4H7EtyWgHueDfc0gWwCt+3VzW38vqRtt/cC9zW4LQA3
uJ0XuG0v7LcVOoLb7/XHAS/CbcHddJoHJfPVDrhtL+y3FTqE228F7qtwuw5ucDsrcNte2G8r
dAy33+k33i/D7Sq4p3lQMkscu8DtBlG93MoGwO1NB3H7jcB9HW7XwA1uZwVuq/UqtvxcgtsK
HcXt9wH3hbhdA/csEwZu75pkStTasZ0bAbit0GHcvi+4l1SVy25QGE2dKjugzKVDNUkYnsBt
pai+AMBthY7j9n3BHdZkndtjomgzXAQ3uJ0TuK1TvERcpk3ZCri96UBur3PX4G52abjtxsXQ
2C0/KZNMF7i9a44Z0SqoskzywG2FDuT2G4FbeMk6hNZ+2bgmmS1we9ccM6IURSVG3CD6uY33
t8d0uzG416HVuD0ugmbjhchoDmLOEYUvcFsliguMmAnFfluhQ7l96994l3DbjfXf3jMH7jkm
a44ofIHbKqX3/xHcxu9Ljup2a3B7W27/9CGb7UfXgs6HN8dPR/NVDLitUpouSkeB/bZCB3P7
/cC9n3RjvXfUFiVR+1dcR1A2miKIQOC2TukEpjPav9/+rim2usDte4Pb21unZ9x43819s+AG
t3mB2zqlE0jxCey3NTqc2/cGd7y75nbgg9TlIzsph4Re03zlAm7rlH4PmT4oAbcVOp7bN//j
gD6pD3tG8nLc0TsHbnCbFbitFLhtqxO4/TbgPnCz/ehe0BlwT/GgZIYYQoHbSiVRg9tdOoPb
9/2N9y/tu+wjsd29oDPgnoGZM8QQCtxWKnlQkg4D3FboFG7fHNzRltsd5rTPAA/uGeYJ3N41
wXQ0KZpBGsFtvL89qJvffwYgjJK/5T7KZ78rFtwzPCiZIIRI4LZW4XMRbmFgv63QSdy+NbiT
ByXuCK8G2eTCBbc5Tcrt4OW69E27uijMtGXxfhqi0qLo5jZ+X3JUt9DCLcGdQPsodFskkwt2
glkCt3fJue3ljLw6zB1v7fZuYTXsxZx9a6pqu7Qi6jldsN9e1bgk+lfSOo19VmZTXJy+Brs2
8cCEOsEk9Vebtc5byUXHwcOIZOccEjQ9XluFfbzc+5f9Y89I1nayMpjgsd8W6zRu3xHcBWiP
H6qN/TRSOp+a50cQa1JuB9eYP5NTOaaA02ndUsxhlxrJ2E6wvXbd1c1t7LdHdQtEuQm8qJLS
PJbcRtbTQIffcaqar0qm5bbbjinlttsvlbi9BB8y/UrcZk7Hi2OP0w8Y3JbqRG7fDNwCag8d
rFVtJeAGt1PNyW0qcJsi/uaOl/UBi1+1nnP22DOSsS1YBuC2Qmdy+07gpgygk/PDCsDMdByn
vxLP0ekBJJqW24vf0EXXXOX4Vbdf324Ghes3eDDHGm77QeWjZwVubzqV2/cBd3kzEcJ7XAg2
hiiKE9xOdV9uf/33kanZPm5XRgZuK3Qut+8C7jqW/WXgRsVgZCkG98CbjUzzVcic3PaLK77b
ari9Hq8YN+A21fMFbit0MrfZN4avJo/JrtBsMLgNayu6m55etvMVyDW4nXstSM7ttY3jGzDG
we1DdDa3bwDuHdtO2nBEFVhaDcFNZ8/P2f5TTclt8kurk9uBrUc/tx/gtqlO5/blwb3T2Lat
VqZGQ3APutOINV95zM/tuMpauO32zkkDLbepOoXgtkLnc5t5Y/hK2lDsRM3HgdvWZgDus6cH
3N5V4bYLXuBw0cXKcR77/dzm/gX3NPxyC3B70wTcvjS4N2wP6yCVsUkf3GQ63XqB27sKjheP
22TAba+3AbepljBwW6EZuH1hcK8Udvou1sO1tuiNDNyONS23VzxacNszTS45q+X24/Vnp7yY
QoHbCk3B7cuCuwHbj1FP9M3z54V58uSA27vyjinmtvO3uDpux3dqC25vzwgL8Wcu7QaCoMDt
g7qV7F0R3I0EHgJu+/TtYZ5cuOD2rhq3vd9SN+T2w0UNWvbbXx3ymQO3FZqE2+vG1dLmeDUH
PQLcA7K3jS9ZxscK3N5V5rbzuf3o4zbvvOP59rM95SYT3FZoEm5fEtwdIQ8Y7YjkbWGeOzXg
9q6849dO4AvW9Jo2t109ndvbcW4E4LZCs3A7emP4CqIe9tqDe0htrWGC26Fm5fbD47abitv7
cW7DDW4rNA23LwfuLmyvRHR28YyprRe46dSZma8sJuQ2rdW4PLa990TcrtoGtzWah9tXA3dv
tNajHVRbyyY3wrw0hvOcs5qa2y58ZrJfdpXjgK3ukaqP216L3AD4oXku/ajA7aO6lXUpcFN3
rM/RWsUzitu0g3uEeZHmK4pJue2+WrjwmUl0uXA8kNs8wpMB8EPzXPodwe2julV0IXD3Y7v3
QUusUbW1g9sNsS/QfDUxIbe3GaJl23uD2yYCt+tmLwJuC+YasN/TsNrawO3G2K9rvpKYlNtf
By9uu6+Tbr18MreXBdy21Fzcvgy4yWSrbLrhHldbG7gH2a9qvoqYj9u0T9DitjU0Fbe5ntEI
2KH57v2owO2juokMXwDcVjtly7EOrK0V3KPs1zRfQVyA269D/7qrHAfcDuWiBuD2uZqN2yN+
I8VeVry14v+nRiaNzr2bgtu7Stx2++H+zCS9LuC29xoRuA1uC03PDm4yi9DO0lBunwxucHtX
zrE3PbQfg9sWAreFticHt2F8djgcm7Jg+R4tcHtXidv+sfs66uD2etI3B27Pogm5PT24vf2M
jS2ToQ7O2JngBrd3ZRwTz+1HldXgdl3gttj6xOC2Q+1mzRkYGp2wE8ENbu+Scns9dF6D2rHX
jyJuJw3A7VM1JbdpanAb48tqpMPzdd6kgNu7Ctx23nE/t3c3FtymwDS43aspuT01uM02yMb2
juL2CZMCbu/KOPaLKESnd9L/0vHBNA6x/Eh7el4oYyT2451mPPoCtxWak9tnv3hWkjm7jAwO
r631Znp8Cc9XCVNyez3Oc9uVG4fcdmkLb/oD+sbcTv2A27aalNvzgtt6u/0I90pdVvpDqXk4
B9zzFcLU3A6mKKAl87gjx23KcZtc0i95TsI/VnHpWV/gtkKzcntacA8AF5mYPJDbRxfxfHUw
G7eDEgq57fYW7rn7Tho7tmP6VOXZ8dk8WJzRHpvzQ+C2pabl9qTgHrDdNtpwj68tOgvcc5bB
OZ7r3A63Aa/t8WtL/HnBK2FyQT2HHbdXwF8Nltee5euCVwWeke0w8uMHvlURN4bq2J33Edw+
qptKU4J7CLXIwuih3D62jKergum47c9JxO3gefQ2hc7rx3N73XBvDWid+bgIPCPrYeznAW7b
amJun/nGcE40JiALqwfU1meYZ9xNJyuCx3TcpgSjbr/ktiYufSloK2j/prwB9pE+R1n2pi4x
sh8ycA7QDm73aWZuTwhu4gpuDrMHcfuMH4PmqoFPzcXtYEpCKm6BvridzB5luc0Q9vUhAS/t
JnN+1ifc+UoHtxWamtsn/qpHRqOIZWD3gDw91+Tx4Aa3d3GOfcCGsN0PQz57nSl8DOJfTpff
61OGyf5h4mf3kBkZuK3Q3NyeDdw0KhgDw0ekKbuXOsLtTJqL2xKt3GZC9x9xMKSNzqxRONbI
fsilqFg24LZCk3N7MnCPw1W/5YO4/enkaHCD27u6uV00feZKA7cVmp3bU4F72HbbwvQRSVoX
/3IsuMHtXQO5PbC8JQK3FZqe2zOBeySrLsXtg8ENbu8ayO3+GuwSuK3Q/NyeB9xD9yPdGDwk
RVsGDp0UcHvXSG6fy6d+bn8/ICrG0Qy6ALdpFnBLSr/LeNcQj+X2oeAGt3eN5PYxNZQT9tsK
XYDb04B77JOBXuuHJMhb/QdOCri9ayi3CdzmBG63iQ59mlqMYqx519H/mNrycnAcuM+f+1g3
5fYD3OYEbjdqCnCPjqATgodz+zhwnz71icBte4HbCl2D21OAezSjOgd4TG0Fy/8ocJ8986nu
ym0CtxmB2806H9y9zzFEDjrK4wRu00HgBrd3gdu5DuD2sG4dOh3c471fgdthkAeBG9zeNZbb
D3CbEbjdoeVkcI/nU9+O/gxuH3Q3Bbd3mXObgtONoyKDCQK3FboOt08G9/DHJL0PSg6qrSgP
h4Ab3N5lze14Pk2Nq42UW4Dbmy7E7XN/cfKIW8YVuB0HeQS4we1dg7ndJnD7aF2J26eC+wjH
XeV/ErePADe4vavVcW6OTFaUiZELc1v2U0rehtNE87R1JW6fCO4DHpN0Pig5Ki9JJsaDG9ze
1eQ4+vd/I3vgdkW1yEg0eLbRa/GoE3gtbp8H7iMek/Rt6k/j9vgvHsDtXW2O8zMEbtdVi0xU
n8Q0WiLVrahcmnXr11ngPsZpz67+sKykqRgNbnB7V6Nj7Lc7JOB2ffTZZRNIGtLVuE3ngLsH
qAe5OSwpTBUPnhRwe1er41xpmVS2mZFyi1txm6O2PI1X4/ZJ4OYLk/Z0682xHTtGdii3Xep8
4KSA27uaHRO43SoTbkc5ymBbmsfLcfsccGccqm+TtX4dPDguJVwyhk4KuL2rw7Hk924a9d6/
dyOrfL+Vt3FrA/f1uH3Kb7xnZsZLv8Zavhu1D+xcbg8FN7i96zTHw/VG3C5hW1brF+T2CeDO
4lR5l6z3amffcQuaz8ZAcIPbu8DtXIfZub0vmyK1ZcV+RW4fD+7sxHk3Tp21XKfrcpvUeRAL
3N4Fbuc6nMttJ7Li1uZl1UO6JLcPB3c+l6qbpKAPz0Sh1aZ+ba4YX+PADW7vArdzHWbn9rps
WExTcqZqS+DRqpuZDgZ33pXqJvmUN0Wp0UtwO1PH1uB268HZ1ZYK3LbXtbktfVBSAHQRDKnL
ahu7bnaSjs9EBZhqcv1SGfXN4DuY2y5z3nBStvGcXm2Jjue2e/0X3M51OPX33KXczlM7bFGz
dVVuHwru0ryVKZwxVgj+CtzOBmkLbnDbk3v9F9zOdTiZ265up0Jtv0nN2mW5feRvvJf8UHke
1B2aiTADt23BDW57Wt2B27kOJ/49QOHy95Z+9cFrxdR1uX0guIujrc6Erj1pU0u7XU23LuWD
tAT3ZmWGagsFbtvr6tx2IjtVLstgcmFuHwbuMkor+2d182tz2xLc4LYncHtibpNo+XvULrUV
weTK3D4K3JVpq2ygta21IyK39dN061MhSEUuak5WG3NUm68TuO1e/wW3Mx1O53Y9ehkohG3K
DUy7WesYcFdcVHfQusZaJJzCbSoUgBm4F2+P2W/NVOC2vS7MbQlqxdh+MaLc6NrcXik41ot8
RorNhG1LSGTbu82yolenikFaTQq47QncnpnbVFv/3n6tXstUXz/X5vYx4K4Ntr6HVjXVcnvZ
uil69ao2AotJWTxWuV5jtjqB26dM85G6MrdrP2T62BY4vD23jwB3fQMsv5VKWl6f20bgBrc9
gdtTc5uKy3rxxTdJrRXbXZ3bB/zGe33WJLtoeUMl8eg19mMXdOVmZgJucNsTuH0JbnMNl0gy
hzfn9nhwq3BcDkM0eUomnMPtWgVYgHvxWFXydYLO4LZ7/Rfc5jucym2PAS68EFPb5kHJ9bk9
HNwC28JJkfGddIM5j9uSl2w6XWwHrtyyx00LhMFte12b2/zb2bSEki5uegNujwa3wLQ3PQbN
tNxe1l7yTv2qFaABuMXcbp/7cFHJBW7b6+LcjhHNyIk3ZW/B7bHgFmU6mJvOVvfgtgG4F49V
JVfNEE0WlrjnGdw+ZZoP1MW5XQe3+2wlLLO34Lbh7+ilEk2aN2edjR7aLyZP4nY9SuqdlMHc
zi4tgcBte12d22xBJbVFsip7D26PBLds0iRLX4oHHRRov5HLOxmofnfpBbeG22on3k00kLy3
1mOfwO3puV0Gt2fLyUyVmt2E22a/o8dbrreiZIJamuwN5fGdxW1BAXaCe8tUvYbVPvLrS2QJ
3LbX9bldAnfQRmbJla+XLht3G6hh4BYOtb7wxWi4BrcV39fWmuUdiLgtuINwpqsrrOJS57FX
y1nTfJhuwO1sXbnQmMv1DwyVWt2G28PALRwq1RZ+tYHa5W731Uncx0SSkXSBe+tpzW1vKhrB
DW7b6w7czpRW3MKJ7JRa3Yfbo8AtHSp7c1Vcb3D5JTtulxNIceyiApQOOdfXvQ5KBrTcLlNb
lEdw21634Lbg92xEFVZzeSNujwG3GApUXveVy4HU3HYPbkFvLj1j2Xry4uOcU3pRlpm8SVFX
9zoo9SfdrHOkDlUPtras7LWO8XDHh6me0+UK3I4LjL3sJEYql+s2zLqVRN0GKZepXqOyluV1
X5pJrq0qQPdgJ5qKfM6Fx3lnqSYLs31Stn6VaiOV/YTSzPmSt82l2KOJvFwc6/gw1XO6XIPb
FRLJrFG5CEdwmxZer44ZNuzvfMWXfXvFYIvpapR8zvJDewRjcIY+H0Vus0QjJgrywuZGEM6j
884KAmyeFL9oXKEdybIaRMMFRZnzGZdCh0bycnGs48NUz+lyFW6XZWFMUfGabgun5yXi4bXd
Xzi4SZnHMalT8jnzln0aQI4VnT4fO5vZPlwsTBRB0OkE+Wml/Rpx1hmJx831ex0U/SjMMwXJ
XS26e5zFbfcAt/MdrsNtZ2Bj0HMSBtvl5R5u4+Lr0qVvD26FNRm3BdbsuE05brvSmSjXFCaf
gkcLkhAbwb2FZcZtKlLbbyAwJHFoJ3D7NtwmAxujuE0hC8j/xGYh3O9VzNX8GoJbYcyjguJS
xpDUqQG3iT0RdQg47vYLohjbwC3mdjKAUrulXCGVy56luj9Lgdtjue0K146f7arGcpvvwWXB
B0yWe5LIrMGtsZWnQp0XzU5XaPH5yXGbMRCdCT9Fr6DuV0RxrsCUtI0CdQ8ht8U/jFWmQRTq
OdzO3p5voXO5XaqwK3G7/HpHfcEmi2MfO/dV6WLFbTW4K++xqBHKLfvsBSunroPbaVght5l0
vj6Kud0G7q1L1Y3IuI/turGyQ3DbXudyu/T+xpW4Xf7Ws4HbVOJ2QADKcLvi0fesAV9xoHI0
ea5TzmXOF+yInZa5neY6TiWT2oDbXOrXDbccxaSclNW6htvlNlJss29Pcm2KDcwFbo/mdt77
xbhdiLWB248St4PWndzWgrs4UN2UeWwQnC6G5HQ+89xm3wP0rDNhBdxmw34ZkI+oBdxybgtQ
61G7FsO83Hbgdr5D5/eShTm/FLeLwbZwe8N1dQ/IcEJBCC24iwNVThkPBzkyvA5Sl2Vup7mk
0HiM8aQJG/Zrw00KEq/gpkUnJ6222jTK56DeTFkWBvJycazjw1TP6TKa2xn/x892VfkC5Ra0
oJvXIm6S53a0UDLf65UdJs1VP8LHDv2Lcr/8zpo9WTWjcynnNhecY0wWrn9a2Y3pAlXLSapt
tS1wXbG0NS+2U5aFgbxcDDD9PCCJ7XXohu9shYbzWoZzmx/U8bNdVaFAS1Ver3+ms5jbfIOK
w9Sg6ovMjHXtlHF8UDFD7XUNP9MlyWWUGC5P5J3L5PH1ba44yXukaokeGxUz7FurGdo71IYi
MWQnLxe2hvfyX6c9Sv127MXhBgVSbrGM5Dbl6+P42a6qUMmlOq8vAKbv+uZGghKKPPENKg5T
99JslwaqnbKAN7sJDTQeLYTTcdt5l5mwKFqnTNgND0pCfsol4vaWsbRhZEwcqMidQLXQNWkZ
gMs9MbRF6+cqzFsQiG0kopy6qIP30YbbfLFXhtqVCQozLFOhrvYpUnXzekdN1rcQ+C1g+F1Z
3LPukPEvzEbfQEN5xbf2C5ad2opUeW4vqWmX++idLFz/lNsuc1cz0g9rEXJb8CrPPqiqsqMO
GsgHIA1dlgvhIGSiwPTi7byd18DFrZ320aUikpJc1MH7aMRtZlDEnQyvu9J1iVNlNpe8SyqY
K3TbW6RPO1bD4QVKpqT4goNQ8lyU8lYfaM5YQL606IoSlXCo7ILmuB2Fy7pnm7PDlY7q0QZu
J5qEIGXcOVWkS8VlYrkkiTNNLsSjkIgC069wKU6iS0It/pTaF0k5AWEH72Pv77nnJ4yYc1FP
V7qeUzpicdeCSypYq0fKTWqG2+mUsJumsr9EJE5F30CzxlJutxiRqsBtF35cNNyuxU3KiVGO
yi1Sbkss68IsuSTVIOxyYs/tNcJnrj8duEd4O/aOaW1Nz9bLwzAYUU5d1MH7aMdt7vueWk+9
P3a8Th5srikVrNU9cN1eJyJuU+qEI3vFX6rVrrhh20CZHoEx/Zw81HhbnqsuMzqXWPYucnHR
3qaWQdImSDope3Mht+s5U0RZGxap5qY38F2DuL1H8foWyo/aO37F8PAIbidRTl3UwftoyG3m
gUCtp9ZbdrTiYF3hGj+OVm6/vpjkSLJQyO0gfGqrEeJjz7VrHGjBGvNRKEkJh9Jw23kXuQHS
Hm01gcqBacH91VQ2Cf40cgnSBEmVDhVfOtcaU9bcpi0+WqfFPXLc3po86jf0xlA0qaTFlNuU
8zOC24XBivrHIcbhsONo5fYWs4tbfv46hgvOhR3q/nhHXOypugZasOaST3obUmW5HeYySiWf
WdrKp555caXFY5M1/gxAOglUzI8qRqr0KLrS+taYGsLt5LDEbZe2NgxFk0paxnG75CiRPhXl
OZYZcIVrOWulbnvnTBNKkvLNepXbZXc5T8kccOoaaM7p0xRl7NYj0rgteigVP99tzzdV00f6
DGny8bVkpC5oyUoXYbXiSG6ytXYzTs2s7Tbd69iL1A96P17404ah9HSw5bZvuhaZNhWFOpUW
a2lJFKzVV1JhwceI/moZwzxpUnaX0StDmUAC+60DLZlzwbHOhKY9leY7rZIoVL7HflSMhPQZ
oiSMinmxi3SoDbnfDFWuC001+c86zf9Y1WHzdeyN2R/+fhwMpXlNlkLp6WDN7fBboFJP5RTn
qpRboAWXWY+xfWG3rYWI2/QyzW3ClWPhfQkWbsGVbkYCn58i1mhdSrdUcpHmMvDTye2eh3uS
touG25kfQJXhrW4Ll0lulVpKiNdyLrfDYmhfk4VQejqYc3vxr5R61hdJ2U+iurFSo8SBE3Xb
Woi4vRpmv6xUDSUfR617fqDqWvJ9dsSv7EBhnSUXw9Ccf4nrRtvZglm/sSJUP15XbSibP8a0
J21wq9uSS82gm2PgLJ3O7Udy2jKUng7d/05ZdtHWIlOVWVygjnMvidXlrqVLwEm67VFkmlBC
DjeO25KFnx+oupYy9hq+tygFzLXP+4h+4hvAbVWsu2PFWyIaDx15993WotKE4xrDSC21D4mV
P3uebd/NdkyBc+tIZuT2KzW1yEiRixIVKPJbNpNtQ0siJ+i2x5dp4iN6Cz/htvPad5VIPRX5
gaprKWfvXG5vtijMRPQxOL3bFfjWxLq7kAxS3DDtpewTqv4TmiqWnlBCS8a0XHTcdo/ktJXU
ay3qMILbz/HWIlNUW4UJMX9KdrJNOPws9W57BJkmCbfdI+F20qbsrRpK0UJ+oOpaCjzG868y
oOpBpRFSxO2oW+pobyVJfdvskDAv0nbHSlUXneUberWytcozyB8+gmJwXEcbqdda1GEIt197
ykpk4mmpIoE8txVDbP/ARjwOO27vvEm4Hf5E1lUitVTkB6qupZxBfcRO7zB/0bNrzm3SBus5
kf1E2OZgpFR10Zgg3lDnUmBtvg4X9vDdub1Iue10HjJNqHzZs5T1l9Jns1gPszASD9H7gCNu
PyJuV7xVVMlFfqDqWgodbnL6/qouVByfltt7yJISosbpEaamLYGDpaoLEiRRJtGS1tt0u/VH
chhyO4zFNBD1Wos6ZLjNr22NhNwWfZm4yhVHVS/4lnE4M27TPt6U20GjireaWob56ZQk08GI
Ikst/VUdil62K3EqM6ldttOi4FsGuBkXVmil0dHSzY/ZANqKqax9KJ5t3812HPo2j0Rd81GH
YdyuJ50kNUqetVJTksxy0xicFbe9CGNukym3W8FN1QSK/KmjV/vdE8lac7vZOrdpn5aiWb99
YkSgZZGYb8zgWOnmpzVBiUQJazDqNuueo0d8HPo2j0Rd81GHE7ktmRgSGyNBxbcNwlXtirjt
B5jntmCkdVFmJAIZ+GvqrupQdBMmPI7SMb7X86LoqV4NnGS5oT2YiaScH4sKXu2Yc3sbi2fb
d7Mw15NPlnE0djif26VGJLYlelzePpCyXRG3/VHE3H4ENdRfIZQbR1Vt/hSpykSr7lB6fu8F
FfcKowvjliWgKUvC7FJrCodKOT9WI+gpyLzWwXi2fTfbcejbPJKmmvc+nsltqrWSm9qsFZu0
DcJov714jcrcrjiri7JjqarfYVtvVYeyHwW3NWb9VqIoY8vv8R6g3YOSnoIs6DUaz7bvZjsO
fZtHoq75qMMwbkuelpaXOvnWBCOrT3PbQGyeb5MfHsNtr1XFWVWUGUltoFTLX166mWLi1Xsr
XHWr1SCaam7LZn0zJSs5w5Je7TkcKe38iNIoMzOA26/heLZ9N9tx6Ns8EnXNRx1GcVsUGe2t
yyE46cjKLVsG4ozeJwnGkXCbDLlNuaGU1f4eoMF+26k6lP1QhtvVn2VIFr56hvZKkpjuLwBr
aevCoIYfY97f3i07z7bvZjsOfZtHol5rUYc8t53MXg4Cosi29omzwJoilGLT0nVaWNW6VT37
FFmik4H3zVBvgVT4mR+oupZil5rJCnurOoW55C5vrZIoS47SHqy0U0TivHy2vAG3hXmUWBnC
7fgBre9mOw4HbR6Jeq1FHcZwWxqZxxCXOa8o4+o8l2yFLv2BmHA7LMKE2w87boc1yQXUM2MC
ky0RO727kr2XVYbb1W/B65GQLl6SF/HXBNTakizBrI1toiTRhGFp1F/Ej6Hcjpaj72Y7Dgdt
Hok6p1GHEdx28siYFZ8xJxDVslsyRonfzVg9hkKYT0RTOBKO265iSKggcj6grhkr+NTOl9dd
1YcqI5yK26RIytcEVBoLJ4mxEU28JCCVy7BD6l8pdZgq+azw3WzH4aDNI2nKqfdxALedJjIG
IpFkYaweLbntBN32UWSa+NyOTmaaVXzVIylnIT9QdS1lLDbE7JTti15oexvbRefr9SF8Ci0e
I4WlJDBcaS2bJK7AmleWui6qiZZoWcz//rafFy9EP9rtOBy0xYCiQM7ldloOzrvS0r8DAoJ1
6XLX8gOx4Ha0eIdxW5C03hmrW2wI2lUbhe2LXr5yyaSSBPXBRkJpM1GgSmw/E1FpThJzyUzy
y0wYlr4uesv4ZcOe2wsHa38+9+NgCC1lXZQ6p1EHc25rI+Mrqo0BgnXpxHE4UbfdcabJDpEl
OhmbeAjIUpFkPXbPWM4rkzlxf00XqlUGfV4kJhJBfUi4Te2ro6jnV5IV46IExxFmXYpHIWqY
9d8gWgZw24vLG72fiP14eStu6yMr1bYsBj/qWs1nL+cHYsDteDA5bsvXUjaMarCFpdu22tIJ
VBpQuqWqk8+LXJtscpxnmbOX2mHNZCLVyG6/7YJPWXfCYUjaeWqoAs5ptxXGqHseehH6we7H
9E7cboksX1ai7mHUzdwuuK4no+D4E9EUrxGW266X2yRai10DFRjUG1H2oGpxvPCXtKGMJ3Ke
Zc5eYl82S9nCzquajdwY8hEW/dVNSW8/iX+J6bLTs7m9+P1uzG0XX5GHVK0EqSFXuF66XC7C
ktVHlduJTYbbG98rrvIi2UoMxuniS3rv3OzpLCjd1n2sOY+t5pbfyu0MkEnKfz5QlYy47bWq
OBSMg5vhiqF8lKpkLIdx23lD3U/7/ewjUcvr38vt7Myp7iiVIKWquSyNKj+Qbm5TYpTl9tLH
bWJjT9U10Iq9jN0GC2VVHnx+SwWfykxdBdxOY2/ktn5Yi5Db9bWxRUj1XIqMiUKPBt+bFXcg
t5ekwfNrkv30bbkddSDNUJNhiHtqXJZGlR+IEbejk4yNrvIgPvZcu8aBFu15hyoTyupd6l9Y
lbidnHw8/KUq4bboQYl+VMv6rIwJ0QtGlN5XKyr4WlW1JTES21lyw1AlQzRUjbao/DR+HtJ+
eg2b9kNZnjQS5jSbYTtuc5FpRpItAZUNV3GRu+7lMWlSTwbbbTXsUqs8t13H2CkTe64h60k8
62Eff5nlcigzIVWd2/wAiQ8t4DaXFs6++aBeeatkj2TppWV7qSawzoRXNRZZKcQe9enMy2hu
Oz/U56dgHEtA9ltxmzib+yX9aERe8yp3L4yqMJBebjNmuXFSD7dZL8WWbQMtmFvK9wSRCXEB
VzxQYYRcpbridX5P4pJ2sSNVOrf2lV4kM/sVYZhZzpAoSOkEJePhjGlm2Z7btFrcxr28oEzp
ewEUbM7vyW3+UsOARqowqsJATLjtopNpa7ahUJQPPhZXBN41rfugqrxiVNhpKOFh3CYmdOJ/
MpFs+GNT1R6P+iQIJzpJWaFJxZR0gpJO3Dg0s2zP7TW7tMVLnq94GK8PFJ83kDSnuQTbcJtr
S/ZJ71VhVExqJN283pkmbIbYnyvyqayJCsHzXrLPHpXuvfJzj4jiDTbEBVxxQLkxEnfaP8WE
zvmqjLCwLHLaslbrRzLLYcL49lS8GjSruUsSS5kUaWZ5ALdpS3L88JpJBq0XXGW+2+JQy+vf
ye3CvEtm+2AVRlUYiAm345NM61IIdffSbJe86KcsKiqvGnkPOa861R98ZkNg8kRlbhNniIoj
pIap3HrUOpJsroOs9gUqKQtK3LQW89r39dyi0ULZdJiU1wcmV1tTUco1kuS0JAtu8y17Ixug
wqhK9VtPRqEzcZYL3C47ynqX9mTD8S82ud5Mxp+lIWnairmdM+CStqXrpOa2jIaRti61nsUZ
jOxVK4MkpSOaoCSoYooExgZxe0uMC075XpPG7pbczly6FLeptBYMuJ2cZFqzLQXSYLv8Gpl6
yihmQ3JCaETnsL6g88NMLkTuk+v81FYKX88sMbdl93eP2kVrklhFE5RiuoN1I7nNrXXavqx0
TGPXNZZ8ED39+7hd8n45bjd081oUNutcNTCti/eOsm95qosDVU9ZCgchLmIj0rb93E5mM24Z
fc4MJW+/Ddv7TwgijFbGTx62JX7ryaxYefA3vNYN9xrTNAi5H7dL1yZJ+qYiXVu6eS2KX/2k
Z7nWTYWuw3Z5oNop8/BQOCUIyek8ChZ03iiFl5JQw+uUmRTKOSDl6JM4ZNVWbKTAtuSnPDm3
g5iyKZLZArdL6uN2rXhaIhqoErebunkt8t9pMpfsuL1UF3HUvtRSu9J2OrjiuaoVsdMVox3c
DtPMwM2/TtmRZFZyK7b13M638qgt5G39iXrdDrGJrPfLxvQAt/Pq43apzZW4TfzpWrete3aJ
ZNZ9fs0X/bChqbBdHqgKoZm9NXvSzKmY21R+7vVyyVN2P1VILz/AZmzvd4t6OqgQ1iPEdsXS
Zq3YTliXLLcFAWRMuQe4nVf3v1OW1ZW43dkty23KrGIrbpMS2zXpbPF4UEFD69SE2wHZvp66
lK5nfkYhNuxmbGu4/fBiy18TT0E1YmFdJhmhZtqB2zWB2wbdcmskh1V+zX/a0YVnjW1dgshn
W/V00YzY6YqCPm7H75lT/vrXZS48Nux2bKu4HYbHBKCagipeFdw2elACbtd0IrdlgSdr6tk1
V7gVj0O4nYllW11xe8pFrgzPHNu6BOUmQTk5qgoWc7v8ID/6SYipsWCOWFPMzHZgezcnyZsH
Zr8tLb4cyaaAalMlnaFk7MIAeEvuAW7ndR63SVhUrGFf8pBGcDtaK8yVqG8hcl14pICjwqTS
fRqCcmpUFUwvqxMs6DTuHmzruB3vq5mN9jcjUmzWqkg6Q4m/dbbUWvtNMM1Ptc9rRqqqZ3Qe
t2WpyO9ilXh4uXTVRmbd9GJuUqXG5thWVVM2/1mg9/vc0DDBgk4o1YXtvchEaeNWQYxtMW0s
uW3zzSS4XdPk3I7jyNSrMKTZua0R6YYuNyptm6ezjtuqQUzE7ThwxZAz1lx4UHVew7Y0tWtS
S9cFZhhM1yyXDL3+29B7gMBt34WI28zayJSpxJqsoUm3oRqCbc06oz35ikuMVNmdl9ud2NZy
uwLuZxvhdJpxOzXUWKLejaeh9wCB276LeuRhJRQKVRTtfbg9BtuaoZZSr5oWNbdfncR9Rimo
TerE9j4iRTFXF4OsRMy4nfprzAm4XdOFuE1LSZJw78PtQdiWD9WbDOXFZper5VcncZ9RYmrT
FZpXpOa25IdPObdrb02KIjJ7UAJu1zQ5t71WRWrL4r0Nt0dhuwUaXHvFrOgKmGZa0PsU9GO7
gduCL3tk2Ky1kk9RegdoK9O10xTT/Clw23chrKmteVn1kO7C7WHYFtcnldNeuRw3lcc3Fbe3
0A2wvb84pTFUXQUm60IxRSy3S7azZoL/nq30fmRhsaf/FbjtHlyFuvhk3dhNuD0O26pfsShl
XT4rF+e2exi9kdnE7ervMhzNbYpNtRFvLm6v/3Swpa7NbfGDknx1asB9D24PxLbqV5pLYVQb
bNINheZa0F9hkMmEtHH7UblFJhxlReXgldw2eFDivVuj7msvGrDgrstt4Z34s5VHASaw/arA
VtxZorm4Lb1JNUm2zgXbafHdVDeUCbltg+3HZsB0boWLrG5E2jbxJ6yo2IpbrWm7DhG4HV5v
+M0wrocQEbfg9lBsC8fqzUlHE4VD3+zaS95pmPza7LU1htsm1jSMSTDddOeYjdsTfi/5/ffc
6QO4rXlQUtu8CRfPDbhNY7EtG6sAV1Sds71d3aHX3K0RyDsNk/jmJNCWBdvZJQNjWm73fzPp
vVuj7DlK03H7zL8HqIVEvrUEEXfg9mhsizYWIiYL2L7aUoQ3F7cfoiEKTbndpiu0U4oMbKnm
KKkK5Z35ZWQzpuw5TDQZt8/bb5Oo4j1IlNqK1s/luT0c26J6Em0zRY3UP4BOxm0SjFCoQdy2
kIoxKaYbEjQht43Vze3z9tskqXkhtldwl41dndvjsS3aHe0zUmopblVzF4a3dVP0GiY7bO//
5s401bZJx5gkIQ0l671bo+t4GV2Y2w8BhTxqV+IhQaOLc/sAbEsGK9xJy5pdmtuG2L4Xt13c
3fFtszbcZkvX8TK6MrerHPI329VwBGvo2txeszHWS32w0jmRtNOu6fVx7RQLWlqZMmOeVRuL
ZtIxhpIa1RctuF3Tqf++ZKXwVdiWvJ9yaW4fg+36IpPto4UNteU7E7cVpSnQZmWOavOlnCSW
207l0XsnUtXvOro0t6lY+YsvgcP6Iro0t4/BtvA1IBGwBC21I5qI2yRNg1JzVJsvJWMoHgGp
6xbcrmkKbnMNl1CCaOjW3D4I29UnF/ucWbx3ok0t7f003QZIkQedpqi2QA3c7nxQAm7XdCq3
8+D2VoV8U1NdRBfm9lHYro5WMyXVtrWbRNpht6zpZq9XgTr1CKqaodpCaRmTFKo6SWvj06d5
mK7N7WBXzZ/9vCAkVnqjT705gR2jbpY6DtuVZHs31LqpauPm6j17Qa/YbvvzG0VNUG2RtLOU
5KS6MGOtvc+e5nG6OLe9lZ2V+Oes+3L7QGxX5o29z5ZMLSvhctaagjx5QdM+KPN5Ob/aYrVw
u/sV7rVfQ68r6OLcjrfWqdxD/nPWXbl9JLbLya6SOFSN8hflNnljArdTJeUhXcCMoYZeV9DV
uV0Dt9saCW1VrjuBGaNuZlKA0shd1lUNxJEqmG9dzicvaB/b9g9Kzq62VGrGpDlpvLuB2zmd
zu0yuN3eRmiqct1JQrLpZqWDsV3MYpnD2vYX5XZ44wK3UyUl1FjA4HZO53O7BG7fliCeWnVc
ktt0MLZLE0fp1NRt5TvI7TA92zoaKBpP+yCy5p2lvX61cdvFJhzftmJH3+kSugG3s+B2YROZ
IVe+Xrps3M1Gh2O7tMbYuSmq2OOS3I5vQ41IKtm3NGcgPWMomdm2qQa3c5qB2xlwxy1kLl3Z
T+mycTcTHY/tQrKJn5ySSl06iHfegk4GA24zYrnt1J7B7Zym4Db3OmDaoB5QzeX1uH0GtvPc
3mdHHlChT0ftnragm/cUGg/O0JyBGuYpWa/UlCVwO6c5uJ2Qm7ssCOhu3D4F29lkl/bORWOZ
Th3AO2tBcyMBt/kuBlkCt3OahduPfWfGOpZNO93r75MQh4lj3Lq53Zy0oNkKNU7XLbidrtem
LIHbOU3E7ao112vkYtw+CdsDfpeE1fW4ndlYgNt8HxefaKG/tstF9Ebcdt1GLsbts7Dd/GvJ
ei8dfS1DkYkyPw/aTtI9uG3zzSS4ndNVuP2wMHYtbp+G7WMelDRtwFadkZccto3TdSNuu9iK
49uWjKgdX0Nvw20ysHEpbp+H7WMelHTR7oTEZLENbuc6ueBMQ1GB2zldhtsWuhK3z8T2IQ9K
ukZ3fGby2Da+zd2E2yYPSuZDiJXAbYUuxO1TsX3Eg5KuxyTHL+gStsFtThYPSuZDiJXAbYWu
w+2lhImD/I/10HdrOLq2qHgfNb3N3YXb6Y1ZX1TzIcRK4LZCl+H22dg+4EFJ353h4NoqY9v2
NncXbls8KJkPIVYCtxW6CrdPx/b4ByV9j0mOXtC1p1bgdqabi0+ofxWvwfEVBG4rdBFuF5+l
HqTRD0o6B3hsbdWwbXqbO3vmU3Vwu/NByXwIsRK4rdA1uD0Dtoc/KOm8LxxaW1Vsg9uskqSp
0zQfQqwEbit0CW5Pge3e5xgS866j/5G1Vce26Y8n5899rNaVzD4ocXxbXvMhxErgtkJX4PYc
2B694e61fmBtSbBtWewzTH6o5sFxD0q0Bpoczy9wW6ELcHsWbI/9ZrJ7N39cbS2iCTHM1hSz
H6iL2y60pDbQ5Hh+gdsKzc9tEu3uDotklPHuW9NhKZJh2/JByY24nd7NHNsuqylWwhCB2wpN
z+15sD32QUn3GI/KkRTb4Dar6/xYdbTAbYWm5/ZE2B654e43fVCS5E+t7B6U3I3brsPzLGvB
XuC2QrNzeyZsj9xw91s+JktybIPb2Z6Xed2zKsvVCW4rNDm358L2uA23geFD0qTAtuGDkjtx
++TX9NfHjn5CF097g/1UKRbDBQpuKzQ3tyfD9rgNt4HdI/KkwrZdud+K250/hvTmlJgltbN6
dRHKlSyZLVFwW6GpuT0dtkdtuC3MHpAoHbbtHpTcjttn/hkazn80sQm4ufRT2KIvqNVgT39w
e1g3tRMNJo4QjQnIwur42iLtErW6yU1WBI++lXwyt9lshhMbYDy3CP1iMJlocFuhibk9IbZf
QVkbNdnFD68tNbbB7Wxf1+y5P6WU47bzWsSfki7R4jSYIXBboXm5PSW2x2y4TWwOry39D8R9
hAo8W5gxVNdK7rqdHcHtuCCZhZjAvL/6wG2FpuV28LPaRBqw4TbZbg/nth7b4Davrro2+cks
8R5NbRQhpTOfLs7T6QhuD+sm16zYHrHhtrE4uLYasG32oGS+QuhayV23szO4nRY9Q3LtH1pJ
BG4rNCm3p8X2gA23kcGxtdWEbasN93yV0LeSeybcYJopyWbM5XQzHYXMFUPvHIHbCs3J7Ymx
bb7htrI3tLbasA1u8+qZcRNus+8BusBJGGDUgK3Z3g03uK3QlNyeGdvstzTd5mzsGFjJ2m4b
tNmPEnrXQ9W3kqkjLRYJ5bkdOokyHlYpP4DOSQK3FZqR29S4uztIZBqc2fZ9YMKasQ1u85qN
29xjEBe0CMuUXwHkklMagdsKTcjtybFt+6TE7iYwLmPt2DZ6UHI7bnekxWKakwfcdW4HTXIL
oP838Hv6g9vDukltT41t068mm4nIWbIwk4rasQ1u57s39h/GbVf4/AhDzoXfN0vgtkLzcXt+
bBtuku0sDeN2D7aNHpTcjtsdabHhdvwKn5Dbbr/MRUG9UYHbUk3H7Qtg226XTHbb7VHc7sN2
suFuWtr343b7zyEm08xxO3LC/2J7/nK/wG2FZuP2JbBtxltDbA/idie2E0A1xXg/brdvuI24
7eJgFNxOtuc2ArcVmozb18C21fMN08EOSVsvtmNAtb3je1Nuu8aOXY6/RA3c3mkNbp+vubi9
dGPiKFkg12rX/tSI2qL++yi4nTXgWjqO4nb5xCPhdn8QaVDgtlhTcfs62LZgLtn+bDGgtgyw
HQFqpmrrUf9Kbs2rzTQHRtL9c5nbg34kBrcVmonb/T+UH6h+cNtiewS3DbAdlgpNVG1dsuG2
a+vX53jzHsrFl5PgtloAt8/XRNy+FLbX0nen9WfsmdnaLBqsUN/ERNXWp/6VTI2ptZnm9Sep
XbETcHsXuF3QxbDd+5jDfLTmtWWDbf9BCc1TbZ0yWMngNhNTT39we1i3gq6G7U5wG0ExtGho
zS5CcDtvwum7mXE7MBlFUuQ2DVqn4LZCs6yk62G7i2z22Lbmtl2Eu5nWGZ6vMIy43WDDaJo9
KwyH2Yla24HbE2iSlUQDQDZezUEvA+5S5rt3qwi3FDUv+Ftyu/FBiRm33XoIbtcEbmd0TWw3
020Etm25bRkhrYaaTd6T29Q0LKNppojbiRNwexe4zeuq2N4Cd6peQ7Btym0yjfBlqX2S78nt
tg23Gbf9l3zA7aLA7ay1S2K7CdxtrK/LMIG22H7xqePmfGNuu4ZO3Y6fdvwwwO2SwO2csYti
23uhalgHqexMGmP79UCgY9w35TZNwW0Ow+B2IHA7Y+uy2PY47ETN19b2wzWzaY3tJ596Bn5T
bjc9KLGa5u0BN7hdFbjNm7owtv1fYbBtq5XdgjbGdvRb1W39LcMxkB23nb5Pv+NHzO3UCbi9
C9xmLV0a2z6MnbThiOEaWaUBEYLbeStaM4a3580guF0WuM0ZGlQGx8njsSs0k7Vqlk1tjcB2
+FvVDf3nKxCjlXwitx/gtljgNmPn8th+hBtKvoWPLjcqhn4jQ7AtyU+tuzOOqFNGK5n0Vgy5
7V4hpNkFtwOB25HoHtiOngQkc0zFq3YhmBixD7F7+POViBm3nbaL2exQK7eb/1xBNSBwW6xT
uX0bbDN/YM1lzg8rAAvTB2C7ZbbnqxGrlezUPQy5vbz+k1pk52krDXD7fJ3J7Rth+xFvuXNy
I/0bmLDHtkEG5iuS81ayneMdwg3cHjB6cFuhE7l9L2xzW+tUA933Wx8Ro8mda74qAbeNgvAE
bit0Hrfvhu1HndxDnXfbtw+STYJrstPQa6TuwG3KP6wuc5vA7dN1GrdXxvVZmU0lcg923euh
Hau8cqlocABu7zLmNum47Z4dM0EkXZTxgNtincXte2L7kcWVG+64M5n2cdplAtzeZcntRcPt
vSW4fb5O4vZtsf2pBFjuCK992aQBkYLbA2To+NMSvwrL3M69UELMOYXAbYVO4vadsf3Sgche
/bV3HoHtzIa7wQe4vcuU207Bba8luH26zuH2G2D7cPXkcwi2c+DW2wG3dxk6phe3HeekxG3i
J8Tg0WlPf3B7WLe9N7BtrY6EDsJ25klJkxn72Lp0E24vJOa235L4aQS3j9MZ3Aa2R6g9o8Ow
zW+49WbA7V2Wjlu5/QC3z9YJ3Aa2h6g5pTRwQjhw662A27tsuZ2ZEIbbQUuW9g1/bCXqD26L
dTy3l2G7u/dWa22NxDb7pKTJiDOPrEv34DbJuR1uzAncPlmHcxvYHqTG2hqLbW7DrTcyX728
HbejRct1s/iVjp7+4Pawbrf87fZJ1FhbY7Ft8wcR5yuYO3HbsU7C0xTNHLPhJnD7QB3MbWB7
mNpqazS2mSclTSaceVxduge34110cN6VGjLc7g4M3FboWG4D2+PUSsTB2E433HoT85XMnbid
Oe+8z/F2m3tQAm4fqUO5DWwPVEttHYDtFNxObWG+mrkJt0nI7XTekg13f0bAbYWO5DawPVIN
tXUItpMnJa7FgL7TUL0Xt7lpi8Cds6QMpqc/uD2m27rvanAH1aXPbDNHlYo23Hp/4PYuW8d8
ZimYJuKXbXjOYGWD2wodx21ge6zUqT0K2zG49Q7B7V2Hcdv/43+c02CHbbG0wW2FjuM2sD1W
2twGi3OwwG0z2Tqm7GOSSHzf17zYbMnAbYUO4zawPVjK5B6J7XDDrXcJbu86gNsiaj+SWSVw
+zgdxW1ge7R02T0U2+ES1/sEt3eN5nYA49qaDRuB28fpIG4D28OlSu/B2A72cHqn4PYuY8e9
ifXXNfWZArcVOobbwPZ4afJ7OLaDbZy6M7i9677LCNxW6BBuA9sHSJFgOmFCCNw20X3XEbit
0BHcbv75GFJIXltnYDt+Fqrt6uwD6hG4bS9wW6EDuA1sHyJ5bZ3z4w+B2xaaDyFWArcVGs/t
45+lvqfEtXXWUysCtw00H0KsBG4rNJzbwPZBktbWeV82gNsGmg8hVgK3FRrNbWD7KAlr6zxs
tz9Xn6+AwG17gdsKDeY2sH2YZLV1IrYL/y5WRfNVELhtL3BbobHcBraPk6i2TsX26t41dFP3
GStw217gtkJDud38gzGklyTPy8n3UQK3e3Xf5TSG22QAoDfjNrB9pASJPhvb8V92lgrc3nXf
9TSG2xYV/2bcBraPVD3TMzy1Arc7dd8FNYTbrV+pJEb6LJhrILeB7UNVTfUM2Ob+IfC6To86
EbhtryHcNvkR8624DWwfq1qup8D2VxjqECYIOxK4ba8R3F4f1fbl7J24DWwfrEqyJ8H2Z5zq
GKaIOxC4ba8R3F6x3Vc/b8RtYPtolbM9Dba/ReK0XeYI3Be4ba8B3N62232W34fbJo+VII2K
tUUG1Wslctoe81USuG2vAdzesd1VQG/DbWD7eJVqayZsP/T/ntV8pQRu28ue2952u8v0u3Ab
2D5BpdqaCtt6zVdL4La97Ln9whD10uhNuD3Ps9R3UqG2Lo5tcNvTleexLHNu01r2veX/HtwG
tk9Rvraujm1w29OlJ7Ioc25vHOrdcL8Ft4Htc5StrctjG9z2dO2ZLMma27TXfSeS3oHbwPZJ
ytXW9bENbnu6+FQWZM1tD0TUtwbegNvA9lnK1NZygwmZL35w217G3A5Y3bcI7s9tusHu7qLi
s34HbIPbnu67uLq5/f33/seg8Ps23LfnNrB9nti03wLb4Lan+64uW25HpO5aB7fnNrB9nri8
3+Sp1XxDALftZcvtqPK7Ntx35zawfaKYxN8E2+C2p/uuL1NuJ5zuWQo35zawfabSzN8F2+C2
p/suMFNuJ6Xfs+G+N7eB7VOVpP422Aa3Pd13hXVz23ufhKF0x2q4NbeB7XMV5/4+2Aa3Pd13
iVnut5na79hw35nby30wcU1FtUU3uo/OV1fgtr0M99sso9sBdWNuA9tnK6ytO2Eb3PZ0lzlN
ZbjfZmHUvuG+L7eB7dMV1tadsA1ue7rNpCay229nCN3MqNty+0bPUi+roLZuhW1w29N9ZjWW
HbczNGrecN+V28D2BPJr617YBrc93WhaI5lxO8vnVkzdlNvA9gzyautm2Aa3Pd1pXkOZcTuL
o9YN9z25DWxPob227oZtcNvTrSY2UDe3X99LFujcSKpbchvYnkNbbS23m5D5RgNu28tqv10o
/8YN9x25Tbfb3V1U6xzcD9vgtqf7LjWj/XaRzW1r44bcBrZn0eL/k0yzca5P840H3LaX0X67
WP9tG+4bchvYnkXPWbjlU6v5BgRu28uG2xUyNy2P+3Eb2J5GX9NwS2yD257uu9psuF1ZAE0b
7ttxG9ieR5/zcE9sg9ue7rvcTLhd5XLLCrkbt4HtifRtIm6KbXDb033Xmwm3qyugZcN9M24D
2zNpWeXOjsRc8w0K3LaXBbcFVG5YJPfi9m0xcU1t3D47EHvNV2Xgtr0suC1AUsOG+1bcBrbn
0n2xDW57uucMf8qA2yIm67l1Q263dIZG6L7YBrc93XSKHybcFjFJv+GmZUZVhsmqpy80RM8J
OTuKITprZZR1Wi7OcTxc1Dm0H37/vWxi1NNHp9RXTa4hRx1doTH6mpCzgxij89ZGSciFvXoy
sz4ncbWGslZxh+mkGcGq9p7QIH1OyNkxDNKZqyMv5MJePZn5/PskMhtaT3RqTnJyDTlq7giN
0nJbbE/KKuTCXj2Zeb0H6OotZa2C9hNKNYSXvjo29IOG6cb30ZMXSEbIhb16MvP6vRtZElWW
6ey0sHINOfrs19ANGqf7YntSViEX9urJzPP33J2kqazV3vzstLDSjeGpBdieTe7sAMbp7BXC
C7mwV09mntwWNZW1uqGAbQg6Q2eTdax6MrP/e+5QTsA2BEEz6Ru3f+3j4+O/+N3v/Z7/3z/1
3Xcfv/Htv/+VP/TnP/7Kt+PPcx8f/+J3f/7jx//o1z+eLT4+fvB19v8vAAAAAP//AwDXntzX
8DYbAA==</item>
		<item item-id="26">iVBORw0KGgoAAAANSUhEUgAAH0sAAAAMCAYAAAAXHXAzAAAAAXNSR0IArs4c6QAAAARnQU1B
AACxjwv8YQUAAAAJcEhZcwAAEnQAABJ0Ad5mH3gAAA8aSURBVHhe7d3JVeNKAEBRJ0IU7BwB
QbD2khg6BEfjZByMvlRSSTVpMA2fBm6f49ON0VDDld27dzqdTt3RV9f96dZfr90lXOu5u2XH
xfefuus9Pb91/Ft3PafjGc5Zue79pTtX94rXL68zXvN8fWuO/359Wtbg8pofE+5z6i63Yu63
5/6cdHxH1/HonNpz2JpH143nrM0z7F0Yd7lHW/u6v+fV2sT9H+51funum24euPd0vVvYr705
jG5Wx5aN6cC6fdQc/oXrrBi4XXbs/Atj/4QxhOf/I51+whi3P3sfeIaMbeM7zDpyxgADDDDA
AAMMMMAAAwwwwAADDDDAAAMMMMAAAwwwwAADDDDAAAMMMMAAAwwwwAADDDDAAAMMMMAAAwww
wAADDDDAAAMMMMAAAwwwwAADDDDAAAMMMMAAAwwwwAADDDDAAAMMMMAAAwwwwAADDDDAAAMM
MMAAAwwwwAADDDDAAAMMMMAAAwwwwAADDDDAAAMMvMdA394+9fHY/T/jcVuLHKPmRaA6hJmH
kHgRS5/fr4PWebx4uW4WAT8QS6+PL2LQUwg9O24a1xzZ3o2l52syBKdb4eXH5/SOgPeREPqR
Yw4HlXeC5J8USz8WXxdLX31emwaG9Sqe0cMOvvuH7yNWvvtcjf89X5TO4YYBBhhggAEGGGCA
AQYYYIABBhhggAEGGGCAAQYYYIABBhhggAEGGGCAAQYYYIABBhhggAEGGGCAAQYYYIABBhhg
gAEGGGCAAQYYYIABBhhggAEGGGCAAQYYYIABBhhggAEGGGCAAQYYYIABBhhggAEGGGCAAQYY
YIABBhhggAEGGGCAAQYYYIABBhhggAEGGFg38MGx9D62fO3j6JfXOaw+xMMvlyGYnoeYQ1S8
Py7+nW5SKyx+ub5059Nzd4sB50dj6d0YH1/GNgaSs1B6vHYak/7EWPr2nB6Npa8dP807BOvj
K1nHbonRj78v17gVuY/HxMh0fo05NJ/F0vNjmus+x7kbYx5Mxetl1105dppXGb1PbY7mttZn
Y22aIfGVOQZP/XNwWx7EYHx+JnbWcTK47F96renc8HzE/S2j53sG+nFVYfu1dR3msLUurfEM
XvLrLWuxM/dwr2E+8Z65vbgmqafwmZJ4j/dae39wkH/m+NL0pckAAwwwwAADDDDAAAMMMMAA
AwwwwAADDDDAAAMMMMAAAwwwwAADDDDAAAMMMMAAAwwwwAADDDDAAAMMMMAAAwwwwAADDDDA
AAMMMMAAAwwwwAADDDDAAAMMMMAAAwwwwAADDDDAAAMMMMAAAwwwwAADDDDAAAMMMMAAAwww
wAADDDDAAAMMMMAAAwwwwAADDDDAwFEDVSx9iAy3/ozvby1sGjWeYs1D5Pn80t1DLDoNOMdA
cn+9NEw+Xb8ZS+9D00PseI4i/20svXHfZX7J+D4zlr45pwdj6WGcK5HsJF6fr3cdjB8j3lOQ
unXNbN3KgHXcz2kcc4A7Wc+wx+XPqasyat//bhhHM5a+cWx6j7U9LOLsecB9Z22qZ2F7jiHU
PTwLw3nVuu6s4/1tPC++sudpOjdeuwp/N9Zo5Zlb5r+/rulaZWZiSH0eT4ykLzabx0dzwxxb
80t/X/nZ+Dzp1/pyfas/Z+L7cU2bz48vkqNfJI5jhQEGGGCAAQYYYIABBhhggAEGGGCAAQYY
YIABBhhggAEGGGCAAQYYYIABBhhggAEGGGCAAQYYYIABBhhggAEGGGCAAQYYYIABBhhggAEG
GGCAAQYYYIABBhhggAEGGGCAAQYYYIABBhhggAEGGGCAAQYYYIABBhhggAEGGGCAAQYYYIAB
BhhggAEGGGCAAQYY+L0GmrH0VjD9eCx9iZoPUeQQVS5j6Y3gdhVfnmPLZbg8DXlP/67C1Y3Q
eDGGPMheAkjO/+RY+hjObs0pRqb7yHYfql9eZRB9Gnsr/r7zXnsNyrkX92vs3aWPvi8fIsn5
MZY+R9OX40I8PI24ZyHwlX0tr3coeF9Hz+sPvNrL7tqU5nbnGMfx2l3Pp/G5mK/Risc3DDeP
b5ybhr8PuRjvNe/jxrrur0s9nmqvszD53tyH3zcMJnH4YR3jPdae6+3nfXDZGsfv/WLwnwJ7
zwADDDDAAAMMMMAAAwwwwAADDDDAAAMMMMAAAwwwwAADDDDAAAMMMMAAAwwwwAADDDDAAAMM
MMAAAwwwwAADDDDAAAMMMMAAAwwwwAADDDDAAAMMMMAAAwwwwAADDDDAAAMMMMAAAwwwwAAD
DDDAAAMMMMAAAwwwwAADDDDAAAMMMMAAAwwwwAADDDDAAAMMMHDUwGosvQymPxJLHwPgfSj9
PEWOi1B5GU8OPyfx4zxsnEeMh2NDaDqNjK/E0rPIeBFX/mdi6VPouZ7TViy7AbwR627OMQlh
rwXL5/ezqPV0z91Y+hKu7qYx3a5PRfB9ir83Yumb+1LE0sN1i31d4I9ugoHVY+I61mu9uzaF
uTDuLGrfmGNYu9Z42qHubAxhL6ZrTn+PcfPtWPqegbBexbO0tQf76/IRsfTEUJhfHkvfXOt0
ndJ9X3t/3sciGF99pvhSOfql4jhWGGCAAQYYYIABBhhggAEGGGCAAQYYYIABBhhggAEGGGCA
AQYYYIABBhhggAEGGGCAAQYYYIABBhhggAEGGGCAAQYYYIABBhhggAEGGGCAAQYYYIABBhhg
gAEGGGCAAQYYYIABBhhggAEGGGCAAQYYYIABBhhggAEGGGCAAQYYYIABBhhggAEGGGCAAQYY
YICB32VgM5aeBtMfiqV3Y3j4FGPYWSw9iVhn8ecliLwVS5/Dzgdi6SFA3kePY1x5jEtPryz6
XW56EnyeIsvZucM1igB8vG4Zfo/vPz6nHxZL3w2Wj3vw0bH0y23cy2ih/QH3QbH0vTm+N5Y+
nbcYTIPkfx9LD2uehOu/RSx9Z63ToHq692vvd9NnVvmc//nzp/OyBgwwwAADDDDAAAMMMMAA
AwwwwAADDDDAAAMMMMAAAwwwwAADDDDAAAMMMMAAAwwwwAADDDDAAAMMMMAAAwwwwAADDDDA
AAMMMMAAAwwwwAADDDDAAAMMMMAAAwwwwAADDDDAAAMMMMAAAwwwwAADDDDAAAMMMMAAAwww
wAADDDDAAAMMMMAAAwwwwAADDDDAAAO/zcAjwfvNWHpfr57/PBZLH6PXc3g4DYsP/65Cx3ms
ejMs3ge1hyD5+fLcnU/P3S3Gz7O/V+LXpyXI3nUbEe0spN6IUc+x9Pr+74qlN+f0jlh6uR6t
tU7ntrcXIRSfrlmMxMd5t9ZmHHfY+3j9zTB9EarfOja93mDoaPC+io0X95xC2VlQfW9tSne7
c4xr1drX7XUMppKYebQ7Pl/bsfR5D9LxZmNN9isec2QPVp+3ejzV+DNXO4bC/LYMlnuZ/7wW
fq/fX3nOm58v2/d85APYsdaSAQYYYIABBhhggAEGGGCAAQYYYIABBhhggAEGGGCAAQYYYIAB
BhhggAEGGGCAAQYYYIABBhhggAEGGGCAAQYYYIABBhhggAEGGGCAAQYYYIABBhhggAEGGGCA
AQYYYIABBhhggAEGGGCAAQYYYIABBhhggAEGGGCAAQYYYIABBhhggAEGGGCAAQYYYIABBhhg
4LsbWI2lp6H04d+PxtKzhUli6XX4eUSURsb3YuldiC33AekHYundFMTOzpmuM0fd5wj6FPue
QslhbNm9xrByHrCu55GuweNzejCW3gqbVyHt8ZrLXOpgfBjnPNdyDNO859/vnD8Hxxvr1Y/3
cn0Le5+/pjGWcfDh5zKWHve0dWwx93FeRXR7vvfKPfs9TgPq+dqU496eY+Y+eR7Gudeh7vRe
Zdh7/F00uhNL3zMQ3Dx3t0b8vAq0h3XeM/P3sfR8nRux9GkM2fgmT/frc3e9L3sT133t/dle
8/nxBffdv+CMn2EGGGCAAQYYYIABBhhggAEGGGCAAQYYYIABBhhggAEGGGCAAQYYYIABBhhg
gAEGGGCAAQYYYIABBhhggAEGGGCAAQYYYIABBhhggAEGGGCAAQYYYIABBhhggAEGGGCAAQYY
YIABBhhggAEGGGCAAQYYYIABBhhggAEGGGCAAQYYYIABBhhggAEGGGCAAQYYYODzDTRj6WUo
/cNi6bcxcp7FyWOkOQSkh5B3+hri1o0YdIyrPxRLHxYzxr7zaPYYQ59eWXh72YDsmJVQ+gA2
jb6PgGOgPN7j6JzK85YxpgHv5SFZiavPYfnh/P7efUy6GX6f170IZ2fn978L+xSPmcLZ5zHe
Pb6S8+dYerr26TqsAa/nHuZcxdJb6xsD56WbeM2VYHo5zyRi3pxbFXlfn2Mr1D56ytcxt5/u
Q74e52sfmj8cS+/HtWEgjK1pfmUPdtflfbH09bm3YukbnsrPkfNLdx/GvPb+tI9lkN6Xz+d/
+Vhja8wAAwwwwAADDDDAAAMMMMAAAwwwwAADDDDAAAMMMMAAAwwwwAADDDDAAAMMMMAAAwww
wAADDDDAAAMMMMAAAwwwwAADDDDAAAMMMMAAAwwwwAADDDDAAAMMMMAAAwwwwAADDDDAAAMM
MMAAAwwwwAADDDDAAAMMMMAAAwwwwAADDDDAAAMMMMAAAwwwwAADDPwMA1UsvRVKPxZL/xkL
8q1hZyFz+/F99rIOjP9fYx+i7ZfbV1r5urkva/wvjOEr98C9/6/nzX1YY4ABBhhggAEGGGCA
AQYYYIABBhhggAEGGGCAAQYYYIABBhhggAEGGGCAAQYYYIABBhhggAEGGGCAAQYYYIABBhhg
gAEGGGCAAQYYYIABBhhggAEGGGCAAQYYYIABBhhggAEGGGCAAQYYYIABBhhggAEGGGCAAQYY
YIABBhhggAEGGGCAAQYYYIABBhhggIGfaEAsvftJsN+66/nUna9vfd/+J83rp8/lq2Ldw32f
uuv9K9f3q+a+zPl+fepO55fu7pnxucEAAwwwwAADDDDAAAMMMMAAAwwwwAADDDDAAAMMMMAA
AwwwwAADDDDAAAMMMMAAAwwwwAADDDDAAAMMMMAAAwwwwAADDDDAAAMMMMAAAwwwwAADDDDA
AAMMMMAAAwwwwAADDDDAAAMMMMAAAwwwwAADDDDAAAMMMMAAAwwwwAADDDDAAAMMMMAAAwww
wAADDDDAwMMG/gPkqxT6pmn5/gAAAABJRU5ErkJggg==</item>
		<item item-id="27" content-encoding="gzip">H4sIAAAAAAAA/2RSzW7TQBCeXTuxnSZ1ICm0TdokJVBAAlGLC5WQ2hJVHEpbpXcq13ETI9oE
x616jHgRLjwC4s6F5+BBADM/TghirfHOfPPN3+4WAUChnKAUWDfwb4cfumE/Gl7mgNZzFKc3
DAQzGXtBtIvg6OxdGCSMQJfjNf7z48Fob3gj8AGKhUB3RnyD8hur/sgDfMd6P+2/Nq23q9KU
Bm2wcntWfDdJ4ujsKgkVM7dRXJhf5vbGP3aOE5hJHIY1BjyU0ojVvLfyDWCSs7xPuO/kbdkt
R3a7ILuz4GkskuD5aKW2AIpsfxH7GeVj4sRZ9KibnRJ1xeqkxIXKnvkLDfsWB/bK2JBxDE+h
g6Mx9LlMuSLiViSXVZXilSXZq3eYeL00LXqX7a8zG5YlsLrClfeWEVpl9eMyN1ETo8JGXcj5
NcleX5d9rSGjrk9Hbcqo67MqLQlc25BRWwjdk1FbnLgto9bvy6htvAGTRt2HXYAHMmx7Nuwm
Pxe35532Y380OD0fxhd+YnGmJXp1DHf8xJfbXM1uVVExI3u7myiPWSer4N9E433OIy+1jnKo
Mi4tPPpzwIQpfqDqi1MfvX99DL2Z52A+KkOh1YUQApQIrvEfQxOOYMSaDwmil9BH7BUM0CYs
QJS8EYzZH2SNWknsB6HXMeR2slINVQZVQy3Vjta2tNqEGxRqTSlxusWp5yXKQ9iCJ+x/BEoz
AypaKwNV7JpUk9A0baicqunJDtbJq5rBBS1VM1NSbMndUA5ycNiGKiAnJWQBORxeRA6Hl4hD
UYvMQcUlDpFlPvfw6iKMo8B/L7dh85yvUXp4ChFfn5sduwH/reK88QcAAP//AwDzgKDXpwQA
AA==</item>
		<item item-id="28">iVBORw0KGgoAAAANSUhEUgAAAcgAAAIcCAYAAABy5j5OAAAAAXNSR0IArs4c6QAAAARnQU1B
AACxjwv8YQUAAAAJcEhZcwAAEnQAABJ0Ad5mH3gAAEXrSURBVHhe7Z0NeqO6EkSzLi/I6/Fq
vBkvhvBrAwaqQAhLcDIv37uZKUCcbnXRApy/gi8IQAACEIAABL4I/MEEAhCAAAQgAIFvAhgk
WQEBCEAAAhCYIIBBkhYQgAAEIAABDJIcgAAEIAABCHgE6CA9TqggAAEIQOBiBDDIiwWc04UA
BCAAAY8ABulxQgUBCEAAAhcjgEFeLOCcLgQgAAEIeAQwSI8TKghAAAIQuBgBDPJiAed0IQAB
CEDAI4BBepxQQQACEIDAxQhgkBcLOKcLAQhAAAIeAQzS44SqR+B5/yv+/kbf9+fpGY3P+wKn
LGM6ZHIrHq9yk+e9aNg8i3ubJ7f6H/iCQF4EMMi84pXMaJvCeC9LYFMQK8OMbRivx+1zzCNJ
tOc3KPIHnfOW0zyEU3v+f4Ogv4rHrcqL1ijrwVd/1/95yxmluU0I55Bt06RxzlFhkOeMa/Sz
qg3yXRybTuGUXcKCEdYMbo/SAn789XoU9yM7tMWLgzIX+kzKsd1SYDQO0dHMjj7ej1PyLIfH
IM8SyUPPozHEtz9WRfCUBtkuEc60xoMu+lD+vYPV7A/s0NpYDzvH/smXzHq8qk4puQunnzA7
MEa/ysUTHheDPGFQo59S3UG0y6v1EtpUJ9UttzX3KodFcvhvQ/+Z2u5zL6vWdst7I2MYdrXd
8t7nXmk9hq7AG8vDzTLYfGF7G+R7n81Fw+e+XMeoi8jEuRnjacbRLl0+SvZtR/Z9T3TEaTSu
ZrlzIh5vnsP7ylPGppiMc68aYxPfz7HH1xuT5xfApRnDdI7N30deE5sR5/p4n7/r57uM0RvY
0pyIPqM5wAwBDJLUWE3gU9DagvrVYQ2XXGt9t8w26jaHHcbCdnXB6xvO1LJuv3sRY6jGUxnD
vXygZNIE54y/wzXuLqufy26pNKC+IXxMZst42jEsLGVXBfj74mPMqfq5GV9zjdDr6mpz7F0E
jH8eZIdi8mWP5TGrY3/uQw7jLc6vW579ipOxXe+ibNzFfjPbGpsP5zrHuzi9H1JqeMgYLc6J
1dOTDXYkgEHuCPMau2qKU12UB53kqEvqmeanQCzdqxwXvVFhqYrIyIi/OsZ3YVreV10wS2Mc
72/oBWLZeHwfrvq5MvD3Dckep66bmWTSGtbEeOY64s9uPqb3aURGnGpzKe2x3H/znHH/oZn+
GNs9TMZ07qJAZPz72J0BDx/YUec3F6fl7dT98DGzjbkyzsfa5MYrBl1nOVqFGGyrxnuNqpLq
WWKQqUYm1XEN7t+M7kU2l8u9jmTUZS0V36XtqrI+cS/rqzPtXcF/uqLv+4jWwzWL91W/O6nP
UmIbuD4ncW6T45liNSrCg/N/H3Z4z6++OCmfIh3cL34/NDM2h2+zGKbh8j3Zr/6xWl6tOvTu
DaD+AzvG+W3ismjwTR4NHqzaEpuZfKxzf/RAkoyRGG+qZeAq48IgrxLpnc5zPOHHV/PD5dfh
FfVgGWo0nqXtZl8VeBek4ZOTy/uqivzUlf5XeW/e4Zt4QOf7Ptz3Pvtctoxn9n7qx20+nfyn
fRy9UvHdnXxdaPTuU9b3OcW7OssPJpUGe++e6m2XnB+f92P7x9bnNx0ntd1SjnX3JftL0lti
M87H5+PzJPNwOXWiQx+99rI83p0mLbvZTACD3IzuihtOLAdN3sPqGVCvkxq/+zUw2/GV9Fen
Wu7z+WheRH+v+DXvX34eGJpZJhx3c+YLm13x7Msbg5hYMut1Dl8msnRu7TLkVPc1fo2mede0
XC6tPOfdTfbvzbam0nH6esWiXV4s//3zWsjw4kJm9fjhmU8whvdy5479ehaPMohTrwkNzm8j
l8Ucm2K2ITbNAzldPjYm+Fm86F1kGDFaHK8MBoLYBDDI2IRPsv/5B3PaZbd39zF8Gm+45OQ/
2fq9DDbR3UwsaTW458fwtRQq4qMfSGqX7fqfLPRlwBvG097j/FwAdJyHH87w/YDNh9Nst9gz
8/75+a9jjM5n4iJlvlMdj7+7wBme32ycFJdR7Kc+3OH7gwx6T++OLnQmr6W6MTSPVL8/Lejr
Yu091vFDUP1cXpoTJykeGZ8GBplx8Bh6CgSGD56kMCJ3DOOnK99maXbY7nHQQSBXAhhkrpFj
3GkQ+FpKTGNYchRzD4fMLG3K/SGAwAkJYJAnDCqndAyBwUvgKX6cmsAwfondeUjnGLIcBQJp
EMAg04gDo4AABCAAgcQIYJCJBYThQAACEIBAGgQwyDTiwCggAAEIQCAxAhhkYgFhOBCAAAQg
kAYBDDKNODAKCEAAAhBIjMC1DPLo3wOXWLAZDgQgAAEI+ASuY5BTn2rhc0IJAQhAAAIXI3Ad
g6wDO/HrgS4WcE4XAhCAAAQ8AhikxwkVBCAAAQhcjAAG2Qa8+aBhvmFADpAD5ECaOVCUNXr6
O5ZvY5A9g4wF+Sz7LcvGWU4l2nnAyEMLJ80JRh9Gc8bY/b2muU1xsYo3fw+yumLia5kAE1Zn
CIw0o0oBJ80JRhikzpJdFRhkCE4mrKYHI80Ig4SRR6BRqe4xZm9zsbYJg1yTmGMtxV/Tg5Fm
hEHCSBFwTLGvUfvb+u/XMcj6QwI+N9/HvxOWJVadQhR/GGkCnoJc0pyuyGjpIZwl09Q0tymu
Y5CCDwapE+iKE1ZTGSpg5BGDk+Z0FUZrn0wdd44xazcG2eZpTMh6KuShuMqEDYkGjDx6cNKc
zs5orTHOEYtZuzFIDFLP1I4Rr3lIVmcvahKAKYCTBnVGRnuZYp8eBqlzKVgRE3Lw4BLZwRkn
7N5oYeQRhZPmdCZGMYyxIxizdtNB0kHqmUoHCSObgCc8U/H3zni9KndGMU2RDnJ9PgVtEfMq
JGhgCW2c+4Q9AiWMPMpw0pxyZXSUMdJB6hzaTYFBapS5Tlh9ZvspYOSxhJPmlBOjo02RDlLn
z64KDFLjzGnC6rOJo4CRxxVOmlMOjH5pjHSQOod2U2CQGmUOE1afRVwFjDy+cNKcUmWUginS
Qer82VWBQWqcqU5YPfLjFDDyWMNJc0qNUWrGSAepc2g3BQapUaY2YfWIj1fAyGMOJ80pBUap
miIdpM6fXRUYpMaZwoTVo/ytAkYefzhpTr9klIMx0kHqHNpNgUFqlL+csHp0aShg5MUBTprT
0YxyMkU6SJ0/uyowSI3z6AmrR5SeAkZeTOCkOR3FKFdjpIPUObSbAoPUKI+asHok6Spg5MUG
TppTTEa5myIdpM6fXRUYpMYZc8Lqo+ehgJEXJzhpTmsZOb9A+EzGSAepc2g3BQapUa6dsHqP
51PAyIspnDQnl5H6RcJnNEU6SJ0/uyowSI3TnbB6T+dVwMiLLZw0J5fRkkFO/Zs+cl6KmLWb
3+bR5kJMyHml2/xo3Ql7lvPdch4w8qjBSXNyGLnmqI+WryJm7cYgMUh7ZjgT1t7ZSYUw8gIL
J83JYeQYpD5S3goM8oD4xYR8wPAPOYQzYQ8ZSMIHgZEXHDhpTg4jDLIoYtZuOkg6SD1TO0YF
6aJgOUVN7eMK/w4nHWWXkXpIRx8pbwUGeUD8YkI+YPiHHMKdsIcMJtGDwMgLDJw0J4eR6iD1
UfJXxKzdtAR0kPYMcSasvbOTCmHkBRZOmpNiNH7v0XkPUh81PwUGeUDMYkI+YPiHHEJN2EMG
kfhBYOQFCE6a0xKjq5rhFLWYtZsOkg5Sz9SOEfcgJSsKv0RUC+CkOc0xwhyH7DBInUvBipiQ
gweXyA4oajoQMNKMMMjtjDDHb3YxazcdJB2kN1u56rc4YZAWJjpIA9M4lzDHaWgYpJFMoZKY
kEPHlsr2FH8dCRhpRnSQ6xlhjvPMYtZuOkg6SG+20kFanDBICxMdpIGpyyXMcRkWBmkkU6gk
JuTQsaWyPcVfRwJGmhEdpM8Ic9SsYtZuOkg6SJ2BHSOeYpWsMEiJqBbASXPCHDWjOpcqUJG+
4u050oCHu30Vj1s51UpAf7dH8Vo65utR3Cpd/X0vniNtTMiHoDjgIBQ1DRlGmhEGqRlhjppR
p4hZu7M2yOf9r7g9Glt8PW7F331sex3CZ3H/uxWttNGODDUmZD/UaSsp/jo+MNKMMMhlRpij
l0MY5CKnoekVZU/YN8HBps/7yBAr7V/R91MMUiclxR9GmoCnIJemOQ0+W5VbGlYyxazd+XaQ
X6bXLLdONZHfHWOj7brP+oo24jq2FeUMRBQ1HSQYaUZ0kNocYeTlUezana1BOqb3Rtzef/yY
57RBVsWNPxCAAAQOJ1BW4nf3SBVaRyBic3MNg+zuUb4f0mke1mGJ1b9K44rWY0UHCSePwEc1
d8+RXPJIxlz9y9YgixVLrGPMPKTjJd5YxYTV3GCkGXGxpc0RRl4escQ6x6leNu2/rrHwkE5/
H1/Lrc0/xrwK8UOdtpLir+MDI82I4t/VnM+y6hQ1csnMJZZYp0H5r3m021ddZwmz/3BOt2cM
UicjExZGmoCnuHouOa9yXJ2Rl0lxm5t8l1hrenMfFND+ffeu4/tDAj7vQo7hY5A6HZmwMNIE
PMWVc8kxR7psL49ir/5lbpA+RKXEIBUhPh5ME4KRw+jKxd81xyszcnPoiNU/DLKljEHqtLzy
Vb+m0yhg5JG6Iqc15kgueXlEB+lzClJikBrfFYuapjJUwMgjdjVOa80Rg/TyCIP0OQUpMUiN
72pFTRP5VsDIo3YlTlvMEYP08giD9DkFKTFIje9KRU3TmFbAyCN3FU5bzRGD9PIIg/Q5BSkx
SI3vKkVNk5hXwMijdwVOIeaIQXp5hEH6nIKUGKTGd4WipiksK2DkETw7p1BzxCC9PMIgfU5B
SgxS4zt7UdMEtAJGmtHZi/8e5nh2Rl6WeKqYtZvXPNoYxITshTl9FcVfxwhGmtGZi/9e5nhm
Rl6G+KqYtRuDxCDtTKT4a1Qw0ozOWvz3NMezMvKyY50Kg1zHa5M6JuRNA0pwI4q/DgqMNKMz
Fv+9zfGMjLzMWK+KWbvpIOkg7Yyk+GtUMNKMzlb8Y5jj2Rh5WbFNhUFu47Zqq5iQVw0kYTHF
XwcHRprRmYp/LHM8EyMvI7arYtZuOkg6SDszKf4aFYw0o7MU/5jmeBZGXjaEqTDIMH7W1jEh
WwPIQETx10GCkWZ0huIf2xzPwMjLhHBVzNpNB0kHaWcoxV+jgpFmlHPx7xtjxF9kX0Mkl8xc
ihgIDBKD9LKQCWtxoqhZmLIs/keaIwbp5VHNCYP0YW1VxoS8dUypbUfx1xGBkWaUY/E/Ykl1
TI5cMnMJg/RAhagwSE2PCQsjTcBT5JRLvzDHHC8ivMjvr4pZu1liZYnVzticipp9UjsLYeQB
zYXTr8wRg/TyiCVWn1OQMuZVSNDAEto4l6L2S2Qw8ujnwOmX5ohBenmEQfqcgpQYpMaXQ1HT
ZxFXASOPb+qcfm2OGKSXRxikzylIiUFqfKkXNX0G8RUw8hinzCkFc8QgvTzCIH1OQUoMUuNL
uajp0R+jgJHHOVVOqZgjBunlEQbpcwpSYpAaX6pFTY/8OAWMPNYpckrJHDFIL48wSJ9TkBKD
1PhSLGp61McqYOTxTo1TauaIQXp5hEH6nIKUGKTGl1pR0yM+XgEjj3lKnFI0RwzSyyMM0ucU
pMQgNb6Uipoe7W8UMPK4p8IpVXPEIL08wiB9TkFKDFLjS6Wo6ZH+TgEjj30KnFI2RwzSyyMM
0ucUpMQgNb4Uipoe5W8VMPL4/5pT6uaIQXp5hEH6nIKUGKTG9+uipkf4ewWMvBj8klMO5ohB
enmEQfqcgpQYpMb3y6KmR5eGAkZeHH7FKRdzxCC9PMIgFzm9isetnGpl1v/dHsVrSft6FLdK
V3/fisdIjEHqhPxVUdMjS0cBIy8Wv+CUkzlikF4eYZALnJ73v+LWOt3rcSv+7s8ZdWOkA+3I
UDFInZC/KGp6VGkpYOTF42hOuZkjBunlEQY5y+lZ3Aed4Pjn/oajf3veyy7yXvTtFIPUCXl0
UdMjSk8BIy8mR3LK0RwxSC+PMMg5TpXJDbrApkucayKrbrPTV/891mGQOiGPLGp6NGkqYOTF
5ShOuZojBunlEQY5t2haLalOGGS3jPq92ed+5ZSJ1vcm+QMBCJyHQPnr4N8GeZ6z4kzGBKog
R/qKt+dIA+52W99zXGuQ93txrx/q4SGdLeE56qp/y9hS2QZGXiRic8q5c+wIxmbkRSp9VczV
v2wNsli1xFp1jx9TrJdbuQe5OvOZsBoZjDSj2MuHZzDH2Iy8KOWhwiCn4lS/ttF/0GbhIZ1a
2+8av7UxIeeRZnqUFH8YaQKeIlYuncUcMUgvj7gHucDJf82jMsTPax5190kH6Wdgq4xV1FYP
JOENYOQFJwanM5kjBunlEQa5yGnugwLav+/fo+SDAvyMm1HGKGrBg0psBzDyArI3p7OZIwbp
5REG6XMKUrLEqvHtXdT0EfNTwMiL2Z6czmiOGKSXRxikzylIiUFqfHsWNX20PBUw8uK2F6ez
miMG6eURBulzClJikBrfXkVNHylfBYy82O3B6czmiEF6eYRB+pyClBikxrdHUdNHyVsBIy9+
oZzObo4YpJdHGKTPKUiJQWp8oUVNHyF/BYy8GIZwuoI5YpBeHmGQPqcgJQap8YUUNb33cyhg
5MVxK6ermCMG6eURBulzClJikBrf1qKm93weBYy8WG7hdCVzxCC9PMIgfU5BSgxS49tS1PRe
z6WAkRfPtZyuZo4YpJdHGKTPKUiJQWp8a4ua3uP5FDDyYrrEaWyGVzRHDNLLIwzS5xSkxCA1
Poo/jDQBTzGVS30jnPpvb8/nUTHfvFjGrN35/jYPj52tignZHkTiQiasDhCMNKO57mjJIL29
nktFLnnxjFm7Mcg2BjEhe2FOX8WE1TGCkWY0ZZCqe4z4O3G9Af9ARS550GPWbgwSg/SysFQx
YTUqGGlGGOQ2Rt5W11NhkAfEPCbkA4Z/yCEo/hozjDQjDHIbI2+r66li1m46SDpIe0ZR/DUq
GGlGUwZZ/11Zjea+vb2eS0UuefHEID1OQaqYkIMGltDGTFgdDBhpRhjkdkbeltdSxazddJB0
kPZsovhrVDDSjJaWWMedpLe3c6rIJS+uGKTHKUgVE3LQwBLamAmrgwEjzWhskFf9IABFilxS
hJp/j1m76SDpIL0srBKx/MPXMgEYeRnSccIc53mRS2YuRXwHiIqHQXpZiEFanChqFqb6Ygtz
5GLLyxbBCYPcA+PvIMcf/TFHoPhrzjDSjJplsc+3t8X1VOSSF3OWWD1OQaqYkIMGltDGTFgd
DBhpRn2D9NTXVJFLXtxj1m6WWFli9bKQJVaLE0VNY+q6R628toJc8uKPQXqcglQxIQcNLKGN
mbA6GDBaZsTSqs6hTkEueaxi1m46SDpILwvpIC1OFLV5TINPyeGJaJlP5JJEVAswSI9TkCom
5KCBJbQxE1YHA0bTjL5+CTIGKZOJXJKIMEgPUbgKg9QMmbAw0gS+FVPLquSSJgkjzYgO0mMU
rMIgNUImLIw0gaFi7p4juaRJwkgzwiA9RsEqDFIjZMLCSBOYNsjxduSSJgkjzQiD9BgFqzBI
jZAJCyNN4KNYep2DXNIkYaQZYZAeo2AVBqkRMmFhpAk0CvU6B7mkScJIM8IgPUbBKgxSI2TC
wkgT0OZYFzWeYpUoYSQRtRdj8d5WjLdn79wCVa/icSvTqLxc/bs9itfC3p73Vldp2+/7s78c
lDmKQJLO5kxYTenqjFTn2BG8OiedSVxEOIzoIIXp3R6NLb4et+Kv73j97V6P4tEzw1JdGuut
aDeNfhXiBjp1HUVNR+jKjFxzpIPUeQQjjxEGOcvpWdz/+iY3/rm34es17C5Lw7yNOk6WWHVC
Xrn4azqN4qqM1pjjlTm5eQQjn1TM2p3vuuLzPlpWbZZb55rIYUN5K7rO873kE/F3ivmhTlt5
1eK/JipXZbT2A8ivyolcWkPA02KQE5zqJdVBF9gY5Nj4vjf9Xl7t2vRq0vIHAhBYSaD73Y7M
Hgj8gkDE5ibbDnKzQU4sr8Zex/aug9JXcdWvY3Q1RmuXVt8rNjzFKpPparkkgcwI6CCnwGxc
Yq2MdarLjAl5a+BT244JqyNyJUZbzZH7azqPYOQxit3cZNtBlo+tFre/e/F5OHXhIZ036+nl
1diQ/VCnrbxS8d8aiaswCjFHir+XXVfJJY/GvCpmc5OvQZa8qncbrdc8OrYzy6sYpJeiTFjN
6QqMQs0Rg9R5BCOPUezanbVBNu8zTn1QQPv3o1c55pZXY0P2Q5228grFPzQCV2C09onVKaZX
4EQuhRLwtqeD9DgFqWJCDhpYQhtT1HQwzs5oD3OkO9J5BCOPUezmJvMO0oeolBikInTdl+A1
mY/izAa5x9JqR+rMnNbky5IWRh7JmLUbg2xjEBOyF+b0VUxYHaOzMtrTHOmOdB7ByGNEB+lz
ClJikBrfWYu/PnNfcUZGe5sjxd/LpzPmknfm61QxazcdJB2knY1MWI3qbIximCMGqfMIRh4j
OkifU5Ay5lVI0MAS2vhsxT8G2jMximWOFH8v886US94Zb1PFrN10kHSQdlYyYTWqMzHa64nV
KWpn4qSzYpsCRh43DNLjFKSKCTloYAltzITVwTgLo5jmSAep8whGHiOWWH1OQUoMUuM7S/HX
Z7pdcQZGMZdWO7Jn4LQ9S7wtYWRy4rd5eKBCVBikpseEPT+jI8yR7kjnEYw8RnSQPqcgJQap
8WGQ52Z0lDlS/HUewchjhEH6nIKUGKTGh0Gel9GR5kjx13kEI48RBulzClJikBofBnleRrEf
yhmTI5fOm0v6zPZVxKzdvObRxiom5H3T4Xd7o6hp9jkyOtoc6Y50HsHIY0QH6XMKUmKQGl+O
xV+f1b6K3BgdvbTa0c6N075Z4u0NRiYnnmL1QIWoMEhNjwl7Lka/Mke6I51HMPIY0UH6nIKU
GKTGh0Geh9EvzZHir/MIRh4jDNLnFKTEIDU+DPIcjH5tjhR/nUcw8hhhkD6nICUGqfFhkPkz
SsEcKf46j2DkMcIgfU5BSgxS48Mg82f0iydWp6iRS/nnkj6DYxQxazevebQxjAn5mDSJfxSK
mmacMqNUzJHuSOcRjDxGdJA+pyAlBqnxpVz89eiPUaTKKJWl1S4KqXI6Jku8o8DI5MRrHh6o
EBUGqekxYfNklJo50h3pPIKRx4gO0ucUpMQgNT4MMj9GKZojxV/nEYw8RhikzylIiUFqfBhk
XoxSNUeKv84jGHmMMEifU5ASg9T4MMi8GKX0UM6YHLmUVy7p0f5OEbN28xRrG9eYkH+XOvse
maKmeabCKGVzpDvSeQQjjxEdpM8pSIlBanypFH890t8pUmCU8tJqF5kUOP0uS7wjw8jkxFOs
HqgQFQap6TFh02eUgznSHek8gpHHiA7S5xSkxCA1PgwybUa5mCPFX+cRjDxGGKTPKUiJQWp8
GGS6jHIyR4q/ziMYeYwwSJ9TkBKD1PgwyDQZ5WaOFH+dRzDyGGGQi5xexeNWlu2yQvzdHsXL
Yfp6FLdK/3crHr0NMEgND4NMk1HqT6xOUSOX0swlPar0FDFrd9aveTzvf8WtdbnX41b83Z/L
dlppRsbYbRATcnoptW1EFDXN7WhGOZoj3ZHOIxh5jOggZzk9i/vA7MY/jzZ83ktzvBdzFopB
6oQ8uvjrEaWnOJJRjkur7wvSIutr80MS78hcOuSEIh0kZu3ON0srwxssqzbLrdNNZPtv98ok
myXZsS4m5Eh5cfhumbAa+VGMcjZHuiOdRzDyGNFBznCql1QnDLJbch1s1naP92fTP9bbTtyD
rIobfyCQPIHysvZtkGQsBK5OgA8K+HbJNQb5ra2WY4ddJB2kvmI7qjvSI0lXEZtR7p0jS6x+
7sbOJX8kaStj1u5LLLE6ZhoTctrp5Y+OCatZxWR0FnNk+VDnEYw8RiyxznGqX9foP3Sz8JDO
1wM63/crMUidkDGLvz56HoqYjHJ9YnUqcjE55ZEpepQw0owwyAVG/mse7fuS3ZM5Xw/4VPd0
8m2mvTQKVzFhNcNYjM5kjnRHOo9g5DHCIBc5zX1QQPv3g4d4mvuOzVOs3697YJA6IWMVf33k
fBQxGJ1pabWLZAxO+WSJN1IYmZwiNje0TW0MMEidjEzY4xmd0RzpjnQewchjRAfpcwpSYpAa
HwZ5LKOzmiPFX+cRjDxGGKTPKUiJQWp8GORxjM5sjhR/nUcw8hhhkD6nICUGqfFhkMcxOttD
OWNy5NJxuaSPlLciZu3mHmSbGzEh551+n9FT1HQk92B0dnOkO9J5BCOPER2kzylIiUFqfHsU
f32UvBWhjM6+tNpFN5RT3lnijR5GJieeYvVAhagwSE2PCRuX0VXMke5I5xGMPEZ0kD6nICUG
qfFhkPEYXckcKf46j2DkMcIgfU5BSgxS48Mg4zC6mjlS/HUewchjhEH6nIKUGKTGh0Huz+iK
5kjx13kEI48RBulzClJikBofBrk/oys8sTpFjVzaP5f0Hs+piFm7ec2jzZmYkM+SlhQ1Hck1
jK5qjnRHOo9g5DGig/Q5BSkxSI1vTfHXezunwmV01aXVLuoup3NmiXdWMDI58ZqHBypEhUFq
ekzYfRhd3RzpjnQewchjRAfpcwpSYpAaHwYZzghzbBiSS+G5pPdwDUXM2s09yDaHYkI+S5pS
1HQklxhhjh9+5FJYLumtr6OIWbsxSAzSnkkUNY3KMUi9l/MryCUdYxhpRiyxeoyCVTGvQoIH
l8gOmLA6EHOMrvzE6hQ1cml7Luktr6WIWbvpIOkg7dlEUdOophixtPrNjVzalkt6q+spMMgD
Yh4T8gHDP+QQFDWNecwIc5xmRi6tzyW9xTUVMWs3HSQdpD2rKGoaVZ8R5jjPi1xal0tafV0F
BnlA7GNCPmD4hxyCoqYxd4wwx2VW5JKfS1p5bUXM2k0HSQdpzy6KmkZVMcIcPU5adW0F882L
PwbpcQpSxYQcNLCENmbC6mD0DVKrr6sgl3TsYaQZVYqYtZsOkg7Sy8IqEcs/fImlwxJRxI+G
PA1+ckmHEkaaEQbpMQpWxbwKCR5cIjtgwnrmiEHqhCWXYKQJeIqYtZuWgA7Sy0I6yEVO3He0
06gWYpCaF4w0IzpIj1GwKuZVSPDgEtkBE3Y6EH1zhJGXrHDSnGCkGSVgkM/iXlaAykD+7k9v
xBmqMEgdNCbsN6Nx5wgjnUd0kDDyCHiqmLXbWGJ9FY9Ha4zPe2OU1fftUbx643897sWj/xfe
uSWjigk5mZMMHAjFf94gu3+BkZdkcNKcYKQZJdBBfg/y9bh9jLI2zHvxLO3ycR+apnd6aagw
SB0HJuyQ0dQHkMNI5xEdJIw8Ap4qZu02OsjxIJ9lR9lvFaufH80y7Kir9E4vDVVMyGmcYfgo
KP4fhnMP5cDIyzM4aU4w0owS7CB7S67t+Kvl1dtPusdyLLfpJd8ptIPOd2TmGKRORiZsw2jp
iVUY6Tyig4SRR8BTxazdGzrIctDVvcjxAzuvR2mSxz7E87z/Fbe2m63Nb/H45cNGCx1uTMhe
mNNXUfyXzZHC7+cwuaRZwUgzSrCDbAddP7BT3XvsvqqnXfs/eye3XVUd79Z7MGj882jP5XiX
/BOD1JG4+oR13nW8OiOdRW0XzqcySVTkkkTUruhs6/OcvQfuufcKSFk9um7OOXCwpjLoQUfY
LLdOm2BvKXbGxDFIHZErT1jHHOkgdQ51iivnkksJRh6pmLXbN8hqCXXmFQ/vNPZV1UuqEwap
TLpalv0bdJ7tFW11bvyBwByB9jNWyREIQCAxAhE/29E0yNErHF/d277m5+xtq0FW+566Xxnz
KsQ5nxw0V72inXqdYy5eV2W0Nn/hpInBSDOqV21+b5DjVzvKUT0fv/1ggFVLrGPQ3w/sxITs
hTl91RUnrLu0ytLhuvy9Yi6tI8Tn1bq8YtZus4OcMMhyybX7gB33RHbV1Uu+44eE+g/tLB2t
NMjRzcqYkHc97x/u7GpFba051lezPHxiZSicNCYYaUbJdJDN57H2DOjXBlk1sate8/jAft6/
jRSD1Ml4pQm7xRwxSJ1DdNow8gl4ypi12+4g3x9Y3j2oM/HU6qv8RJ1j34Sc+6CA9u+7h3j6
DxiV45560jUmZC/M6auuYpBbzRGD9HP4KrnkE/lWwsijF7N22wY5/Hi59kGXnln+3cr3DMvv
Yw3SA+ioYkJ2jp+D5goTNsQcMUg/i6+QSz6NaSWMPIIxa7dpkGKg7w4Ng/RCmqfqChN2zROr
U1G8AqM9shdOmiKMNKP6ovT3T7F6A33eMUiPVJ6qs0/YUHOkg/Tz+uy55JOYV8LIo5iNQXqn
k6YqJuQ0z3j9qM48YUOXVjuaZ2a0PmMo/iHMyCWPXszavc8Sq3ceSatiQk76xFcM7qwTdi9z
pIP0k+msueQT0EoYaUZZLbF6p5OmCoPUcTnjhN3THDFInUN02jDyCXjKmLWbDrKNQUzIXpjT
V53NIPc2RwzSz+Gz5ZJ/5r4SRh6rmLUbg8QgvSwsVblP2LEh7vFQzhhe7ozsZAgUwkkDhJFm
xBKrxyhYFfMqJHhwiewg1wnbN8bxf++NNldGe3NQ+4OTIpT/Bak+w30UMWs3HSQdpJ2luRY1
DNIO8WHCXHPpMEAnWLE5ihUGeQDpmJAPGP4hh8ixqC2ZI0ush6TN5EFyzKWjacHIIx6zdtNB
0kF6WZjpFS0GaYf3UCHFX+OGkWbEPUiPUbAq5lVI8OAS2UGOExaDTCR5RsPIMZeOJgkjj3jM
2k0HSQfpZWGmHWRzhTn/bZ+8KaSoeaDgpDnBSDOig/QYBatiXoUEDy6RHeQ6YTHIRBKoN4xc
c+lIkjDyaMes3XSQdJBeFmbaQc6Zo33SK4UUNQ8YnDQnGGlGdJAeo2BVzKuQ4MElsoPcJmyM
T8pRociNkTqfWP8OJ00WRpoRBukxClZhkBphbhM2xmscilJujNT5xPp3OGmyMNKMMEiPUbAK
g9QIc5qwvzDHerKWf/jSBOAEI03AU8Ss3czmNgYxIXthTl+VS1H7xdJqF71cGP062+CkIwAj
zYgO0mMUrMIgNcIcJuwvzZEOUucQFxIw8gl4ypi1mw6SDtLLwkyWD3+1tErht9OoFuZwsbXu
jPZXw8hjikF6nIJUMSEHDSyhjVOfsL82Rwq/n6yp55J/JvGUMPLYxqzddJB0kF4WJn7V/+ul
VTpIO43oIE1UGKQHCoP0OAWpYkIOGlhCG6c6YVMxRzpIP1lTzSX/DOIrYeQxjlm76SDpIL0s
TLiDTGFplQ7STiM6SBMVBumBwiA9TkGqmJCDBpbQxilO2JTMkQ7ST9YUc8kf/TFKGHmcY9Zu
Okg6SC8LE+wgU1papYO004gO0kSFQXqgMEiPU5AqJuSggSW0cUoTNkVzpIP0kzWlXPJHfawS
Rh7vmLWbDpIO0svCxDrI1JZW6SDtNKKDNFFhkB4oDNLjFKSKCTloYAltnMqETdUc6SD9ZE0l
l/wRH6+Ekcc8Zu2mg6SD9LIwkQ4y1aVVOkg7jeggTVQYpAcKg5zl9CoetzKNyqr5d3sUL4tn
s839ORTHhGwNKwPRryds6uZIB+kn8a9zyR/p75Qw8tjHrN1Zd5DP+19xezS2+Hrcir+x603w
rXVlpcUgveTrq349YVNeWqWDXJdPv86ldaP9jRpGHncMcpLTs7j/3YrWH0vF+OdJdyzujycd
pJd3X6pfTtgczJEO0k+sX+aSP8rfKmHk8ccgpzg976Nl1eml08+m5b/fq2VYlli9tPtW/WrC
5rC0Sge5Lqt+lUvrRvlbNYw8/hjk3FLp4L5jY3zdkut4k+e96zbnDbJKSP4kRqC8CfA2SKID
AQhAYEygKhCRvuLtOdKAu93W9xJdgyy7zc89RzrIraH5xRVtLkurdJDrsuoXubRuhL9Xw8iL
AR1k4BJr9TBP/aTr6LvfbcaE7IU5fdXREzY3c+QepJ/DR+eSP7J0lDDyYhGzdmfbQZaPrRa3
v3v5aE73ZTykU0vpIL20+1YdOWFzuu/YJ3Uko61xTGE7OOkowEgzqi9KWWKdBrXlNQ8M0ku6
KdVREzZXc6SD9HPrqFzyR5SeEkZeTDDIWU5zHxTQ/v3khwfQQXpp97sOMsel1Y4WRc3LLjhp
TjDSjOggPUbBqphXIcGDS2QHR0zYnM2RDtJP1CNyyR9NmkoYeXGJWbvzvQfpsbNVMSHbg0hc
GHvC5ry0Sge5Lnlj59K60aSphpEXl5i1G4NsYxATshfm9FUxJ+wZzJEO0s/hmLnkjyJtJYy8
+MSs3RgkBullYamKNWHPYo4YpJ1K0XLJH0H6yljzLf0zXzdCDHIdr03qmJA3DSjBjWJN2Nzv
O/ZDFYtRgukQNCQ4aXww0ozqi1Je8/BAhahiQg4ZV0rbxpiwZzJHOkg/W2Pkkn/0PJQw8uIU
s3azxMoSq5eFEZZYz7S02kGkqHnpBCfNCUaaER2kxyhYFfMqJHhwiexgzwl7RnOkg/QTdc9c
8o+alxJGXrxi1m46SDpILwt37iDPtrRKB2mnUS2k+GteMNKM6CA9RsGqmFchwYNLZAd7Tdiz
miOF30/UvXLJP2J+Shh5MYtZu+kg6SC9LNzpqv+sS6t0kHYa0UGaqDBIDxQG6XEKUsWEHDSw
hDYOnbBnN0c6SD9ZQ3PJP1K+Shh5sYtZu+kg6SC9LNyhgzzz0iodpJ1GdJAmKgzSA4VBepyC
VDEhBw0soY1DJuwVzJEO0k/WkFzyj5K3EkZe/GLWbjpIOkgvCwM6yCssrdJB2mlEB2miwiA9
UBikxylIFRNy0MAS2njLhL2SOdJB+sm6JZf8vZ9DCSMvjjFrNx0kHaSXhRs7yKssrdJB2mlE
B2miwiA9UBikxylIFRNy0MAS2njthL2aOdJB+sm6Npf8PZ9HCSMvljFrNx0kHaSXhSs7yKst
rdJB2mlEB2miwiA9UBikxylIFRNy0MAS2tidsFc1RzpIP1ndXPL3eD4ljLyYxqzddJB0kF4W
ruggr7i0SgdppxEdpIkKg/RAYZAepyBVTMhBA0toY2fCXtkc6SD9ZHVyyd/bOZUw8uIas3bT
QdJBellodJBXXlqlg7TTiA7SRIVBeqAwSI9TkCom5KCBJbTx0oTFHJtAUdS8hIWT5gQjzaie
c1XxifQVb8+RBhxrtzEhxxrz0ft1DPLoMaV2PIqaFxE4aU4w0owwSI9RsAqD1AjnJuzV7zv2
yVHUdB7RacPII+CpYtZuOsg2BjEhe2FOXzVV/FlaHcYNg/TyGE6aE4w0IzpIj1GwCoPUCMcT
FnP8ZkZR03lEBwkjj4Cnilm76SDpIL0sLFVzBmnv4AJCDNILMpw0JxhpRnSQHqNgVcyrkODB
JbKD/oTlvuN0UChqXrLCSXOCkWaEQXqMglUYpEbYTViWVudZUdR0HrHECiOPgKeKWbtZYmWJ
1cvCdokVc1zGhUF66QQnzQlGmhEd5CKjV/G4lWlUVu2/26N4LWlfj+JW6arv+/NLGfMqxAtz
+qpqwrK0ikHukakUf00RRpoRBrnA6Hn/K26PxhZfj9uk8TWbP4v720DL/y6r/NgjMUidjJij
wai8iOBLE6D4w0gT8BQxa3fGs7kyulvR+mNjgoOfe3Bfr0F3WRkrBuklX6diadXjReGHk0dA
q8glzYgOco7R8z5aVm2WWydWT4d7qLZjidXLvFaFOfq4KGoeKzhpTjDSjDDIGUb1kurgvmNj
kN2S69RmVee4dA+yvsfGn28C5TpDbZL8gQAEIJAaAT6s/NvuthhkvZf2YZ2xkcZcx/aug9JU
9e87ckWrYwQjzai+6uderQQFI4moFsSs3fneg9y6xFp75Lj7jAvZC3N6qvHSKhNWxwhGmhEG
CSOPgKfCIKc41Z3gvXw0p/taeEhnvP3EfciYkL0wp6Wauu9I8dcxgpFmhEHCyCPgqWLW7nw7
yJKd/5pHH/T0wzwxIXthTkc191AOxV/HCEaaEQYJI4+Ap4pZu7M2yHKxdOaDAtq/7x7iqTrG
7kMCJt6BrCdsxBu9XpjTUc2970jx1zGCkWaEQcLII+CpYtbuzA3SA+ioYkJ2jp+KZunDACj+
Okow0owwSBh5BDxVzNqNQbYxiAnZC/PvVep9R4q/jhGMNCMMEkYeAU8Vs3ZjkBhkTUCZI0XN
nKy8vmCB4kJCY4KRZtTUrng2Fm/P3rklo4oJOZmTXBiI8zmrTFgdSRhpRlxswcgj4Kli1m4M
kg7S/g0dFH89YWGkGWGQMPIIeCoM0uMUpIoJOWhgkTd2lla7IVD8dTBgpBlhkDDyCHiqmLWb
DvLCHeQac6SomZOVe5AWKC4kNCYYaUZ1XeIepAcqRBUTcsi4Ym7r3HfsH58Jq6MBI82Iiy0Y
eQQ8VczaTQd50Q5yrTlS1MzJSgdpgeJCQmOCkWZEB+kxClbFvAoJHtzOO1i7tNodngmrAwEj
zYiLLRh5BDxVzNpNB3mxDnKrOVLUzMlKB2mB4kJCY4KRZkQH6TEKVsW8Cgke3I472LK0Sgfp
B4Ci5rGCk+YEI80Ig/QYBauuYJAh5kgH6aUYRQ1OHgGtIpc0IwzSYxSsOrtBhiyt0kH66UVR
81jBSXOCkWaEQXqMglVnNsg9zJEO0ksxihqcPAJaRS5pRhikxyhYdQWDDIXEhNUEYaQZcbEF
I4+Ap4pZu3mKtY1BTMhemOOoQu879kdF8dcxgpFmhEHCyCPgqWLWbgzyxAa519Jql6YUfz1h
YaQZYZAw8gh4KgzS4xSkigk5aGAbN97bHClqXiAwSDh5BLSKXNKM6rrEZ7F6oEJUMSGHjGvr
tnsurdJB+lGgqHms4KQ5wUgzwiA9RsGqMxlkDHOkg/RSjKIGJ4+AVpFLmhEG6TEKVp3FIGMs
rdJB+ulFUfNYwUlzgpFmhEF6jIJVZzDImOZIB+mlGEUNTh4BrSKXNCMM0mMUrDqTQQbDmNkB
E1aThZFmxMUWjDwCnipm7eY1jzYGMSF7YQ5Txbrv2B8VxV/HCEaaEQYJI4+Ap4pZuzHIExhk
7KXVLk0p/nrCwkgzwiBh5BHwVBikxylIFRNy0MAmNu4b4lHmSFHzoohBwskjoFXkkmZU1yXe
g/RAhahiQg4Z12CJs+z3f2WOGKQXRYoanDwCWkUuaUYYpMcoWIVBaoRMWBhpAp6CXNKcYKQZ
YZAeo2BV6gY51zmyxBoc+l13QFHzcMJJc4KRZoRBeoyCVRikRsiEhZEm4CnIJc0JRpoRBukx
ClZhkBohExZGmoCnIJc0JxhpRhjkIqNX8biVaVSuM/7dHsVrSfu8N7oZbeoG2SQCD+l4U+Z3
Koqaxx5OmhOMNCMMcoHR8/5X3B6NLb4et+Lv/pxWvx7F7f1vz+JemeRIi0HqZGTCwkgT8BTk
kuYEI80Ig5xlVBndrWj9sVSNf/5s+Ho+B91lbaajjjMHg5zqIr0U2kfFhNUcYaQZ1Xlc/uFr
mQCMvAyJWbvzzdJqyXRgcs1y61wTOUBdbZtxB+mlzf4qJqxmCiPNCIOEkUfAU2GQE5y+u8DG
ILsl1yW01dLs2Ejre5Op/+nuQaY+TsYHAQhA4CgCfJLOt91tNsjB/cjPfmNehXjXQWK5pTXH
Pfa1dR90R5ocjDQjOkgYeQQ8VczafbEl1qrLvJd3K7+/YkL2woxB7sHp1/vAIL0IwElzgpFm
VF9s0UFOrrEWt7++2c0/pNNt/bz3H+oZ7jMmZC/M86ojfpWVM0YmrKYEI82IDhJGHgFPFbN2
59tBluzs1zxKbbUkO7jvWD6o0/85JmQvzBhkKKcUtscgvSjASXOCkWZEB7nIaO6DAtq/b59y
rYz0/SEB3YcFDLrPuG26F+ZpVSrdI1f9XhQpanDyCGgVuaQZYZAeo2BVqh0kBhkc2kN3QFHz
cMNJc4KRZoRBeoyCVSkaZErmSAfppRhFDU4eAa0ilzQjDNJjFKzCIDVCJiyMNAFPQS5pTjDS
jDBIj1GwCoPUCJmwMNIEPAW5pDnBSDPCID1GwarUDDK15VWWWL0Uo6jBySOgVeSSZoRBeoyC
VRikRsiEhZEm4CnIJc0JRpoRBukxClalZJApdo90kF6KUdTg5BHQKnJJM8IgPUbBKgxSI2TC
wkgT8BTkkuYEI80Ig/QYBatSMchUu0c6SC/FKGpw8ghoFbmkGWGQHqNgFQapETJhYaQJeApy
SXOCkWaEQXqMglUpGGTK3SMdpJdiFDU4eQS0ilzSjDBIj1GwCoPUCJmwMNIEPAW5pDnBSDPC
ID1GwapfG2Tq3SMdpJdiFDU4eQS0ilzSjDBIj1GwCoPUCJmwMNIEPAW5pDnBSDPCID1Gwapf
GmQO3SMdpJdiFDU4eQS0ilzSjDBIj1GwCoPUCJmwMNIEPAW5pDnBSDPCID1GwapfGWQu3SMd
pJdiFDU4eQS0ilzSjDBIj1GwCoPUCJmwMNIEPAW5pDnBSDPCID1GwSoMUiNkwsJIE/AU5JLm
BCPNCIP0GAWrfmGQOS2vssTqpRhFDU4eAa0ilzQjDNJjFKzCIDVCJiyMNAFPQS5pTjDSjDBI
j1Gw6miDzK17pIP0UoyiBiePgFaRS5oRBukxClZhkBohExZGmoCnIJc0JxhpRhikxyhYdaRB
5tg90kF6KUZRg5NHQKvIJc0Ig/QYBaswSI2QCQsjTcBTkEuaE4w0IwzSYxSsOsogc+0e6SC9
FKOowckjoFXkkmaEQXqMglUYpEbIhIWRJuApyCXNCUaaEQbpMQpWHWGQOXePdJBeilHU4OQR
0CpySTPCID1GwSoMUiNkwsJIE/AU5JLmBCPNCIP0GAWrYhtk7t0jHaSXYhQ1OHkEtIpc0oww
SI9RsAqD1AiZsDDSBDwFuaQ5wUgzwiA9RsGqmAZ5hu6RDtJLMYoanDwCWkUuaUYY5CKjV/G4
lWlUOtDf7VG8FM/Xo7j93YrHhBCDVPCKggkLI03AU5BLmhOMNCMMcoHR8/5X3Fq3ez1uxd/9
Oa9+3hsjxSC9rJtQMWE1OhhpRqxGwMgj4KmiNjfeEFJUPYv7wOzGP0+NeV4TC/JZllcpat4c
wCDh5BHQKnJJM6KDnGNUdYSDZdVmuXWpiSwKDNJLuWkVE1bTg5FmxMUWjDwCnipWc9PkaaZf
9ZLqhEF2S67Tp7VskFVx2/VPSbfuIPkDAQhAAAJxCFRFNtJXvD1HGnC32xgGufeQz7S8ylW/
lx10kHDyCGgVuaQZscSa6RLr2cwRgzQna76LMt4J7qSi+GuQMNKMMMg5RvUrG/fyrmL3ldZD
Ohikl9xnU1HUvIjCSXOCkWaEQS4wWvWaR72fYx7SOaM50kGak5UO0gJF8deYYKQZYZCLjOY+
KKD9+/5DPHXH2X6oQPn/46dd93wSCoP0EvuMKoqaF1U4aU4w0owwSI9RsCrUIDtTPKs50kF6
KUZRg5NHQKvIJc0Ig/QYBau2GuTYGPs/Bw8qsR0wYXVAYKQZcbEFI4+Ap9pau529Z/uah3Ny
azRbIWOQayifX4tBejGGk+YEI82IDtJjFKzaYpBL5njGpVYmrE4zGGlGdJAw8gh4qi2129tz
xp+k456gq9sCGYN06V5Hh0F6sYaT5gQjzYgO0mMUrMIgNUImLIw0AU9BLmlOMNKMMEiPUbBq
i0E2wZn/Dh5UYjtgwuqAwEgzYokVRh4BT7W1djt75yGdltJWyBikk2bX0WCQXqzhpDnBSDOi
g/QYBav2NMjgwSS6AyasDgyMNCM6SBh5BDzV1trt7J0OcqcO0oGdu4biryMII80Ig4SRR8BT
YZAepyDVFshnfJVjCSLFX6cYjDQjDBJGHgFPtaV2e3vmNY83py2QMUg3za6jwyC9WMNJc4KR
ZlRfbPELkz1QIaq1kK9mjlz1e9lFUYOTR0CryCXNCIP0GAWrMEiNkAkLI03AU5BLmhOMNCMM
0mMUrFpjkFfsHukgvRSjqMHJI6BV5JJmhEF6jIJVGKRGyISFkSbgKcglzQlGmhEG6TEKVrkG
edXukQ7SSzGKGpw8AlpFLmlGGKTHKFiFQWqETFgYaQKeglzSnGCkGWGQHqNglWOQV+4e6SC9
FKOowckjoFXkkmaEQXqMglUYpEbIhIWRJuApyCXNCUaaEQbpMQpWKYO8evdIB+mlGEUNTh4B
rSKXNCMM0mMUrMIgNUImLIw0AU9BLmlOMNKMMEiPUbBqySDpHhu8TFidZjDSjMglGHkEPJVq
bry9TKv4bR4tFwxSpxHFH0aagKcglzQnGGlGdJAeo2DVnEHSPX7QMmF1msFIM6KDhJFHwFPR
QXqcglR9yJ0p9v8/aOcn2ZjirwMJI80Ig4SRR8BTYZAepyBVBXnKGOkg6SDXJBYG6dGCk+YE
I82IJVaPUbAKg9QImbAw0gQ8BbmkOcFIM8IgPUbBqqXukS6ywcuE1WkGI82IXIKRR8BTscTq
cQpSYZAaH8UfRpqApyCXNCcYaUZ0kB6jYBUGqREyYWGkCXgKcklzgpFmhEF6jIJVyiCDD3CC
HTBhdRBhpBmxxAojj4CnYonV4yRUr+Jxq55ULb9vj+I1UmOQGjLFH0aagKcglzQnGGlGdJAe
I6l63v+K26OxxdfjVvzdn4NtMEiJkId0NCIYGYzoID1IGKTJqSrekb7i7TnSgLft9lnc/25F
64/lLsY/l09oliTmvrcd83xbMWF1TGGkGWGQMPIIeCqWWD1O86rnfbSs2iy39ptIDFJDpvjD
SBPwFOSS5gQjzai+2KKD9EDNqeol1cF9x8YguyXXBvLUd3vPsv6UHb5hQA6QA+RAijkQ5hDz
W19iidUxyFiA2S8EIAABCORJ4BIGWRhLrHmGj1FDAAIQgEAsAtcwyNejuP3dy0dzuq/vh3Ri
AWa/EIAABCCQJ4FrGGQZG/WaR57hY9QQgAAEIBCLwGUMsnz7cfGDAmIBZr8QgAAEIJAngQsZ
ZJ4BYtQQgAAEIPAbAhjkb7hzVAhAAAIQSJwABpl4gBgeBCAAAQj8hgAGOeDOfcphGq7gUb1K
032YwsSHwf8mvY846gpG7+F8f5LTESP97TE2cKqfPq9ezO9/TORvzyLu0VcwerO5Ep+49Kf2
jkH2qPCk6zBFbB7VZH1/bl/1Ck05aUcfBn98ah9zRJtRbzj1B1eUjC6CqD7ztZwaRlcxxiY5
fEbDTwL7/iCUY3L/CkfBIN9R1h9ofoWE+Jyjz+P1fA5+fdh1JqzP6NM8Por74/n1WcDnzq2V
nOrViP57y+em09qj/IUKs3PzkryOyQkMsuPMp+2M20f5Ae+zKVqxvEJ7tDpnyiv/e/W7SC+2
xLqKU8vm/lmyv0Iqrf20r6rb7D5fuvrvSzA6xhMHR8EgWxx8Xusw+0J4XGXCrmX0vHdLhtcy
yFWc2m7oXq5KVF9XWWpdxagh836vG3OM55wYJAY5mV3rJ+wbZO9+ZLzETWHPqxiVhf9TyDDI
8W/T6eL5zbS5p312E1iVS51Bll32vfytRFe7V3vk3McgWWKdzrdVy2Lv8lZe1V7o3tEKRvWS
2MSvTOv/yrUjJ/6hx1rBab1RHHom8Q62glHTPX4eYGpy60LzLl4UvvaMQX4uXflA8356bPiA
988S4oEZ/MtDbWDUDPdaHWS5TurPra8HTi7Cag2jWtt/wpdfvhCrDGCQPbL+Y9axwpHWftfw
qK78B8tggyXFtM5rz9GsYfQ57kWK/qa51d5b65Lpq7PaM3pp7cvPpWbZ+b36wFOs0QKJQQ7Q
rnhRN1pIUtrxHI/279sPBJhePrzKko/HaBjV6xnk/C8LGOZSw6l9l7Zekr5KHn1WFuql+MGH
bUww4oMCDimUGOQhmDkIBCAAAQjkRgCDzC1ijBcCEIAABA4hgEEegpmDQAACEIBAbgQwyNwi
xnghAAEIQOAQAhjkIZg5CAQgAAEI5EYAg8wtYowXAhCAAAQOIYBBHoKZg0AAAhCAQG4EMMjc
IsZ4IQABCEDgEAIY5CGYOQgEIAABCORGAIPMLWKMFwIQgAAEDiGAQR6CmYNAAAIQgEBuBDDI
3CLGeCEAAQhA4BACGOQhmDkIBCAAAQjkRgCDzC1ijBcCEIAABA4hgEEegpmDQAACEIBAbgQw
yNwixnghAAEIQOAQAhjkIZg5CAQgAAEI5EYAg8wtYowXAhCAAAQOIYBBHoKZg0AAAhCAQG4E
MMjcIsZ4IbCVwOtR3P7+ir+/W/F4bd0J20HgOgQwyOvEmjM9IYHnvTK88feEAdbmeC+eJYNq
mxsOecJs4JT2JoBB7k2U/UHgYAK1Sd4eRdcUjn+uhlP93b1yR74gAAGbAAZpo0IIgRQJvIrH
bdQRPu/DZdT656Z75AsCEPAJYJA+K5QQSI9AvXQ6XFJ9PW5vQxwswfa6zK6rbJZnS/OsTJQW
M734MqKfEsAgf4qfg0MgjEBthn3jq7vFYUf5fc9x3HU+i3u5Df4YFgu2Ph8BDPJ8MeWMLkOg
MbrhQzrjB3QaTd/8pg2TJ1svkzacqE0Ag7RRIYRAYgQmlle/Rth7erX+t+rn0VLr5N8ldqoM
BwK/IIBB/oI6x4TADgS+llcn9jnWVD8PX/GYeMhnh7GxCwicgQAGeYYocg4XJOAZ23g5dfhz
c++x+eCAV1H+jy8IQKBHAIMkHSCQG4H2QZzu3uP8S/+VAY7uLb4/Tad9erV8+eNjkrmBYLwQ
iEsAg4zLl71D4HcEeHXjd+w58ikIYJCnCCMnAYGWwPuhnInuEUgQgMAqAhjkKlyIIZA6AZZM
U48Q48uHAAaZT6wYKQQgAAEIHEgAgzwQNoeCAAQgAIF8CGCQ+cSKkUIAAhCAwIEEMMgDYXMo
CEAAAhDIhwAGmU+sGCkEIAABCBxIAIM8EDaHggAEIACBfAhgkPnEipFCAAIQgMCBBDDIA2Fz
KAhAAAIQyIcABplPrBgpBCAAAQgcSACDPBA2h4IABCAAgXwIYJD5xIqRQgACEIDAgQQwyANh
H3qo9681Gv26o0MHMXOw99ju5S9b4gsCEIBAmgQwyDTjMjmq6pfddr8D8PP/Ewb4/o0ORTH+
hbl7n649pvGB+VVMe4eC/UEAAjsTwCB3Bhp7d7Uh3R5F98vfxz9Xx6/+7n5ga+aMaczl9bgd
OsbYcWH/EIDA+QhgkCKmfyWh7luFP5b2c9xX8bj9FYPfIF//dvleF1n/fOTSpTGmL3DVr2Q6
cowqcvw7BCAAgW8CGORMVvTNbvzf401iab+GVi+dDpdUq06sM8TBcmevy+y6ymZZtjSmueXN
2lz7HWr7uwVH+xqMS4yp037GtnB8ZigEIACBhAhgkBkZZG2GfbNqDa3fUX7fcxx3eI3pzS/B
VvrKhL0uT4+pOf7f+4Dq+AnNDoYCAQhcmgAGORH+pY4w9r/NZ2NrNHUX2H2PH9BpNH3zmzbM
5Sdb+13p8uzQY9py/EvPSE4eAhBIhgAGmYtBTixlTi/B9u7tVduMl0en/m68I0dTbaPGVHW4
4+NP/V0y04GBQAACEPgQwCA3GmS3mdNRbtF+e9ZoeXVi3OPlzurnwQM95bOvXw/5TOznWW03
utc5NWm+lldHoq+nadv3H4djYjpCAAIQSJMABjkTl1gP3qzZ72doprGVr3fM349sH7ipje9V
lP+b/Opev3ibW9nxTd+v1GMaLK/WnWO5r+r+5rM8fprzgVFBAAIQeBPAIFM3yO7J0va+43z3
VRng6N7i+xNr2qdXy8+tqR7QGbwW0p5/95Tpe//dcafc0R1T//j1frqnYstlYBySMgQBCCRO
AIMUAYr1buOa/Vo5xCfTWJgQQQACEHAJYJAuqRR174+Um+geUxwvY4IABCCQEQEMMqNgfQ91
fsk069Ni8BCAAAQSIIBBJhAEhgABCEAAAukRwCDTiwkjggAEIACBBAhgkAkEgSFAAAIQgEB6
BDDI9GLCiCAAAQhAIAECGGQCQWAIEIAABCCQHgEMMr2YMCIIQAACEEiAAAaZQBAYAgQgAAEI
pEfgH69s14RJZefVAAAAAElFTkSuQmCC</item>
		<item item-id="29" content-encoding="gzip">H4sIAAAAAAAA/2RTzW7TQBCe3XX81/y2KUnqQJJCaCgSooYLPaVVVTiUEoUHqNzEbYNIE1wX
9RjxIlx4AxB3xBvwGJy5IjM744Qg1hrvzOdvv5lZjbMAINBeo7nkK3zb4bt+eD6aXGZAr6do
znAyYMwg7JmmjQevTt+Eg5gQ6NN5iW/z6mK6P7lh+AjNQqC/IL5Mk/00AX5gdtP5G+v1q8ZF
SZCKnNVF8r04jkan13EoiLmLVoDlZexu/hNnSMCIozD0CPDRclNyTb/2DWCWsfyPuHdNm3fL
4d12eXdWfIlJYixRCrEDkKX4C8ePtR4RZ07e19V0c7oqcmc5SlT03e8Y2CXf+I3fi6skMCxh
eUYPHsEh7AGsEfippFVHeKhM5Flxncll7EJp8gHALaaW51SACldgVbnkSo336gYx39fmpXoU
f13EUOeD1dtU734doTvkfqiTcIODCgVNJpstVm9u8t66y1nw5g2hfKwRL/keZ2JsB7EnKNBm
gdZ9vqg2Qlt8UW1K0OGemw+4544u87OCbe63s+j3IY1ZYeifnEfB9OLkbBKNg9gijXU9rQQf
BHHAU7CRToNo0VjxeG2hbZOvIze4GV0dkg5PuO7/WKRcGqXnEMAYHxRN8AFRz8+/6/F1e3CG
35polzDEvYfvOfNoWSlF56mtOAoGoX+g6JOXEhuiCMITyJMZKRWLC4EQHpdKSqn1hSQA1qQU
iuiJdg2NJklDZIQnZ10UM4WnSNUSnpFox2aphnCQg/U0hIucRCMryKHjWeTQ8Zzm6FN54qBT
0BxN5iYKx9fjMBoNgrd8iTY18wJtCCN8VPqr6ptS8N/KLgd/AAAA//8DAO0jj66WBAAA</item>
		<item item-id="30">iVBORw0KGgoAAAANSUhEUgAAAcgAAAIcCAYAAABy5j5OAAAAAXNSR0IArs4c6QAAAARnQU1B
AACxjwv8YQUAAAAJcEhZcwAAEnQAABJ0Ad5mH3gAAEy/SURBVHhe7Z0Nmpu6EkRnXV6Q1+PV
eDOzGAewmWAMrgKpQYIzefneTdIS0uluFS3+fh78QAACEIAABCDwQeAHJhCAAAQgAAEIfBJA
IIkKCEAAAhCAwAQBBJKwgAAEIAABCCCQxAAEIAABCEDAI0AF6XHCCgIQgAAETkYAgTyZw5ku
BCAAAQh4BBBIjxNWEIAABCBwMgII5MkcznQhAAEIQMAjgEB6nLCCAAQgAIGTEUAgT+ZwpgsB
CEAAAh4BBNLjhBUEIAABCJyMAAJ5MoczXQhAAAIQ8AicSyB/b4/Lz+Vx+/XgYAUBCEAAAucl
cB6BvF8fPz8/zW8E8rzhzswhAAEI+ATOI5Adk/vjikD60YElBCAAgRMTQCBP7HymDgEIQAAC
8wQQyBeb5/br3r8fozG0f871e83cGjivAQzZ/P+78XjXHIM2+8cdPsAHdcdAlMgjkAOBjILs
9ttq0fAnnzjmEtnB6LqTCXdm57FrqJxnsgkzhZOGByPNqLVoT26ifuJ6jhpxUr/z1yAjIbtD
7vw852xHkGYUNUJon4Hpzuw8dixqnq/hpDnBSDNCID1GplUlAjlTSmYXJKGcf4L9t836WYma
4E9jxqLmuRpOmhOMNCME0mNkWpUvkKraMyeaxexDkGeEMsvBDtIJi5rnSDhpTjDSjBBIj5G2
6l4S8P9C9PX+3qSELVY9iW0txlu+XcIikl+dwKLmxSicNCcYaUYIpMco2QqB/ESoqtmpf092
ROUdsKh5DoST5gQjzQiB9BglWyGQAuEXNUQo/7NjUfNSEU6aE4w0IwTSY5RshUBqhH8J2yvi
qMlYKHWPx7NgUfN8CifNCUaaEQLpMUq2QiA1wreEnRHJZ8C+/9Y9H8eCRc3zJZw0JxhpRgik
xyjZCoHUCF2BPLNIsqjpOOrigxcqSFAwkog6g8i1m0e9Xz6IhOy5uXyrj4T9UkX2szlbNcmi
5sUxnDQnGGlGCKTHKNkKgdQIZwVSvMHgTDfxsKjpOKKChJFHwLOKXLupIKkgvSic2xYzqsgz
VZMIpBdOcNKcYKQZUUF6jJKtIs9CkgdXSAezCbtAJJ8BfdybeFjUvGCFk+YEI80IgfQYJVsh
kBphLoGcEsns75nV0wmxYFHzsMJJc4KRZoRAeoySrRBIjfBrwi6sIo+67cqipuOoW9S4i1WC
gpFE1BlErt1cg3z5IBKy5+byrSIE8mhCyaLmxTGcNCcYaUYIpMco2QqB1Ahlwq6sIo8kkpKR
xnwKCzhpN8NIM0IgPUbJVgikRigTNlEgjyCUkpHGfAoLOGk3w0gzQiA9RslWCKRGaCVskEjW
chOPxUijPrwFnLSLYaQZIZAeo2QrBFIjtBI2k0DOVZPOJ7j0TOIsLEZxh6+mZzhpV8FIM0Ig
PUbJVgikRmgnbGaRfCaB9+zk3pWmzUjjPrQFnLR7YaQZIZAeo2QrBFIjtBN2qGa6W9vCEUkE
0sa5q6EdS7uOct+Dw8jjH7l285jHyweRkD03l2+1KGEDqsipSnIsiAhk+XHU+ZHnIKWjYCQR
dQaRazcCiUB6UbhmUQsQyV4A54pUBNJ2566GLP4aP4w0IwTSY5RsFXkWkjy4QjpYnLCBAtkj
GR8CgSwkWMQwFsdSHdPKOkoYeTgj124qSCpILwrXVJDDPVH7KN8Np7ZUh3+HQGYCHdwNi78G
DCPNiArSY5RsFXkWkjy4QjpYlbCZq8gpARweAoEsJFioIJMdsSrfko9aXweRazcVJBWknRGr
EzajSPIcpO2uog1Xx1LRs8o7OBh5PBFIj1OSVSTkpIEV1Hh1wmYUyDkcGxzC8sRqRlbvxzGC
k/YljDQjtlg9RslWCKRGmJSwwQoW3L2G0+9E8PiCxSoplqwj1G8EI8+HkWs3W6xssXpR2Fgl
JWzQywOGgy9BJJMY2Z6o3xBO2ocw0oyoID1GyVaRZyHJgyukg+SEDVaw4O4tLyQzso5SvxGc
tA9hpBkhkB6jZCsEUiPMkrDBKhbcvYSUhZE8Sv0GcNI+hJFmhEB6jJKtEEiNMEvCBitYcPcS
UhZG8ij1G8BJ+xBGmhEC6TFKtkIgNcJsCRusYsHdfwWVjZF2R9UWcNLug5FmhEB6jJKtEEiN
MFvCBitYcPcIpA4VaZEtluSR6jWAkee7yLW78rtYfx+3SxNGzYr4c7k9fr/x/L09Lq1d9/v6
uI9sIyF7bi7fKmvCBqtYcPezzsrKqPyQWD1COGl0MNKMqCC/MLpffx6X21MWf2+Xx891LHt9
4/vj+nN5vEyftiNBRSB1MGZN2GAFC+4egdThQqUNo0QCXvPItbviCvJd9B5NTTgUwTe09+tI
EFvbn8dQTyMhe24u3yqrQD5P/Z6/g36Cu58cdXZGQWz27hZO2gMw0oyoIOcYfYjec7t1qoj8
rBiftn31GQ3Zc3P5VtkTNvjlAQhkuTGVPZbKnerqkcHIQxdZ3MSdvntzW23liN5f56/rj//F
c1og24Dk17YE+ioy7KivIjWsfyIGAhDYl0DkLtRqhdq54SKBbMba2f/dpPO8WYct1mVODDuj
DSz1Artmi3VZ+LxZh8VSwphKawojzyNUkFOcFmyxjptzk44XeGOrsIQNVrHg7ln4V4RTWCyt
GEupTWDkeQaBnOLUbZsOH9f4cpPOsP3HduvzHyMhe24u3yo0YQNVLLDrD6eFMio/ROwRwkmj
gpFmFL12V3sNsgXjP+bxAt1Wnc1qObw5p3cBAqmDMTRhg1UsuPs/eKGMtIuqsYCTdhWMNCME
8iujuRcFvP6+f9bx7yUB/5+F/Ng+DLzQ67m5fKvwhA1UscCu3xwXzqj8MLFGCCeNCUaaEQLp
MUq2ooLUCMMTNljFgrvvAIYz0m6qwgJO2k0w0owQSI9RshUCqRFukrCBKhbYNVusOnyotGG0
kIBnHrl2V30N0sPnWUVC9kZQvtWmAhm05R0tkpswKj9U5AjhJBGxG6ERPXdtgtaK544QP+GQ
j4J4s0UtUMUCu37GESllhTucNCYYaUYIpMco2SryLCR5cIV0sGnCBilZULd/HtqUUSFxsWYY
cNLUYKQZIZAeo2QrBFIj3DRhA5UssGsqSB1GVNowMgl4ZpFrN1usLx9EQvbcXL7VpgL5PDUM
+dpHULcs/AtCePNYWjC2Ukxh5Hkicu1GIBFILwpbvdr6+lqgkkV1vTkj23tlGcJJ+wNGmhFb
rB6jZKvIs5DkwRXSwS4JG6RkQd1ufxJRSGwsHcYusbR0kDvbw8hzQOTaTQVJBelF4R4VZOA2
a1TXLGpeOMFJc4KRZkQF6TFKtoo8C0keXCEd7JawQeVeRLe7MSokRtxhwEmTgpFmhEB6jJKt
EEiNcLeEjVCyv52DvPcB7cZIu68oCzhpd8BIM0IgPUbJVgikRrhrwgaJZO5ud2WkXViMBZy0
K2CkGSGQHqNkKwRSI9w1YXslC3itVE6R3JWRdmExFnDSroCRZoRAeoySrRBIjXD3hM2pZIPp
5ux2d0bajUVYwEm7AUaaEQLpMUq2QiA1wiISNqeaBYhkEYy0K3e3gJN2AYw0IwTSY5RshUBq
hEUkLAKpHVWBRRGxVDgnGHkOily7eQ7y5YNIyJ6by7cqJmELFsliGBUeTnDSDoKRZkQF6TFK
tkIgNcJiEnZ4w05GsczRVTGMtDt3tYCTxg8jzQiB9BglWyGQGmExCTt1R2sOdWsQpHZTDCPt
zl0t4KTxw0gzQiA9RslWCKRGWEzCzj3ykeEREARSx0EOi2JiKcdkgvqAkQc2cu3mGiTXIL0o
bKurrb/mMTWyoQhOqdnOIlkEI9uj+xnCSbOHkWZEBekxSraKPAtJHlwhHRSRsAhkIdGQNowi
YiltCuGtYeQhjly7qSCpIL0oLLGCfJ4+vr9MNUMFOdWtC4lFzSMFJ80JRpoRFaTHKNkq8iwk
eXCFdFBMws5VkZnEEYGMD7hiYil+qquPACMPXeTaTQVJBelFYSkV5FzVmHp3zQSFNV2yqHnh
BCfNCUaaERWkxyjZKvIsJHlwhXRQXMKOn4fMzAmBzAx00F1xsRQ31dU9w8hDF7l2U0FSQXpR
WFIFOTXiNWpmzHxptyxqBtTSY8mbQrgVseQhRiA9TklWkZCTBlZQ46ITdqmSmVyXdls0I3PO
W5jBSVOGkWbEFqvHKNkKgdQIi07YpUqmp9tZLO22aEbmnLcwg5OmDCPNCIH0GCVbIZAaYfEJ
u1TN9JQXi2TxjMw5R5vBSROGkWaEQHqMkq0QSI2w+IRFILUTC7EoPpYK4AQjzwmRa3flN+n8
Pm6XJoyahfHncnv8fuP5e3tcWrvu9+VxGxlHQvbcXL5VFQm7s0hWwaiAUIOTdgKMNCMqyC+M
7tefx+WldL+3y+Pnep+xfgrpm+1IUBFIHYxVJCwCqR1ZgEUVsbQzJxh5DohcuyuuIO+P61sl
OP7zEO7o3+7Xpoq8PoZyGgnZc3P5VlUkbJBAPs9U399qN+WxKhgVEGpw0k6AkWZEBTnHqBW5
tyrwWSXOFZFttdnbt/89tkMgdTBWk7COkunpflg43VbDaMX8czaBk6YJI80IgZzbNG23VCcE
st9G/Wz2/3rllIh21yb5dQgCfakX4s9XFRnS9yHoQwYCGxPI+A7msW5Uu8XaXXNcKpDX6+Pa
3dTDTTreudm7VVVntE65twKC6rYqRivmn6sJnDRJGGlGVJBZtljb6vG/KHbbrVyD9KJvYFVV
wiolWzz7/w2+dV0VowQGqU3hpAnCSDNCIOcYdY9tDG+0+XKTTmc7rBo/bbkGqYOxuoQNEkkE
UseKsqgultSEAv4dRh7UyLW72i3WFp3/mEcriP8f82gaUkF6sfdmVV3CBgnk86x1+o7W6hit
iIMcTeCkKcJIM6KC/Mpo7kUBr78fXqPkRQFetH2xqi5hEchkn0d1UF0sRYE4Ur7twAiB3Ah6
ZJm+0RTCD1PloraxSFbJKDxyPg8AJw0dRpoRAukxSrZCIDXCKhMWgdSO3cGiyljamBOMPOCR
a3fV1yA9fJ5VJGRvBOVbVZuwG4pktYw2Dj84aeAw0oyoID1GyVYIpEZYbcIikNq5G1tUG0sb
coKRBzty7aaCfPkgErLn5vKtqk3YQIF8nsH+v6O1WkYbhx+cNHAYaUZUkB6jZCsEUiOsOmED
RRKB1LEztqg6lpZPd1ULGHnYItduKkgqSC8K20qp+VXtT6BADqvIqhlt6Fw4adgw0oyoID1G
yVaRZyHJgyukg+oTNlAk+66rZ7RRrMFJg4aRZoRAeoySrRBIjbD6hA0SyD9x7L/0MfH/mu65
LKqPpQ3cBSMPcuTaXfGemQfPtYqE7I6hdLtDJGyASPZf25l9/RxZ9hHah4il4ISFkQc4cu0m
dbkG6UVh7dcg+1kGCuTwWuQQauDn6mzflWbI4q89AiPNiC1Wj1GyVeRZSPLgCungEAmLQBYR
TYeIpWCSMPIAR67dVJBUkF4UHqWCnCvzbAqfhsMKcUp/qSAnmNV8R3RCrCxpikB6tBBIj1OS
VSTkpIEV1PgwCZu5inwTyPZhmNGnsBBIBHJNGh8m39ZMfkGbyLWbCpIK0g7FQyVsRpFEIO0Q
+jM8VCwtn77VAkYWpuaENE7G4nr25laMVSTkYiaZOJBDJSwCmRgNac0PFUtpKGZbw8gDG7l2
I5BUkF4UNlaHStjMAqmehbQhn8TwULEU5DMYeWARSI9TklUk5KSBFdT4cAmbUSR7N/WMArou
KBLSh3K4WEpH8tEDjDyokWs3FSQVpBeFR6sg21kHqBgC6YUTi7/mBCPN6JnGcTIW17M3t2Ks
IiEXM8nEgRwyYTOL5JBR5q4TvVdW80PGUmbEMPKARq7dCCQVpBeFR6wgA6pIBNILJxZ/zQlG
mhEVpMco2SryLCR5cIV0cNiEzVjqIZBesB42lrzpW1YwsjCxxephSrNCIDW/wyYsAqmdn9ni
sLGUkROMPJiRazdbrGyxelF41C3WzNus40Uto/bafqrBkMVfewlGmhFbrB6jZKvIs5DkwRXS
waETNpOSIZBesB46ljwE0gpGElFnELl2U0FSQXpReOQKMmMViUB64cTirznBSDNCID1GyVaR
ZyHJgyukg8MnbIYqcopRhm4LiYB8wzh8LGVABSMPYuTaTQVJBelF4dEryExVJALphROLv+YE
I82ICtJjlGwVeRaSPLhCOjh8wmYo9RBIL1gPH0sehq9WMPIgRq7dVJBUkF4UnqGCzFBFzi1q
GbTX9lMNhiz+2ksw0oyoID1GyVaRZyHJgyukg1MkbKKSIZBesJ4iljwUs1Yw8gBGrt1UkFSQ
XhSepYJMrCIRSC+cWPw1JxhpRlSQXxn9Pm6XJoyas/6fy+3x+8X2fn3Ztbav39f7/waRZyGe
m8u3Ok3CJlSRCKQXx6eJJQ/HpBWMPHiRa3fVFWQrepfbUxZ/b5fHz1Dxhmx/b4/bQAwb60ZY
L49X084yErLn5vKtTpWwK0XyG6OVXZYfGCtGeKpYWsGnW5OaX/xoApFrd8UeuD+uP0ORG/95
APb39726bATzMqo4IyFrF9dhcaqEXalmCKQXy6eKJQ/JhxWMPHCRa3e9Anm/jrZVn9utc0Xk
e0F5+as8+7+PhOy5uXyrUyUsAhkakKeKpZUkYeSBi1y7qxXIbkv1rQp8CmS/5TqP9nN7td9i
bQOSXxDoCTT77u3ee96YeHaZt096g8CZCbQJFfQT13PQgPtuVwvkxPZqL5DBQ66++9Od0a6o
IhWjFV1WHzdTE1CcDjnphZOCkQeMCnKK08ot1lZYp6rMSMiem8u3OmXCLlQ0xWhhd+UHxcoR
Kk4ruz1UMxh57oxcu6utIJvbVh+Xn+vj/82pX27S+eM8vb1KBWkG4hnvqluoaGpRW9id55gK
rRSnCqeUfcgw8pAikDOc7Mc8/u/Lfty92v9TJGTPzeVbnTJhFyqaw2hhl+UHxooROpxWdHuo
JjDy3Bm5dtdbQXbs5l4U8Pr70aMcc9urVJBmIJ6xgnwGx/O38eMsagu6M45Yp4nDqc6Z5Rs1
jDyWCKTHKckqEnLSwApqfNqEXaBoDqMF3RXk/bxDcTjlPWJ9vcHI81nk2u2dFnvjrNoqEnLV
YAaDP3XCmqrmMjK7O0rofMzD5XRYAMbEYGRA6jZ44mQsrmdvbsVYRUIuZpKJAzl1wpqK5jIy
u0v0WLnNXU7lziB+ZDDyGEeu3QjkyweRkD03l291+oQ1VM1lZHRVfkAkjNDllHCI6pvCyHNh
5NqNQCKQXhS2WxlnvUmnJ2So2hJGRne2b2ozXMKptrnlGi+MPJIIpMcpySoSctLACmp8+oQ1
FG0JI6O7gryfdyhLOOU9cj29wcjzVeTaTQVJBelFIRXkk5NQtSWLGgJph94pDZfE0ikBbbB2
I5AbQD5K8JKwCGSuWCaWNEkYaUbPc9Y4GYvr2ZtbMVaRkIuZZOJASNi/s6nZFwcsZXTWKnIp
p8TQrbI5jDy3Ra7dCCQVpBeFbLH+5/RF1ZYuagikHX6nM1waS6cDtMHajUBuAPkogUvCUkHm
imViSZOEkWbEFqvHKNkqskxPHlwhHZCwA0fMlH5rGJ2xilzDqZA02GwYMPJQR67dVJBUkF4U
ssX6zgmBtONmypDFX+ODkWZEBekxSraKPAtJHlwhHZCwI0dMiOQaRlSQhQR4YcNYE0uFTWGT
4USu3VSQVJB2EJOwMQL5PAu2v6hl+6tkQ2JJewdGmhEVpMco2SryLCR5cIV0QMJOOGKkbGsZ
IZCFBHlBw1gbSwVNYZOhRK7dVJBUkHYQk7AIpB0swpBY0iRhpBlRQXqMkq0iz0KSB1dIByQs
ApkrFIklTRJGmhEC6TFKtkIgNUISdobRYH80hdGZtllTOOlIPYYFjDw/Rq7dbLGyxepFYWNF
wiKQdrCwxZqMinzzECKQHqckq0jISQMrqDEJ+8UZr/IvhREVZEHBXsBQUmKpgOFvNoTItZsK
kgrSDmQSNlYgn9dTzvG4B7Gk0w5GmhHXID1GyVaRZyHJgyukAxIWgcwVisSSJgkjzQiB9Bgl
WyGQGiEJqy6svcq/hDIwoal2YEEWxJJ2Bow0IwTSY5RshUBqhCSsriC7PdL+Z4XarWiiHVeg
BbGknQIjzQiB9BglWyGQGiEJKwTyma3vFxFXfO38DCJJLJFvmoBnEbl2c5POyweRkD03l2/F
ojbjI1U1LhRJBLL8XNhihOSbRzly7UYgEUgvCtviqPnFzwQBBHJxWBBLGhmMNCO2WD1GyVaR
ZyHJgyukAxJWV5AdI7ZZZcQSSxIRJ6QaUWcRuXZTElBBmmFIBfkV1KuK/BDIhdur/TGOvs2K
QOq0g5FmhEB6jJKtIs9CkgdXSAck7BdHDN+k06tbgsolNC0kWr4Pg1jSboKRZoRAeoySrRBI
jZCE1Yz+tlczKFyGLowB72NCLGnuMNKMEMivjH4ft0sTRs1K8nO5PX4dnr+3x6W1/7k8boMG
CKSGR8IuYJRB3TJ0oQe8kwWxpMHDSDNCIL8wul9/HpeXyv3eLo+f6/27nLY2I2HsGyCQOhhJ
2AWMMqhbhi70gHeyIJY0eBhpRgjkLKP74/omduM/jxrer404Xh9zEopA6mAkYRcySlS4xOZ6
sDtaEEsaPow0IwRyjlEreG/bqs/t1uki8vVv11Ykn1uyYzsEUgcjCbuQUQaFy9CFHvQOFsSS
hg4jzQiBnGHUbalOCGS/5frW7FU9Xu/P+rFrO3ENsg1IfkEgF4H+hp2k/vrHKolMCEBgmsDK
R6kc+a32OcglAvlp227HvleRVJA6XDijXcEosQRMbK4HvJMFsaTBw0gzooLMsMXqiCkCqYOR
hF3BKIPCZehCD3xjC2JJA4eRZoRAzjHqHtcY3nTz5Sadjxt0Pq9XIpA6GEnYFYwyqFuGLvTA
N7YgljRwGGlGCOQXRv5jHq/nJfs7cz5u8Il9n5/n5vKtSFjtow9GGdQtQxd64BtbEEsaOIw0
IwTyK6O5FwW8/v7tJp7ndcfnXayfj3tQQepgJGFXMsqgcBm60IPf0IJY0rBhpBkhkB6jZCsE
UiMkYVcyyqBuGbrQg9/QgljSsGGkGRUgkIPKS7ypxptOmVYIpPYLCbuSUQZ1y9CFHvyGFsSS
hg0jzagAgWy2K2+v9890N7u8tilH7z79vV3f3m3qTa0cKwRS+4KETWCUqHCJzfXAN7YgljRw
GGlGBQjk5yCfD9r31/P6a3qNkF7NF4Z7897UCoHUuEnYBEYZFC5DF3oCG1kQSxo0jDSjAgXy
3lSUw+9mtH++PW+Acb+o4c17UysEUuMmYRMYZVC3DF3oCWxkQSxp0DDSjAoUyMGW62v87fbq
peLqMRqy5+byrUhY7aOvjBIVLrG5HvyGFsSShg0jzSh67V73qrn2WuT4hp32wf2Kb+KhgtTB
SMImMsqgcBm60JPYwIJY0pBhpBmVKZDtqD7eTtPe7Tr/OSlvqvtZIZCaPQmbyCiDumXoQk9i
AwtiSUOGkWZUrkB2Yx8+fP//48XetMqyQiC1P0jYDIwSFS6xuZ7ARhbEkgYNI82oHIHs3n06
/YiHN42yrRBI7R8SNgOjRIVLbK4nsJEFsaRBw0gzKkQgR49wTLzL1JtKuVYIpPYNCZuBUQaF
y9CFnkiwBbGkAcNIMypEIMePdrS7q7eqXwwwRo9A6mAkYTMwyqBuGbrQEwm2IJY0YBhpRuUK
ZLPl2r9gx5tG2VYIpPYPCZuJUaLCJTbXk9jAgljSkGGkGRUjkM8vYVz+V40IpOe9A1mRsNqZ
FqMMCpehCz2ZQAuLU+Dxa+gaRp6XIosb8znI97tV+9fMXd7eqPN4/DZv1Hm9tdWbWUFWkZAL
mmbSUEhYjc9ilEHdMnShJxNoYXEKPH4NXcPI81Lk2m0L5Pvr5VoxHL2P9XJ9XJvfCKTn1Bqt
SFjtNZtRosIlNtcTCbawOQWPo+TuYeR5pwCBFAP9ewQEgfRcWqcVCav9ZjPKoHAZutATCrKw
OQUdv4ZuYeR5qXyBfM3jfkUgPZfWaUXCar/ZjDKoW4Yu9ISCLGxOQcevoVsYeV6qRiC96ZRp
FQm5zBkvHxUJq5ktYpSocInN9WQCLRZxChxHyV3DyPNO5NptXoP0BlqzVSTkmrkMx07Cak8u
YpSocInN9WQCLRZxChxHyV3DyPNO5NqNQL58EAnZc3P5ViSs9tEiRhkULkMXelIBFos4BRy/
hi5h5Hkpcu1GIBFILwobKxJWo1rMKFHhEpvrCQVZLOYUNI6Su4WR552dBXLwDGTF33tUqCMh
q2PX8u8krPbUYkaJCpfYXE8oyGIxp6BxlNwtjDzvRK7dRgXZvKi8f6dc9w3Ixm3t78vt8TsY
/+/tWvW7WSMhe24u34qE1T5azCiDwmXoQk8ss8ViTpmPX0N3MPK8FLl2GwL5OciPlwR0H0oe
ffHDm1sxVpGQi5lk4kBIWA1wMaMM6pahCz2xzBaLOWU+fg3dwcjzUuTavUIgx1/2aP98e3Tv
ah1Vld70yrCKhFzGDNNHQcJqhqsYJSpcYnM9qQCLVZwCxlFylzDyvBO5dq8QyMGW62v87fbq
5fq+5epNrRyrSMjlzDJtJCSs5reKUQaFy9CFnlxGi1WcMh6/hq5g5Hkpcu1eIZDNoNtrkeMb
dtrXzVV8E08kZM/N5VuRsNpHqxhlULcMXejJZbRYxSnj8WvoCkaelyLX7nUC2Y67u2Fn+Gq5
9m5XXjXnubROKxJW+201o0SFS2yuJ5bZYjWnzOMouTsYed4pUyC7sb9/Bmv8+StvemVYRUIu
Y4bpoyBhNcPVjBIVLrG5nlhmi9WcMo+j5O5g5Hkncu1eX0F6Y6/GKhJyNRDEQElY7cnVjDIo
XIYu9AQzWazmlOn4NXQDI89LkWv3OoF8PQ85vOTIc5CeM2u2ImG195IYJSpcYnM9uYwWSZwy
jqPkrmDkeacwgeyvNb5vr17vezwH2Rzz0oSR+YjJ2/Obo0dSIiF7bi7fioTVPkpilKhwic31
5DJaJHHKOI6Su4KR553ItXtVBflZLfZiue1NOvfrz6O/7tmJ39e7aJsxfnlOMxKy5+byrUhY
7aMkRhkULkMXepIZLJI4ZTh+DV3AyPNS5Nq9SiAf7VtzLpedXy3XivJwDOM/j+A228Lf9DMS
sufm8q1IWO2jJEYZ1C1DF3qSGSySOGU4fg1dwMjzUuTavUIgX9Vi82KAdntztztX2+ugbxXh
c7t1WgQHW7Ezj6JEQvbcXL4VCat9lMwoUeESm+sJZrJI5pRpHCV3AyPPO5Fr9wqBfL1JZ/ji
8iYrt35HQLelOiGQSrDbbdmft8rz6YTuOia/ILAzgSYQ22BcP4pn8/XtaQmB2gi0AR/0k63n
p/Bsdw1yrUC2HKeuV0aehQT5bvNuOaPVyJMZZSgBM3ShJ5pokcwp8fg1NIeR56XItTubQHpT
yWi1aIt1fNzPG3YiIWec9a5dkbAafxZGiQqX2FxPMoNFFk4ZxlFyFzDyvBO5dq8QyNf1vPEd
oeImGG+qC6zad79+vOrOvXGoEcjRnnAk5AWzKtqUhNXuycIoUeESm+tJZrDIwinDOEruAkae
dyLX7hUC2Q76/RnIdoCt3tybz14NP6LsTW+91bLHPP4f5379FNJIyOtnWFZLElb7IwujDAqX
oQs92QSLLJwSjl9DUxh5Xopcu1cI5OdLyVthvLXXIDf/HuTciwJGVW5XbbbXSJ+/p24oioTs
ubl8KxJW+ygbo0SFS2yuJ5pokY1T4jhKbg4jzzuRa/cKgfz8HmRz10v3EH5TRFb7Ewm5Wiij
gZOw2pPZGCUqXGJzPdFEi2ycEsdRcnMYed6JXLtXCGS7wzrxPch223XrZz08fpZVJGRrABUY
kbDaSdkYZVC4DF3oCa+0yMZp5fFraAYjz0uRa/c6gWzH3T0HOX6TzXaPeXjofKtIyP4oyrYk
YbV/sjJKVLjE5nqyCRZZOSWMo+SmMPK8E7l2rxfIbuzDN9Q07qSC9DxaqRUJqx2XlVGiwiU2
15NNsMjKKWEcJTeFkeedggXSm0ANVpGQa5i/M0YSVlPKyihR4RKb68kmWGTllDCOkpvCyPNO
5NqdWEF6E6jBKhJyDfN3xkjCakpZGWVQuAxd6EmvsMjKacXxa2gCI89LkWs3AvnyQSRkz83l
W5Gw2kfZGSUqXGJzPeGVFtk5rRxHyc1g5Hkncu1GIBFILwobKxJWo8rOaKXC9c2+/b+eTZxF
dk5xQ92tZxh56BFIj1OSVSTkpIEV1JiE1c7IzihBIPvRTnXR/t2eP9k57TmZoGPDyAMbuXav
SJNC3sXqsbOtIiHbgyjckITVDgphtEIkhwKIQGq/lWgREkslTjRxTJFr9wqBbGdTxrtYE7m+
NY+EnHOce/ZFwmr6IYwQSA3+gBYhsXREToHbISsEsqR3sebzNgKpWZKwOzFCIDX4A1qQb55T
I9duQyCfW6qXW/+dDt7F6rnteFYkrPZpGKOFIjk+qR43Dzzp1pAaizBO1tHrMIKR56edBfL+
uP2J42vAvIvV89zBrEhY7dAwRgikhn8wi7BYOhqnwLM9o4JsX7s68Y5V3sV6sDDT0yFhd2SU
KJDtyIddBK4pGhIVJIwsAp7RzhVkO8jXTTnd9x6HFSXvYvVceAwrBFL7MZTRApHkOUjtq9It
QmOp9MkvGF8BAjnYWm0yrx3Q/2uSC2ZSsGkk5IKnvWhoJKzGFcpogUBOjTSxuZ78AotQTgvG
UbIpjDzvRK7d1hbr2zDbjyM31yR/b5dOKPvfFX/Io5teJGTPzeVbkbDaR6GMMihchi40BMMi
lJNx/BpMYOR5KXLtXi6Qb1us/QQGW63dNmx9P5GQ66MxPWISVnsylFEGdcvQhYZgWIRyMo5f
gwmMPC9Frt0rBFIMuqkwL00W1lZRRkL23Fy+FQmrfRTOKFHhEptrAKZFOCdzHCWbwcjzTuTa
7QvkS/i6LVWjSrzf6qokIyF7bi7fioTVPgpnlEHhMnShQQiLcE7JI9y/Axh5Pohcu02BbLZQ
rwPBax/x+CKS3fVJQ0S96W9jFQl5mxnEH4WE1YzDGWVQtwxdaBAIJIySCXgdRK7dpkBOvSzg
9hi/P8CbTplWkZDLnPHyUYUv/suHVFyLTRglKlxi8yzMN+GUZaT7dQIjj33k2r1eIJst19vd
m0ANVpGQa5i/M0YSVlPahFEGhcvQhYbxxWITTkkj3L8xjDwfRK7dtkBeu0c6Lv+rRgTS896B
rEhY7cxNGGVQtwxdaBgIJIySCHiNCxLI/889Tr0s4Le5MafWojISsufm8q02WfzLx/B1hJsx
SlS4xObJXtqMU/JI9+sARh77yLXbriDHLywfvyjg53J9XJvfCKTn1BqtSFjttc0YZVC4DF1o
IDMWm3FaPcL9G8LI80EBAikG+vcICALpubROKxJW+20zRhnULUMXGggCCaPVBLyG5Qvkax6T
X/3w5ri7VSTk3SeXaQCbLf6ZxrtHN5sxyqBuGbpYjXgzTqtHuH9DGHk+iFy7zS1Wb6A1W0VC
rpnLcOwkrPbkpowyKFyGLjSUCYtNOa0a4f6NYOT5IHLtRiBfPoiE7Lm5fCsSVvtoU0YZ1C1D
FxoKAgmjVQS8RpFrNwKJQHpR2FhtuvjboyrLcFNGGdQtQxerHLApp1Uj3L8RjDwfIJCznNZ8
ReTZZvwy9UjInpvLtyJhtY82Z5RB4TJ0ocGMLDbntHiE+zeAkeeDyLW76gryfv3/4ebusRPj
EyL94ykIpBd8QysSVjPbnFEGdcvQhQaDQMJoMQGvAQI5yen+uA7f7NM8gfn+54lG3ceem/fK
UkF6kceitphTjQLZTnJrkdyc02JP7t8ARp4PEMgpTh9fFJneOv3ftP8iCVusXth9WpGwmtwu
jDKoW4YuNJyBxS6cFo1wf2MYeT5AICeLwfEntZ7Cd5n5xMj92r9Hdl4g24DkFwRqI9CXf0nj
bi62dCLJLwjURqAN3KCfuJ6DBtx3+/nNyS8C2VSb/685UkGudQ1ntJrcLowylX+ZutGQ2i3d
5hc/3wnAyIsQKsjELdb2Zp4W4vj3sNqMhOy5uXwrElb7aDdGGdQtQxca0MtiN072CPc3hJHn
g8i1u97TuO79r8N3vxo36XS8qSC9sPu0ImE1ud0YZVC3DF1oQAgkjGwCniECOcNpzWMeCKQX
dFNWuy3+64e8ecvdGGVSt0zdSO67cZIjK8cARp4vEMhZTnMvCnj9/eXW1IvjHypIL+yoINdw
2m1Ry6RsmbqR6HbjJEdWjgGMPF8gkB6nJKtIyEkDK6gxCaudsSujDOqWoQsNqbHYlZM1wv2N
YOT5IHLtrvcapMfOtoqEbA+icEMSVjtoV0aZ1C1TN19h7cpJu7EICxh5bohcuxHIlw8iIXtu
Lt+KhNU+2pVRJmXL1A0CqcMFRomM2uaRazcCiUDaIbrr4m+Pcl/D3RllULcMXUgn7M5JjnB/
Axh5PkAgPU5JVpGQkwZWUGMSVjtjd0aZ1C1TN7PAduekXbm7BYw8F0Su3VSQVJBeFLZbGbz9
RLLanVEmZcvUDQIpI2beYPdYShj7lk0RyA1oR0LeYPibHIKE1ZiLYJRB3TJ08RVWEZy0O3e1
gJGHP3LtpoKkgvSikArS4lTEopZJ3TJ1M8mtCE6WR/czgpHHHoH0OCVZRUJOGlhBjUlY7Ywi
GGVStkzdIJA6bGC0klHbLHLtpoKkgrRDs4jF3x7tPobFMMqgbhm6mHVCMZz2CRPrqDCyMCGQ
HqY0q8izkLSRldOahNW+KIZRJnXL1M0HuGI4aZfuZgEjD33k2k0FSQXpRWG7lcFdrJJVMYwy
KVumbhBIGTmfBsXE0oqxb9kEgdyAdiTkDYa/ySFIWI25GEYZlS1jV38Ai+GkXbqbBYw89JFr
NxUkFaQXhVSQFqeiFrVMypapmzd+RXGyPLu9EYw85gikxynJKhJy0sAKakzCamcUxSiTsmXq
BoHU4QOjhYxa88i1mwqSCtIOyaIWf3vU2xoWxSijsmXsqnNIUZy2DRH7aDDyUCGQHqckq0jI
SQMrqDEJq51RHKNMypapmz+AxXHSrt3cAkYe8si1mwqSCtKLQs76LU7FLWqZlC1TNwikFUVP
o+JiacHYtzRFIDegHQl5g+FvcggSVmMujlGvbBkULkMXCKQOIRgtYNSdSLSBGfQT13PQgKO6
jYQcNeat+y1u8d8agHG8ohhNiWOCyiU0/SBXFCfDr3uYwMijHrl2I5AvH0RC9txcvhUJq31U
FKP+zHqsbCvPuBFI7f+cFkXFUs6JZe4rcu1GIBFIO1xJWI2qGEZDEZxStp1FshhO2qW7WcDI
Q49AepySrCIhJw2soMYkrHZGMYwQSO2swi2KiaXSOa082XOmRQVJBenESWdDwmpUxTAaLxqF
bbMWw0m7dDcLGHnoI4sbBBKB9KIQgbQ4FbWozVWRiWfcOa5FFsXJ8uz2RjDymCOQHqckq0jI
SQMrqDEJq51RFKOpqjGDumXogt0IHUowMhh1O1uJJ3zfDkMFSQVphiFbrA6oogSyH3DGZyGf
C9Lzd8pPkZxSJhTQFkYeVATS45RkFQk5aWAFNSZhtTOKZpRD2f5OKNNEsmhO2s2bWMDIwxy5
dieeB3oTqMEqEnIN83fGSMJqSsUzyiSSqd0Uz0m7OtwCRh7iyLUbgWSL1YvCdmut+cXPdwLF
M0pVNirIzVKg+FjajITIudT9/i/ds+IhkHaYk7AaVRWMChDJKjhpd4dawMjDSwXpcUqyioSc
NLCCGpOw2hlVMEIgtSMLsKgilkrgRAU554Xfx+3ShFED6Odye/x+c9bv7XFp7drf1/uHJQKp
I52EPQijTALZ0ljbFbF0kFjS0wi3iFy7q95ivV9/HpfbUxZ/b5dJ4Xt65/64/glo899NVo81
MhJyeIRsdAAWNQ26GkZrlW2EYG031XDSLg+zgJGHNnLtrlggW6G7PF76+BTBtz8P4P7+vlWX
rbAikF7wDa1IWM2sGkZrlQ2B1EGQyaKaWMo037XdIJBT5O7X0bbqc7t1Yvf0vXXbji3WVbFI
wmpsVTHaUSSr4qTdHmIBIw8rAjnBqdtSfbvu+BTIfst1WlO/X4NsA5JfEDgLgf4CYvJ8X2/W
Se6H7IPAGgLcpPMpd2sEsuvldbPOWEgjz0K886DyrTij1T6qihEVpHbojhZVxdKenBDICfpr
t1g7jRxXn7EvvN0xdrIemoTVOKtjtJNIVsdJuz67BYw8pJHFTb036XSV4LW5Naf/+XKTzpjz
xHXISMiem8u3ImG1j6pjhEBqp+5kUV0s7cWJCnKavP+Yx7D99M08CKSObhL2oIwyiOTSLoil
g8aSnlZ2i8i1u94KssM896KA19/3N/G0FWP/koCJZyDbniIhZ4+InTpkUdPgq2S0VN1mMCzp
pkpO2v1ZLWDk4YxcuysXSA+gYxUJ2Tl+DTYkrPZSlYyWKNsXBEu6qZKTdn9WCxh5OCPXbgTy
5YNIyJ6by7ciYbWPqmW0RN2oIHUgZLCoNpYyzH1JF5FrNwKJQNqxSMJqVNUyyiCQz0sV3oeU
q+WkQyCbBYw8lAikxynJKhJy0sAKakzCamdUzchVtwzbrFVz0mGQxQJGHsbItZsKkgrSi8K2
OuCDyZJV1YwQSOnfLQ2qjqUNQSGQG8COhLzB8Dc5BAmrMVfNKINAutusVXPSYZDFAkYexsi1
mwqSCtKLQipIi1P1i1oGkXS6qJ6TFQ1pRjDy+CGQHqckq0jISQMrqDEJq51RPSNH3QQGp4vq
OelQSLaAkYcwcu2mgqSC9KKQCtLidIhFzVG4RJE8BCcrItYbwchjh0B6nJKsIiEnDaygxiSs
dsYhGCGQ2tEbWBwilrbgxLtY4ykjkJoxCXsSRhkEsiX1rRti6SSxpKeZbBG5drPFyharHaAs
ahrVYRhlEEkEUsfLN4vDxFIaBtkagZSI0g0iIaeProweSFjth8MwQiC1s4MtDhNL0ZzYYg0m
3G0HUUwryiSsInSwlykEiiSxdLJY0tNdbRG5dqMKbLHagcmiplEdihECqR0eaHGoWIrkFFjc
IJAIpB26JKxGdShGCKR2eKDFoWIpkhMCGUgXgbThkrAa1eEYBYnk4Tjp0FhsASMPGVusHqck
q0jISQMrqDEJq51xOEYIpHZ6kMXhYimKExVkENlBtwikZkzCnpRRokhONSeWThpLetqLLSLX
bq5BssVqBySLmkZ1SEaJAtlSG3dxSE46PBZZwMjDhUB6nJKsIiEnDaygxiSsdsYhGSGQ2vEB
FoeMpQhObLEGUB11iUBqxiTsiRkliiQVpI6dsQX55jGLXLvZYmWL1YvCdpus+cXPdwKHZZQo
kONt1sNyypggMPJgIpAepySrSMhJAyuoMQmrnXFoRokiOWx+aE46TCwLGFmYQt+CRklABelF
IRWkxenQixoCacVALqNDx1IuSO26xDXIjDRnuoqEHD/6bY5AwmrOh2aUKJDDbdZDc9JhYlnA
yMKEQHqY0qwQSM2PhIXR1488fsHTa+u3/9d0z2VBvnn+jly72WJli9WLQrZYLU6HX9RWVpH9
LtifQI5u+ArcJbP8VqLR4WMpE3QEMhPIb91EQt5g+JscgoTVmE/BaIVIDgVw8s06nKp/BNcp
YkmnlLSIXLsJSypIGYC9AQmrUZ2CEQKpAyGDxSliKQenwO0HBBKBtEOUhNWoTsEok0COq0pN
91wWp4ilDC6lgswAUXURCVkdu5Z/J2G1p07DaKFIjk/yP96sw6k6W6w6vSYtItfuysPy93G7
NEtSk20/l9vj9xvg+/VpN2MbCXml34trdprFP4H8aRilCmT7XqZm9RnevJOA/ZBNTxNLid6L
XLurFsj79edxuT1l8fd2efxc79Oof2+Py9+/3R/XViRHtpGQE/1fTHMSVrviVIwWiORHBTkQ
yAXdaAccyOJUsZTgt8i1u2KBbIXu8njpY4N3/Of/xH/v97fqshPTUcUZCTnB90U1JWG1O07F
aIGy8Rykjp2xxaliaTmevxaRa3e9Atlumb6J3HO7da6IfOPftqWCXBySJKxGdipGCwTy2+Kf
0I12SMUWp4qlBD8hkBPwPqvAp0D2W67feLdbs2Mh7a5N8gsCEFhEoL+QmJQ7r2uRSX0sGjVH
OhQBHvP4lLvVAvl2PfJ/v5FnIQknR0U15YxWu+N0jFaWf2NOK7vRDqnY4nSxtNJXkWv3ybZY
2yrz2lyt/PyJhLzS78U1I2G1S07JaIW6zQlkYDGgnVeYxSljaYUPItfuegWyrQR/hmI3f5NO
z/x+Hd7U8+6JSMgrfF5kExJWu+WUjDIIZEt2RTfaIRVbnDKWVvgrcu2uVyAbkPZjHo1tuyX7
dt2xuVFn+OdIyCt8XmQTEla75ZSMVijbHKcVXWmnVGpxylha4avItbtqgWxkb+ZFAa+/f93l
2grp30sC+pcFvFWfsR/dXOHzIpuQsNotp2W0UNmUQLLV2qxJoy+e6Og7pwUCuYHfIyFvMPxN
DkHCasynZZRJINlq/R9jp40lnWZvFpFrd+UV5EKSX8wjIecb5b49kbCa/6kZLRBJxWlBV9op
lVooRpVOK/uwI9duBPLlrkjI2SNipw5JWA3+1IwWqJriNHzzjqZ+TAvF6JizXj6ryLUbgUQg
7YgkYTWqUzPKKJBstXINUmfb0wKBdEkl2EVCThhWUU1Pvfibnjg9I1MkXU5md6Z36jJzGdU1
q/yjjVy7qSCpIO2IJWE1qtMzMhXN5WR2px1ToYXLqMKpZR0yApkV53RnkZA3GP4mhyBhNWYY
dXte/z/0OINsCSejO+2YCi2WMKpwetmGHLl2U0FSQdqBSsJqVDCKE8izPRtJLOl8ay0QSI9T
klUk5KSBFdSYhNXOgFF+gXwugrIo1c6pzIJY8hwWuXZTQVJBelHYLlK82UOygtFfQn1VtDWc
ziaSaxjJAD2gAQK5gVMjIW8w/E0OQcJqzDCKF8izbLUSSzrf2GL1GCVbIZAaIQkLI01gYPGl
5FsbS2eqItcyWuSjAxhHrt1ssbLFaqcICatRwShWIM90PZJY0vlGBekxSraKPAtJHlwhHZCw
2hEw2k4gj77VSizpfEMgPUbJVgikRkjCwkgTGFnM7ImmxtIZtlpTGS32VaUNItdutljZYrXT
goTVqGC0jUCeYauVWNL5RgXpMUq2ijwLSR5cIR2QsNoRMJpgNFHu5eB09CoyByMdsfVbRK7d
VJBUkHaGkLAaFYy2E8ijV5HEks43KkiPUbJV5FlI8uAK6YCE1Y6A0T4CecQbdoglnW8IpMco
2QqB1AhJWBhpAjMWo/3QnLF01K3WnIxW+62ChpFrN1usbLHaKUDCalQw2l4gj7rVSizpfKOC
9BglW0WehSQPrpAOSFjtCBh9YTQo9XJz6rs+0lZrbkY6euu0iFy7qSCpIO2sIGE1KhjtI5BH
rCKJJZ1vVJAeo2SryLOQ5MEV0gEJqx0Bo/0E8mgiSSzpfEMgPUbJVgikRkjCwkgTEBbDvdCA
/dAjbbWSb160Ra7dbLGyxepFYWNFwmpUMDIqyEbF/jgF3IIa0KV2fIAFseRBRSA9TklWkZCT
BlZQYxJWOwNGQiCn9kEDK0ntsXItiCXPN5FrNxUkFaQXhVSQFicWtRlMQxGcKvEyi+QRtlqJ
JSvlHgikxynJKhJy0sAKakzCamfAaIFAjkVT411kUftWK7HkuTty7aaCpIL0opAK0uLEomYI
5HCbtRfJzBVkP4qaRZJYslKOCtLDlGYVeRaSNrJyWpOw2hcw+sJoIIIdp+A7Woc6rD1XngWx
5Pkkcu2mgqSC9KKQCtLixKImBPIlkh93sQaWeoFdWzGx1ohY8sghkLOcfh+3SxNG7W3jl9vj
V/H8vT0uP5fHbcIwErIaVi3/TsJqT8FIM3qrHMd7oQFbrbXesEMsGbHUnrgHxMxfWHpDKNPq
fv15XF5q93u7PH6u9/mB3q9PIUUgVzuThNXoYKQZdVuf7Rbr+CdQyWqsIoklM5YQyClQ98f1
TezGf3ba/LeJPAvx3Fy+FQmrfQQjzWhWILt/GFyb9LqyrWoTSWLJc23k2l3vNci2InzbVn1u
t34rIh+PeRGNhOy5uXwrElb7CEaa0VeBHItkxuogUHu9SS+0IpY8YJFrd7UC2W2pTghkv+U6
jfa7QLYByS8IQGB/AuM7XLONqC9QyfTjEMh4EvWx6+9pdHlWEQJZ3izLGhFntNofMNKMZAU5
7CKg7Ktlq5VYMmMJgZwAxRarFz0ZrUhYDRNGmtEigQy4Lhmgud6kF1oRSx4wtlinOHWPbFyb
q4r9DzfpeOG03oqE1exgpBktFshAkfRGu48VseRxRyBnOC16zKPrg5t0vJCbtiJhNT0YaUar
BHIskhm21UrfaiWWzFjKEAtzR6r2Jp3nhOZeFPD6++FNPF3F2T4H+fw9vts18izEc3P5ViSs
9hGMNKPVAplZJBFIz1elW0Wu3ZULZD7XRULON8p9e2Lx1/xhpBklCWTffYYLieNXwU792ZtN
jBWx5HGNXLsRyJcPIiF7bi7fioTVPoKRZpRFIMfVpHfYNyv1rvTAnTtrtMSShYlXzXmY0qwQ
SM2PhIWRJuBZZIulhEqyF8C5rVYE0vPl3laRazcVJBWkHd/ZFjX7iPUZwsjzWVZOK0VyKIBT
IolAer7c2wqB3MADkZA3GP4mh8i6qG0y4u0PAiOPeXZOar90YlhTAjn+O282MVbZGcUMc/de
I9duKkgqSDvASViNCkaaUWsRwmmhSI4rRG7S8XxXmhUCuYFHIiFvMPxNDhGyqG0y8u0OAiOP
dSgnc8t1agt1ocZ6k11pFcpo5ZhKbBa5dlNBUkHaMU/CalQw0ozCKsjhoQ2R/HaNsQShJJbM
WAq8WIxAIpBeFEZti9lHr8OQRc3z0yachEg6z0EaOutNeIXVJoxWjKu0JlSQG3gkEvIGw9/k
ECSsxgwjzWiTCrIfRoZSMEMXHpSRFbHkYYtcu6kgqSC9KKSCtDixqFmYYm7SmTt0BoXL0IUH
ZmBFLHnIEEiPU5JVJOSkgRXUmITVzoCRZrRpBTkcTob90i2FklgyY4lrkB6oFCsEUtMjYWGk
CXgWu8VSRSK5GyPPhcVYRa7dbLGyxWoHOgmrUcFIM9qtguyHNiWSK4QzupoklsxYooL0QKVY
RZ6FpIyrpLYkrPYGjDSj3QWyG0BTG8yJ4tR752amFSmSxJIZSwikByrFCoHU9EhYGGkCnkUR
saRE0ptKZxUhlEUwWsBgL9PItZstVrZY7bgmYTUqGGlGRVSQvaqN1W04/IWVSW6RJJbMWFro
J6/XpxUCiUDa8ULCalQw0oyKE8ipEnDBNut4xrmEklgyYwmB9EClWEWW6SnjKqktCau9ASPN
qEiBLFAkiSUzlhBID1SKFQKp6ZGwMNIEPItiYmlucZ17D503vT+rlGqyGEYL57y1eeTazRYr
W6x2PJOwGhWMNKNiKshh1Tgc9nB79dsLW72prr6Bh1jyACOQHqckq0jISQMrqDEJq50BI82o
KIHsh+s8B5lYVS6tJoklM5bYYvVApVghkJoeCQsjTcCzqD6WVorlEpGsnpEXCslWkWs3W6xs
sdoBSsJqVDDSjIqsIL1hf1oFCiWx5DkFgfQ4JVlFQk4aWEGNSVjtDBhpRocSyOF0F4qlqiaJ
JTOW2GL1QKVYIZCaHgkLI03Aszh0LC28seeb+dS/eYTPYxW5drPFyharnUmHXtRsCt8NYeSB
PA0ns6qcqianGAUWS57jCrRCIDdwSiTkDYa/ySFOs6gl0ISRB++UnAyx/BDK0Rt9EMipy8Bx
dV5cz16eFGOFQGpXnHJR01jeLGDkATs1py97qrNbqq9/2Fogne1fz+NxVpFrNwLJFqsduade
1ExKMPJAwelv4Xn7FEgngC8VdMQp+hrl33jGyryTYE9FFwLp5VySVSTkpIEV1JhFTTsDRppR
awGnCU6N6LwJ0uvPa4XSbffNY0PB/rDrx+u5PMwqcu2mgqSCtAOXRU2jgpFmhEDOMxoL5Pg9
dc6/u8K41m44+q23fKkgvfxaYfX7uF3aM7Tm9+X2+B31EHkWsmKwRTZh8ddugZFmhEAKgexP
2tuvEY5UTAnkx4tfhQquFUnVzouCdVbR28pvJwDrhlhfq/v153G5PWXx93Z5/Fzvb5NAILVP
WfxhpAl4FsTSNCclPFtXbDOXHpfq8KS9FymfVuPropFr90m2WO+P68/l8dLHhvj4z+2J2klQ
rI3Kph2LmoYHI82IClIw6m+AGX7PvldOD282qzXXIB2RX2Iznsx4TJFr9zlU4X4dbas+t1uH
RWQk5GzRunNHLP7aATDSjBBIj9Fb2WU2yW02rtb++k+8i3WJQDq2uefd93cKgey2VN+uOz4F
st9y7RK2uyOL3zAgBogBYuB/DHxcBp3YLo3k5Rw/Sh7bXbMT/DgCeQIMTBECEIAABBYQOIVA
Powt1gXMMIUABCAAgRMQOIdA/t4el59rc2tO//N5k84JfM0UIQABCEBgAYFzCGQDRD3msYAZ
phCAAAQgcAICpxHI5unHry8KOIGvmSIEIAABCCwgcCKBXEAFUwhAAAIQOD0BBPL0IQAACEAA
AhCYIoBAEhcQgAAEIACBCQLnFsju7tbhK+hmYqR9TKR/icDEi84PHVkuoz8In28pOjSfdnJL
GXX27cPVRuwdCZ7L6Y/PCRmN/X3mtWcu9pcwWWKLQA4I/IETi1SbrH/vpGsfD2mSdvSi8yOt
YW9zcRkNGnUvZWgYnQVR94ztArF78jmZMLbxYXN6f8vV50s+DpttnxM789oz5+YlTJbYzhzv
3BXkxEvLx5x+7/e3T2OdL2EXPDPaBOT1dv94z+3xlzSTUScSw+dxj0/mfYYOp5HNiZmx9kyc
MyxYj3PwQyCXns23CXua8qg79R99CWX21O5xu7bf2TzhFqvF6MXl+n+7/lRh1IWNF0vtM8v9
u5Pb/z4fpy+XeoAxOudasB6vWLsRyIUCeb6EdRe1ftsQgZxc3l6V0LU5A35etjzjVqsXS8Nn
ltGD/9F0vrVH77AsYbLEtj8yArlEIN/2tLXzjmFhLGrN4v9/IUMgp/z+uTX/vJ59LgEwYul5
+tDsRjQx1Xxx55TXa6cDaHAvxDFWluRZLFmPl9gOBoZA2gLZLvxnvH6kF7VuS2ziU2HDz4kl
J0PRHWhGfFHG3WJt8+z/TUzP2Dpj3g0D/qxrz7ekX8Jkie37MRFIUyDv1xPeebjgutH/sKKC
/LbF+v+F+XCa5PTxKIg++Sj63CnD4M679szDW8Jkie34iAikIZDt2f/bVtjblmKGDCi6i6UL
FAv/tDtf7wLuA+njE2xFB0GmwTmx9Nx6/tt9OPFdrN1m86nXnplMWsAkld95BfLtYeThtaDX
QvZ6IcD09uFJtnxMRu9hfDKBXMTo9Rxttx19khjqg2MJJ14U8Ny7mbx0cbK4GWnkdyb51+7z
CmSmc2K6gQAEIACBYxJAII/pV2YFAQhAAAKJBBDIRIA0hwAEIACBYxJAII/pV2YFAQhAAAKJ
BBDIRIA0hwAEIACBYxJAII/pV2YFAQhAAAKJBBDIRIA0hwAEIACBYxJAII/pV2YFAQhAAAKJ
BBDIRIA0hwAEIACBYxJAII/pV2YFAQhAAAKJBBDIRIA0hwAEIACBYxJAII/pV2YFAQhAAAKJ
BBDIRIA0hwAEIACBYxJAII/pV2YFAQhAAAKJBBDIRIA0hwAEIACBYxJAII/pV2YFAQhAAAKJ
BBDIRIA0hwAEIACBYxJAII/pV2YFAQhAAAKJBBDIRIA0hwAEIACBYxJAII/pV2YFAQhAAAKJ
BBDIRIA0h0B2Ar+3x+Xn5/HT/77cHr/Nr9u1/X9+IACBrQggkFuR5jgQkAQaEby0wnh53IZK
2Avm9S57wAACEMhHAIHMx5KeIJBA4CWOXbX4+fN7uzzQxwS8NIXACgII5ApoNIFAbgKtAH5U
jsOD3G/vVWXzb/drvw17fdzv18dPq6B/27PN37Xbsl1F2v5316Dbtu2E1rUbjGHyeLlB0B8E
CiKAQBbkDIZyVgIvIbNLxKf95W8f9v649sLXImzFr+nrfm23att/+y+grcj9tXPtXkI7e7yz
uo15H54AAnl4FzPB8gk8Be6/AL1G/Kr4/m7WeVWCbyLXmbaC+f+6ZVuNXq7Xx62tFNs+LtfH
tfvDU1h7HXbt1PHK58sIIbCOAAK5jhutIJCRwIxAdkd4/lu3fdpXh+PrlG0lOPi7biv09ee3
rdtuW/W13dppp2E36nt2DBlp0BUESiGAQJbiCcZxYgJfbtDpqshRdfh+i+vEdmsvgp8V45/Q
dsKr7boq8+vxTuw2pn54Agjk4V3MBKsgMPMox7DK6+rJ4TXEvrrsBLR5UrK9/bW/WaevNj9E
sLk22W+9DqvSGTt5vCrgMkgIrCOAQK7jRisIBBB4bacOXxIwvPnmT/QGd6++ieRTQP/u9RmK
5Z/ds2p07f7f7drfDduPcfSsZgANuoTA3gQQyL09wPEhAAEIQKBIAghkkW5hUBCAAAQgsDcB
BHJvD3B8CEAAAhAokgACWaRbGBQEIAABCOxNAIHc2wMcHwIQgAAEiiSAQBbpFgYFAQhAAAJ7
E0Ag9/YAx4cABCAAgSIJIJBFuoVBQQACEIDA3gQQyL09wPEhAAEIQKBIAghkkW5hUBCAAAQg
sDcBBHJvD3B8CEAAAhAokgACWaRbGBQEIAABCOxNAIHc2wMcHwIQgAAEiiSAQBbpFgYFAQhA
AAJ7E0Ag9/ZA1PH77wsOPrYbdSj6hQAEIHBEAghkRV7tPp47+lbg8Gvzf1PpxPH/d//evwhf
0YQZKgQgAIEdCSCQO8Jfc+ipL8z/XG6P9mPy/c/bx3DXHIQ2EIAABCDwQCBVEDQVW1O2PX+r
nyjb/6Xh43b5ebxVhO1X44fbqN2fn9UjPxCAAAQgsJ6Aseqv77zqllOiOCeUUbZjgN3W6eVx
G5SLv7fLnyC+bcFOVJXP7dlGPFsRvSKhVccng4cABMIJIJBziOcqxqm/j7Idja0Tw6HwddXi
e0XZiuT7NcffUdV5f1ybNuhjeG5xAAhAoHICCOSUA4dbpVv/92xAPYXu/Sad92ry0VyJbG2G
4jctmON2lUcxw4cABCAQQACBrEUgJ7ZXP4Y+uHu1+7f2z6Ot1sm/CwgsuoQABCBQOwEEck4g
v3l2uKWqbt5Za6u2VyfGN96Cbf/8fbu19vBl/BCAAATiCCCQc2yjrisu6fdvbOPriNODHm+n
vv/5ee3xecfr76P5Hz8QgAAEIPCFAAL5TSDHYrbHXayvG3H6a4/zD/23Aji6tvj3Np3X3avN
wx//RZK8gAAEIACBr5uF4BEEop5tXNKv4yQe3XAoYQMBCEDAJkAFaaMq0PDvppyJ6rHA4TIk
CEAAAjURQCBr8tbHWNkyrdp9DB4CECiaAAJZtHsYHAQgAAEI7EUAgdyLPMeFAAQgAIGiCSCQ
RbuHwUEAAhCAwF4EEMi9yHNcCEAAAhAomgACWbR7GBwEIAABCOxFAIHci/xWx/17WQDfiNwK
OceBAASOQQCBrMiPb9977F4b1786TkyClwhU5GWGCgEIlEIAgSzFE+Y4OpEcfKFj/OepbtqX
lvP9RxMwZhCAAAReBBDIiVBwPgHZN4uynY7QiZeWd+9q/fZ9x/ZlAmyvkvEQgAAElhJAIGcE
8hvItV+wWvJlrMnjT3wTsvvE1UgA/2/FNsLI9urSnMAeAhCAQEcAgaxIIMffe3y8vvTx/wsf
zwrz528/9fkqOrZXyXYIQAACywkgkCu3WJ2t1TU28y58id/fzTmfN+iMvwf5eLRtvm2/Lg8Y
WkAAAhA4CwEEshaBnNhefRt6W00Obt7p/m3q784S2cwTAhCAQCIBBLKSLdaP7dXRuNvq8W0r
9fX84/wHlhMjh+YQgAAEDk4AgaxCICfuXp0QyD8x7CrH6+Pabq/ef5uNVn4gAAEIQGApAQSy
dIF83YjzfCnAz2O2Ivx7Y05/k87rW5GNUDYayQ8EIAABCCwkgEDOCKS6waZvpuzGj4Qo+4X+
wxwCEIAABIIIIJBBYOkWAhCAAATqJoBA1u0/Rg8BCEAAAkEEEMggsHQLAQhAAAJ1E0Ag6/Yf
o4cABCAAgSACCGQQWLqFAAQgAIG6CSCQdfuP0UMAAhCAQBABBDIILN1CAAIQgEDdBBDIuv3H
6CEAAQhAIIgAAhkElm4hAAEIQKBuAv8Adr2ksEOR4oQAAAAASUVORK5CYII=</item>
		<item item-id="31" content-encoding="gzip">H4sIAAAAAAAA/+xXTUwTURCe7X8LFVoUaSlaERGUH1moSq2kCJiIYLUYPBp+NlDT0lJKKp6I
XkxEY2Ii8YaJ0RhP3jz6FxNjFDx7weiJaIx4M9p13pul7BKi+BdjYJrp7ps3f2/m9fV7uQAg
IHch2/i7Dr8NqaQkFQMjEdkS6wv1npL6UlwCYeQAGgX1oukzwLhBvPMQR0axEB/jJnHiAT7M
oj3ItS3K2Co6X6CWxSbq8gD6rThj7oFRGIAYSDAE6DxHvJRAVSvkirZH+JJjJ91cAKPhKNTA
QWgGWMeFN1Bo0DNhKw+TR9Et+ZRMnkME1Arm45ST0swvEHnWToD1fJXWlu6utuFDKSkmcBfo
EUxqgR15A1e1SMNhaSASHzLyiQZm3R/vI5mByxqz1TONDCYOxE9TsTqQzSgIZ8vXifxFD9Bu
Bpg0spwBLqCPt2aaP+MGcGACOtAV8t44s5GaU6lkpHc0JVF+frZuUNNGf6lmXLTQBRd1ochN
XXAVU2Xdy3TBQ11wQwl1wbOJdEs0XdhMXSjRdsErXn2MJq4tVH0vikr567hXk9dWXqhcbEBL
PNYbZyWnCdYvM4oXJWyBAdya17BEh7FE71j9cf2yzLRRNRSVWqIRaSjFbQTaz1Qg/o22M9OO
2et33a9hCTWBHjKyFUwq2aI1paNTxhmZRSSS1+i/oq/IGRWv0eqiMMTxkwIvtPEzLgljS4+C
71IhGLO/eXYWnAWfUOp45bgyDvbuJ0a3WndqvvfEscnnAp7wcF85SFowOotLJ+zIT8Vm5ASd
oF7PSu3OCz/WWSn9Svw/Sb8Tn5WBneOsJ+zfmv2LszN/7SxYHWREKHeuACDtov1g0+yM7LtO
mRpE9pDMo3A/RPjuyVNU9IpNRGXP8OM95A+ydodeVgXpRKTtRR7EsyCKHy8CpyiiLy8H2rI8
8WYuPT87l44SqAT27LjtyE98eg/PbrWnP/5F3wEmPD7xtK5vxnHzIkyVTRtfLqAhy5JaLVc/
KiBHwMAwNsbMyBr+V8SzLCMg6mQ5CgSsu6RkpCd6sjUykoj2jB2J90ukH+JG28hAQdjlyv1l
O6Hh8mWQcwUh53KoJORcsYN0KzXIeSch50otcq5S7i/VdH+pqiEEXY1TtXR/qd5F95daVts6
yq2WLyYYAkEkQRV3Vq84aSAn9SjykZP63eTEx5zsIRtf1slelZPGRVu/YruPbP3MNkCq/qzt
ftVkk2qSjb8BAAD//wMAJYdy5mYOAAA=</item>
		<item item-id="32">iVBORw0KGgoAAAANSUhEUgAAAZsAAAE2CAYAAAC3Gj/IAAAAAXNSR0IArs4c6QAAAARnQU1B
AACxjwv8YQUAAAAJcEhZcwAAEnQAABJ0Ad5mH3gAADHISURBVHhe7V3bmeOsEpyo/OBo/ORU
/Oo8/D5hOIFJYjPQ6oaFuDZyCSGo/zvznd1ZxKWq1UVDI346/kcEiAARIAJEYGcEfnaun9UT
AQuBn5+fjj/EgDZwDhtAuTCKDQpJ1iNGYHAy//79y/aTu72cYzt7W+Qm33uwxVYGflD/4WpC
9Yj1VI9AbgeTu70tL3Wrz5Abik31Do8DPA6B3A4md3utCseWcZMbis1xnogtV49AbgeTu70t
TrfVZ8gNxaZ6h8cBHodAbgeTu71WhWPLuMkNxeY4T8SWq0cgt4PJ3d4Wp9vqM+SGYlO9w+MA
j0Mgt4PJ3V6rwrFl3OSGYnOcJ2LL1SOQ28Hkbm+L0w09835cVueSLo93trRx9FjM+s7OzTSe
d/e49Gdmbq9qeFE8MfW5endc9wBzO5jc7SEd9CQ0l+7xnmfA70d36c8+1CI4Z+bmw/PrNk0G
KDZBx8VzNnX79SJHl9vB5G4PJzbuGfPrNpw8v3WvjAdjcWNaLxudl5t+HEpk1BcxKDYUmyI9
bsOdyu1gcrcHc8yeKMaKdk4sOqflZoX5q7sxsol6NEY2UYhYAI1AbgeTuz2Y2Mwz59vL2ET2
/f6EonNabig2yW6BYpMMGR/4FoHcDiZ3exQbeYbVabmh2CS7AYpNMmR84FsEcjuY3O1RbCg2
MBs4OFplNtq33o7PH4pAbuefuz2Yo+Ey2klSiblnI3EojGwkKLEMFIHczj93ezCxYYIAxYaR
DdT3sLLGEMjt/HO3BxMbz2FBpj7Ll+lwXITaZGQjcWGMbCQosQwUgdzOP3d7SAfHQ52lCYur
PxQbiYOg2EhQYhkoArmdf+72kGIz1MXP1RQqOOahTnW48/Lo3gcvf6FskAkCUNfHynIjkNv5
524P9aK3UA+5KVRIZ7Gk2OT2jmwPikBuB5O7vRZEAjVGckOxgToXVkYEdARyO5jc7aEccQv1
kBuKDb0jEdgNgdwOJnd7LYgEaozkhmKzm6NhxUQgt4PJ3R7KEbdQD7mh2NAjEoHdEMjtYHK3
14JIoMZIbig2uzkaVkwEcjuY3O2hHHEL9ZAbig09IhHYDYHcDiZ3ey2IBGqM5IZis5ujYcVE
YHAw/CEGtIFz2ADKY/ELAigkWY8YgdyzWeTBNPEgWVCEALkRwXRYISQ/FJvDaGy3YYpNu9yb
I0c6M6KKRwDJD8UGzw9rjCBAsaGJKASQzoyo4hFA8kOxwfPDGik2tAEhAkhnJmySxRIQQPJD
sUkAnkUxCDCyweBYQy1IZ1YDHqWNAckPxaY0dhvoD8WmAZKFQ0Q6M2GTLJaAAJIfik0C8CyK
QYBig8GxhlqQzqwGPEobA5Ifik1p7DbQnxSxQVwchnxhGqAHNMS/7nntz5Hcf4P1kRsQ3EnV
yLgZqkTyQ7FJIomFEQhIxQZ1JTLyhUGMv4k6fu/TwV2KTXl0C7mh2JRHHXuUiIBMbN7d49I7
q9ur0z+N8roNp65v3Svh2l2KTSJB3xRXjkx9JYJi8w2a2GcTuaHYYOFnbQcgIBKb96O79A7r
8nivxMaKdgSiQ7E5gOTut7szsjkCeEGbMm4oNgIoWaRsBERi87qNyzC3l/GhQt/vA6JDsTnC
HmQOjdyUyw3F5ghu2CYUAYoNFM5CK6PYFEpM3y0ZNxSbchlkz4QIUGyEQJ26mMyhMbI5gmQZ
NxSbI7hhm1AEKDZQOAutTObQKDZH0CfjhmJzBDdsE4qASGyYIADFPH9lModGscnPDJfRjsCc
bR6CgEhs/jH1+RByYI1SbGBQwiuSccPIBg48K8yNgExs/nU81JmbGWR7MofGyAaJubQuGTcU
GymeLFcsAlKxGQ5z8nM1xdLo7ph5cFAd7rw+uz/HExSbjPwmckOxycgNm9oHgRSx0b8esPXP
dGj78IioldwgUNyvDiQ//DbafjyxZg8CFBuahkIA6cyIKh4BJD8UGzw/rDGCAMWGJkKxOYcN
UGzOwRN7yciGNiCYeBCkchGg2JTLDXsmQICRjQCkRoognVkjkGUdJpIfLqNlpY6NDQhQbGgH
XEY7hw1QbM7BE3vJZTTaAJfRTm0DFJtT08fODwbMH2JAGziHDaA8FpfRUEiyHjECXEYTQ1V9
QeTMuXqwDhggkh+KzQEEtt4kxaZ1C1jGj3RmRBWPAJIfig2eH9YoWKff+jWALc8hXxiSi0WA
3GDxRNeG5Idig2aH9UURYGQThaiZAkhn1gxoGQeK5Idik5E4NjUhQLGhJSgEkM6MqOIRQPJD
scHzwxq5jEYbECKAdGbCJlksAQEkPxSbBOBZFIMAIxsMjjXUgnRmNeBR2hiQ/FBsSmO3gf6k
i4371k5psgDyhTkDPX/P6+oc0/XpuknGHon53P13S5n5Yi7tLJWrnlaX0Y7lRufzr3teh3M+
1y5kHsh3h2JzBu9RWR+TxeZ1m5zn7dVJBUYvh3xhSqdicmaaA/l7dtceu5jg/N4Hx3PvlL4o
p6gLRbzM7MC0i9Jc9egYkptc3Kwtd+KSYlP6+8z+fYmAWGyUyKhZMsUmgvzs7I1QwhQJqxKn
IBnCISnT38X5fJrhkC1AbYrN0dxoqI83dl67+92YmDisCzkZYGTzpePk4+kIiMWmvxZ6ilBe
3Y2RTRxoTxRjRTtGTb5/138vKePuIMVmxKUUbuZ+DPORmF0M3abYxF87ligYAYrNTuTMd8xb
eyS+38/d8Dod7TlJGeeoZuf249m4QTqznVDFVFsEN9N+mlpSpdhgqGUtBSNAsdmJnI0OrZM8
JynjGBb3bGZQNuKH48a3n8YEgZ3eRlZbAgIUm51Y2OrQhr2WMTNpSRDoF1nm3/10U1AiKWOM
a+7Pj5YwYI6ckc2wf6IwdtmFBPd4Gde+HSObnd5DVlsOAhSbnbjYLDa6mCxZSvYG8iJAKpPJ
v8msUqB1AbPHTbGJiQ2GmyX7zHOtQYZlTiYI7PTes1o/AhSbnaxj4ya0rzejgwpEJcNz7jIy
oRmeb0ZsiuFmYZuRzU7vIastBwGKzV5cbEyvdXZnvZns7rGrjGtJJzzx2AuNsuotgZs1IhSb
siyEvdkBAYrNDqDOVUoOdapNe/9BzzkyCR39749/DplN6yyzNKFpKrLpB3ssN7bNUWz2ew9Z
cyEIiMXGPNSpDndeHt37cwZHncXx/38zSzUrwVnW5k1RcYnNXp+qmfZ2ph+XdpGb9aeE9uOG
YlOI+2M3ciIgFpsEQQl9xqY1h5aTy2/bIjffIrjv80h+mCCwL1es3YEAxYZmoRBAOjOiikcA
yQ/FBs8Pa4wgQLGhiVBszmEDFJtz8MReehCg2NA0KDbnsAGKzTl4Yi8pNrQBQZRLkMpFgGJT
LjfsmQABRjYCkBopgnRmjUCWdZhIfrhnk5U6NjYgQLGhHXAZ7Rw2QLE5B0/sJZfRaANcRju1
DVBsTk0fO68f9OOfPR9G1A5DEiNidKQNoDwWl9FQSLIeMQJcRhNDVX1B5My5erAOGCCSH4rN
AQS23iTFpnULWMaPdGZEFY8Akh+KDZ4f1ihYpw99Xgb9b8gXhuRiESA3WDzRtSH5odig2WF9
UQQY2UQhaqYA0pk1A1rGgSL5odhkJI5NTQhQbGgJCgGkMyOqeASQ/FBs8PywRi6j0QaECCCd
mbBJFktAAMkPxSYBeBbFIMDIBoNjDbUgnVkNeJQ2BiQ/FJvS2G2gP3KxeXU347zJ7RW/LM1M
MEC+MGegx7wIzX8j53o05nPrWziHsvPtnBondt2SMku75GZ9eZrPviSX2y3PqhtTr93TWb37
impX20h+KDZn8B6V9VEmNu/ucekP82m3cr4fl3G/J1VwkC9M6VRIrh52jeH3Phyc1J3TLBrX
Zzf5K4eD+r2PfCyCIymzbp3c6Pi5rWvi5t5L/fSfEh7frd1TeZNPre6ZN3syYbeP5IdiU7r3
qLB/YrF5vLp1lGILkCRNGvnClE2He8ZqOit7DLOwGN5rLVx93U/l7lQNc3u6IEXLtCo2G7n5
e3bXlaBrwv/B3RSSa3e/X43JwxCYTpODz49PrbTqkO8OxaZs71Fl72Ri41ouo9gEDcLpmNRM
2LekMtQYEptlRm23bYqNq3fhMkhnVvTLspEbK1JdRTcGp3Mbg4b4npsed/Ptwg/JD8WmaAut
s3Obxeb96C7DzOxmRjzhfRzkC1M0I/PM1Zqw+n6/mhDPM97Pw/F1/bBDmyqPlSE3U7ThCzK8
+FmcTgKiljQpNkW/qexcLgS2ig33bCIMfSE2izAsyyzuxAK1+dyXcy3jTBLTPa9zPd4y01go
NmGxUUtf4QmEHT1SbHJ5M7ZTNAKbxOZ1m9aatYQByX7NUIYOLeLQhoUVfRN6Xo4Z8Q6t63uW
hlbGFylDbmLcKOHWlzMXMR/oce3JUWyKdoHsXC4E0sVGpUDfulcvHlKRUeXo0CIOzSMIKqsp
pDfx5AO3M1S2Rm5iYmNEinOWmZ4AsGSfea5isMOiccmN2Wi5PB7bOQyBNLH5Tmiaimy+2oR2
7BsIIhc7Zdo2q1CZZsRmIze+l3TENLBEycjmMPfGhktCQC42c/bZz7aIprnIxnUWxlwicxmC
dV5mLqTvAfXO0spqVu0ppycpY7TfjNhs5cb54q6TAVxFKDYleTz25TAEZGKDEZqmIptha/5p
nK9wzKjVoUDrMGboUGegniWBzT4TEjuA2I7YbOXGfE1lacsUm8PcGxsuCQGZ2NifqtEPpKV8
RaAlhzau8I+C488qs8Vmsg5r7d9c6zcPBbpSdiVlNGMkN+vvybi4SftUzQSuU2wc3Ix2EliO
Q/LDczYleeFG+iITm/REAF/iAPKFaYSibMMkN9mg3tQQkh+KzSYK+NA3CFBsvkGvrmeRzqwu
ZMoYDZIfik0ZnDbVC4pNU3QHB4t0ZkQVjwCSH4oNnh/WGEGAYkMTUQggnRlRxSOA5Idig+eH
NVJsaANCBJDOTNgkiyUggOSHYpMAPItiEGBkg8GxhlqQzqwGPEobA5Ifik1p7DbQH4pNAyQL
h4h0ZsImWSwBASQ/FJsE4FkUgwDFBoNjDbUgnVkNeJQ2BiQ/FJvS2G2gP/qBQ/7Z8/FE/UZF
/nl9wyTxyIoHyiVRbFBIsh4xAoxsxFBVXxA5c64erAMGiOSHYnMAga03SbFp3QKW8SOdGVHF
I4Dkh2KD54c1RhCg2NBEFAJIZ0ZU8Qgg+aHY4PlhjRQb2oAQAaQzEzbJYgkIIPmh2CQAz6IY
BBjZYHCsoRakM6sBj9LGgOSHYlMauw30h2LTAMnCISKdmbBJFktAAMkPxSYBeBbFIECxweBY
Qy1IZ1YDHqWNAckPxaY0dhvoj1xs7AvULo9357u3hvfZTMYTuzwtaGLGBVvr+9PmWyK1cy7m
/WpL3X/d89qfIfIXGIsindkZXp1kbuYbUr3n0WZ8zXqX8tfuOdzPJqzHxBDJD8XmDBZaWR9l
YjNfC317LeLyuo3OKVVwkC9M6VRIroX2jWG6qfPe/ToLzOKh3eoYvPJZiRbF5oPmN9zYlKyv
hw5fAx2y2vA108h3h2JTuveosH9isXloQvNvuLlzFqDLo3uPf5f9IF+YsulwRxNhEdGjIZ/Q
jPFS93yaMmQLUH+39Pp0O8VmNpnt3LhszhSXrWITew757lBsyvYeVfZOJjYuIaHYBA1iXiq5
jusm2oLW89oLwLycEopaIsJgP+oQm0+h8IxZFUM6s6Jfls3cOEallsQ0vmKi4ab92V2HJdEA
70h+KDZFW2idndsqNu/HpXeal+7xlkU0KvJBvjBFMzJHFZbv8P1eDWZ2Xvfn7HzUnoy2ZJbu
rCg2K8y2cuMAfopU15MH156NOekwq3LVY5ZBvjsUm6K9R52dSxObOZoZHGDi8hnFZrafmNio
pa+VuMxiERCc4J5Nv/Nzj8yah94hnVnRbwtKbBxRjXPcsT0zYT1Ifig2RVtonZ1LExstink/
ugsTBPxGsdWhbXnOKVB61yg2e0Q2kmhEtRvaq5PWQ7Gp0wc3M6rNYtMnBLxuwxLCrXsJkwOG
6Ab5whRN0hbRGAbke86zz9A/MEUt3sy1sVJGNivtnRInkpc49TqE0ciyOurZq0uoB/nuMLIp
2nvU2bnvxSZt3wb5whTNyNZNaJ+oOEVIIjQUG8tOtnKjVSSNRmJik1IP8t2h2BTtPersnEhs
+iWzx8tMBGA2WtgitqbXuvdn7Aynuf5gRPNZxGFksyJrKzdzJQnRyPSEJ1MwsR6KTZ0+uJlR
ScXG3J+ZstF+upslQuHsNOQLUzpJkoODamN/la1kRTHmMliK0DCycdnJZm7GlU47A21pY+DK
nZ1mLtulRDVD/ch3h5FN6d6jwv6JxGbYk5m/GDCUVz+pQtPUns1nEjys1S+Yuc/d/HRWaqxx
IHP97/anavQ2Pk7NPNQZSaNGOrMzvCqxz9WEJgKh8zCTiOg/jnNVsQw1B4BIfig2Z7DQyvoo
FpuEJIDQ1wSQL0xlVBw+HHJzOAXBDiD5odiUzXWVvaPYVEnrpkEhndmmDvAhig1toF4EKDb1
cps6MopNKmJ5yyP5YWSTlzu2Nm86Sj+iiSiHfGFIIBYBcoPFE10bkh+KDZod1hdFgJFNFKJm
CiCdWTOgZRwokh+KTUbi2NSEAMWGlqAQQDozoopHAMkPxQbPD2uMIECxoYlQbM5hAxSbc/DE
XnoQoNjQNCg257ABig2Sp/6gU/KdUcj2j66r/3zF3bhsa+8urQ+fmYfR+HfiQxsoyQZQ/qDt
ZbThO0FNK81kRsOp5ZwwMLJBvb7nrwc5cz4/GuWNAMlPw2IzfOspdOd6ecTv16O8WFBs9mPy
bDUjndnZxn6G/iL5aVds+uWz2LWpZzAGWB8z4kGxgbF2+oqQzuz0YBQ4ACQ/jYrNMJN3fKhO
ke37mKDo0+o7W8xufes/tBi7cx40NIoNCMgKqkE6swrgKG4ISH7aFJvxTofIEtp878Oyl+G5
H+II89ipb7/3gAADx0mxAYJ58qqQzuzkUBTZfSQ/9YuNI9tq/Ix3bBY/RhBrQZo+/13APs9O
fRvGl2NpkWJTpF85pFNIZ3bIACpvFMlP3WIzRgD2bH28+yGSfuUqM/4uJlIZjG+3vg0ilmF8
FJsMRnKSJpDO7CRDPlU3kfw4xWa54Kd31E/NATku37Fmw549heuzP88xX+4z+nl1PamKFMy/
fyhRNwROuffjzPtT9mdO2V3KqJm5eZnQoi3TJVDhGfxURtcjhUnOFGG3Ve7YN0fEtMebsU1s
5iuhfy7d4x2+mdP8eCfyhdkDD3SdsQu6Qnaln++w3xH7ArVtZZYekJvenyX9p3yd+2ZO+3xO
uFzMnyH5McTGvCdbc8yDI+p7ZorLap1/dFba4My/d/P1pb99xDHOoIe/98tSg3jof/+AvxaG
9fLX/Kyqc9Sg9TLQIDjWyzALVVBsnIJZwPLZgMueffNEgua7YN8KaBzCi1jwFrF53VQbFJuQ
b5JcPWw/b773i50t7wmqzLp1pDNL8tkHFN7Gzbqjy7vnEpHwnuv07OLHJBNoJD8rsbGXZyYD
W0cF2oBWG+1TWftec81Jj8s0/Yn9+yA0s0Hf+7+rpZvVMo5t3CvxmMXvt39+CJR6qTEyzOx7
uadiw9LaOmpxOlPBcpI5g7RmFaE6Np7cly7leQUhJARCsfn2PU0Wm/F66Et3u13G/2dk42PA
IQjja7Z2Mk6xeU5v0fKfmRDT/x1SplWx2cqNhtc8eb/3iTyrSf3o1uzfremc/N56kh1PetpH
bFxLKGbWlrGmvxYnE0y3WOggmS/B8Pf1XeZK2ObwXXOUo/D06cufX32iowlibxJAVGwky2y2
AZhffAlvtpsiLnXfaX2zExpmHH0iWKLYvB/dpX9Jbq9/3ftBsQlaiidqjzoiZ6VxRzRN8GL7
mOEySGcmfYsOKfctN5rfcvEZ49j377HnkPx8IhtfVKNvpJuRxcrZa1HDZ4a/mkW7oiQzarJD
vKkucwnLdrpr5+6IspSFzctQ3gl+osP1ilrgm2sq6oitl1ovRWLfnIkQofFHhXjqUb5ltFd3
6/m/PN7dsA9DsYm4SR+3MZt3VBtzQp8JnSMBZxUfRWbcSGd2iIhIG/2KG8d2goG7a5VFj2K8
fEZsA8mPR2yWjcD772/X/29wMf3+yhxpjN8Ue86fe+l/v4Qj/oOBRuQx7j3oM+zPntC9G6ME
M9LSHa1Zl7YXNH5U8hOROT7DEnGokkw13b7MfaG/PhHCXJBY2eMgQn0ZV5ZczG7T+mYnEsxS
MSVquJQuUcxi/fX9u2wZbU4IuDy6dy80FBsB2l85tFE+pkhlsA/vEjCqzDQepDMTIHRckc3c
2JGhZCLw2dtV7/nG9pH8LHs2q43nIZJQgqOiCi0TZTBER/aYrq7mBrxr8173d2q2bG1Izhls
uvFbS1SqL/rez/icY8PMJzZahlv4ZVtJzSLAKrKL7NOMH/4MZn2ZuA8+YFpv/USMgv0kfxvu
teNxVAWJzZQQcOtes9BQbAR+cqNDcdYsSaQBlEE6MwFCxxXZyI1rv00kNuN8XV8VUpMEfZVo
mTj4VlmQ/MDO2dgz/GHDKn6eJTv7khdE2ilXZph/fa576okRkcOhf33K+Tdf/vcnEtj7X5/h
Fic2gU/N315jtCP5Qb4wUtM4pNxGh+brazyxQJJ8EC5DboYMXn/C0jdL1rYorY+RDJNxV7KB
bg9IfjBi45upz0tjh7x43kbTNtlDfTeXtUJJAZbRBKMTx/JfEoiBPauQ2AYjrqQOBAvLltFs
IeGeTYSDbzehjeonm5Wk024vg3RmOAvdoSYgN9LIRlIult2K5AcjNp+QLe28xQ6UiqpM2/vw
zvusg59df37IGY0YyQJhgs0UbtGQ1oUCEUpwtmruo21oWvIIxUaC0pYyG9Nre3uxsprNTDNU
GWNYSGe2BbF8z2zkxtFBiYjIMgXjE28kPzCxyUfa9y15M8hSqp5z3qNLXWMyxTplACN2/s6G
MuRCIXs4XTsFnHBZig0OS7MmycFBtbf62R91zLqtA3+oMs2KjeMsTADT0KFzW2zsM4UWf5bJ
BZbTtbIUm2/f1U+22vaKRILhjBQCS1zbu6M96Z6tSNKtV+ecIH1xV0Kx2RHcvmozDdaVrDNw
YB/AXq9MWNuPjj3KTWV2cmb7ooqpfRM3RtOuyMbe27GXNs22JUcvKDZf8/7FUpUoM2z9DanP
S22+rJKssoSxunLt5RlsfZ/B/fF1favYSJIBXGWQL0wCHSwqQIDcCEA6sAiSnyaX0Ubuesef
43P6B9pJWtO9iI5nlDL8R7HJAPJJmkA6s5MM+VTdRPLTrtiMG6CFfFyzAPNbvjG3f2coNvtj
fJYWkM7sLGM+Uz+R/DQsNuPitrV5fyZDgPU18GkdWBtaRRSbPVA9Z51IZ3ZOBMruNZKftsVm
Xk6TbJSVbRJf9O4AwaXYfMFXZY8inVll0BQxHCQ/FJsiKG2rExSbtvgOjRbpzIgqHgEkPxQb
PD+sMYIAxYYmohBAOjOiikcAyQ/FBs8Pa6TY0AaECCCdmbBJFktAAMkPxSYBeBbFIPA5+6N/
yZp/Xr7qTSyIRUE2gHnr++skUBWxHiIgRYDLaFKk6i+HnDnXj1b+ESL5odjk56/5Fik2zZvA
BwCkMyOqeASQ/FBs8PywRu7Z0AaECCCdmbBJFktAAMkPxSYBeBbFIMDIBoNjDbUgnVkNeJQ2
BiQ/FJvS2G2gPxSbBkgWDhHpzIRNslgCAkh+KDYJwLMoBgGKDQbHGmpBOrMa8ChtDEh+KDal
sdtAfyg2DZAsHCLSmQmbZLEEBJD8UGwSgGdRDAJSsXk/Lp7zFpfu8f7XSe+3Qb4wGASOryV2
iVe4h+4rjqdn1nc5DdiHvj3YGjfbcE/BNI2b2DUrSH4oNse/9831IE1s0oSFl6fFzUlydXSw
FnUJoKUis6PTLuGLXU+MdGbxkR9bYhvuiZjGuNE5m8uGBAfJD8XmWPtrsnWKzZG0u2e+07XC
kfudzJtmXWLz/DUGZztLvQDSmR2Jarztrbj3z0kw3YGbYUxIfig2cSthCTACFBswoCnVzdea
m7NZ1732/mrnZR3R3RwUmxFHCO6KkRCmOG4oNikvFssWiUCa2Awz7uXn8niL92rUkhpydlYk
oCmdmmfAlk74fu+sO8GhzU72xyNMzXADwX0mI4ipnBvJBAPJDyOblBeVZSEISMXG2n953Sbh
ub2SBAf5wkAAOLISiNNLdWj+JIFmuIHgPhlOeB8sxs0cFQ3vkba35jNJJD8UmyNf/Ebb3iw2
//51r9sQ5dy6V/9nZqNtMCCI04s5tLlfah8h4NSQzmwDGvkegeDedzeKqZCbwNKeDgqSH4pN
PnNjSzMC34jNlA6dlqGGfGFOTyLE6UkcmkrXDScdNMMNEvdgIoeEm8WKY4khSH4oNqf3Hucb
AMXmQM4gG9UxhyYTmgEFpDM7ENV401/jLsU0xs26q5PYXLvnn3sISH4oNnEzYQkwAtvF5t09
Lv3LcXl0by6jbWRlawqu3lzIoak9gUgatRblbhzIyR77BvcUTD3c9GJnZVB34UxB9GSAYnMy
k62huzKxeXU3Y7lMfVHg9pLv1wz7OsjZWQ34Sw4Xqk1o94E/n9ikOMUJyZa42YZ7KqZ+sbn2
SQE6n7EDt2h+KDY1eI+TjUEmNioZQE99TturYeqz3zBin01xio15cFClpH8SAOzPquhp667s
55bEZmAjHXchplFu+sYdZWJHpZD8UGxO5qhr6K5UbKTZZrFyyBemBvxLGgO5KYkNuy9Ifig2
ZXNdZe8oNlXSumlQSGe2qQN8KIgAkh+KDY0tOwIUm+yQF9sg0pkVO8gTdwzJD8XmxIZw1q5T
bM7KHL7fSGeG7x1rRPJDsaE9ZUeAYpMd8mIbRDqzYgd54o4h+aHYnNgQztp1is1ZmcP3G+nM
8L1jjUh+KDa0p+wIUGyyQ15sg0hnVuwgT9wxJD8UmxMbwlm7TrE5K3P4fiOdGb53rBHJD8WG
9pQdAf2gH/+8vq+HeBCP0mwA5SAoNigkWY8YAUY2YqiqL4icOVcP1gEDRPJDsTmAwNabpNi0
bgHL+JHOjKjiEUDyQ7HB88MaIwhQbGgiCgGkMyOqeASQ/FBs8PywRooNbUCIANKZCZtksQQE
kPxQbBKAZ1EMAoxsMDjWUAvSmdWAR2ljQPJDsSmN3Qb6Q7FpgGThEJHOTNgkiyUggOSHYpMA
PItiEKDYYHCsoRakM6sBj9LGgOSHYlMauw30J1lsXrfxRkf1w5s6w0YSu6DL93Tac+oGSc/9
9cZFXb5LupDO7AyvThrGy4iCz/VXPg+3cHrP55jgC7kZWkfyQ7E5g4VW1scUsXndhpfo1r36
651jl6T5/h35wpROheTqYdcYUp/7vSvnZovN9G/37lcAFrlZX9WM4Gapw74iOoUbio3AgFmk
bASkYvN+XL4WmkGA2nFoc7RhzGTjDibxuXFmfO3u9+v4/88/cwYuExq0Myvb6hMx/gxm63Pq
CuqFn2lCIecGzQ8jm7IttMreycTm3T0u/Qz59toc0ahIpxmxmZdTrrr37y3IilpMq0p5bi47
6Jldr9sxhoyY3NiCvcIrhRv9QbW09pl4pHNDsanS/bY1KJHYvB/dpV+Hvj2m//+sR18e3Ttx
Sa0ZhzavxVv7I77fK7MTPzctyygx8y293Z/GHsL12WnBz8rYyc0QJf50vj2tTszN2odM0awW
dapJQgI3FJu2/HKVoxWJjUoKWInLq7sNwpMoOHRoCIc2z4w14bDERm08r8Rl3jfwCA65QXBj
uAkrqun/fQM3FJsq3W9bg0oRGyvzbBahlIw0OrTvHZpr38cnNimRFbn5nhvTe1hRzVBgY4SE
5Id7Nm35+SJG+5XYzMtrl8dbvJeDfGGKANDXiY0OReKIluwzT4rtoDC+9j37DuiZc6vcuPZ4
fjzpztZEIMANmh+KTdEWWmfnRGLjExVGNn6j+HIzOTWxQJwuHdgzamYikIkbZ1QzWIxPVCL7
eUh+KDZ1+vOiRyUSm3/u/ZkpHfrSPd7yczfIF6ZoYPtt+Oe1jzz2Tn2eQbCz0dz7M6FsOHIT
O5OUwKlrr+ZjsOncMLIp+21n7wQIyMSmFxMripkFKDEduh2H5khHdsxo1Wl0PZIRRykav04R
sWbK9sFC3UTIzfpQ5zfceKMaBXgiNxQbgTNjkbIREIvNkOJsfKomZa+muXM2q4hj2VtxL4/Z
J9dTP6XijViMz6GY7bcqNtNq1nCuZgduFObeHOoZ9QRuKDZl+1H2ToBAktgknqlxfbKmpdmz
AP6iipCbouiwOoPkh3s2ZXNdZe8oNlXSumlQSGe2qQN8KIgAkh+KDY0tOwIUm+yQF9sg0pkV
O8gTdwzJD8XmxIZw1q5TbM7KHL7fSGeG7x1rRPJDsaE9ZUeAYpMd8mIbRDqzYgd54o4h+aHY
nNgQztp1is1ZmcP3G+nM8L1jjUh+KDa0p+wIUGyyQ15sg0hnVuwgT9wxJD8UmxMbwlm7TrE5
K3P4fiOdGb53rBHJD8WG9pQdAf1QG/8cuDs+dK88/211OJJ2tJ8doRwExQaFJOsRI8DIRgxV
9QWRM+fqwTpggEh+KDYHENh6kxSb1i1gGT/SmRFVPAJIfig2eH5YYwQBig1NRCGAdGZEFY8A
kh+KDZ4f1kixoQ0IEUA6M2GTLJaAAJIfik0C8CyKQYCRDQbHGmpBOrMa8ChtDEh+KDalsdtA
fyg2DZAsHCLSmQmbZLEEBJD8UGwSgGdRDAIUGwyONdSCdGY14FHaGJD8UGxKY7eB/ojE5v3o
LqGzJAm3dSJfmDPQE7ugyzcG+XPuq4qneuebOTXuQvd5kZs/kUlhuJmbMi5Qy8UPxUZENQsh
ERCJjffStPSroVtyaFuudx64TXrOeyvkLELXZ6dcqHKSPodGbuwbU813DcPNPBW4D4c/7/2U
QPYfkh+KjQxzlgIi8I3YvB+X/mW5dI93f2W08BZP5AsDhGGHqtwRx3Q3fcjBCJ8zZsQ/loL0
9TxNN2YLkD5wcpOLGzWhkAvNwBOSH4rNDq88qwwjsFls1NJawhLaIEjIF6Zobv+e3bVfvro+
10sz1szYnjonPjcvlcXuux/bodhMMBzNTWjp02/VyHeHYlO096izc1vF5nUbZoFpUU1TYjNH
HpYG+H6vzCv5uQSxmZ2sHQVNjSOdWdFvSzLG82iSn/NwM/Nwf06iN+A+/mhLni78kPxQbIq2
0Do7t0lsNkY1FJvehg4UG+7ZbBWNrc95xEYtga7EZS4bEByKTZ0+uJlRbRGbrVENxeZAsXE6
uLWZI51Z0S9QcoSyj9ikRr1IfhjZFG2hdXYuWWy+iGooNkeJjUqBDm9II51Z0W9LqWLj2UtS
WCL5odgUbaF1di5VbL6JapoSm8M3oT+bQN193BOIZz4hnVnRb8vR3PhEJbLEiuSHYlO0hdbZ
uSSx+TKqaUpsVOaXsVYCS33+mGMoQWDOehIITVMJAodz496fiWUqUmzq9MHNjCpFbL6NatoS
G9nhTLVpr6dIJx0cVF8JcJ2zucoimj2WaUp/gSQY78eNazk1nlVIsSndqti/IAJisXndpvTM
xHM15mFP5AtzBmpjnzZxObRhXLHnVFbbJ23WSp+1P1Wjl3UdyyE3rjNRvrNSS8qyeZYqzs06
4UDxYtVjGDiSHy6jncF7VNZHsdgIvxAQ+5IA8oWpjIrDh0NuDqcgOjFE9ZBig0KS9YgRoNiI
oaq+IMWmbIqR/FBsyua6yt5RbKqkddOgkM5sUwf4ECMb2kC9CFBs6uU2dWQUm1TE8pZH8sPI
Ji93bK1HgGJDM1AIIJ0ZUcUjgOSHYoPnhzVGEKDY0EQoNuewAYrNOXhiLz0IUGxoGhSbc9gA
xeYcPLGXFBvagCDKJUjlIkCxKZcb9kyAgHUoUL9fg39e7hohFsSiABsQvNKiItyzEcHEQkgE
uIyGRPPcdSFnzudGoszeI/mh2JTJcdW9othUTW/S4JDOLKlhFhYhgOSHYiOCnIWQCFBskGie
uy6kMzs3EmX2HskPxaZMjqvuFcWmanqTBod0ZkkNs7AIASQ/FBsR5CyERIBig0SztLrUfTbL
F4p/Mt1xXxoS5fUnjZuh/xSb8lhkjxIQoNgkgHW6ov01AytxCd+ZgnRmp4Mqe4fTuKHYZCeI
DaIRoNigES27vumeHPcV0RSbY7kLcUOxOZYbtg5AIEVs3o/L+qzFhovU9nRo5oVjP64bwnTM
5rvgvWeNfLdfOuq12v6cybh2z/WdXAHW5qUVT7+jF6oJ7GG8ltqzlJaTmxg101DsC+DCz6ml
KRPz1HpcQB7LDcVGYNwsUjYCUrGxr4R+dbfBoV4e3TvhYrW9HNroRH90J+O+513Ghme56fc+
ia1XbFKExdGTlPpnoYzd7rhqZX7G57D35WaJppRoioRDE8bYc5MNmHYwi0RCPU4bOZgbio3s
zWWpghGQic0sLEYkM0U6l+7x/tfFbuhU/76PQ3OLg3XPvJAH6znlaFS0ghabaP3uWfXkXN1L
Yi6R8QmlKrsLN05RtAXApqYv8/w1fh14bsTw2t3vwzKhLvqJ9ZgdKYQbio3w5WWxchH4Xmxu
3evwyCYkNgJn7Fpac067/RvsMmFTyzm+Pnnq90QxqzZNp+hcKgs7+T3ExoeLDC/zvfH0X4vY
ZPW66imbG4pNuT6UPRMiIBObf920jNb/fKKbd/e46H+XRTd7OLRxdV8toXxEIrzG7oPHXo7T
S8bERksx7rGyl7g2OrRZSCz98/0+xP0cAbj2kfbgxuv8t/Rd7bGtgJgwVViLxCZQjz9SDC+t
7s0NxUbo0FisXASkYjMsg5kJApfHW7x8tu8y2oTv1xvoTickExuL4cAav98ajnVoe4hNPwsY
JykIZ2zv2fj2Y8J7Z7G9Hzc/x3JDsSnXh7JnQgSkYjNFNvOS2fvRXdT+RWJG2i4O7RPZzMtT
epaZLO1pRCsc1Ywlxll0NMttxl68p/LhCuzQBkfviAJ8/d+HG5Uhpi8dLgcaxfQo8daWB134
RiMbRz2yV+VYbig2MpZYqmAERGIzi4sZyailtdtLtoQ2RDe7ODTPnoZaWhM5tGhUky42Ucdn
h0NuMdscHdgpvyGh3IWbKebsnld9idG1kR96SdzLj0v22Xr58pPKbodTE76SpIrCuKHYFOxE
2TUZAhKxUctnlqh4RCiUmbaHQ/MuiySkB8ejmgPFRpIgIKM7WGoPbnwNhs77rJ+J7XOtS/sF
Pq0eu99fJG8AuKHYgEBkNcchIBGbf6/bGJFYezTz7w+PbOaZv7UhL92EFkU1qWIjSe81efct
032Z+iw0r3xis97U93fPtQQXHoxbbNLrEYuNitqMKCp9CTVOEpIffogzjjdLgBEQic2/OfNs
daampEOdrpPj9qFOFQGZoiSLakJiM7S13pSGbkIPC1HjZ2a0NhKiNqnJIJ2Zv81QmrqewbdN
IGyx2VaPXGzycMPIRmrFLFcsAjKxmfZkPunPG5MDdtuzmdG11vCN2aZTbCRZY+YZFjV+a7N6
vS8h/kyNoP5hiF9n20WscC+xMfvt2kOzuXHsN2nXMvv24Wyx2VbPB6pCuKHYFOtC2TEpAili
I/1KQO49G+lYWS6MwF5iQ9wxCCD54TIahhPWkoAAxSYBrMqLIp1Z5VAdMjwkPxSbQyhsu1GK
Tdv866NHOjOiikcAyQ/FBs8PaxSs0yOWx6R1IF8YkotFgNxg8UTXhuSHYoNmh/VFEWBkE4Wo
mQJIZ9YMaBkHiuSHYpORODY1IUCxoSUoBJDOjKjiEUDyQ7HB88MauYxGGxAigHRmwiZZLAEB
JD8UmwTgWRSDACMbDI411IJ0ZjXgUdoYkPxQbEpjt4H+DAbMH2JAGziHDaBcEsUGhSTrESPA
yEYMVfUFkTPn6sE6YIBIfig2BxDYepMUm9YtYBk/0pkRVTwCSH4oNnh+WCMTBGgDQgSQzkzY
JIslIIDkh2KTADyLYhBgZIPBsYZakM6sBjxKGwOSH4pNaew20B+KTQMkC4eIdGbCJlksAQEk
PxSbBOBZFIMAxQaDYw21IJ1ZDXiUNgYkPxSb0thtoD8UmwZIFg4R6cyETbJYAgJIfig2CcCz
KAaBFLF5Py6rMzkp10GrD3UiXxgMAnXXknLhGrnJawsp3Aw9Q/JDscnLNVubDVjyxebpls5b
9+pv7BzKK+FJFRzkC0MCwwikXiVNbvJZVCo3FJt83LClnRAQRTbvR3fpvzRwebxHoZl+3t3j
0gvQ5dG9P79T/+b/fzq0nYi0qv3rnteeH+P+5Onq7Hv36+gGuSmXG4pNLm7Yzm4ISMRmimIu
3eO9FhHf73kt9G50ySv+e3bXfoJwff6tnrFm1Nq/Umzk8H5VcgM3FJuvEOfDJSDwjdj8e93G
deSUpTQ6tEys/95HbozAput8vwfvCWQa5Tmb2cANxeacVLPXxmw2umfjExWKTbm2tMGhcSKQ
ic4N3FBsMnHDZvZDQBLZfPZntASB5XeMbPZj54uaNzg0is0XeKc8uoEbik0KwCxbJAIysdES
Aj5XEly62829l8M9mwKo3uDQKDaZeNvADcUmEzdsZj8E5GJjZ5iN6dDMRtuPnG9q3rAJTbH5
BvCEZzdwQ7FJwJdFy0Rgu9i8upuVDs3U53JYZupzOVyYPUnnhmJTLpvsmRCBbWIzCc3P7aWd
u4kLzbC8xtmzkBhAsdSDg+QGALqwilRuKDZCYFmsXASkYoP4VA3FJr8dpHwShWKTl58Ubig2
eblhazsgIBWbaHq08CsCdGg7kAiqktyAgNypGiQ//DbaTiSxWj8CFBtah0IA6cyIKh4BJD8U
Gzw/rDGCAMWGJkKxOYcNUGzOwRN76UGAYkPToNicwwYoNufgib2k2NAGBFEuQSoXAYpNudyw
ZwIEGNkIQGqkCNKZNQJZ1mEi+eGeTVbq2NiAAMWGdsBltHPYAMXmHDyxl1xGow1wGe3UNkCx
OTV97PxgwPwhBrSB8m0A6a24jIZEk3URASJABIiAE4H/QNyNcDQ4DCoAAAAASUVORK5C
YII=</item>
		<item item-id="33">iVBORw0KGgoAAAANSUhEUgAAALAAAAAbCAYAAADcbAVzAAAAAXNSR0IArs4c6QAAAARnQU1B
AACxjwv8YQUAAAAJcEhZcwAAEnQAABJ0Ad5mH3gAAAR2SURBVHhe7VoLdqwgDHVdLsj1uBo3
42J4SSCQBPzU0jfqpOf0tOMA+V3CTXAI/uMeeLAHhgfr7qq7B4ID2EHwaA84gB8dPlfeAewY
eLQHKgAv0xCGofyO8xwm/jzOYVXmrmEexfhpebQzXPkLHlgmwMsUlnUO4zCGeV0KXhA3FSbM
94ipao3zejQz8DqPoBQqIxYiIeZZ+nqZ2s/Pq+EjH+sBBT4AcjakJLdWXkOM5eebaxx7pQlg
ysJG6jpPYcRs29pRVWY+FuwjXuIBzLwUf8isCgcA4GmCZ3hC1wlOAXhzjWMfNQAcU7zGKSgz
w97inSLXBeGTStXHQn3EmzwAeCGw8F+2DQGcgE0UVGbnEBSA81y7xrGfagBnLiMmZ5BGcI8C
sJiZHb/Hjv6+EQxgsJwwpU9vDeDr3qkATPzXUAIJUqIX+Xuh5HUdfOYHPWCLdlnA0/+XC3ON
jVhXleT3RwCOxFtmWNg+6ShIXpYZ2unDB6F3d9F1cuPNgnvibwDcog/AT2bFEVJ1CVo4fbg7
iD6pX+t05s4E0E7ZhfiFmopCtOhDWOaa46aW2kgk/WY/fir8KCD/i0KU7lriw1Wj4Edq58EC
wHWBVtGHPK019poCXWc1T5CuEnyx0x6wbTUxkRKg7XSdXlgNJAAzwc4EHklKEhKf6RZInLPV
fdC3c1U7TtzcKa7N8sQE1IvGcBWbjS4yeA2bScoyWh+9XrIrO7TcEtH8LDeNs59LWlE3krqG
kP6Ffij4rRTB+lYqzzvlC6s7K9Ow9xo2Ls+yeDq8yLgsKXR+Gy0FmAORARgRT62UHCSZLTFg
xKkTYJNB+oYPg41Bw7+xMV6PtwWoPikUReLmOcmGhntutqf1gTrlBj1flXLDXm3oHRlYAKvL
n8ZYji7oEdupJ3yxq7uu9G1H6RdYueXUji/z7NGKVnfDXpgUYJKnCOAi86fALgC2eF2Ja8ob
HjO/Ag9iQwd3hLVGmx5QzghgYn7PAOfWIX3P3N8CVMuobzTj+CzS2qgomrDNjKONW+m+r8st
0ddBqX4Abt3SsYIbN3jx5Y+cblX/2QafwAeAVcEX/eqqAFXvbqSjWoBV97OLJyMVKXrFz2Uj
4Wd9h89jjYxNmw0dUxvivC+qzHpgbwes3HKJbgAmAG00vVvdDQsgmR3xGFVgJdpgbwAl3agz
vOZhlsMzHbExMRkyyS1m6Xl7MrayL/togbf8yt7Vth37olWTxIuCrZrllujroFRfAItMpUBr
spHNcnSPzlkPj0s4vmc4xonvxq534qM5pcfxwFPpPYx8xCIAZXEjAt3g3JX/rBybHTM/TQWs
zbJChgawLA7BqkVvlHpsyuotXyQdKt13dOmAk9su0Q3AkZPK94h1h1h1Caq310Q1jt+Zat8W
a7k7IHkpZR/Jic27ykKmogEiNK2iUB4qbEPpMmzLqLs4bCMXovK9a5lR932xpbv1/9uLNw5b
RwDfdpO6Yi/2gAP4xcH9BtMcwN8Q5Rfb6AB+cXC/wTQH8DdE+cU2/gP/8HER8+6xEQAAAABJ
RU5ErkJggg==</item>
		<item item-id="34">iVBORw0KGgoAAAANSUhEUgAAAJIAAAAVCAYAAACtzrfuAAAAAXNSR0IArs4c6QAAAARnQU1B
AACxjwv8YQUAAAAJcEhZcwAAEnQAABJ0Ad5mH3gAAAM9SURBVGhD7VnbceUgDHVdLsj1uBo3
42K8IBDWi4dt7uRjlZlMNrlCiKPDkdAul385AhMQWCb4cBeOwOVEchJMQcCJNAVGd+JEcg5M
QUAR6diWa1mM7+2YsuF/5eTYApbbdZz7tS7rtZ/89Oe+MqwB4rAmQX1e+8rzsEoHhk3J3bqH
T+8vuZfMMfjuxNvKnalIadMAQFl5XFsklwjuL0mhY/zLaCp7s8RQPJEk9G8xj4k49M6OnBNs
aG5gX56vaFP8SmIHe00kHlsPXZNIcCCpQDm4R8IUAt7ULeqFVPl8pq+XITxeFhMGCQ4XkSQ6
kUMrFPjHpObNFEmMICybRMqbDOe+38KgFDIQew+yUYl35NwGkZL6aMJkVRplUkXOR4JSNjN9
vQrg7aKAWapX+ScwJan7II7viGQrXjlFFU8r3rGzayKhHOtspprNAOB1HGu47LPuJbZ92op/
hmu0r5wIRfaKbwCNlozbTvccY6B9snqo7G+IhP1Q9Xw/uJh2s232QvImpd8xWHngSAB+kIZ9
Tjb1RddqX5EMpIaL9SDRrHTEvaN9/JlKSoy3R6TqwwMfI4OqQomHSVZLCeGhv8kGw0SiD6Re
L/t7IqXbagLMkpVvNUGDJ/tOGFMb054TTN926SuKVyDK3TkaMYvyHFUg2B8bki/GX+lRPsnN
wOKsSDaJNa7DRMrkGWnO9UUbiLtjwhWpwVTWvAEYmAhd8+1XRMW+WkozBeWLBHhE1MRaL84B
JA/EYa+W3q39jq3tAZXH3P87kUqL0FLLXytSlf2irvOZhHwmalVr2cNn1UNbCsnVpPpiKYnS
ijdS1qAtrs3UPpQ26lcf+wGRjr3MpRQGmax1WO251pe7QxTJLjHWbKMMrnBnynD4dyQX6WOk
ahB7KcUMFMsX9DnBPwIpfKd4SdkqT1oMNpfKsH7aaOJxBjoPBsIAu1Rhz0dUm839kmrLmVT/
1fb4IGUBEKk59WxJMN5MaxjGml0xpWU+Gy85HKxRX/g30W+1JrqsH2mWlvdAvllp4l6w0ZNt
No2G82sb+4V8Xyy5Z+/BMXou/7+2UaTcromAE8kJMgUBJ9IUGN2JE8k5MAUBJ9IUGN3JP93E
zHKQhM0kAAAAAElFTkSuQmCC</item>
		<item item-id="35">iVBORw0KGgoAAAANSUhEUgAAAGUAAAAbCAYAAABlVEF+AAAAAXNSR0IArs4c6QAAAARnQU1B
AACxjwv8YQUAAAAJcEhZcwAAEnQAABJ0Ad5mH3gAAAK0SURBVGhD7ViLcewgDHRdLoh6qIZm
XAxPIAQScAGFs+N5w81kbpIgELurH4ffn9chcLzOo+2Q36S8UASblE3KCxF4oUudSLm8PQ9/
HPhjXPDaeWuv97jvDPhmvLusP4/T28t5k/yNfqPT7FP9/7R+fBu0abaaRaHxcdbQtzXFGXmp
+PuKc/O+zK8UFwZysmURVA/My54KkL9JCvdxfM0qUoIjQXncMFxUt+n42MUVIUKi2sFfoXrw
1Rj4WxBSfQ/vdaTc5eN434qUpLRKZs7OhPv4sO+tADKij/RNOwdSElkxnUkxPUpK9q32cYxC
W1Niaujl5fFmf7+CSAFPYr2R92hJkfXzEFEn01ewpToryZZ7nF+ovf2WmC40VRD1VFCdKpcs
jcWaIBgpkRcEkoCSpCCYBcQELqVF3ujkdIl3vSBzYB0LNixNJtx+3RwkKD/PKTcTo6dyxkKS
Eix4oyJIoWZBlE+MrggqB7gTddGMsgrv/JgIZjzurSmkwAE1w6i0tmD+9rD77VpSUM1YXyzr
vvBudQODKStGT616IoanxEDKDdkkk9Itgj01Yfx6s5A7n0pfWQQM0Cy8pHIpRFZHPqUibvcJ
n0X1ZVIQqE7P34ZPGtgWT77FvG6R2SENCSWCaM6J0UPKr9KXZfNowAprEa9D6Sw4Z7XYJ1JY
i/nDZFwr3MBMgMWapTjKszeE9U88yu6oP4nPd1/8BQDu5lInR9gIoY5eE/TqUz9IFpWUwyIg
4Ch9693YFhwBJSm9ib90Kqthu6lBBFSkiJwrEMTcutqfb1LUpNTDFk9f0E4bTGH7s47AfKTE
biR0Z9UDJXUbbOq9LMwE47fxde//0x3mScnTK3ZaudvJ0VHegHZtWVPLPClr52xrBQKbFAVY
Ty3dpDyFtOKcTYoCrKeWblKeQlpxzj8d0RfUhUZ3HgAAAABJRU5ErkJggg==</item>
		<item item-id="36">iVBORw0KGgoAAAANSUhEUgAAAGEAAAAVCAYAAABWtYB0AAAAAXNSR0IArs4c6QAAAARnQU1B
AACxjwv8YQUAAAAJcEhZcwAAEnQAABJ0Ad5mH3gAAAJ0SURBVGhD7Vhr0usgCM26siDX42rc
jIvxA8QXmkjS621/2JlOOxUFzoEj6RH26+sIHF+PYAcQNgk/UASbhE3CDyDwAyF0neDMEY4D
3ya4qwCdYZsjnNY/TyPtP2243e1tOCmWl36eREYxQc7k8wxdWlXOhA/F7oM1nMNs/00sYzmi
AweB4EEZmBuSFMl7eyoJdMFcxaLwozZpQGxzi4Up8JA43OyfxTAkYeiUTkLmAbyPKxPOOS9I
lhFjcrOOmWWpWUdQyQ+QXvnDYsHKN0NZwAJhwi72a1wPSHDBWguH9469NbAWpWgclMYl2rSJ
3u3CgngledpQsh3EREmlT44zS8/4QA9YRX5G+3VB9CRA5RmHDAuggWkDQhkrQ0oRVna6S8ag
5bsGqwyru2Hxav+DjtHl+8yKJWd1EQwuZgQ4glKcpwuIwaoBlIF2F1skNIPO9uWIuJ58EclJ
DnKLz7ErA0Uphjhg8PtN6/Jl/J9JKK1ISXHgJEM4xnQASrJKC8etA9Lot9RJ/XotP0TIG/Dm
nOksvkICSVGML5PAMkSQSilKE0GdUt0Jo/VaipopTHQME/hNDkjn6y7WUffYqpEjZ4rWR1kA
UtIcXBPDbhrp4N+IPJaTuptoWXRSmjzGzyU8eXicxuevJXKUcr4ZkTGHTwulIkFMLPJZYXRJ
iUqXo21DAuk7kIpSBN8tDSL8gJQwll0E2XkH04eGhTlPLy3K0CDB/leTG5EwrMhKhroqq6Jp
1uQ8Xz3xxu7g9s527VRUPw+kmFZfilpmWoziZf9pByTf+w88LQsL7TYJC8HVHr1J0CK10G6T
sBBc7dGbBC1SC+3+ALUZfEOZeAcRAAAAAElFTkSuQmCC</item>
		<item item-id="37">iVBORw0KGgoAAAANSUhEUgAAADQAAAAVCAYAAAAJiM14AAAAAXNSR0IArs4c6QAAAARnQU1B
AACxjwv8YQUAAAAJcEhZcwAAEnQAABJ0Ad5mH3gAAAEySURBVFhH7ZWNCcQgDIWdy4Eyj9O4
jMPkTIz15w5NK1ektFBowMR8eU9r8GGPeRgPvkC7K/oqdLdCwVk0xsQX0Cs231ghj3ACJLNu
CiQwoNGklW1LIA96i/UurICyxAZ5MMGhrSXvY4Wfry1JfVjnxHLn4DqFqJhF5yOMdRjiMQQ6
jARTx4NO03QH78xGHjif9kuGC+isHqoFomIWEIBg4kMxxJhhJM7f18Y/z2Kg7kYTyNksqHgD
lKYbFeLuiaedDMWaovOuhxL/uKKTDTV7V0BJ2pLUFxH7TbpdthzbvGuez28Z9KiFAnScE1nO
9hOrHfbz8a6AQ8ElJQbJ6WdabMdD0shTW46K2Ow1sVtdI0++XvMvoGJ3uVyUMF9n6J8N3lV7
yx/rCvwLtDK9O3Ifp9AHcHobehyzNuwAAAAASUVORK5CYII=</item>
		<item item-id="38">iVBORw0KGgoAAAANSUhEUgAAADgAAAAVCAYAAAATtC32AAAAAXNSR0IArs4c6QAAAARnQU1B
AACxjwv8YQUAAAAJcEhZcwAAEnQAABJ0Ad5mH3gAAAE+SURBVFhH7ZaNDYQgDIWZi4GYh2lY
hmF6lH8QsBI90WhyMTmk5et7rTJ4+cVezgcf4NMV/hT8m4JaAmcMWPgJVaTWkse1aml4xGUU
zAEQsoBQwsAJcMgKRL0+QFwE0By6K4sGyRvAXIIm2GsNQKuQs+eG01qXg8xpWv91YBNg1gMu
iascJuVFdELZDj2S8jT7r7BnCEy3aaUgbkSv491VDXtjBKhENhjyIdEZFmP2BBuVPBUQg5nI
SoSGxoSVPQ6pM/ewLVogbAF6t1GmaaEgBuYGKG7EQMRmnkPp7PKFtqun9aAfv7kd9+xph/ap
FvXABjCps52i9pVCLHw5ZIpNvg+VBHHpkKlUbLkGFY1now8YjBwBN2qFqUqs1LRF6y+YTr7H
f8lMF2hn4xov+qvocotemOPW0J+Ct5b/hOQ/MmRE6qmzaK8AAAAASUVORK5CYII=</item>
		<item item-id="39">iVBORw0KGgoAAAANSUhEUgAAADIAAAAVCAYAAAAElr0/AAAAAXNSR0IArs4c6QAAAARnQU1B
AACxjwv8YQUAAAAJcEhZcwAAEnQAABJ0Ad5mH3gAAADqSURBVFhH7VbBDcQgDMtcGYh5mIZl
GCaXAL0r/ZxbOMQhkKqqUgp2bDclWWTRIjxkE5lNya3I7xSJ4pmE2Eu8cchkigRxpCTs+m8i
WYLoeROxNggXWV0QCa5ITE70cejqoIh5lIU1bEZG2aXgsf8euw/xowGXe94QWu1EglNvqgJv
3DgRCCFY1EzEulo1LtmNBRAEhIiVNRIxW9V5SHYBLTGPtaz7p293BjY+6KZZOvvpHElyHsPI
7qASmFnQqtNATFhwW5fJbqHGX0JhjazLRC62Ggmg11lUhfSmL3uB6LHPZD+NzyktQ+QF772f
1WvQ85wAAAAASUVORK5CYII=</item>
		<item item-id="40">iVBORw0KGgoAAAANSUhEUgAAADwAAAAbCAYAAAAgVez8AAAAAXNSR0IArs4c6QAAAARnQU1B
AACxjwv8YQUAAAAJcEhZcwAAEnQAABJ0Ad5mH3gAAAFxSURBVFhH7ZcNDoMgDIU5FwfqeTgN
l+EwXam4gaCDikrUJcuSOX6+vtcHU/iwl3oYL77Ad1f86QpbBKVQ+bc26BK5HRodnvnnYC82
Q9hPts/tbZUVtkDQGk1KzDNZKH9/Lv2WMAJgZwC1VzNTkRZqrOiRhXBGF5zYDExWMWRXVhkw
Ma4zCCXZj6TamLsP8Bdqso2OAL3yA/FiF+AYykIcXqQ8LIOsXVqecw7G0mdDGHYAXkCR2noO
r8zOv9SOXdBeAvmIDsCW+jeO5gBFVV+z85WpvR/YmrxHwxGli3b2fb4Itj+CDWTptR7Nw+vL
5IvR0HNy85ZHphlTN/t08WAV5zDJFVu3s0Kw8ktA3RZLv4rW5H3XX4Z23KXnRUOBOOB8AeQY
Z4yUA2d2ngpwW2DfPwlcfISdIZVwDaHCeTpzgIwuLxVJBrywM5+HjceTUKDdw2TAHOwj/Teu
r4MYuH6JsX75Ao+lR//dvAr3r+lYM34AHF8qfEwxhlUAAAAASUVORK5CYII=</item>
		<item item-id="41">iVBORw0KGgoAAAANSUhEUgAAAEIAAAAbCAYAAADI1VnXAAAAAXNSR0IArs4c6QAAAARnQU1B
AACxjwv8YQUAAAAJcEhZcwAAEnQAABJ0Ad5mH3gAAAGxSURBVFhH7ZcLrgIhDEVZFwtiPV0N
m2ExvPITCuXJIIxjgokx0Qm0p7e3Vdjz8gTE4RAIHBBRCQfEAUFNoVKEtkoIK9xbgjXkWWNB
xt/c70p/yV5iHE18IRwDMsSP7ysh8q2hFR4kLVAS/iKt+O/vofJfoXxwGLeyoUTh2VEYLAgD
ykpX/eYUPLxTiXtAFFXvKJaE7MAMxsuAQOkBMiV0Y5oGrOJkcieFJP86QYxN1irmvuvE2oJ4
JRukJYvEnVIewCH4QA2CK9yF9mhAlMlqVZomKkXVBjouBX9WMmLuc7SZe4pYC6JKtpTWQ9ri
NRlGFOHjHzPMZnwC0X4cVVitp7RFF8RSj9DQekAcpfKDtghjd3Nr4Nbj9pyyw1gveW+WPQ9o
TXPcGfY8Sb2ruIOMy5k9wlc9VSwtJPkCvi2K5aaaLnvSz0tSjrVd7tZulgOZ+AuTDhHkBdMf
OP3+R+b/fXpzatVzfwprbpwHERxweIVdE+6+U6ZAaMiLlTOucvvcF+rekydA0DHlHfzXDQIZ
T4Cg0yL/7d1bsd2nT4DYHdJ3zj8gIvcD4oCgLXgUEXn8ATCXeMcJZfTUAAAAAElFTkSuQmCC</item>
		<item item-id="42">iVBORw0KGgoAAAANSUhEUgAAAFUAAAAVCAYAAAA3raI2AAAAAXNSR0IArs4c6QAAAARnQU1B
AACxjwv8YQUAAAAJcEhZcwAAEnQAABJ0Ad5mH3gAAAH/SURBVFhH7ZiLjewgDEWpi4Koh2po
JsWwYCDgD5FRwr63EpFGIzFg4Pj6kzHxPJ8TMJ9bPAbjgbpBBAfqgbqBwAaTglKv6K2JxpSP
C3nXEL2/4NvVcWN9zCP9wetMWhhct9Ps5fH/56lnZncpJ7y8JRx0J2dQAcRw8QYGsQgubWYj
cCZPcHi8rHfJHdkneV1zlO6A+2Y9CaSdtZ67ikmrBwI1b0RhZW82482DLtqsZrZLWk+8jp1U
LmIlb+yj92gZ1DiJOiakiaLpBgRqDQcCK/gx1NMcn3QHqsOwU7xEh4AViLe59Lv9C1DhnERc
0tjEXTyn1hCd5r4bHFfd5R1OCQj8c/76R0IteZMqUBLMQgqQW6qqKB4WOXl3cBDa94ESNIeL
15jooVApkpJY3FpxVNpYcdDvQS2lD0IVgyXgxpBgoV+UCflT9PzK1fVzV52ihlp5KHQxvFGl
i9MFRWljbmmtVbtkz8Es9FEOIrlVz2j7TBHqVzk1G+fFnBSj4HkbVdsrK4X+kKtoqzajtaq0
t9S11V+eJ+9+51TUT5bWt7wE9NLNcmYxKbVJwthDb/sWzJv1uC4MlvJ5b1GsRVqFmhYBvKEh
HotC6wigYJA2CtJvL17z4jTY1iSmN6RUa8ldhZeZz96oVOc5kx4JnH+pNgjkQD1QNxDYYPIo
dQPUH66h1fDpbjNPAAAAAElFTkSuQmCC</item>
		<item item-id="43">iVBORw0KGgoAAAANSUhEUgAAADUAAAAVCAYAAADmSqZGAAAAAXNSR0IArs4c6QAAAARnQU1B
AACxjwv8YQUAAAAJcEhZcwAAEnQAABJ0Ad5mH3gAAAD1SURBVFhH7VbtDcUgCGQuBnIepnEZ
h+G1aFtq/aE+fB+2Jk0aYpDjjlPgCRdMiIkfUP/C6j2YCoQMAPuHFISgUxyJY3T0Cky41NJ4
Xpkp7wSU86roQIzgWIfGQvLstuZagBJWVCLv2rtlBTivpSZvgalIeZRd7NaJsZqshntsQInM
kIlWCX5SbuVO2IBK8wQrsE43ELkqs7n8N1BvAkoKchRdZw6m9Az12anhOB1XyVvuJ9LTc5Rs
tTHpD8kvMZPrXYzje5bec51ES9/NIQ34xkweX8BtLwxrmV3zqctXTKfeuO7x9hvPwPgTHqbG
99jmhCmZegGaRXEvTtMOAQAAAABJRU5ErkJggg==</item>
		<item item-id="44">iVBORw0KGgoAAAANSUhEUgAAAFAAAAAbCAYAAADrjggCAAAAAXNSR0IArs4c6QAAAARnQU1B
AACxjwv8YQUAAAAJcEhZcwAAEnQAABJ0Ad5mH3gAAAISSURBVGhD7ZeLccQgDESpi4Koh2po
xsUQJMBGIAyYOZJzuJmbSzz8/Ly7koXdnykCYmr2nmw3wEkRbIAb4CSByemvVeChpRVC4FeZ
NiWj/Fj89kwIS74ToFEOhLKem7GqARHhSW2PAAX/74T4QoCH1TJTHQBNAFE9+vFSR3zA/G48
nf0+gIe2Ukib8rDctZODB5gCBvsToDcJcAHETa7MuDIhWqGdI39iBLFvPFHDxvHe0bZubFWt
5R1mCoSNHP3TAoy8P0yJhHkM9fS3lU1PAGJUQm6CgMYEQwGi990CZxyUAPMblFpjSOPmxZML
9nhQ3R4/Jw5gUFidPZwTwHmljkAkAAEO2aSSHb5FyHIGD55dO6saf/0xpLuJwxkI4qNFJK/K
d9slAIE+lW+tnHPXD63Q+mX5H8uUaQu7ZiSvwvjAq7nG5WPJogaRFpG8F2LzgNvQHVq7AK7Y
R5GS+BHd0UVJG9LqA8sq/KiNSTv32268YhEPyR82bQFAmav5Ac36mwgDLKj2fBMZr8KwaF9O
cXZIIdH8cOuqq8NfoL3lW3gLg6q6qHNtTQYpVaj7e7l9FyMUJLRbENmqbFz+Ja9B0Q6unP+W
fVcyHHqVY6uZ0WXGhZZGvty+8KAGAJYFwnm/knHc2JW6WLdXF0C2Qp+vPnzn/h/sO6jAdU/1
m3bqUuA33dDqs26Ak8Q3wA1wksDk9B+H/NhPINZ9fgAAAABJRU5ErkJggg==</item>
		<item item-id="45">iVBORw0KGgoAAAANSUhEUgAAAFIAAAAbCAYAAADve9g/AAAAAXNSR0IArs4c6QAAAARnQU1B
AACxjwv8YQUAAAAJcEhZcwAAEnQAABJ0Ad5mH3gAAAILSURBVGhD7ZiNbcQgDIWZi4GYJ9Ow
TIbhwEDAhB9zcXJtRKVK1V1i8Iffs6kw64eFgGCJsoKYBZKpCBbIBZKJAFOY11fkvkkjhIBf
pfvU8mfjO0JIs+1j2u8GqZUFqIznp43qwvTfJ4Dhb7kZAsc3N5vdbLKoQge2BUbrADyrPvu8
pJSjfeW9FblvRpayrH3WUa1WNFm7EAkkLJK8RKtY5lEaY5/4U08gWcedjeSdZ2CfJcoagzx8
RBp5SMLLg1renCDTQVZ8yx34qHNcBTkh6zNI8BBbgYe79kHiZIMMbIyYYxXGCADXadRABtVR
tjAj6xNIlzhapOUpsMmyKjz0clzwMIM9hPcoiVzmeckj52RdgHT+gf0QIJRZd2GcN4BjeI+i
WMVladuhpezaMCdSfG9S1udmky2CKimWR2xIzZKyoNB3hbmH9ykgL1ckjI75uENvNLOyRiBP
U30Fln+GPhJAIkeVB+lTKoKFog/Svtm09jMv6wykCzoCNA+CcjiMzH4ays+RTnLDSglXKHKn
yDp+dRT5ad7siwtk6l2YkyBR16T7E3uGDwWcuiJWG9CxUVuBKl3wyw5ZnQAeSvKJZaZAggXA
NbK8NrqKyz22MuaAvEc+/ETK96wxB9Ibahi886tbAttuMNm/qcg+e0/Sd0T9AuQd2/j/MRdI
pjNcIBdIJgJMYVZFMoH8ADkaoBJn8zZ1AAAAAElFTkSuQmCC</item>
		<item item-id="46">iVBORw0KGgoAAAANSUhEUgAAAE0AAAAbCAYAAAA53gJaAAAAAXNSR0IArs4c6QAAAARnQU1B
AACxjwv8YQUAAAAJcEhZcwAAEnQAABJ0Ad5mH3gAAAHmSURBVGhD7ZiNzYQgDIaZi4GYh2lY
xmH4WkClWqXwocQcl1xyyQFtH97+qPLzU01AVe+YG/yE1iCCCW1CayDQsOVGac4bpbyCr7ZL
w9EjtizeavBZW1/2eI8PYzRO7u8FNDxQ+8DKGaETcqPPrMwgFKEhXONXTovVQRxScCw0Z76k
LnoFAUAJmrNRENsnKVRI7QwNlaX2W3hGFc+dKoLGmEehqHpoiXaqY18F1wYtxi5kdp7Taoj3
0kuwuV0W81saDTjUBG2xXpdSOgv2kJ6xmFb4yHMLKS7tYr3Qx3NaoDmTmp7QFQoNiXeqZ+j8
iFGlFhqurxUJgVZr8PpisEbIb29YekJGkIsF0VjBvJZBi8WwjzogzStqhDArRMvCBUhsryWE
1FLZ1LBDC6l5pQ7aWTmwm1rQYXSoVvMiJHeL6ISvSCz0SWEdZk/NR+jzBi0cxG0KMDMFnuAm
Z9e9ab3Q/r9RjTgAxjFI4ssGwKVs3mG5SZo+oowI6mmboFCciy5ymXs6yJXG/T8kNZ/GRM+/
fZ/GddO80J4G4R9ITcR3/xLyoKRY7PdmQaCFqdpA1wTVClv3u/roZ6345pbMUMdWnpS1T/+p
KUhafr8YXj+pCO11jz5gcEJruKQJbUJrINCwZSqtAdofT6jYm8QJjy4AAAAASUVORK5C
YII=</item>
		<item item-id="47">iVBORw0KGgoAAAANSUhEUgAAADwAAAAbCAYAAAAgVez8AAAAAXNSR0IArs4c6QAAAARnQU1B
AACxjwv8YQUAAAAJcEhZcwAAEnQAABJ0Ad5mH3gAAAG8SURBVFhH7ZiBccMgDEWZi4GYh2lY
hmFUBBgjIIkQPtup07ter0kIPP7XlxIFD/tRD+OFH/B/V/zpCjswSoHCX23BE7k9WJ2fw+eN
u9QMzsjOMlbYmQCtwVLiCOjM+PEz6SNsJUj8nynAENhbAxrV7N4kOKBT/kxU3Cs5TddqoEDM
cw2AwxvaYNeosgFiXG/BjGQ/lTmXVgXoraYX8OY8PXCBSvVc3yQqfzlvFNmCLjky57oOuIai
tRJu1rRBNi8tCZstIOu/zFpMDsTgalz44UgNcAMVbzKH1C3svNGgrRF06yp86AbYhfqtoznX
S7j129g5dgpaam1qvxOZAjvb12huUfoAO6e2VvVPkaWTqtT5+BhP5Qr4VY324TVfuUeu6FM6
1vNUWyoBMA6B13beJzNMc1SPmzlrV9BMfUxY3FM+S+fWsLUt7IWzibkGLVstBN7DrGyLLjlH
XhlpXiUD7qawdAFfwCuzdDusJztf/6GCI71IYQIc1NYGP2ysT2GcA6++RgRcZtk8z84M76sH
Xl0vAya7Yv1+h53X2tIez+wpZ1WdI9YvKFx9HXSDr3y4l7EAzN3iXq97HPAfM/kFZEwt+nAA
AAAASUVORK5CYII=</item>
		<item item-id="48">iVBORw0KGgoAAAANSUhEUgAAAGgAAAAbCAYAAACQqsrOAAAAAXNSR0IArs4c6QAAAARnQU1B
AACxjwv8YQUAAAAJcEhZcwAAEnQAABJ0Ad5mH3gAAAKMSURBVGhD7ViJjcQgDExdFEQ9VJNm
Ugxnmyfm2ySgCN8uK0UrhQBmxs+Yza6faAQ20dYt4+wiSLgTLIIWQcIREG5eFkG71dtmN3yU
sUdi/GGN8mM4rnfhR3tqnj9fcW63zmGUwwWe2tFHx1vW1lPcrsEQZU3KEK2x6/r7p3DI+v6T
Y9KhAQ9tnUu6bxOSRsc/gFEl6DDaKoyWwlXAuIaHyQK8zxqKgkbmKAiJ37nI6x//bGuFINjQ
gK8kXuEXOYzVtbDqw0PcrCpBcGaVZxP+bnT8AoWSoEiCC2XFCMHI+mJ+XJ3JI6jmqDzNjY4/
JYiTsGsuFiCydC4c5gcB2RiETe3/gZj5BwRlJGSh/M3pLSq1OxFEuPi60ygFt8efRdAO9YdL
Ny89wQu/Pb01CRqtMVfzHxG0m7LGeMmtBKY3J/tfTnHQDeYqLU2Fo+O3VVyrxpRiYX7leceC
tOayPdBJY+pr9EEj45d9EEVJ8MTQkJ2zivTmc3Bs3vx8qsdhLVac0eNIDcZ5oW84bydOtcia
xkxFvkPL2XyeGJTN+OhNwdX81tn6L0sRbPQaJERrkORwKJDh2NxGQvyu6e0DEoBOgP8OCP49
HSSQC2s/EGHv8Tdx5W6CCFQgRtVuG3hjR1HDopIIBXpgrrs6wShiHpt/PxEcCVt3E3QvX/si
zkjEeQoIia9CJHI0kpwvAaZ5NnQSFNJUaTgREKQ6AJ2Q4Tvw9HbC1ycsX+ZshJN15uEzfec+
gnyaqtAT6woJApDmRvl6gyFTRIuvQyDvNdz/cTlLEfrrBQgA7iIIwatjl13bZ2ovFw9R1ZFE
TdXbeb0/3YmnGtBF0FSLf2zzRZBwwhdBiyDhCAg3b0WQcIL+AG/RL1diHAxBAAAAAElFTkSu
QmCC</item>
		<item item-id="49">iVBORw0KGgoAAAANSUhEUgAAAWIAAAAdCAYAAACQX2baAAAAAXNSR0IArs4c6QAAAARnQU1B
AACxjwv8YQUAAAAJcEhZcwAAEnQAABJ0Ad5mH3gAAAX1SURBVHhe7Z09cuQgEIV1rrmDrzHl
Q/gIDhT7Ar6BMsdOnbomcujMN2CFJPSDkOjX9Gpk15uqrZqtlWj6Ax50A7OV44cESIAESOCu
BKq7WqdxEiABEiABRyFmJyABEiCBOxOgEN+5AWieBEiABBRC3LhrVblq68+1IVUSIAESIAGA
AC7EzdVVQWxvtbtUF1ffeovNtXLUYYA+HyUBEiCBlgAsxLe6dmHNe6svrrrUbtBh17T/Fr6T
LgmQAAmQgIwALMRTsTdXXyp3CcthmT0+RQIkQAIkEBHQC3GUliBZEiABEiABHQG9EPtc8Swt
oTPPt0iABEiABNRC7Dfmxk07ciQBEiABElATUApxf4SNJyTU3PkiCZAACYwEVEIcn5YgTxIg
ARIgAT0BUIjjyxzTGWJ9FbRv+rpcx6N0Uyn9aQ5Z/nrpT/kKH7E989sk3w7a7jZbZxdzipwH
bQ+udxN6V4dUO0r7hdz2ZG9+IamkD8tte2+6dF5gXsTbl6a3XXbSyXLMaMrC/N7uRahtyfNb
mpTvy6AQ5ws85AkvXMnBO4OV3UhcQusHaYkgILbnlIb3svXdI4vbjkVJrwu47VaShtuZJbw7
aZtueWb5bdwIzb63xR2xPYjw/Mx90R6LwvbYwP27OjH2Iji1WehDur6jKQvze3vEoLaB55Wn
yX6hEOdnHVHq5HaLLp/4cktWR32zi2wvFsNXV0cXY7STmdx266tu9GxWDbLtV4WG9kW2m2Yd
PbUTuk6QZvGXqO0SZ+4NoiCR350wRBPe5kIm0/OaerxFO/T2PvrUtGVBWSK/d9ctoB9oXVPM
M2h/nRD78C43eFQN5eFpOlQEGLLdDghvEnpnp0HF5XQDsQ+TDVyGJqA+PC9dCS8hiP2O2DXX
oybedTjt65zrx7kJWeR3SnSHtJRF21uenpKWJfI7B2/VF7AJJVfXro4A4JUQv76+joP0/f19
rO7397d7fn4G3bN+XLZqhRvKd0x1iKoVhWlVCtd3A6usnEEUzPLDSCQQwuJ69sNR5aIs8zuG
1tbFoM3FtkNOvhucB9ruhDiacMyEuO9LgN7sLSPEZYmZi+UH9UPwPLgqXgixF9qHhwfnxdh/
9yumz8/Pzh3/9/Bd7F9q1in55TZhSIU01DJXepwoNNco13akKIztMoly6WASMR9W4n7S63+v
JNgv4y6yvdLh8rRE54EoNTEYHyORMn+DKzLbiT2IlDhrBrXhAqYFKV4MyfwGHAJsD+GfoK7Y
Ed9RiL3Ivr29LWr/9fXlXl5e3DlWw0OnF4S1moYKgnxIuNg2fD37tVBNfVPdTFtOLsySdGmR
7dREOohTyUQgsr1aFJSnJTAhDhs+VhuVwCQQn5ApPqnSw7RI7YRmQcrStPdeH0Zsy/3GNkWz
OWIvzn417MX43p9eLPOrCV1D2fyIkcT24hhTFCEcLUjDiILyWepJIBnRYCsHte3FizapAUSI
472Nrg8URkGSvrbmZdfPS/rqvF7eD6Qsnd9p9dLYltXVWIhDmsJChPcEqNs8ynn4H1ITc78s
fk9Z00k079gI0hQy59Dn2l/mQ0J0lcd94oEMiZrBaQlNemDJOH/6x4b5shRZO2Usx/yiCC9X
7+WcGKWIBGWZ+NAvbZcbpjnb0PPYAiO7IvZC7FMU5/jINutUqw00T7QBRGPbqmNpbCO5uf3w
TrbCi6Mai7QI6jcaipb7nbiEYHB8DfPbJh/vxWv9v/Pko9QkQ2VZmN+bAxXzA61ryWZdqso+
R3ymz/7xtfjQ/jwPGA2GGGxhmLi4XNClG3ZsR0DLhRjwO84X3sFvuxtmgN8jc6u0BGo7Oq1S
xB2wPWtvk/2P1Ga7IpxabpKnbhymbtDt+S1XKdR2/vlEAqj0+Nq8yJ+fH/f09CT38JAnZavi
Q6pCIyRAAiSwIoCnnXZTE36jzqcmTvcxyCuezidWiARI4A8QwHLDweFdIX58fDxRfjhuI3zW
+QOtTBdIgAROS0CvSbtC/PHxcVqXWTESIAES+CsEsqcm/oqj9IMESIAEzkrgH+c7v7TZgg8L
AAAAAElFTkSuQmCC</item>
		<item item-id="50">iVBORw0KGgoAAAANSUhEUgAAADoAAAAVCAYAAAAXQf3LAAAAAXNSR0IArs4c6QAAAARnQU1B
AACxjwv8YQUAAAAJcEhZcwAAEnQAABJ0Ad5mH3gAAAEWSURBVFhH7ZaBDYQgDEWZi4GYh2lY
hmF6UA5FKHctOckpmpgYUqSP/1tQsMijFuGEB/RuSq+rqLcalFL7qy34qfJ6sDqs31m3zM84
fmK0os4EUA12LmHI2oHJm0yBYl4mRMUnxXJhSVDctelK7urQ6yelD2ARnJknAZp+qOfLuZGS
oN6Crl1GjXXc3IIKJvMrRBZJgh5sm//Ht28DOmpbZ4oGVjaz/M0tpsAwAfTd8QRJybTiRbNB
0X28hlQpyrcCL+WxqPNrlKyD2MnN1zZ+unXDaV53XUmZFYp2bIv2yGfXmELSWbhpvXN0G5e5
L4Gikh+aybSaLS4MmE97afntzUgqwQXi173UX0CcoRQfRYe27Y8nvQARdu9TM4EMAAAAAABJ
RU5ErkJggg==</item>
		<item item-id="51">iVBORw0KGgoAAAANSUhEUgAAAPQAAAAdCAYAAACdZEG0AAAAAXNSR0IArs4c6QAAAARnQU1B
AACxjwv8YQUAAAAJcEhZcwAAEnQAABJ0Ad5mH3gAAAKzSURBVHhe7ZwNjoQgDEY5lwfiPJzG
y3gYdkEZFXVo/RnRvE022WSZUh79LBQc4/mBAAReQ8C8ZiQMBAIQ8AiaIIDAiwgg6BdNJkOB
gELQrbfGeLP1a1toQgACNxOQC7q13iTRds43pvGu671vrfHo+eaZpHsI/BMQC7pzzqcc3LnG
m8b5Qc++/f9f+huqEIDAfQTEgh5d7LxrjG9Ser7Pd3qGAAQyAnpBZ8ttiEIAAvUQ0As67KUn
y+16hoInEICAWtChAPYpjsEPAhCoioBS0P3RFRXtquYQZyDwIaASdF7dhiMEIFAXgUzQ4+WR
eRU7v1QynkH/fjjBF/s5Qsur7+fs7/tKPrakswsvKam+XYnXVoyXe1nJ0KGzOwX7xelQkFsV
8+SBc7hgh61y2ExbwOsSXjtPk5aCDoYOi0I3RFnr8lPrzC0BtmSzklrB6wJeUdRrq9HtvhaC
DhNT46WRUF0v+UVQXRBUQpOwF4Iamkl5xXaKKvRC0OO97GGdX0VVO2Tn8jZACkmCHlsSSpMK
RnYdWPfpeWvYT3gos/RKUSyk+HEffUbGjmfXR97U2tw7EwgI5zuB5z8cdEfFc0EPb1S1NmXD
OgpkcVIEe4nnT15ZnoyxzGja4vm8ekGXtptpzDNBx+W2tePFkUoKZAiapa1Oxm/itVvQ/T61
ceMXFZyx3A5oWXLPXzfdG5zhc8/POOXRM8Ypo71L7kU2ToWo1rvbX5WUFcXig+OkIzdslYU3
CzvYq4CJ42tvUWyRjaOhUMzSnYOpRqVo/P3Y6sybbNhSTEtYf2VfTVU+jdi2j62czeFjK91k
/rK1LEv/0iP6gsC1BMqXqfL+VS9nXOu8wPrO63ACyzSBQGUEdHvn5PyzBB291j+1Kpsp3IFA
gcD+GH+goIkGCEBgiwCCJjYg8CICf9B14Z2VE7uMAAAAAElFTkSuQmCC</item>
		<item item-id="52">iVBORw0KGgoAAAANSUhEUgAAAIEAAAAfCAYAAADAzK5jAAAAAXNSR0IArs4c6QAAAARnQU1B
AACxjwv8YQUAAAAJcEhZcwAAEnQAABJ0Ad5mH3gAAAPUSURBVGhD7VvtkYUgDLQuC6Ieq7EZ
i+H4hgQwQdDTN9zM/fAdBkiWzSa8W+QP/BybkNsxeCPHJsVwo4PXOMjcMsjOcDNiWeRS+BU7
nOrYVrneFKxW27sor3nBix7urT6DLwaBkCje+U4fOK3dLLMLOUFwEaRioUGwi3V8GsDrVUBb
e07yBMFFBKjXSBDo4KybHC0FCnQjt7UDbBME94GAzNfa+UVdQTNMTgYduuMfQKB9Y/fO2+tH
NcGhTuciSZbWbKGcEcfZ95ZWBukJZM+7zWdoVwzKD743/1EQ2M2SIDBsAE+DPSW8ExJiULDD
js9jIHAAIJ2Sr/ybIDAnnM7TpmRDTjGftTIBc74iMB4CgS1PG8HtFpyAwFOJO2GOSoNh/Bx2
7CjW5V9cs8f8pIKmmjomAMGWP83Rhn//VBiygpKzhV8LxEWy/ho4WPNVuOERENi9rptqcAUd
xAcEYgJtTAVr98pbPytjQYm758iTbnKr0Y2TgyOdc4PH/UK9nve23Jzq41TsnYLA0DPBBEVh
mDtGnyAPPLP+Ep1m2oKdDKRkgKDaZPIBpSje7VVXS7a34oHNAwIEgTa2CimEK73MBtSzD6z5
uy/LcJD1fqNDcypGYs45Z1f248JjYHtBwKP9CEAbVvzsgn0zCBogVR5a0iwOGBR+tEEAAovI
GAicZ/RzPNjpaUSipLQo48iITAMYVX8He6ju70sHmHVOqBqkgErV8fZ0UBSuTPEMQYAdgI3A
VBBzfS5IaiwQqTYPEq77u0DADBpMX5FGs7sIpr2rwrA7HRgGQ9VSw5ojE+AOHKB+zZS2Bx56
6Rh9yaQQBKng3OWuuT/r9kUt4m/uzjuG5ygvVQWlALFB8IESEZe+XB+AdIBPIqB+gwF7QxZP
CawKQNkFRJlOAbCJkXX7fLWQUDPVNk71RyxUbHModAqpUhAD3QmqLI8yxF01r/e82ygWAKNw
xEBeIjbOePNwCgRVJd+yLqRTasKw2KJOgX4GtgdB0LL1dOw3m0UmfY+5QKJLRM14qBwFN4tE
p26C4Co2GbeIJkXRXUN6BUSzqHCVfChhk95e5toimXWCgA5BbQSVDsx7vXf9jOWxvlRyFugJ
AoaXK0NYIDA4uOH7hX5NzG8uYRENtjRBcD8IbIt0RFpAa+VqDoqNJgieAMH1Ofrf1AAk+vMT
BNfdzE0H12fof5MlTCcIrjv67SDQFQHox6hgF/szEwS/CYJyr7+SFiYIfhMETbuaIGhyFxj8
9nTA3tkEAdtV2cAJguu+a33zxXcHvP9FbN3wnePn/yLe6d1p+1YP/AGYtWpo8jA5+wAAAABJ
RU5ErkJggg==</item>
		<item item-id="53">iVBORw0KGgoAAAANSUhEUgAAAFsAAAAbCAYAAAATbvP1AAAAAXNSR0IArs4c6QAAAARnQU1B
AACxjwv8YQUAAAAJcEhZcwAAEnQAABJ0Ad5mH3gAAAJJSURBVGhD7ZjbkcMgDEWpi4Koh2po
xsWwPG2BEQjWqzizZCYfiRFIB3ElLOz+sBEQbCvtheyGzZgEG/aGzUiAcSlaZh/aKn0wuvXk
UsYqIaxIX2XGcx9aouPhszynENJS8BBgH1ZLYSlOjsPgHuFBK5v5RlDX76Y3RoExcaOu2MuN
O2FLbSmpOIRtVMyKr4R9HBUED6uXhY3E8vAzTGPOjTs3yj2XlLR2Bn3YbiKltZXEY8Kdt9Pr
OTmUvazxz+tYW/+BhY2iSYg3wWFnx4pjNR3eewx8PKPj3oy1lhIYkns2mhMMR2C746SSDn0Q
dpawqxBdhS78R9S2sqh1NHsW9oSEoJl9C3Kwe+X4dKy8BKXK1IRGBPXk0cjQUY1twQ4y0q5Z
MxLShg0g+QEBFAY7OFdnWCwydTsUgaesSnb8vKNvKOwpzZ6TkDvsRgEJkFpUusDujpTzRB0c
VfGnZKRQWRcPvsn3biSchlayTUpICRu2OKd3SCako4VrpoNZRFQVmWQ/gv2khIS5qEXyhIsX
x1kJSbDLRv0EkCUi377A7kbto7c8TovARSHJzEQVX4beiSHO2fald4OMdvMS0m/90AjnYd2u
uPxivbxfTxoOb5D3xdJJIAMDUvTBNvJJaKtz/T3sosL3LgirIXyP3QLs1A6iL3TAhSjUpLKa
o93N9zBb9nQJdqjqoXDWt7H6RU+jxQtSMlFcl0N7n+EabFjJwbtiCB8viqD7Iev++8CtePQL
2CvL/W+bDZtx/zfsDZuRAONSO7MZYf8Aeo0oKGqmcQ8AAAAASUVORK5CYII=</item>
		<item item-id="54" content-encoding="gzip">H4sIAAAAAAAA/+yaTUgbQRTH30w+TKKpiqFaFUmhoAW/YuLXTVuF0i/ESBE8pahFiIp6CIXW
g+2pJ6Gll1578SDYS6G0x9560EN7K/QkIi2SqlX6Qbczm51JsruTbOIoKexCspPZ3/u/N7Nv
dt8uQeAFcPysBqiGRqCbk3wcyAMusq/ACfQG0ZYX02OU+I0PFBWEVcT4sZnZqaXg7alEcHR+
NjYH4692EjHyCQ7sJpYbpq9Rpo3QeqXDIpWQNCWcoWTWMvo7a7vCWyYzgsvIV/T+7N35OMCX
el/3g91twYw4LIzCClP6M1usXb75XW/wrTd+Fc2v00JMTs1HBV2dzAfxgvGtaDAam1sKRqcW
Z6bBB83wRD2mkC1JfKbsXTqdPcUtiHWs1vf9ozBWN9eh+yT5nX9ejopciW5pSmWWzmjusVg/
V2exou2VWYids5hVsC9eBR7dKvBYiMGYXWeblaV1XuyMP107a/eUIlbFQcu30l8Vdnadrl1R
mXP4P2SO9WuleX392FF4dWIcrdE/lsRYGassXzZjMzZjMzZjMzZTOszJ6x3rdYsVxqV7i/wO
g7YNLs7ESPFIq8cf77dF1aOX69B9kvz2kP0vopJ6SQaYcbQi/YPVd2OYefdlxENbCNOjtIUR
AmO0qZ52VGdyzGzWzGMp5/3qprD+ClUhgAMQUVs1+CaKALPRMxOcmRAyK5xZETJrnFkTMluc
2RIyx5w5FjJNiDFNSMQMc2ZYyMQ5E89ikoTJPbd0RpntU4F+K2dahYyfM34hs8fP4x6ImE3O
bAqZDc5sCJlVzqwKmQXOLAiZUc6MCpkwZ8JCJp3DAR2T1BjRlYuev4suB3S2h2ACdehWqPUr
YFqni+jckaATJjoPJehEiM5LCTrdROeDBJ0eorMvQaeX6FxAJ9fpIzoDEnT6ic69onXKVB0E
nTCKLkuYnRB0oaCUbK6RohOGQ5ChE4FPUnS64bUUnR54LkWnFxJSdPpgXIpOP/SfQIdlcwjq
IXc2p+okrWLJeVVP30fT1Qo7GuEW7Orvy6qGFF4N+cFB9k2q3/NOqkatGYuz2HP8Lv5M83mD
ex9EK1rrL1RqrXV4pEUUhR5DRH51dM1IUbLvT35d3aZYjjTNVhoivY6WtdYQKtdaHSihxVeL
wgXEpz9riOfJyHSMVEefLWSHR7NxQqhtZPItVJrYZNbYSeLf6De/HxHTjszyz5Vdv/F+NvZ0
HZ95lEWYq57HJn2sxk/Fku9JZK3O9yK+I3oSyfTtVWfWBVeuDg8FyR2EVbKuPPFRKv1vm0mY
hADNKTeAG44IcIlkZCospLWQ+sG6pxtq34L9UJWVMan/76R6qtRcBvgHAAD//wMAPp6TnvIj
AAA=</item>
		<item item-id="55">iVBORw0KGgoAAAANSUhEUgAAAcgAAAGFCAYAAAB5Z2NYAAAAAXNSR0IArs4c6QAAAARnQU1B
AACxjwv8YQUAAAAJcEhZcwAAEnQAABJ0Ad5mH3gAADNcSURBVHhe7Z2LlaM6EEQdFwERx4ZA
NCTjYFjAn8GYj6QSUOC7e+a8N7NqWdxuddGSYG5N86/hCwbEADFADBADxMBnDNweQKb+ECwE
CzFADBADxMDvxgACSQXNCgIxQAwQA8TARAwsCORMYcmPIQABCEAAApcm8KiaEchLO5mLgwAE
IACBeAIfAvlaY47vBgsIQAACEIDAtQggkNfyJ1cDAQhAAAKZCCCQmUDSDQQgAAEIXIsAAnkt
f3I1EIAABCCQiQACmQkk3UAAAhCAwLUIIJDX8idXAwEIQAACmQggkJlA0g0EIAABCFyLAAJ5
LX9yNRCAAAQgkIkAApkJJN1AAAIQgMC1CCCQ1/InVwMBCEAAApkIIJCZQNINBCAAAQhciwAC
eS1/cjUQgAAEIJCJAAKZCSTdQAACEIDAtQggkNfyJ1cDAQhAAAKZCJxYIOvy1hTVPRMIuoEA
BCAAAQgMCZxUIO9V0dxuCCTBDAEIQAACWxE4qUB2ODqRpILcKjDoFwIQgMCvE/gBgewqTb5g
QAwQA8SAbwx4SvGPCKQn/Meo2pB1Hh7jE72DfzWA7vyYw5p/e35tEeP5B4E83C/uCYDxaSEC
v2vzQyA1/yKQOr/JHkL3IH3vTqggc4QGAqRRhJ/GD4HMwI8KUoc47gGBzM90qkcSqMYZftfm
h0Bq/qWC1Pl99fB6zCPkUQ8qSM0BJHj4aQQ0a/f4QyA1/yKQOj+pBwRSwschHQ0f/C7OD4EU
Hdya++boEx/SCXWLL/zHFbjfITO+0Eibbge/a/NjDmv+pYLU+Uk9IJASPgRcwwe/i/NDIEUH
U0HqAJUeEEiFHhWuRg9+V+eHQKoeZolVJyj0gEAK8FgC1uDB7/L8EEjZxexB6gjTe0Ag09kx
+TV28Ls+P3ycwcc8B6lDTO0BgUwl97DjkAn8NAKatXv8MUc0//b8EEgdYmoPvvARoFSfDu3c
Eyjj07zszg+B1PyLQOr8pB4QSAkfFaSGD34X54dAig6mgtQBKj0gkAo9llg1evC7Oj8EUvUw
S6w6QaEHBFKA193d8eu4JIDwk/DZxx8CqfmXJVadn9QDAinhs09QCBD+1Qjo1sSgxtA3R/Oq
Oc2zGayZXBpE+MFPI6BbE4MaQwRS4ydZ+8J/XBaTS3Iv/DR88BP5MYd1gL45mgpS967YAwKp
[truncated: 16,646 more chars]
